# Supplementary material for: Accumulation and expression of multiple antibiotic resistance genes in Arcobacter cryaerophilus that thrives in sewage
Source: PeerJ. 2017 Apr 25;5:e3269. doi: 10.7717/peerj.3269 (PMC5407278; doi:10.7717/peerj.3269)
Supplement: Data Set S1 [file peerj-05-3269-s002.xlsx]

## Sheet: Sheet1
Sample	ORF	Antibiotic Resistance Category	Sample 1 Unique Reads	Sample 2 Unique Reads	Sample 3 Unique Reads
Arcobacter cryaerophilus	scaffold1_41	Sulfonamide	383	440	338
Arcobacter cryaerophilus	scaffold10_27	Vancomycin	275	1355	1332
Arcobacter cryaerophilus	scaffold10_28	Aminocoumarin	173	308	288
Arcobacter cryaerophilus	scaffold10_28	Aminoglycosides	173	308	288
Arcobacter cryaerophilus	scaffold106_5	Fluoroquinolones	101	248	249
Arcobacter cryaerophilus	scaffold109_2	Lincosamide	29	75	73
Arcobacter cryaerophilus	scaffold109_2	Macrolide	29	75	73
Arcobacter cryaerophilus	scaffold109_2	Streptogramin B	29	75	73
Arcobacter cryaerophilus	scaffold11_17	Beta Lactams	548	1382	1484
Arcobacter cryaerophilus	scaffold110_5	Fluoroquinolones	758	1638	2583
Arcobacter cryaerophilus	scaffold111_5	Vancomycin	122	524	339
Arcobacter cryaerophilus	scaffold123_2	Penicillin	441	560	505
Arcobacter cryaerophilus	scaffold124_3	Polymyxin	162	134	178
Arcobacter cryaerophilus	scaffold124_4	Polymyxin	81	258	294
Arcobacter cryaerophilus	scaffold124_5	Polymyxin	65	267	244
Arcobacter cryaerophilus	scaffold130_2	Tetracycline	4379	5514	6033
Arcobacter cryaerophilus	scaffold131_4	Macrolide	25	45	61
Arcobacter cryaerophilus	scaffold135_1	Fluoroquinolones	218	839	725
Arcobacter cryaerophilus	scaffold137_1	Fluoroquinolones	829	906	604
Arcobacter cryaerophilus	scaffold14_19	Polymyxin	483	2727	1895
Arcobacter cryaerophilus	scaffold141_5	Macrolide	0	60	36
Arcobacter cryaerophilus	scaffold147_1	Aminocoumarin	27	202	103
Arcobacter cryaerophilus	scaffold147_2	Aminocoumarin	18	81	46
Arcobacter cryaerophilus	scaffold150_2	Bacitracin	2565	854	874
Arcobacter cryaerophilus	scaffold16_16	Macrolide	191	114	108
Arcobacter cryaerophilus	scaffold16_23	Aminocoumarin	946	1630	1428
Arcobacter cryaerophilus	scaffold16_23	Aminoglycosides	946	1630	1428
Arcobacter cryaerophilus	scaffold16_24	Polymyxin	135	696	619
Arcobacter cryaerophilus	scaffold165_3	Aminocoumarin	124	184	172
Arcobacter cryaerophilus	scaffold165_3	Aminoglycosides	124	184	172
Arcobacter cryaerophilus	scaffold168_2	Macrolide	186	227	320
Arcobacter cryaerophilus	scaffold168_3	Macrolide	67	108	175
Arcobacter cryaerophilus	scaffold169_3	Beta Lactams	207	204	189
Arcobacter cryaerophilus	scaffold17_15	Macrolide	65	181	231
Arcobacter cryaerophilus	scaffold18_22	Macrolide	155	714	658
Arcobacter cryaerophilus	scaffold19_18	Aminocoumarin	2546	12132	10570
Arcobacter cryaerophilus	scaffold19_8	Macrolide	85	116	115
Arcobacter cryaerophilus	scaffold197_2	Lincosamide	1662	2509	3340
Arcobacter cryaerophilus	scaffold197_2	Macrolide	1662	2509	3340
Arcobacter cryaerophilus	scaffold197_2	Streptogramin B	1662	2509	3340
Arcobacter cryaerophilus	scaffold199_1	Erythromycin	1747	4071	5535
Arcobacter cryaerophilus	scaffold199_1	Fluoroquinolones	1747	4071	5535
Arcobacter cryaerophilus	scaffold199_1	Glycylcycline	1747	4071	5535
Arcobacter cryaerophilus	scaffold199_1	Roxithromycin	1747	4071	5535
Arcobacter cryaerophilus	scaffold199_2	Beta Lactams	360	1268	1418
Arcobacter cryaerophilus	scaffold199_2	Chloramphenicol	360	1268	1418
Arcobacter cryaerophilus	scaffold2_34	Macrolide	48	385	243
Arcobacter cryaerophilus	scaffold213_1	Mupirocin	704	2577	2498
Arcobacter cryaerophilus	scaffold216_1	Mupirocin	0	30	18
Arcobacter cryaerophilus	scaffold221_1	Fluoroquinolones	16	37	21
Arcobacter cryaerophilus	scaffold224_1	Chloramphenicol	91	255	205
Arcobacter cryaerophilus	scaffold23_15	Lincosamide	1616	1800	1475
Arcobacter cryaerophilus	scaffold23_15	Macrolide	1616	1800	1475
Arcobacter cryaerophilus	scaffold23_15	Streptogramin B	1616	1800	1475
Arcobacter cryaerophilus	scaffold23_4	Aminocoumarin	47	89	80
Arcobacter cryaerophilus	scaffold23_4	Aminoglycosides	47	89	80
Arcobacter cryaerophilus	scaffold23_5	Vancomycin	155	405	322
Arcobacter cryaerophilus	scaffold23_9	Chloramphenicol	337	1246	1196
Arcobacter cryaerophilus	scaffold23_9	Lincosamide	337	1246	1196
Arcobacter cryaerophilus	scaffold23_9	Macrolide	337	1246	1196
Arcobacter cryaerophilus	scaffold23_9	Streptogramin B	337	1246	1196
Arcobacter cryaerophilus	scaffold237_2	Macrolide	11	15	20
Arcobacter cryaerophilus	scaffold26_4	Bacitracin	108	161	107
Arcobacter cryaerophilus	scaffold3_25	Aminocoumarin	232	81	77
Arcobacter cryaerophilus	scaffold3_25	Aminoglycosides	232	81	77
Arcobacter cryaerophilus	scaffold3_26	Vancomycin	393	204	165
Arcobacter cryaerophilus	scaffold3_31	Tetracycline	126	339	412
Arcobacter cryaerophilus	scaffold3_7	Bacitracin	774	1258	1503
Arcobacter cryaerophilus	scaffold306_1	Ciprofloxacin	154	72	65
Arcobacter cryaerophilus	scaffold306_1	Norfloxacin	154	72	65
Arcobacter cryaerophilus	scaffold31_17	Ciprofloxacin	26	139	95
Arcobacter cryaerophilus	scaffold31_17	Norfloxacin	26	139	95
Arcobacter cryaerophilus	scaffold311_1	Fluoroquinolones	896	2547	1972
Arcobacter cryaerophilus	scaffold32_11	Penicillin	1001	2495	2379
Arcobacter cryaerophilus	scaffold32_12	Macrolide	87	655	614
Arcobacter cryaerophilus	scaffold320_1	Aminocoumarin	41	254	311
Arcobacter cryaerophilus	scaffold322_1	Aminocoumarin	43	389	321
Arcobacter cryaerophilus	scaffold324_1	Vancomycin	148	2283	1040
Arcobacter cryaerophilus	scaffold326_2	Vancomycin	0	12	12
Arcobacter cryaerophilus	scaffold335_1	Aminocoumarin	47	366	503
Arcobacter cryaerophilus	scaffold34_1	Aminocoumarin	42	300	455
Arcobacter cryaerophilus	scaffold34_2	Aminocoumarin	54	800	845
Arcobacter cryaerophilus	scaffold34_3	Aminocoumarin	3071	4029	5560
Arcobacter cryaerophilus	scaffold343_1	Streptogramin	127	364	459
Arcobacter cryaerophilus	scaffold35_11	Streptogramin A	373	1870	1531
Arcobacter cryaerophilus	scaffold377_1	Polymyxin	272	216	357
Arcobacter cryaerophilus	scaffold382_1	Aminocoumarin	49	253	169
Arcobacter cryaerophilus	scaffold39_4	Ciprofloxacin	410	1378	1439
Arcobacter cryaerophilus	scaffold39_4	Fluoroquinolones	410	1378	1439
Arcobacter cryaerophilus	scaffold4_15	Macrolide	274	849	743
Arcobacter cryaerophilus	scaffold4_36	Lincosamide	189	395	336
Arcobacter cryaerophilus	scaffold4_36	Macrolide	189	395	336
Arcobacter cryaerophilus	scaffold4_36	Streptogramin B	189	395	336
Arcobacter cryaerophilus	scaffold4_37	Macrolide	70	277	214
Arcobacter cryaerophilus	scaffold4_37	Streptogramin	70	277	214
Arcobacter cryaerophilus	scaffold4_7	Vancomycin	184	842	610
Arcobacter cryaerophilus	scaffold40_15	Macrolide	37	87	97
Arcobacter cryaerophilus	scaffold40_5	Tetracycline	1019	3710	4242
Arcobacter cryaerophilus	scaffold402_1	Streptogramin	52	100	93
Arcobacter cryaerophilus	scaffold408_1	Beta Lactams	306	1212	1398
Arcobacter cryaerophilus	scaffold408_1	Fluoroquinolones	306	1212	1398
Arcobacter cryaerophilus	scaffold408_1	Macrolide	306	1212	1398
Arcobacter cryaerophilus	scaffold42_1	Fosmidomycin	983	635	720
Arcobacter cryaerophilus	scaffold420_2	Fosfomycin	0	116	89
Arcobacter cryaerophilus	scaffold43_7	Vancomycin	48	186	171
Arcobacter cryaerophilus	scaffold43_8	Macrolide	77	73	73
Arcobacter cryaerophilus	scaffold43_8	Polymyxin	77	73	73
Arcobacter cryaerophilus	scaffold46_1	Mupirocin	296	663	643
Arcobacter cryaerophilus	scaffold46_4	Aminocoumarin	611	663	713
Arcobacter cryaerophilus	scaffold46_4	Aminoglycosides	611	663	713
Arcobacter cryaerophilus	scaffold46_5	Vancomycin	395	781	664
Arcobacter cryaerophilus	scaffold48_9	Vancomycin	40	38	27
Arcobacter cryaerophilus	scaffold49_5	Bacitracin	111	156	192
Arcobacter cryaerophilus	scaffold5_32	Fosfomycin	777	2559	2616
Arcobacter cryaerophilus	scaffold50_2	Polymyxin	194	1157	900
Arcobacter cryaerophilus	scaffold50_3	Fluoroquinolones	4861	8264	8411
Arcobacter cryaerophilus	scaffold54_9	Tetracycline	6234	3971	5235
Arcobacter cryaerophilus	scaffold61_2	Fluoroquinolones	85	126	108
Arcobacter cryaerophilus	scaffold61_7	Erythromycin	290	632	789
Arcobacter cryaerophilus	scaffold61_7	Tetracycline	290	632	789
Arcobacter cryaerophilus	scaffold61_7	Triclosan	290	632	789
Arcobacter cryaerophilus	scaffold61_8	Aminocoumarin	208	600	600
Arcobacter cryaerophilus	scaffold61_9	Erythromycin	74	217	203
Arcobacter cryaerophilus	scaffold61_9	Tetracycline	74	217	203
Arcobacter cryaerophilus	scaffold61_9	Triclosan	74	217	203
Arcobacter cryaerophilus	scaffold62_2	Vancomycin	795	2467	2666
Arcobacter cryaerophilus	scaffold63_5	Beta Lactams	15	48	31
Arcobacter cryaerophilus	scaffold63_5	Fluoroquinolones	15	48	31
Arcobacter cryaerophilus	scaffold63_5	Macrolide	15	48	31
Arcobacter cryaerophilus	scaffold63_5	Tetracycline	15	48	31
Arcobacter cryaerophilus	scaffold63_7	Fluoroquinolones	77	542	545
Arcobacter cryaerophilus	scaffold66_1	Mupirocin	216	1197	1238
Arcobacter cryaerophilus	scaffold66_10	Macrolide	214	467	379
Arcobacter cryaerophilus	scaffold67_2	Ciprofloxacin	3146	3779	4111
Arcobacter cryaerophilus	scaffold67_2	Fluoroquinolones	3146	3779	4111
Arcobacter cryaerophilus	scaffold68_1	Macrolide	21	170	161
Arcobacter cryaerophilus	scaffold7_31	Vancomycin	2146	17898	15827
Arcobacter cryaerophilus	scaffold71_10	Tetracycline	2500	11514	10888
Arcobacter cryaerophilus	scaffold71_12	Tetracycline	3082	22374	23638
Arcobacter cryaerophilus	scaffold71_6	Chloramphenicol	719	403	458
Arcobacter cryaerophilus	scaffold72_2	Aminoglycosides	155	468	454
Arcobacter cryaerophilus	scaffold72_2	Beta Lactams	155	468	454
Arcobacter cryaerophilus	scaffold72_2	Fluoroquinolones	155	468	454
Arcobacter cryaerophilus	scaffold72_2	Tetracycline	155	468	454
Arcobacter cryaerophilus	scaffold72_2	Tigecycline	155	468	454
Arcobacter cryaerophilus	scaffold72_3	Fluoroquinolones	1057	1583	1781
Arcobacter cryaerophilus	scaffold72_3	Tetracycline	1057	1583	1781
Arcobacter cryaerophilus	scaffold72_4	Aminoglycosides	151	605	557
Arcobacter cryaerophilus	scaffold72_4	Beta Lactams	151	605	557
Arcobacter cryaerophilus	scaffold72_4	Fluoroquinolones	151	605	557
Arcobacter cryaerophilus	scaffold72_4	Tetracycline	151	605	557
Arcobacter cryaerophilus	scaffold72_4	Tigecycline	151	605	557
Arcobacter cryaerophilus	scaffold75_9	Thiostrepton	602	1257	1239
Arcobacter cryaerophilus	scaffold79_3	Macrolide	151	299	321
Arcobacter cryaerophilus	scaffold80_2	Vancomycin	573	1180	1022
Arcobacter cryaerophilus	scaffold86_3	Beta Lactams	259	444	386
Arcobacter cryaerophilus	scaffold9_8	Polymyxin	209	870	969
Arcobacter cryaerophilus	scaffold97_4	Beta Lactams	43	140	139
Arcobacter cryaerophilus	scaffold97_5	Beta Lactams	23	172	152
Arcobacter cryaerophilus	scaffold97_8	Beta Lactams	2065	2249	2561
Arcobacter cryaerophilus	scaffold97_8	Fluoroquinolones	2065	2249	2561
Arcobacter cryaerophilus	scaffold97_8	Macrolide	2065	2249	2561
Total Sewage	contig-75_0_27	Beta Lactams	29	21	25
Total Sewage	contig-75_0_27	Beta Lactams	29	21	25
Total Sewage	contig-75_0_27	Beta Lactams	29	21	25
Total Sewage	contig-75_0_27	Fluoroquinolones	29	21	25
Total Sewage	contig-75_0_27	Fluoroquinolones	29	21	25
Total Sewage	contig-75_0_27	Fluoroquinolones	29	21	25
Total Sewage	contig-75_0_27	Macrolide	29	21	25
Total Sewage	contig-75_0_27	Macrolide	29	21	25
Total Sewage	contig-75_0_27	Macrolide	29	21	25
Total Sewage	contig-75_0_27	Tetracycline	29	21	25
Total Sewage	contig-75_0_27	Tetracycline	29	21	25
Total Sewage	contig-75_0_27	Tetracycline	29	21	25
Total Sewage	contig-75_0_42	Isoniazid	20	20	11
Total Sewage	contig-75_0_42	Isoniazid	20	20	11
Total Sewage	contig-75_0_42	Isoniazid	20	20	11
Total Sewage	contig-75_0_5	Tetracycline	343	835	880
Total Sewage	contig-75_0_5	Tetracycline	343	835	880
Total Sewage	contig-75_0_5	Tetracycline	343	835	880
Total Sewage	contig-75_1_49	Polymyxin	0	13	0
Total Sewage	contig-75_1_49	Polymyxin	0	13	0
Total Sewage	contig-75_1_49	Polymyxin	0	13	0
Total Sewage	contig-75_10_15	Lincosamide	27	29	25
Total Sewage	contig-75_10_15	Lincosamide	27	29	25
Total Sewage	contig-75_10_15	Lincosamide	27	29	25
Total Sewage	contig-75_10_15	Macrolide	27	29	25
Total Sewage	contig-75_10_15	Macrolide	27	29	25
Total Sewage	contig-75_10_15	Macrolide	27	29	25
Total Sewage	contig-75_10_15	Streptogramin	27	29	25
Total Sewage	contig-75_10_15	Streptogramin	27	29	25
Total Sewage	contig-75_10_15	Streptogramin	27	29	25
Total Sewage	contig-75_10_3	Aminoglycosides	38	75	94
Total Sewage	contig-75_10_3	Aminoglycosides	38	75	94
Total Sewage	contig-75_10_3	Aminoglycosides	38	75	94
Total Sewage	contig-75_10_3	Beta Lactams	38	75	94
Total Sewage	contig-75_10_3	Beta Lactams	38	75	94
Total Sewage	contig-75_10_3	Beta Lactams	38	75	94
Total Sewage	contig-75_10_3	Fluoroquinolones	38	75	94
Total Sewage	contig-75_10_3	Fluoroquinolones	38	75	94
Total Sewage	contig-75_10_3	Fluoroquinolones	38	75	94
Total Sewage	contig-75_10_3	Tetracycline	38	75	94
Total Sewage	contig-75_10_3	Tetracycline	38	75	94
Total Sewage	contig-75_10_3	Tetracycline	38	75	94
Total Sewage	contig-75_10_3	Tigecycline	38	75	94
Total Sewage	contig-75_10_3	Tigecycline	38	75	94
Total Sewage	contig-75_10_3	Tigecycline	38	75	94
Total Sewage	contig-75_10_4	Fluoroquinolones	12	21	52
Total Sewage	contig-75_10_4	Fluoroquinolones	12	21	52
Total Sewage	contig-75_10_4	Fluoroquinolones	12	21	52
Total Sewage	contig-75_10_4	Tetracycline	12	21	52
Total Sewage	contig-75_10_4	Tetracycline	12	21	52
Total Sewage	contig-75_10_4	Tetracycline	12	21	52
Total Sewage	contig-75_10_5	Fluoroquinolones	41	75	114
Total Sewage	contig-75_10_5	Fluoroquinolones	41	75	114
Total Sewage	contig-75_10_5	Fluoroquinolones	41	75	114
Total Sewage	contig-75_10_5	Tetracycline	41	75	114
Total Sewage	contig-75_10_5	Tetracycline	41	75	114
Total Sewage	contig-75_10_5	Tetracycline	41	75	114
Total Sewage	contig-75_100_5	Chloramphenicol	93	71	68
Total Sewage	contig-75_100_5	Chloramphenicol	93	71	68
Total Sewage	contig-75_100_5	Chloramphenicol	93	71	68
Total Sewage	contig-75_10001_2	Beta Lactams	0	0	0
Total Sewage	contig-75_10001_2	Beta Lactams	0	0	0
Total Sewage	contig-75_10001_2	Beta Lactams	0	0	0
Total Sewage	contig-75_10001_3	Teicoplanin	0	0	0
Total Sewage	contig-75_10001_3	Teicoplanin	0	0	0
Total Sewage	contig-75_10001_3	Teicoplanin	0	0	0
Total Sewage	contig-75_10001_3	Vancomycin	0	0	0
Total Sewage	contig-75_10001_3	Vancomycin	0	0	0
Total Sewage	contig-75_10001_3	Vancomycin	0	0	0
Total Sewage	contig-75_10006_1	Bacitracin	268	535	509
Total Sewage	contig-75_10006_1	Bacitracin	268	535	509
Total Sewage	contig-75_10006_1	Bacitracin	268	535	509
Total Sewage	contig-75_10010_2	Macrolide	73	192	242
Total Sewage	contig-75_10010_2	Macrolide	73	192	242
Total Sewage	contig-75_10010_2	Macrolide	73	192	242
Total Sewage	contig-75_10014_1	Elfamycin	6645	12067	10481
Total Sewage	contig-75_10014_1	Elfamycin	6645	12067	10481
Total Sewage	contig-75_10014_1	Elfamycin	6645	12067	10481
Total Sewage	contig-75_10015_2	Sulfonamide	100	47	57
Total Sewage	contig-75_10015_2	Sulfonamide	100	47	57
Total Sewage	contig-75_10015_2	Sulfonamide	100	47	57
Total Sewage	contig-75_10026_1	Beta Lactams	4451	7140	7952
Total Sewage	contig-75_10026_1	Beta Lactams	4451	7140	7952
Total Sewage	contig-75_10026_1	Beta Lactams	4451	7140	7952
Total Sewage	contig-75_10026_1	Fluoroquinolones	4451	7140	7952
Total Sewage	contig-75_10026_1	Fluoroquinolones	4451	7140	7952
Total Sewage	contig-75_10026_1	Fluoroquinolones	4451	7140	7952
Total Sewage	contig-75_10026_1	Macrolide	4451	7140	7952
Total Sewage	contig-75_10026_1	Macrolide	4451	7140	7952
Total Sewage	contig-75_10026_1	Macrolide	4451	7140	7952
Total Sewage	contig-75_1003_1	Macrolide	0	0	0
Total Sewage	contig-75_1003_1	Macrolide	0	0	0
Total Sewage	contig-75_1003_1	Macrolide	0	0	0
Total Sewage	contig-75_10066_1	Aminocoumarin	0	0	0
Total Sewage	contig-75_10066_1	Aminocoumarin	0	0	0
Total Sewage	contig-75_10066_1	Aminocoumarin	0	0	0
Total Sewage	contig-75_10092_2	Penicillin	11	27	24
Total Sewage	contig-75_10092_2	Penicillin	11	27	24
Total Sewage	contig-75_10092_2	Penicillin	11	27	24
Total Sewage	contig-75_101_15	Macrolide	29	16	0
Total Sewage	contig-75_101_15	Macrolide	29	16	0
Total Sewage	contig-75_101_15	Macrolide	29	16	0
Total Sewage	contig-75_10100_1	Erythromycin	23	251	94
Total Sewage	contig-75_10100_1	Erythromycin	23	251	94
Total Sewage	contig-75_10100_1	Erythromycin	23	251	94
Total Sewage	contig-75_10105_2	Macrolide	0	0	0
Total Sewage	contig-75_10105_2	Macrolide	0	0	0
Total Sewage	contig-75_10105_2	Macrolide	0	0	0
Total Sewage	contig-75_10106_1	Teicoplanin	96	55	35
Total Sewage	contig-75_10106_1	Teicoplanin	96	55	35
Total Sewage	contig-75_10106_1	Teicoplanin	96	55	35
Total Sewage	contig-75_10106_1	Vancomycin	96	55	35
Total Sewage	contig-75_10106_1	Vancomycin	96	55	35
Total Sewage	contig-75_10106_1	Vancomycin	96	55	35
Total Sewage	contig-75_1011_5	Chloramphenicol	22	19	33
Total Sewage	contig-75_1011_5	Chloramphenicol	22	19	33
Total Sewage	contig-75_1011_5	Chloramphenicol	22	19	33
Total Sewage	contig-75_1011_5	Lincosamide	22	19	33
Total Sewage	contig-75_1011_5	Lincosamide	22	19	33
Total Sewage	contig-75_1011_5	Lincosamide	22	19	33
Total Sewage	contig-75_1011_5	Macrolide	22	19	33
Total Sewage	contig-75_1011_5	Macrolide	22	19	33
Total Sewage	contig-75_1011_5	Macrolide	22	19	33
Total Sewage	contig-75_1011_5	Streptogramin	22	19	33
Total Sewage	contig-75_1011_5	Streptogramin	22	19	33
Total Sewage	contig-75_1011_5	Streptogramin	22	19	33
Total Sewage	contig-75_1014_1	Aminocoumarin	250	236	212
Total Sewage	contig-75_1014_1	Aminocoumarin	250	236	212
Total Sewage	contig-75_1014_1	Aminocoumarin	250	236	212
Total Sewage	contig-75_1014_1	Aminoglycosides	250	236	212
Total Sewage	contig-75_1014_1	Aminoglycosides	250	236	212
Total Sewage	contig-75_1014_1	Aminoglycosides	250	236	212
Total Sewage	contig-75_1014_2	Fluoroquinolones	676	174	195
Total Sewage	contig-75_1014_2	Fluoroquinolones	676	174	195
Total Sewage	contig-75_1014_2	Fluoroquinolones	676	174	195
Total Sewage	contig-75_10148_2	Polymyxin	21	66	63
Total Sewage	contig-75_10148_2	Polymyxin	21	66	63
Total Sewage	contig-75_10148_2	Polymyxin	21	66	63
Total Sewage	contig-75_10159_2	Aminoglycosides	24	18	33
Total Sewage	contig-75_10159_2	Aminoglycosides	24	18	33
Total Sewage	contig-75_10159_2	Aminoglycosides	24	18	33
Total Sewage	contig-75_1017_3	Bacitracin	193	103	122
Total Sewage	contig-75_1017_3	Bacitracin	193	103	122
Total Sewage	contig-75_1017_3	Bacitracin	193	103	122
Total Sewage	contig-75_1018_4	Aminocoumarin	17	108	68
Total Sewage	contig-75_1018_4	Aminocoumarin	17	108	68
Total Sewage	contig-75_1018_4	Aminocoumarin	17	108	68
Total Sewage	contig-75_1018_4	Aminoglycosides	17	108	68
Total Sewage	contig-75_1018_4	Aminoglycosides	17	108	68
Total Sewage	contig-75_1018_4	Aminoglycosides	17	108	68
Total Sewage	contig-75_1018_5	Beta Lactams	16	135	73
Total Sewage	contig-75_1018_5	Beta Lactams	16	135	73
Total Sewage	contig-75_1018_5	Beta Lactams	16	135	73
Total Sewage	contig-75_1018_5	Fluoroquinolones	16	135	73
Total Sewage	contig-75_1018_5	Fluoroquinolones	16	135	73
Total Sewage	contig-75_1018_5	Fluoroquinolones	16	135	73
Total Sewage	contig-75_1018_5	Macrolide	16	135	73
Total Sewage	contig-75_1018_5	Macrolide	16	135	73
Total Sewage	contig-75_1018_5	Macrolide	16	135	73
Total Sewage	contig-75_1018_5	Tetracycline	16	135	73
Total Sewage	contig-75_1018_5	Tetracycline	16	135	73
Total Sewage	contig-75_1018_5	Tetracycline	16	135	73
Total Sewage	contig-75_10195_2	Lincosamide	12	69	92
Total Sewage	contig-75_10195_2	Lincosamide	12	69	92
Total Sewage	contig-75_10195_2	Lincosamide	12	69	92
Total Sewage	contig-75_102_14	Aminocoumarin	761	258	349
Total Sewage	contig-75_102_14	Aminocoumarin	761	258	349
Total Sewage	contig-75_102_14	Aminocoumarin	761	258	349
Total Sewage	contig-75_102_14	Beta Lactams	761	258	349
Total Sewage	contig-75_102_14	Beta Lactams	761	258	349
Total Sewage	contig-75_102_14	Beta Lactams	761	258	349
Total Sewage	contig-75_102_14	Chloramphenicol	761	258	349
Total Sewage	contig-75_102_14	Chloramphenicol	761	258	349
Total Sewage	contig-75_102_14	Chloramphenicol	761	258	349
Total Sewage	contig-75_102_14	Fluoroquinolones	761	258	349
Total Sewage	contig-75_102_14	Fluoroquinolones	761	258	349
Total Sewage	contig-75_102_14	Fluoroquinolones	761	258	349
Total Sewage	contig-75_102_14	Lincosamide	761	258	349
Total Sewage	contig-75_102_14	Lincosamide	761	258	349
Total Sewage	contig-75_102_14	Lincosamide	761	258	349
Total Sewage	contig-75_102_14	Macrolide	761	258	349
Total Sewage	contig-75_102_14	Macrolide	761	258	349
Total Sewage	contig-75_102_14	Macrolide	761	258	349
Total Sewage	contig-75_102_14	Tetracycline	761	258	349
Total Sewage	contig-75_102_14	Tetracycline	761	258	349
Total Sewage	contig-75_102_14	Tetracycline	761	258	349
Total Sewage	contig-75_1023_1	Sulfonamide	13	0	0
Total Sewage	contig-75_1023_1	Sulfonamide	13	0	0
Total Sewage	contig-75_1023_1	Sulfonamide	13	0	0
Total Sewage	contig-75_10237_1	Beta Lactams	10	13	15
Total Sewage	contig-75_10237_1	Beta Lactams	10	13	15
Total Sewage	contig-75_10237_1	Beta Lactams	10	13	15
Total Sewage	contig-75_1024_1	Aminocoumarin	20	29	35
Total Sewage	contig-75_1024_1	Aminocoumarin	20	29	35
Total Sewage	contig-75_1024_1	Aminocoumarin	20	29	35
Total Sewage	contig-75_1024_2	Erythromycin	13	16	0
Total Sewage	contig-75_1024_2	Erythromycin	13	16	0
Total Sewage	contig-75_1024_2	Erythromycin	13	16	0
Total Sewage	contig-75_1024_2	Tetracycline	13	16	0
Total Sewage	contig-75_1024_2	Tetracycline	13	16	0
Total Sewage	contig-75_1024_2	Tetracycline	13	16	0
Total Sewage	contig-75_1024_2	Triclosan	13	16	0
Total Sewage	contig-75_1024_2	Triclosan	13	16	0
Total Sewage	contig-75_1024_2	Triclosan	13	16	0
Total Sewage	contig-75_1024_5	Tigecycline	0	0	0
Total Sewage	contig-75_1024_5	Tigecycline	0	0	0
Total Sewage	contig-75_1024_5	Tigecycline	0	0	0
Total Sewage	contig-75_10247_3	Aminocoumarin	49	80	93
Total Sewage	contig-75_10247_3	Aminocoumarin	49	80	93
Total Sewage	contig-75_10247_3	Aminocoumarin	49	80	93
Total Sewage	contig-75_10247_3	Aminoglycosides	49	80	93
Total Sewage	contig-75_10247_3	Aminoglycosides	49	80	93
Total Sewage	contig-75_10247_3	Aminoglycosides	49	80	93
Total Sewage	contig-75_10261_1	Ciprofloxacin	25	13	22
Total Sewage	contig-75_10261_1	Ciprofloxacin	25	13	22
Total Sewage	contig-75_10261_1	Ciprofloxacin	25	13	22
Total Sewage	contig-75_10261_1	Norfloxacin	25	13	22
Total Sewage	contig-75_10261_1	Norfloxacin	25	13	22
Total Sewage	contig-75_10261_1	Norfloxacin	25	13	22
Total Sewage	contig-75_10264_2	Macrolide	0	68	79
Total Sewage	contig-75_10264_2	Macrolide	0	68	79
Total Sewage	contig-75_10264_2	Macrolide	0	68	79
Total Sewage	contig-75_10279_1	Elfamycin	2245	2638	2226
Total Sewage	contig-75_10279_1	Elfamycin	2245	2638	2226
Total Sewage	contig-75_10279_1	Elfamycin	2245	2638	2226
Total Sewage	contig-75_1029_3	Tetracycline	16	58	56
Total Sewage	contig-75_1029_3	Tetracycline	16	58	56
Total Sewage	contig-75_1029_3	Tetracycline	16	58	56
Total Sewage	contig-75_10292_2	Ciprofloxacin	139	130	117
Total Sewage	contig-75_10292_2	Ciprofloxacin	139	130	117
Total Sewage	contig-75_10292_2	Ciprofloxacin	139	130	117
Total Sewage	contig-75_10292_2	Norfloxacin	139	130	117
Total Sewage	contig-75_10292_2	Norfloxacin	139	130	117
Total Sewage	contig-75_10292_2	Norfloxacin	139	130	117
Total Sewage	contig-75_10294_1	Elfamycin	2443	11183	10489
Total Sewage	contig-75_10294_1	Elfamycin	2443	11183	10489
Total Sewage	contig-75_10294_1	Elfamycin	2443	11183	10489
Total Sewage	contig-75_10299_2	Macrolide	0	0	0
Total Sewage	contig-75_10299_2	Macrolide	0	0	0
Total Sewage	contig-75_10299_2	Macrolide	0	0	0
Total Sewage	contig-75_103_7	Aminocoumarin	161	178	170
Total Sewage	contig-75_103_7	Aminocoumarin	161	178	170
Total Sewage	contig-75_103_7	Aminocoumarin	161	178	170
Total Sewage	contig-75_10302_1	Beta Lactams	13	37	34
Total Sewage	contig-75_10302_1	Beta Lactams	13	37	34
Total Sewage	contig-75_10302_1	Beta Lactams	13	37	34
Total Sewage	contig-75_10314_1	Lincosamide	14	108	56
Total Sewage	contig-75_10314_1	Lincosamide	14	108	56
Total Sewage	contig-75_10314_1	Lincosamide	14	108	56
Total Sewage	contig-75_10314_1	Macrolide	14	108	56
Total Sewage	contig-75_10314_1	Macrolide	14	108	56
Total Sewage	contig-75_10314_1	Macrolide	14	108	56
Total Sewage	contig-75_10314_1	Streptogramin	14	108	56
Total Sewage	contig-75_10314_1	Streptogramin	14	108	56
Total Sewage	contig-75_10314_1	Streptogramin	14	108	56
Total Sewage	contig-75_10317_1	Lincosamide	19	0	15
Total Sewage	contig-75_10317_1	Lincosamide	19	0	15
Total Sewage	contig-75_10317_1	Lincosamide	19	0	15
Total Sewage	contig-75_10320_1	Elfamycin	11190	11656	16029
Total Sewage	contig-75_10320_1	Elfamycin	11190	11656	16029
Total Sewage	contig-75_10320_1	Elfamycin	11190	11656	16029
Total Sewage	contig-75_1034_4	Macrolide	53	21	25
Total Sewage	contig-75_1034_4	Macrolide	53	21	25
Total Sewage	contig-75_1034_4	Macrolide	53	21	25
Total Sewage	contig-75_1035_7	Rifampin	196	341	352
Total Sewage	contig-75_1035_7	Rifampin	196	341	352
Total Sewage	contig-75_1035_7	Rifampin	196	341	352
Total Sewage	contig-75_10364_2	Streptogramin	53	29	16
Total Sewage	contig-75_10364_2	Streptogramin	53	29	16
Total Sewage	contig-75_10364_2	Streptogramin	53	29	16
Total Sewage	contig-75_10367_1	Tetracycline	0	0	0
Total Sewage	contig-75_10367_1	Tetracycline	0	0	0
Total Sewage	contig-75_10367_1	Tetracycline	0	0	0
Total Sewage	contig-75_10367_1	Tigecycline	0	0	0
Total Sewage	contig-75_10367_1	Tigecycline	0	0	0
Total Sewage	contig-75_10367_1	Tigecycline	0	0	0
Total Sewage	contig-75_1038_5	Aminocoumarin	0	17	0
Total Sewage	contig-75_1038_5	Aminocoumarin	0	17	0
Total Sewage	contig-75_1038_5	Aminocoumarin	0	17	0
Total Sewage	contig-75_1038_5	Aminoglycosides	0	17	0
Total Sewage	contig-75_1038_5	Aminoglycosides	0	17	0
Total Sewage	contig-75_1038_5	Aminoglycosides	0	17	0
Total Sewage	contig-75_1038_6	Vancomycin	23	25	15
Total Sewage	contig-75_1038_6	Vancomycin	23	25	15
Total Sewage	contig-75_1038_6	Vancomycin	23	25	15
Total Sewage	contig-75_10382_1	Macrolide	0	0	0
Total Sewage	contig-75_10382_1	Macrolide	0	0	0
Total Sewage	contig-75_10382_1	Macrolide	0	0	0
Total Sewage	contig-75_1040_5	Macrolide	19	0	21
Total Sewage	contig-75_1040_5	Macrolide	19	0	21
Total Sewage	contig-75_1040_5	Macrolide	19	0	21
Total Sewage	contig-75_1040_5	Polymyxin	19	0	21
Total Sewage	contig-75_1040_5	Polymyxin	19	0	21
Total Sewage	contig-75_1040_5	Polymyxin	19	0	21
Total Sewage	contig-75_10404_1	Chloramphenicol	122	201	183
Total Sewage	contig-75_10404_1	Chloramphenicol	122	201	183
Total Sewage	contig-75_10404_1	Chloramphenicol	122	201	183
Total Sewage	contig-75_10419_2	Mupirocin	784	1894	1778
Total Sewage	contig-75_10419_2	Mupirocin	784	1894	1778
Total Sewage	contig-75_10419_2	Mupirocin	784	1894	1778
Total Sewage	contig-75_1042_4	Aminocoumarin	15	13	12
Total Sewage	contig-75_1042_4	Aminocoumarin	15	13	12
Total Sewage	contig-75_1042_4	Aminocoumarin	15	13	12
Total Sewage	contig-75_10421_1	Streptogramin	16	63	46
Total Sewage	contig-75_10421_1	Streptogramin	16	63	46
Total Sewage	contig-75_10421_1	Streptogramin	16	63	46
Total Sewage	contig-75_10444_2	Beta Lactams	294	518	470
Total Sewage	contig-75_10444_2	Beta Lactams	294	518	470
Total Sewage	contig-75_10444_2	Beta Lactams	294	518	470
Total Sewage	contig-75_1045_3	Lincosamide	0	14	0
Total Sewage	contig-75_1045_3	Lincosamide	0	14	0
Total Sewage	contig-75_1045_3	Lincosamide	0	14	0
Total Sewage	contig-75_1045_3	Streptogramin	0	14	0
Total Sewage	contig-75_1045_3	Streptogramin	0	14	0
Total Sewage	contig-75_1045_3	Streptogramin	0	14	0
Total Sewage	contig-75_1047_2	Aminoglycosides	0	0	0
Total Sewage	contig-75_1047_2	Aminoglycosides	0	0	0
Total Sewage	contig-75_1047_2	Aminoglycosides	0	0	0
Total Sewage	contig-75_10473_3	Macrolide	110	565	485
Total Sewage	contig-75_10473_3	Macrolide	110	565	485
Total Sewage	contig-75_10473_3	Macrolide	110	565	485
Total Sewage	contig-75_10474_2	Macrolide	318	313	299
Total Sewage	contig-75_10474_2	Macrolide	318	313	299
Total Sewage	contig-75_10474_2	Macrolide	318	313	299
Total Sewage	contig-75_1049_1	Fosfomycin	142	548	357
Total Sewage	contig-75_1049_1	Fosfomycin	142	548	357
Total Sewage	contig-75_1049_1	Fosfomycin	142	548	357
Total Sewage	contig-75_10501_2	Aminoglycosides	210	259	226
Total Sewage	contig-75_10501_2	Aminoglycosides	210	259	226
Total Sewage	contig-75_10501_2	Aminoglycosides	210	259	226
Total Sewage	contig-75_10501_2	Beta Lactams	210	259	226
Total Sewage	contig-75_10501_2	Beta Lactams	210	259	226
Total Sewage	contig-75_10501_2	Beta Lactams	210	259	226
Total Sewage	contig-75_10501_2	Fluoroquinolones	210	259	226
Total Sewage	contig-75_10501_2	Fluoroquinolones	210	259	226
Total Sewage	contig-75_10501_2	Fluoroquinolones	210	259	226
Total Sewage	contig-75_10501_2	Tetracycline	210	259	226
Total Sewage	contig-75_10501_2	Tetracycline	210	259	226
Total Sewage	contig-75_10501_2	Tetracycline	210	259	226
Total Sewage	contig-75_10501_2	Tigecycline	210	259	226
Total Sewage	contig-75_10501_2	Tigecycline	210	259	226
Total Sewage	contig-75_10501_2	Tigecycline	210	259	226
Total Sewage	contig-75_1052_3	Macrolide	21	0	14
Total Sewage	contig-75_1052_3	Macrolide	21	0	14
Total Sewage	contig-75_1052_3	Macrolide	21	0	14
Total Sewage	contig-75_10523_2	Lincomycin	0	0	0
Total Sewage	contig-75_10523_2	Lincomycin	0	0	0
Total Sewage	contig-75_10523_2	Lincomycin	0	0	0
Total Sewage	contig-75_10543_1	Vancomycin	22	0	10
Total Sewage	contig-75_10543_1	Vancomycin	22	0	10
Total Sewage	contig-75_10543_1	Vancomycin	22	0	10
Total Sewage	contig-75_10546_1	Tetracycline	0	0	0
Total Sewage	contig-75_10546_1	Tetracycline	0	0	0
Total Sewage	contig-75_10546_1	Tetracycline	0	0	0
Total Sewage	contig-75_1055_2	Teicoplanin	48	82	60
Total Sewage	contig-75_1055_2	Teicoplanin	48	82	60
Total Sewage	contig-75_1055_2	Teicoplanin	48	82	60
Total Sewage	contig-75_1055_2	Vancomycin	48	82	60
Total Sewage	contig-75_1055_2	Vancomycin	48	82	60
Total Sewage	contig-75_1055_2	Vancomycin	48	82	60
Total Sewage	contig-75_1055_5	Macrolide	11	10	15
Total Sewage	contig-75_1055_5	Macrolide	11	10	15
Total Sewage	contig-75_1055_5	Macrolide	11	10	15
Total Sewage	contig-75_10565_1	Mupirocin	310	298	228
Total Sewage	contig-75_10565_1	Mupirocin	310	298	228
Total Sewage	contig-75_10565_1	Mupirocin	310	298	228
Total Sewage	contig-75_10568_1	Aminocoumarin	856	1273	1737
Total Sewage	contig-75_10568_1	Aminocoumarin	856	1273	1737
Total Sewage	contig-75_10568_1	Aminocoumarin	856	1273	1737
Total Sewage	contig-75_1058_4	Macrolide	15	21	18
Total Sewage	contig-75_1058_4	Macrolide	15	21	18
Total Sewage	contig-75_1058_4	Macrolide	15	21	18
Total Sewage	contig-75_106_13	Isoniazid	552	367	456
Total Sewage	contig-75_106_13	Isoniazid	552	367	456
Total Sewage	contig-75_106_13	Isoniazid	552	367	456
Total Sewage	contig-75_106_6	Tetracycline	61	40	104
Total Sewage	contig-75_106_6	Tetracycline	61	40	104
Total Sewage	contig-75_106_6	Tetracycline	61	40	104
Total Sewage	contig-75_10600_3	Chloramphenicol	232	830	870
Total Sewage	contig-75_10600_3	Chloramphenicol	232	830	870
Total Sewage	contig-75_10600_3	Chloramphenicol	232	830	870
Total Sewage	contig-75_10600_3	Lincosamide	232	830	870
Total Sewage	contig-75_10600_3	Lincosamide	232	830	870
Total Sewage	contig-75_10600_3	Lincosamide	232	830	870
Total Sewage	contig-75_10600_3	Macrolide	232	830	870
Total Sewage	contig-75_10600_3	Macrolide	232	830	870
Total Sewage	contig-75_10600_3	Macrolide	232	830	870
Total Sewage	contig-75_10600_3	Streptogramin	232	830	870
Total Sewage	contig-75_10600_3	Streptogramin	232	830	870
Total Sewage	contig-75_10600_3	Streptogramin	232	830	870
Total Sewage	contig-75_1061_3	Vancomycin	12	33	31
Total Sewage	contig-75_1061_3	Vancomycin	12	33	31
Total Sewage	contig-75_1061_3	Vancomycin	12	33	31
Total Sewage	contig-75_10626_1	Erythromycin	0	0	0
Total Sewage	contig-75_10626_1	Erythromycin	0	0	0
Total Sewage	contig-75_10626_1	Erythromycin	0	0	0
Total Sewage	contig-75_10626_1	Tetracycline	0	0	0
Total Sewage	contig-75_10626_1	Tetracycline	0	0	0
Total Sewage	contig-75_10626_1	Tetracycline	0	0	0
Total Sewage	contig-75_10626_1	Triclosan	0	0	0
Total Sewage	contig-75_10626_1	Triclosan	0	0	0
Total Sewage	contig-75_10626_1	Triclosan	0	0	0
Total Sewage	contig-75_10650_2	Sulfonamide	986	217	237
Total Sewage	contig-75_10650_2	Sulfonamide	986	217	237
Total Sewage	contig-75_10650_2	Sulfonamide	986	217	237
Total Sewage	contig-75_10659_2	Thiostrepton	71	226	243
Total Sewage	contig-75_10659_2	Thiostrepton	71	226	243
Total Sewage	contig-75_10659_2	Thiostrepton	71	226	243
Total Sewage	contig-75_10664_2	Bacitracin	41	116	89
Total Sewage	contig-75_10664_2	Bacitracin	41	116	89
Total Sewage	contig-75_10664_2	Bacitracin	41	116	89
Total Sewage	contig-75_1067_4	Penicillin	406	597	608
Total Sewage	contig-75_1067_4	Penicillin	406	597	608
Total Sewage	contig-75_1067_4	Penicillin	406	597	608
Total Sewage	contig-75_1067_5	Macrolide	65	70	87
Total Sewage	contig-75_1067_5	Macrolide	65	70	87
Total Sewage	contig-75_1067_5	Macrolide	65	70	87
Total Sewage	contig-75_10679_1	Teicoplanin	15	10	19
Total Sewage	contig-75_10679_1	Teicoplanin	15	10	19
Total Sewage	contig-75_10679_1	Teicoplanin	15	10	19
Total Sewage	contig-75_10679_1	Vancomycin	15	10	19
Total Sewage	contig-75_10679_1	Vancomycin	15	10	19
Total Sewage	contig-75_10679_1	Vancomycin	15	10	19
Total Sewage	contig-75_1070_4	Bacitracin	0	0	0
Total Sewage	contig-75_1070_4	Bacitracin	0	0	0
Total Sewage	contig-75_1070_4	Bacitracin	0	0	0
Total Sewage	contig-75_10709_2	Bacitracin	1024	2088	1920
Total Sewage	contig-75_10709_2	Bacitracin	1024	2088	1920
Total Sewage	contig-75_10709_2	Bacitracin	1024	2088	1920
Total Sewage	contig-75_10715_1	Polymyxin	271	272	317
Total Sewage	contig-75_10715_1	Polymyxin	271	272	317
Total Sewage	contig-75_10715_1	Polymyxin	271	272	317
Total Sewage	contig-75_10724_1	Macrolide	26	0	0
Total Sewage	contig-75_10724_1	Macrolide	26	0	0
Total Sewage	contig-75_10724_1	Macrolide	26	0	0
Total Sewage	contig-75_1073_3	Fluoroquinolones	88	166	182
Total Sewage	contig-75_1073_3	Fluoroquinolones	88	166	182
Total Sewage	contig-75_1073_3	Fluoroquinolones	88	166	182
Total Sewage	contig-75_10731_2	Thiostrepton	585	1229	1199
Total Sewage	contig-75_10731_2	Thiostrepton	585	1229	1199
Total Sewage	contig-75_10731_2	Thiostrepton	585	1229	1199
Total Sewage	contig-75_1079_1	Polymyxin	0	16	17
Total Sewage	contig-75_1079_1	Polymyxin	0	16	17
Total Sewage	contig-75_1079_1	Polymyxin	0	16	17
Total Sewage	contig-75_10791_1	Teicoplanin	78	94	70
Total Sewage	contig-75_10791_1	Teicoplanin	78	94	70
Total Sewage	contig-75_10791_1	Teicoplanin	78	94	70
Total Sewage	contig-75_10791_1	Vancomycin	78	94	70
Total Sewage	contig-75_10791_1	Vancomycin	78	94	70
Total Sewage	contig-75_10791_1	Vancomycin	78	94	70
Total Sewage	contig-75_10796_1	Macrolide	0	0	0
Total Sewage	contig-75_10796_1	Macrolide	0	0	0
Total Sewage	contig-75_10796_1	Macrolide	0	0	0
Total Sewage	contig-75_10796_2	Bacitracin	0	0	0
Total Sewage	contig-75_10796_2	Bacitracin	0	0	0
Total Sewage	contig-75_10796_2	Bacitracin	0	0	0
Total Sewage	contig-75_108_12	Acriflavine	31	18	27
Total Sewage	contig-75_108_12	Acriflavine	31	18	27
Total Sewage	contig-75_108_12	Acriflavine	31	18	27
Total Sewage	contig-75_108_12	Aminoglycosides	31	18	27
Total Sewage	contig-75_108_12	Aminoglycosides	31	18	27
Total Sewage	contig-75_108_12	Aminoglycosides	31	18	27
Total Sewage	contig-75_108_12	Macrolide	31	18	27
Total Sewage	contig-75_108_12	Macrolide	31	18	27
Total Sewage	contig-75_108_12	Macrolide	31	18	27
Total Sewage	contig-75_108_14	Aminocoumarin	38	29	63
Total Sewage	contig-75_108_14	Aminocoumarin	38	29	63
Total Sewage	contig-75_108_14	Aminocoumarin	38	29	63
Total Sewage	contig-75_108_8	Polymyxin	22	24	48
Total Sewage	contig-75_108_8	Polymyxin	22	24	48
Total Sewage	contig-75_108_8	Polymyxin	22	24	48
Total Sewage	contig-75_10804_1	Triclosan	15	18	18
Total Sewage	contig-75_10804_1	Triclosan	15	18	18
Total Sewage	contig-75_10804_1	Triclosan	15	18	18
Total Sewage	contig-75_10810_2	Aminocoumarin	0	0	0
Total Sewage	contig-75_10810_2	Aminocoumarin	0	0	0
Total Sewage	contig-75_10810_2	Aminocoumarin	0	0	0
Total Sewage	contig-75_10810_2	Beta Lactams	0	0	0
Total Sewage	contig-75_10810_2	Beta Lactams	0	0	0
Total Sewage	contig-75_10810_2	Beta Lactams	0	0	0
Total Sewage	contig-75_10810_2	Chloramphenicol	0	0	0
Total Sewage	contig-75_10810_2	Chloramphenicol	0	0	0
Total Sewage	contig-75_10810_2	Chloramphenicol	0	0	0
Total Sewage	contig-75_10810_2	Fluoroquinolones	0	0	0
Total Sewage	contig-75_10810_2	Fluoroquinolones	0	0	0
Total Sewage	contig-75_10810_2	Fluoroquinolones	0	0	0
Total Sewage	contig-75_10810_2	Lincosamide	0	0	0
Total Sewage	contig-75_10810_2	Lincosamide	0	0	0
Total Sewage	contig-75_10810_2	Lincosamide	0	0	0
Total Sewage	contig-75_10810_2	Macrolide	0	0	0
Total Sewage	contig-75_10810_2	Macrolide	0	0	0
Total Sewage	contig-75_10810_2	Macrolide	0	0	0
Total Sewage	contig-75_10810_2	Tetracycline	0	0	0
Total Sewage	contig-75_10810_2	Tetracycline	0	0	0
Total Sewage	contig-75_10810_2	Tetracycline	0	0	0
Total Sewage	contig-75_10816_1	Elfamycin	2341	4530	6247
Total Sewage	contig-75_10816_1	Elfamycin	2341	4530	6247
Total Sewage	contig-75_10816_1	Elfamycin	2341	4530	6247
Total Sewage	contig-75_1082_9	Chloramphenicol	15	21	33
Total Sewage	contig-75_1082_9	Chloramphenicol	15	21	33
Total Sewage	contig-75_1082_9	Chloramphenicol	15	21	33
Total Sewage	contig-75_10829_1	Macrolide	64	150	160
Total Sewage	contig-75_10829_1	Macrolide	64	150	160
Total Sewage	contig-75_10829_1	Macrolide	64	150	160
Total Sewage	contig-75_10830_2	Thiostrepton	53	338	297
Total Sewage	contig-75_10830_2	Thiostrepton	53	338	297
Total Sewage	contig-75_10830_2	Thiostrepton	53	338	297
Total Sewage	contig-75_10842_1	Polymyxin	115	37	59
Total Sewage	contig-75_10842_1	Polymyxin	115	37	59
Total Sewage	contig-75_10842_1	Polymyxin	115	37	59
Total Sewage	contig-75_1087_1	Beta Lactams	0	0	0
Total Sewage	contig-75_1087_1	Beta Lactams	0	0	0
Total Sewage	contig-75_1087_1	Beta Lactams	0	0	0
Total Sewage	contig-75_10876_1	Mupirocin	0	18	19
Total Sewage	contig-75_10876_1	Mupirocin	0	18	19
Total Sewage	contig-75_10876_1	Mupirocin	0	18	19
Total Sewage	contig-75_1088_2	Penicillin	49	192	139
Total Sewage	contig-75_1088_2	Penicillin	49	192	139
Total Sewage	contig-75_1088_2	Penicillin	49	192	139
Total Sewage	contig-75_1088_5	Bacitracin	170	138	125
Total Sewage	contig-75_1088_5	Bacitracin	170	138	125
Total Sewage	contig-75_1088_5	Bacitracin	170	138	125
Total Sewage	contig-75_10889_2	Aminoglycosides	35	60	52
Total Sewage	contig-75_10889_2	Aminoglycosides	35	60	52
Total Sewage	contig-75_10889_2	Aminoglycosides	35	60	52
Total Sewage	contig-75_10889_2	Kanamycin	35	60	52
Total Sewage	contig-75_10889_2	Kanamycin	35	60	52
Total Sewage	contig-75_10889_2	Kanamycin	35	60	52
Total Sewage	contig-75_109_1	Polymyxin	48	48	64
Total Sewage	contig-75_109_1	Polymyxin	48	48	64
Total Sewage	contig-75_109_1	Polymyxin	48	48	64
Total Sewage	contig-75_109_18	Bacitracin	0	0	12
Total Sewage	contig-75_109_18	Bacitracin	0	0	12
Total Sewage	contig-75_109_18	Bacitracin	0	0	12
Total Sewage	contig-75_109_4	Beta Lactams	65	103	83
Total Sewage	contig-75_109_4	Beta Lactams	65	103	83
Total Sewage	contig-75_109_4	Beta Lactams	65	103	83
Total Sewage	contig-75_109_4	Fluoroquinolones	65	103	83
Total Sewage	contig-75_109_4	Fluoroquinolones	65	103	83
Total Sewage	contig-75_109_4	Fluoroquinolones	65	103	83
Total Sewage	contig-75_109_4	Macrolide	65	103	83
Total Sewage	contig-75_109_4	Macrolide	65	103	83
Total Sewage	contig-75_109_4	Macrolide	65	103	83
Total Sewage	contig-75_109_4	Tetracycline	65	103	83
Total Sewage	contig-75_109_4	Tetracycline	65	103	83
Total Sewage	contig-75_109_4	Tetracycline	65	103	83
Total Sewage	contig-75_109_5	Teicoplanin	150	152	153
Total Sewage	contig-75_109_5	Teicoplanin	150	152	153
Total Sewage	contig-75_109_5	Teicoplanin	150	152	153
Total Sewage	contig-75_109_5	Vancomycin	150	152	153
Total Sewage	contig-75_109_5	Vancomycin	150	152	153
Total Sewage	contig-75_109_5	Vancomycin	150	152	153
Total Sewage	contig-75_1090_3	Vancomycin	255	215	332
Total Sewage	contig-75_1090_3	Vancomycin	255	215	332
Total Sewage	contig-75_1090_3	Vancomycin	255	215	332
Total Sewage	contig-75_10912_1	Tetracycline	0	16	15
Total Sewage	contig-75_10912_1	Tetracycline	0	16	15
Total Sewage	contig-75_10912_1	Tetracycline	0	16	15
Total Sewage	contig-75_1092_1	Penicillin	80	55	61
Total Sewage	contig-75_1092_1	Penicillin	80	55	61
Total Sewage	contig-75_1092_1	Penicillin	80	55	61
Total Sewage	contig-75_10936_2	Beta Lactams	0	12	0
Total Sewage	contig-75_10936_2	Beta Lactams	0	12	0
Total Sewage	contig-75_10936_2	Beta Lactams	0	12	0
Total Sewage	contig-75_10936_2	Fluoroquinolones	0	12	0
Total Sewage	contig-75_10936_2	Fluoroquinolones	0	12	0
Total Sewage	contig-75_10936_2	Fluoroquinolones	0	12	0
Total Sewage	contig-75_10936_2	Macrolide	0	12	0
Total Sewage	contig-75_10936_2	Macrolide	0	12	0
Total Sewage	contig-75_10936_2	Macrolide	0	12	0
Total Sewage	contig-75_10936_2	Tetracycline	0	12	0
Total Sewage	contig-75_10936_2	Tetracycline	0	12	0
Total Sewage	contig-75_10936_2	Tetracycline	0	12	0
Total Sewage	contig-75_10966_1	Macrolide	0	17	18
Total Sewage	contig-75_10966_1	Macrolide	0	17	18
Total Sewage	contig-75_10966_1	Macrolide	0	17	18
Total Sewage	contig-75_10966_2	Macrolide	0	21	26
Total Sewage	contig-75_10966_2	Macrolide	0	21	26
Total Sewage	contig-75_10966_2	Macrolide	0	21	26
Total Sewage	contig-75_1097_3	Penicillin	100	179	361
Total Sewage	contig-75_1097_3	Penicillin	100	179	361
Total Sewage	contig-75_1097_3	Penicillin	100	179	361
Total Sewage	contig-75_10972_1	Macrolide	41	34	33
Total Sewage	contig-75_10972_1	Macrolide	41	34	33
Total Sewage	contig-75_10972_1	Macrolide	41	34	33
Total Sewage	contig-75_1099_5	Vancomycin	11	0	35
Total Sewage	contig-75_1099_5	Vancomycin	11	0	35
Total Sewage	contig-75_1099_5	Vancomycin	11	0	35
Total Sewage	contig-75_11_2	Aminocoumarin	0	27	39
Total Sewage	contig-75_11_2	Aminocoumarin	0	27	39
Total Sewage	contig-75_11_2	Aminocoumarin	0	27	39
Total Sewage	contig-75_11_2	Aminoglycosides	0	27	39
Total Sewage	contig-75_11_2	Aminoglycosides	0	27	39
Total Sewage	contig-75_11_2	Aminoglycosides	0	27	39
Total Sewage	contig-75_11_26	Tetracycline	50	280	220
Total Sewage	contig-75_11_26	Tetracycline	50	280	220
Total Sewage	contig-75_11_26	Tetracycline	50	280	220
Total Sewage	contig-75_11_26	Tigecycline	50	280	220
Total Sewage	contig-75_11_26	Tigecycline	50	280	220
Total Sewage	contig-75_11_26	Tigecycline	50	280	220
Total Sewage	contig-75_11_6	Teicoplanin	0	0	0
Total Sewage	contig-75_11_6	Teicoplanin	0	0	0
Total Sewage	contig-75_11_6	Teicoplanin	0	0	0
Total Sewage	contig-75_11_6	Vancomycin	0	0	0
Total Sewage	contig-75_11_6	Vancomycin	0	0	0
Total Sewage	contig-75_11_6	Vancomycin	0	0	0
Total Sewage	contig-75_11022_2	Bacitracin	109	151	188
Total Sewage	contig-75_11022_2	Bacitracin	109	151	188
Total Sewage	contig-75_11022_2	Bacitracin	109	151	188
Total Sewage	contig-75_11026_4	Erythromycin	567	137	188
Total Sewage	contig-75_11026_4	Erythromycin	567	137	188
Total Sewage	contig-75_11026_4	Erythromycin	567	137	188
Total Sewage	contig-75_11026_4	Tetracycline	567	137	188
Total Sewage	contig-75_11026_4	Tetracycline	567	137	188
Total Sewage	contig-75_11026_4	Tetracycline	567	137	188
Total Sewage	contig-75_11026_4	Triclosan	567	137	188
Total Sewage	contig-75_11026_4	Triclosan	567	137	188
Total Sewage	contig-75_11026_4	Triclosan	567	137	188
Total Sewage	contig-75_11041_1	Beta Lactams	110	249	181
Total Sewage	contig-75_11041_1	Beta Lactams	110	249	181
Total Sewage	contig-75_11041_1	Beta Lactams	110	249	181
Total Sewage	contig-75_11045_1	Macrolide	0	0	0
Total Sewage	contig-75_11045_1	Macrolide	0	0	0
Total Sewage	contig-75_11045_1	Macrolide	0	0	0
Total Sewage	contig-75_11046_2	Teicoplanin	0	0	0
Total Sewage	contig-75_11046_2	Teicoplanin	0	0	0
Total Sewage	contig-75_11046_2	Teicoplanin	0	0	0
Total Sewage	contig-75_11046_2	Vancomycin	0	0	0
Total Sewage	contig-75_11046_2	Vancomycin	0	0	0
Total Sewage	contig-75_11046_2	Vancomycin	0	0	0
Total Sewage	contig-75_11047_1	Tetracycline	0	0	0
Total Sewage	contig-75_11047_1	Tetracycline	0	0	0
Total Sewage	contig-75_11047_1	Tetracycline	0	0	0
Total Sewage	contig-75_11058_1	Macrolide	79	138	167
Total Sewage	contig-75_11058_1	Macrolide	79	138	167
Total Sewage	contig-75_11058_1	Macrolide	79	138	167
Total Sewage	contig-75_1107_4	Macrolide	77	73	73
Total Sewage	contig-75_1107_4	Macrolide	77	73	73
Total Sewage	contig-75_1107_4	Macrolide	77	73	73
Total Sewage	contig-75_1107_4	Polymyxin	77	73	73
Total Sewage	contig-75_1107_4	Polymyxin	77	73	73
Total Sewage	contig-75_1107_4	Polymyxin	77	73	73
Total Sewage	contig-75_1107_5	Ciprofloxacin	46	179	168
Total Sewage	contig-75_1107_5	Ciprofloxacin	46	179	168
Total Sewage	contig-75_1107_5	Ciprofloxacin	46	179	168
Total Sewage	contig-75_1107_5	Norfloxacin	46	179	168
Total Sewage	contig-75_1107_5	Norfloxacin	46	179	168
Total Sewage	contig-75_1107_5	Norfloxacin	46	179	168
Total Sewage	contig-75_11070_1	Aminoglycosides	28	462	211
Total Sewage	contig-75_11070_1	Aminoglycosides	28	462	211
Total Sewage	contig-75_11070_1	Aminoglycosides	28	462	211
Total Sewage	contig-75_11070_1	Kanamycin	28	462	211
Total Sewage	contig-75_11070_1	Kanamycin	28	462	211
Total Sewage	contig-75_11070_1	Kanamycin	28	462	211
Total Sewage	contig-75_1109_3	Aminoglycosides	605	688	926
Total Sewage	contig-75_1109_3	Aminoglycosides	605	688	926
Total Sewage	contig-75_1109_3	Aminoglycosides	605	688	926
Total Sewage	contig-75_1109_3	Beta Lactams	605	688	926
Total Sewage	contig-75_1109_3	Beta Lactams	605	688	926
Total Sewage	contig-75_1109_3	Beta Lactams	605	688	926
Total Sewage	contig-75_1109_3	Fluoroquinolones	605	688	926
Total Sewage	contig-75_1109_3	Fluoroquinolones	605	688	926
Total Sewage	contig-75_1109_3	Fluoroquinolones	605	688	926
Total Sewage	contig-75_1109_4	Aminocoumarin	218	403	487
Total Sewage	contig-75_1109_4	Aminocoumarin	218	403	487
Total Sewage	contig-75_1109_4	Aminocoumarin	218	403	487
Total Sewage	contig-75_1109_4	Aminoglycosides	218	403	487
Total Sewage	contig-75_1109_4	Aminoglycosides	218	403	487
Total Sewage	contig-75_1109_4	Aminoglycosides	218	403	487
Total Sewage	contig-75_1109_5	Tetracycline	495	233	374
Total Sewage	contig-75_1109_5	Tetracycline	495	233	374
Total Sewage	contig-75_1109_5	Tetracycline	495	233	374
Total Sewage	contig-75_11131_1	Aminocoumarin	62	213	177
Total Sewage	contig-75_11131_1	Aminocoumarin	62	213	177
Total Sewage	contig-75_11131_1	Aminocoumarin	62	213	177
Total Sewage	contig-75_11131_1	Aminoglycosides	62	213	177
Total Sewage	contig-75_11131_1	Aminoglycosides	62	213	177
Total Sewage	contig-75_11131_1	Aminoglycosides	62	213	177
Total Sewage	contig-75_11138_2	Polymyxin	25	143	89
Total Sewage	contig-75_11138_2	Polymyxin	25	143	89
Total Sewage	contig-75_11138_2	Polymyxin	25	143	89
Total Sewage	contig-75_11151_1	Aminocoumarin	341	155	186
Total Sewage	contig-75_11151_1	Aminocoumarin	341	155	186
Total Sewage	contig-75_11151_1	Aminocoumarin	341	155	186
Total Sewage	contig-75_1116_1	Streptogramin	21	88	42
Total Sewage	contig-75_1116_1	Streptogramin	21	88	42
Total Sewage	contig-75_1116_1	Streptogramin	21	88	42
Total Sewage	contig-75_1116_4	Beta Lactams	75	415	208
Total Sewage	contig-75_1116_4	Beta Lactams	75	415	208
Total Sewage	contig-75_1116_4	Beta Lactams	75	415	208
Total Sewage	contig-75_1116_4	Fluoroquinolones	75	415	208
Total Sewage	contig-75_1116_4	Fluoroquinolones	75	415	208
Total Sewage	contig-75_1116_4	Fluoroquinolones	75	415	208
Total Sewage	contig-75_1116_4	Macrolide	75	415	208
Total Sewage	contig-75_1116_4	Macrolide	75	415	208
Total Sewage	contig-75_1116_4	Macrolide	75	415	208
Total Sewage	contig-75_1116_4	Tetracycline	75	415	208
Total Sewage	contig-75_1116_4	Tetracycline	75	415	208
Total Sewage	contig-75_1116_4	Tetracycline	75	415	208
Total Sewage	contig-75_11213_2	Aminocoumarin	138	64	64
Total Sewage	contig-75_11213_2	Aminocoumarin	138	64	64
Total Sewage	contig-75_11213_2	Aminocoumarin	138	64	64
Total Sewage	contig-75_1122_1	Penicillin	101	93	106
Total Sewage	contig-75_1122_1	Penicillin	101	93	106
Total Sewage	contig-75_1122_1	Penicillin	101	93	106
Total Sewage	contig-75_11223_1	Polymyxin	188	201	233
Total Sewage	contig-75_11223_1	Polymyxin	188	201	233
Total Sewage	contig-75_11223_1	Polymyxin	188	201	233
Total Sewage	contig-75_11244_1	Macrolide	0	0	0
Total Sewage	contig-75_11244_1	Macrolide	0	0	0
Total Sewage	contig-75_11244_1	Macrolide	0	0	0
Total Sewage	contig-75_11273_2	Macrolide	56	104	174
Total Sewage	contig-75_11273_2	Macrolide	56	104	174
Total Sewage	contig-75_11273_2	Macrolide	56	104	174
Total Sewage	contig-75_11283_2	Lincosamide	156	61	116
Total Sewage	contig-75_11283_2	Lincosamide	156	61	116
Total Sewage	contig-75_11283_2	Lincosamide	156	61	116
Total Sewage	contig-75_11306_1	Fosmidomycin	53	45	55
Total Sewage	contig-75_11306_1	Fosmidomycin	53	45	55
Total Sewage	contig-75_11306_1	Fosmidomycin	53	45	55
Total Sewage	contig-75_1131_5	Ciprofloxacin	10	0	12
Total Sewage	contig-75_1131_5	Ciprofloxacin	10	0	12
Total Sewage	contig-75_1131_5	Ciprofloxacin	10	0	12
Total Sewage	contig-75_1131_5	Fluoroquinolones	10	0	12
Total Sewage	contig-75_1131_5	Fluoroquinolones	10	0	12
Total Sewage	contig-75_1131_5	Fluoroquinolones	10	0	12
Total Sewage	contig-75_11330_1	Beta Lactams	483	328	388
Total Sewage	contig-75_11330_1	Beta Lactams	483	328	388
Total Sewage	contig-75_11330_1	Beta Lactams	483	328	388
Total Sewage	contig-75_11336_2	Bacitracin	18	68	76
Total Sewage	contig-75_11336_2	Bacitracin	18	68	76
Total Sewage	contig-75_11336_2	Bacitracin	18	68	76
Total Sewage	contig-75_11339_1	Macrolide	155	1647	965
Total Sewage	contig-75_11339_1	Macrolide	155	1647	965
Total Sewage	contig-75_11339_1	Macrolide	155	1647	965
Total Sewage	contig-75_1135_1	Aminoglycosides	1028	961	1476
Total Sewage	contig-75_1135_1	Aminoglycosides	1028	961	1476
Total Sewage	contig-75_1135_1	Aminoglycosides	1028	961	1476
Total Sewage	contig-75_1135_1	Beta Lactams	1028	961	1476
Total Sewage	contig-75_1135_1	Beta Lactams	1028	961	1476
Total Sewage	contig-75_1135_1	Beta Lactams	1028	961	1476
Total Sewage	contig-75_1135_1	Fluoroquinolones	1028	961	1476
Total Sewage	contig-75_1135_1	Fluoroquinolones	1028	961	1476
Total Sewage	contig-75_1135_1	Fluoroquinolones	1028	961	1476
Total Sewage	contig-75_1135_1	Tetracycline	1028	961	1476
Total Sewage	contig-75_1135_1	Tetracycline	1028	961	1476
Total Sewage	contig-75_1135_1	Tetracycline	1028	961	1476
Total Sewage	contig-75_1135_1	Tigecycline	1028	961	1476
Total Sewage	contig-75_1135_1	Tigecycline	1028	961	1476
Total Sewage	contig-75_1135_1	Tigecycline	1028	961	1476
Total Sewage	contig-75_1135_2	Erythromycin	176	652	1692
Total Sewage	contig-75_1135_2	Erythromycin	176	652	1692
Total Sewage	contig-75_1135_2	Erythromycin	176	652	1692
Total Sewage	contig-75_1135_2	Tetracycline	176	652	1692
Total Sewage	contig-75_1135_2	Tetracycline	176	652	1692
Total Sewage	contig-75_1135_2	Tetracycline	176	652	1692
Total Sewage	contig-75_1135_2	Triclosan	176	652	1692
Total Sewage	contig-75_1135_2	Triclosan	176	652	1692
Total Sewage	contig-75_1135_2	Triclosan	176	652	1692
Total Sewage	contig-75_11356_1	Isoniazid	75	63	78
Total Sewage	contig-75_11356_1	Isoniazid	75	63	78
Total Sewage	contig-75_11356_1	Isoniazid	75	63	78
Total Sewage	contig-75_1138_2	Macrolide	75	57	85
Total Sewage	contig-75_1138_2	Macrolide	75	57	85
Total Sewage	contig-75_1138_2	Macrolide	75	57	85
Total Sewage	contig-75_11387_1	Aminoglycosides	0	0	14
Total Sewage	contig-75_11387_1	Aminoglycosides	0	0	14
Total Sewage	contig-75_11387_1	Aminoglycosides	0	0	14
Total Sewage	contig-75_11387_1	Beta Lactams	0	0	14
Total Sewage	contig-75_11387_1	Beta Lactams	0	0	14
Total Sewage	contig-75_11387_1	Beta Lactams	0	0	14
Total Sewage	contig-75_11387_1	Fluoroquinolones	0	0	14
Total Sewage	contig-75_11387_1	Fluoroquinolones	0	0	14
Total Sewage	contig-75_11387_1	Fluoroquinolones	0	0	14
Total Sewage	contig-75_11387_1	Tetracycline	0	0	14
Total Sewage	contig-75_11387_1	Tetracycline	0	0	14
Total Sewage	contig-75_11387_1	Tetracycline	0	0	14
Total Sewage	contig-75_11387_1	Tigecycline	0	0	14
Total Sewage	contig-75_11387_1	Tigecycline	0	0	14
Total Sewage	contig-75_11387_1	Tigecycline	0	0	14
Total Sewage	contig-75_11387_2	Beta Lactams	16	21	16
Total Sewage	contig-75_11387_2	Beta Lactams	16	21	16
Total Sewage	contig-75_11387_2	Beta Lactams	16	21	16
Total Sewage	contig-75_11387_2	Fluoroquinolones	16	21	16
Total Sewage	contig-75_11387_2	Fluoroquinolones	16	21	16
Total Sewage	contig-75_11387_2	Fluoroquinolones	16	21	16
Total Sewage	contig-75_11387_2	Macrolide	16	21	16
Total Sewage	contig-75_11387_2	Macrolide	16	21	16
Total Sewage	contig-75_11387_2	Macrolide	16	21	16
Total Sewage	contig-75_11388_1	Beta Lactams	23	57	53
Total Sewage	contig-75_11388_1	Beta Lactams	23	57	53
Total Sewage	contig-75_11388_1	Beta Lactams	23	57	53
Total Sewage	contig-75_11388_1	Fluoroquinolones	23	57	53
Total Sewage	contig-75_11388_1	Fluoroquinolones	23	57	53
Total Sewage	contig-75_11388_1	Fluoroquinolones	23	57	53
Total Sewage	contig-75_11388_1	Macrolide	23	57	53
Total Sewage	contig-75_11388_1	Macrolide	23	57	53
Total Sewage	contig-75_11388_1	Macrolide	23	57	53
Total Sewage	contig-75_11388_1	Tetracycline	23	57	53
Total Sewage	contig-75_11388_1	Tetracycline	23	57	53
Total Sewage	contig-75_11388_1	Tetracycline	23	57	53
Total Sewage	contig-75_11394_1	Tetracycline	185	887	556
Total Sewage	contig-75_11394_1	Tetracycline	185	887	556
Total Sewage	contig-75_11394_1	Tetracycline	185	887	556
Total Sewage	contig-75_11396_1	Aminocoumarin	2309	1902	1880
Total Sewage	contig-75_11396_1	Aminocoumarin	2309	1902	1880
Total Sewage	contig-75_11396_1	Aminocoumarin	2309	1902	1880
Total Sewage	contig-75_11399_1	Lincosamide	139	238	177
Total Sewage	contig-75_11399_1	Lincosamide	139	238	177
Total Sewage	contig-75_11399_1	Lincosamide	139	238	177
Total Sewage	contig-75_11399_1	Macrolide	139	238	177
Total Sewage	contig-75_11399_1	Macrolide	139	238	177
Total Sewage	contig-75_11399_1	Macrolide	139	238	177
Total Sewage	contig-75_11399_1	Streptogramin	139	238	177
Total Sewage	contig-75_11399_1	Streptogramin	139	238	177
Total Sewage	contig-75_11399_1	Streptogramin	139	238	177
Total Sewage	contig-75_114_1	Doxorubicin	54	72	72
Total Sewage	contig-75_114_1	Doxorubicin	54	72	72
Total Sewage	contig-75_114_1	Doxorubicin	54	72	72
Total Sewage	contig-75_114_1	Erythromycin	54	72	72
Total Sewage	contig-75_114_1	Erythromycin	54	72	72
Total Sewage	contig-75_114_1	Erythromycin	54	72	72
Total Sewage	contig-75_114_2	Fluoroquinolones	172	134	200
Total Sewage	contig-75_114_2	Fluoroquinolones	172	134	200
Total Sewage	contig-75_114_2	Fluoroquinolones	172	134	200
Total Sewage	contig-75_114_2	Tetracycline	172	134	200
Total Sewage	contig-75_114_2	Tetracycline	172	134	200
Total Sewage	contig-75_114_2	Tetracycline	172	134	200
Total Sewage	contig-75_114_3	Aminoglycosides	37	47	50
Total Sewage	contig-75_114_3	Aminoglycosides	37	47	50
Total Sewage	contig-75_114_3	Aminoglycosides	37	47	50
Total Sewage	contig-75_114_3	Beta Lactams	37	47	50
Total Sewage	contig-75_114_3	Beta Lactams	37	47	50
Total Sewage	contig-75_114_3	Beta Lactams	37	47	50
Total Sewage	contig-75_114_3	Fluoroquinolones	37	47	50
Total Sewage	contig-75_114_3	Fluoroquinolones	37	47	50
Total Sewage	contig-75_114_3	Fluoroquinolones	37	47	50
Total Sewage	contig-75_114_3	Tetracycline	37	47	50
Total Sewage	contig-75_114_3	Tetracycline	37	47	50
Total Sewage	contig-75_114_3	Tetracycline	37	47	50
Total Sewage	contig-75_114_3	Tigecycline	37	47	50
Total Sewage	contig-75_114_3	Tigecycline	37	47	50
Total Sewage	contig-75_114_3	Tigecycline	37	47	50
Total Sewage	contig-75_114_7	Chloramphenicol	0	12	14
Total Sewage	contig-75_114_7	Chloramphenicol	0	12	14
Total Sewage	contig-75_114_7	Chloramphenicol	0	12	14
Total Sewage	contig-75_114_7	Fluoroquinolones	0	12	14
Total Sewage	contig-75_114_7	Fluoroquinolones	0	12	14
Total Sewage	contig-75_114_7	Fluoroquinolones	0	12	14
Total Sewage	contig-75_114_7	Tetracycline	0	12	14
Total Sewage	contig-75_114_7	Tetracycline	0	12	14
Total Sewage	contig-75_114_7	Tetracycline	0	12	14
Total Sewage	contig-75_114_8	Aminocoumarin	42	26	42
Total Sewage	contig-75_114_8	Aminocoumarin	42	26	42
Total Sewage	contig-75_114_8	Aminocoumarin	42	26	42
Total Sewage	contig-75_1140_4	Aminocoumarin	1039	321	346
Total Sewage	contig-75_1140_4	Aminocoumarin	1039	321	346
Total Sewage	contig-75_1140_4	Aminocoumarin	1039	321	346
Total Sewage	contig-75_1140_5	Bicyclomycin	176	163	108
Total Sewage	contig-75_1140_5	Bicyclomycin	176	163	108
Total Sewage	contig-75_1140_5	Bicyclomycin	176	163	108
Total Sewage	contig-75_11413_1	Tetracycline	200	268	308
Total Sewage	contig-75_11413_1	Tetracycline	200	268	308
Total Sewage	contig-75_11413_1	Tetracycline	200	268	308
Total Sewage	contig-75_1143_3	Macrolide	33	28	20
Total Sewage	contig-75_1143_3	Macrolide	33	28	20
Total Sewage	contig-75_1143_3	Macrolide	33	28	20
Total Sewage	contig-75_1143_5	Aminocoumarin	89	82	49
Total Sewage	contig-75_1143_5	Aminocoumarin	89	82	49
Total Sewage	contig-75_1143_5	Aminocoumarin	89	82	49
Total Sewage	contig-75_11440_1	Aminocoumarin	125	203	196
Total Sewage	contig-75_11440_1	Aminocoumarin	125	203	196
Total Sewage	contig-75_11440_1	Aminocoumarin	125	203	196
Total Sewage	contig-75_11448_1	Aminocoumarin	22	90	71
Total Sewage	contig-75_11448_1	Aminocoumarin	22	90	71
Total Sewage	contig-75_11448_1	Aminocoumarin	22	90	71
Total Sewage	contig-75_11448_1	Aminoglycosides	22	90	71
Total Sewage	contig-75_11448_1	Aminoglycosides	22	90	71
Total Sewage	contig-75_11448_1	Aminoglycosides	22	90	71
Total Sewage	contig-75_11448_2	Vancomycin	53	151	130
Total Sewage	contig-75_11448_2	Vancomycin	53	151	130
Total Sewage	contig-75_11448_2	Vancomycin	53	151	130
Total Sewage	contig-75_11463_2	Macrolide	0	0	0
Total Sewage	contig-75_11463_2	Macrolide	0	0	0
Total Sewage	contig-75_11463_2	Macrolide	0	0	0
Total Sewage	contig-75_1147_1	Polymyxin	198	107	105
Total Sewage	contig-75_1147_1	Polymyxin	198	107	105
Total Sewage	contig-75_1147_1	Polymyxin	198	107	105
Total Sewage	contig-75_11480_1	Tetracycline	156	652	658
Total Sewage	contig-75_11480_1	Tetracycline	156	652	658
Total Sewage	contig-75_11480_1	Tetracycline	156	652	658
Total Sewage	contig-75_115_9	Thiostrepton	240	88	74
Total Sewage	contig-75_115_9	Thiostrepton	240	88	74
Total Sewage	contig-75_115_9	Thiostrepton	240	88	74
Total Sewage	contig-75_11545_2	Fluoroquinolones	0	0	0
Total Sewage	contig-75_11545_2	Fluoroquinolones	0	0	0
Total Sewage	contig-75_11545_2	Fluoroquinolones	0	0	0
Total Sewage	contig-75_11545_2	Tetracycline	0	0	0
Total Sewage	contig-75_11545_2	Tetracycline	0	0	0
Total Sewage	contig-75_11545_2	Tetracycline	0	0	0
Total Sewage	contig-75_1155_4	Lincosamide	72	51	34
Total Sewage	contig-75_1155_4	Lincosamide	72	51	34
Total Sewage	contig-75_1155_4	Lincosamide	72	51	34
Total Sewage	contig-75_1155_4	Streptogramin	72	51	34
Total Sewage	contig-75_1155_4	Streptogramin	72	51	34
Total Sewage	contig-75_1155_4	Streptogramin	72	51	34
Total Sewage	contig-75_1156_3	Aminocoumarin	17	0	0
Total Sewage	contig-75_1156_3	Aminocoumarin	17	0	0
Total Sewage	contig-75_1156_3	Aminocoumarin	17	0	0
Total Sewage	contig-75_11578_1	Bacitracin	0	0	0
Total Sewage	contig-75_11578_1	Bacitracin	0	0	0
Total Sewage	contig-75_11578_1	Bacitracin	0	0	0
Total Sewage	contig-75_1159_1	Vancomycin	42	33	27
Total Sewage	contig-75_1159_1	Vancomycin	42	33	27
Total Sewage	contig-75_1159_1	Vancomycin	42	33	27
Total Sewage	contig-75_1159_2	Aminoglycosides	422	114	135
Total Sewage	contig-75_1159_2	Aminoglycosides	422	114	135
Total Sewage	contig-75_1159_2	Aminoglycosides	422	114	135
Total Sewage	contig-75_1159_2	Beta Lactams	422	114	135
Total Sewage	contig-75_1159_2	Beta Lactams	422	114	135
Total Sewage	contig-75_1159_2	Beta Lactams	422	114	135
Total Sewage	contig-75_1159_2	Fluoroquinolones	422	114	135
Total Sewage	contig-75_1159_2	Fluoroquinolones	422	114	135
Total Sewage	contig-75_1159_2	Fluoroquinolones	422	114	135
Total Sewage	contig-75_11601_2	Tetracycline	106	318	191
Total Sewage	contig-75_11601_2	Tetracycline	106	318	191
Total Sewage	contig-75_11601_2	Tetracycline	106	318	191
Total Sewage	contig-75_11601_2	Tigecycline	106	318	191
Total Sewage	contig-75_11601_2	Tigecycline	106	318	191
Total Sewage	contig-75_11601_2	Tigecycline	106	318	191
Total Sewage	contig-75_11604_1	Aminocoumarin	77	139	127
Total Sewage	contig-75_11604_1	Aminocoumarin	77	139	127
Total Sewage	contig-75_11604_1	Aminocoumarin	77	139	127
Total Sewage	contig-75_11608_1	Elfamycin	0	26	20
Total Sewage	contig-75_11608_1	Elfamycin	0	26	20
Total Sewage	contig-75_11608_1	Elfamycin	0	26	20
Total Sewage	contig-75_1161_1	Aminocoumarin	143	141	141
Total Sewage	contig-75_1161_1	Aminocoumarin	143	141	141
Total Sewage	contig-75_1161_1	Aminocoumarin	143	141	141
Total Sewage	contig-75_1164_5	Sulfonamide	374	421	330
Total Sewage	contig-75_1164_5	Sulfonamide	374	421	330
Total Sewage	contig-75_1164_5	Sulfonamide	374	421	330
Total Sewage	contig-75_11660_1	Lincosamide	305	432	340
Total Sewage	contig-75_11660_1	Lincosamide	305	432	340
Total Sewage	contig-75_11660_1	Lincosamide	305	432	340
Total Sewage	contig-75_11660_1	Macrolide	305	432	340
Total Sewage	contig-75_11660_1	Macrolide	305	432	340
Total Sewage	contig-75_11660_1	Macrolide	305	432	340
Total Sewage	contig-75_11660_1	Streptogramin	305	432	340
Total Sewage	contig-75_11660_1	Streptogramin	305	432	340
Total Sewage	contig-75_11660_1	Streptogramin	305	432	340
Total Sewage	contig-75_11666_1	Macrolide	26	34	27
Total Sewage	contig-75_11666_1	Macrolide	26	34	27
Total Sewage	contig-75_11666_1	Macrolide	26	34	27
Total Sewage	contig-75_11669_1	Streptogramin	0	16	0
Total Sewage	contig-75_11669_1	Streptogramin	0	16	0
Total Sewage	contig-75_11669_1	Streptogramin	0	16	0
Total Sewage	contig-75_117_3	Beta Lactams	42	27	30
Total Sewage	contig-75_117_3	Beta Lactams	42	27	30
Total Sewage	contig-75_117_3	Beta Lactams	42	27	30
Total Sewage	contig-75_117_3	Fluoroquinolones	42	27	30
Total Sewage	contig-75_117_3	Fluoroquinolones	42	27	30
Total Sewage	contig-75_117_3	Fluoroquinolones	42	27	30
Total Sewage	contig-75_117_3	Macrolide	42	27	30
Total Sewage	contig-75_117_3	Macrolide	42	27	30
Total Sewage	contig-75_117_3	Macrolide	42	27	30
Total Sewage	contig-75_117_3	Tetracycline	42	27	30
Total Sewage	contig-75_117_3	Tetracycline	42	27	30
Total Sewage	contig-75_117_3	Tetracycline	42	27	30
Total Sewage	contig-75_1170_5	Lincosamide	81	220	142
Total Sewage	contig-75_1170_5	Lincosamide	81	220	142
Total Sewage	contig-75_1170_5	Lincosamide	81	220	142
Total Sewage	contig-75_1170_5	Macrolide	81	220	142
Total Sewage	contig-75_1170_5	Macrolide	81	220	142
Total Sewage	contig-75_1170_5	Macrolide	81	220	142
Total Sewage	contig-75_1170_5	Streptogramin	81	220	142
Total Sewage	contig-75_1170_5	Streptogramin	81	220	142
Total Sewage	contig-75_1170_5	Streptogramin	81	220	142
Total Sewage	contig-75_11708_2	Fluoroquinolones	810	926	668
Total Sewage	contig-75_11708_2	Fluoroquinolones	810	926	668
Total Sewage	contig-75_11708_2	Fluoroquinolones	810	926	668
Total Sewage	contig-75_11726_1	Polymyxin	70	383	344
Total Sewage	contig-75_11726_1	Polymyxin	70	383	344
Total Sewage	contig-75_11726_1	Polymyxin	70	383	344
Total Sewage	contig-75_11751_2	Aminocoumarin	1166	606	710
Total Sewage	contig-75_11751_2	Aminocoumarin	1166	606	710
Total Sewage	contig-75_11751_2	Aminocoumarin	1166	606	710
Total Sewage	contig-75_1177_4	Beta Lactams	41	30	21
Total Sewage	contig-75_1177_4	Beta Lactams	41	30	21
Total Sewage	contig-75_1177_4	Beta Lactams	41	30	21
Total Sewage	contig-75_1177_4	Fluoroquinolones	41	30	21
Total Sewage	contig-75_1177_4	Fluoroquinolones	41	30	21
Total Sewage	contig-75_1177_4	Fluoroquinolones	41	30	21
Total Sewage	contig-75_1177_4	Macrolide	41	30	21
Total Sewage	contig-75_1177_4	Macrolide	41	30	21
Total Sewage	contig-75_1177_4	Macrolide	41	30	21
Total Sewage	contig-75_1177_4	Tetracycline	41	30	21
Total Sewage	contig-75_1177_4	Tetracycline	41	30	21
Total Sewage	contig-75_1177_4	Tetracycline	41	30	21
Total Sewage	contig-75_11771_1	Vancomycin	0	0	0
Total Sewage	contig-75_11771_1	Vancomycin	0	0	0
Total Sewage	contig-75_11771_1	Vancomycin	0	0	0
Total Sewage	contig-75_1178_5	Bacitracin	108	160	105
Total Sewage	contig-75_1178_5	Bacitracin	108	160	105
Total Sewage	contig-75_1178_5	Bacitracin	108	160	105
Total Sewage	contig-75_11783_2	Teicoplanin	0	0	0
Total Sewage	contig-75_11783_2	Teicoplanin	0	0	0
Total Sewage	contig-75_11783_2	Teicoplanin	0	0	0
Total Sewage	contig-75_11783_2	Vancomycin	0	0	0
Total Sewage	contig-75_11783_2	Vancomycin	0	0	0
Total Sewage	contig-75_11783_2	Vancomycin	0	0	0
Total Sewage	contig-75_11804_1	Fluoroquinolones	0	22	27
Total Sewage	contig-75_11804_1	Fluoroquinolones	0	22	27
Total Sewage	contig-75_11804_1	Fluoroquinolones	0	22	27
Total Sewage	contig-75_11806_1	Beta Lactams	52	370	381
Total Sewage	contig-75_11806_1	Beta Lactams	52	370	381
Total Sewage	contig-75_11806_1	Beta Lactams	52	370	381
Total Sewage	contig-75_11806_1	Fluoroquinolones	52	370	381
Total Sewage	contig-75_11806_1	Fluoroquinolones	52	370	381
Total Sewage	contig-75_11806_1	Fluoroquinolones	52	370	381
Total Sewage	contig-75_11806_1	Macrolide	52	370	381
Total Sewage	contig-75_11806_1	Macrolide	52	370	381
Total Sewage	contig-75_11806_1	Macrolide	52	370	381
Total Sewage	contig-75_11806_1	Tetracycline	52	370	381
Total Sewage	contig-75_11806_1	Tetracycline	52	370	381
Total Sewage	contig-75_11806_1	Tetracycline	52	370	381
Total Sewage	contig-75_11810_2	Macrolide	12	11	10
Total Sewage	contig-75_11810_2	Macrolide	12	11	10
Total Sewage	contig-75_11810_2	Macrolide	12	11	10
Total Sewage	contig-75_1182_2	Chloramphenicol	89	107	121
Total Sewage	contig-75_1182_2	Chloramphenicol	89	107	121
Total Sewage	contig-75_1182_2	Chloramphenicol	89	107	121
Total Sewage	contig-75_1182_2	Fluoroquinolones	89	107	121
Total Sewage	contig-75_1182_2	Fluoroquinolones	89	107	121
Total Sewage	contig-75_1182_2	Fluoroquinolones	89	107	121
Total Sewage	contig-75_1182_2	Tetracycline	89	107	121
Total Sewage	contig-75_1182_2	Tetracycline	89	107	121
Total Sewage	contig-75_1182_2	Tetracycline	89	107	121
Total Sewage	contig-75_1182_3	Acriflavine	98	173	189
Total Sewage	contig-75_1182_3	Acriflavine	98	173	189
Total Sewage	contig-75_1182_3	Acriflavine	98	173	189
Total Sewage	contig-75_1182_3	Aminoglycosides	98	173	189
Total Sewage	contig-75_1182_3	Aminoglycosides	98	173	189
Total Sewage	contig-75_1182_3	Aminoglycosides	98	173	189
Total Sewage	contig-75_1182_3	Macrolide	98	173	189
Total Sewage	contig-75_1182_3	Macrolide	98	173	189
Total Sewage	contig-75_1182_3	Macrolide	98	173	189
Total Sewage	contig-75_1183_7	Rifampin	596	3605	3406
Total Sewage	contig-75_1183_7	Rifampin	596	3605	3406
Total Sewage	contig-75_1183_7	Rifampin	596	3605	3406
Total Sewage	contig-75_11832_2	Streptogramin	262	935	755
Total Sewage	contig-75_11832_2	Streptogramin	262	935	755
Total Sewage	contig-75_11832_2	Streptogramin	262	935	755
Total Sewage	contig-75_11858_1	Vancomycin	11	0	14
Total Sewage	contig-75_11858_1	Vancomycin	11	0	14
Total Sewage	contig-75_11858_1	Vancomycin	11	0	14
Total Sewage	contig-75_1188_3	Macrolide	51	55	100
Total Sewage	contig-75_1188_3	Macrolide	51	55	100
Total Sewage	contig-75_1188_3	Macrolide	51	55	100
Total Sewage	contig-75_11880_2	Mupirocin	38	30	23
Total Sewage	contig-75_11880_2	Mupirocin	38	30	23
Total Sewage	contig-75_11880_2	Mupirocin	38	30	23
Total Sewage	contig-75_11889_1	Aminocoumarin	0	0	0
Total Sewage	contig-75_11889_1	Aminocoumarin	0	0	0
Total Sewage	contig-75_11889_1	Aminocoumarin	0	0	0
Total Sewage	contig-75_11895_1	Aminocoumarin	60	119	124
Total Sewage	contig-75_11895_1	Aminocoumarin	60	119	124
Total Sewage	contig-75_11895_1	Aminocoumarin	60	119	124
Total Sewage	contig-75_11899_1	Tetracycline	464	1831	2116
Total Sewage	contig-75_11899_1	Tetracycline	464	1831	2116
Total Sewage	contig-75_11899_1	Tetracycline	464	1831	2116
Total Sewage	contig-75_119_22	Penicillin	0	0	0
Total Sewage	contig-75_119_22	Penicillin	0	0	0
Total Sewage	contig-75_119_22	Penicillin	0	0	0
Total Sewage	contig-75_1194_1	Macrolide	24	113	103
Total Sewage	contig-75_1194_1	Macrolide	24	113	103
Total Sewage	contig-75_1194_1	Macrolide	24	113	103
Total Sewage	contig-75_11940_1	Polymyxin	0	0	0
Total Sewage	contig-75_11940_1	Polymyxin	0	0	0
Total Sewage	contig-75_11940_1	Polymyxin	0	0	0
Total Sewage	contig-75_11966_3	Polymyxin	0	16	24
Total Sewage	contig-75_11966_3	Polymyxin	0	16	24
Total Sewage	contig-75_11966_3	Polymyxin	0	16	24
Total Sewage	contig-75_1197_4	Bacitracin	12	19	22
Total Sewage	contig-75_1197_4	Bacitracin	12	19	22
Total Sewage	contig-75_1197_4	Bacitracin	12	19	22
Total Sewage	contig-75_11970_2	Macrolide	47	72	63
Total Sewage	contig-75_11970_2	Macrolide	47	72	63
Total Sewage	contig-75_11970_2	Macrolide	47	72	63
Total Sewage	contig-75_12002_2	Lincosamide	20	67	68
Total Sewage	contig-75_12002_2	Lincosamide	20	67	68
Total Sewage	contig-75_12002_2	Lincosamide	20	67	68
Total Sewage	contig-75_12002_2	Macrolide	20	67	68
Total Sewage	contig-75_12002_2	Macrolide	20	67	68
Total Sewage	contig-75_12002_2	Macrolide	20	67	68
Total Sewage	contig-75_12002_2	Streptogramin	20	67	68
Total Sewage	contig-75_12002_2	Streptogramin	20	67	68
Total Sewage	contig-75_12002_2	Streptogramin	20	67	68
Total Sewage	contig-75_12006_1	Aminocoumarin	502	525	551
Total Sewage	contig-75_12006_1	Aminocoumarin	502	525	551
Total Sewage	contig-75_12006_1	Aminocoumarin	502	525	551
Total Sewage	contig-75_12006_1	Beta Lactams	502	525	551
Total Sewage	contig-75_12006_1	Beta Lactams	502	525	551
Total Sewage	contig-75_12006_1	Beta Lactams	502	525	551
Total Sewage	contig-75_12006_1	Chloramphenicol	502	525	551
Total Sewage	contig-75_12006_1	Chloramphenicol	502	525	551
Total Sewage	contig-75_12006_1	Chloramphenicol	502	525	551
Total Sewage	contig-75_12006_1	Fluoroquinolones	502	525	551
Total Sewage	contig-75_12006_1	Fluoroquinolones	502	525	551
Total Sewage	contig-75_12006_1	Fluoroquinolones	502	525	551
Total Sewage	contig-75_12006_1	Lincosamide	502	525	551
Total Sewage	contig-75_12006_1	Lincosamide	502	525	551
Total Sewage	contig-75_12006_1	Lincosamide	502	525	551
Total Sewage	contig-75_12006_1	Macrolide	502	525	551
Total Sewage	contig-75_12006_1	Macrolide	502	525	551
Total Sewage	contig-75_12006_1	Macrolide	502	525	551
Total Sewage	contig-75_12006_1	Tetracycline	502	525	551
Total Sewage	contig-75_12006_1	Tetracycline	502	525	551
Total Sewage	contig-75_12006_1	Tetracycline	502	525	551
Total Sewage	contig-75_12010_1	Isoniazid	240	1360	1095
Total Sewage	contig-75_12010_1	Isoniazid	240	1360	1095
Total Sewage	contig-75_12010_1	Isoniazid	240	1360	1095
Total Sewage	contig-75_12080_1	Macrolide	19	24	28
Total Sewage	contig-75_12080_1	Macrolide	19	24	28
Total Sewage	contig-75_12080_1	Macrolide	19	24	28
Total Sewage	contig-75_12087_2	Chloramphenicol	53	55	72
Total Sewage	contig-75_12087_2	Chloramphenicol	53	55	72
Total Sewage	contig-75_12087_2	Chloramphenicol	53	55	72
Total Sewage	contig-75_12087_2	Fluoroquinolones	53	55	72
Total Sewage	contig-75_12087_2	Fluoroquinolones	53	55	72
Total Sewage	contig-75_12087_2	Fluoroquinolones	53	55	72
Total Sewage	contig-75_121_6	Bacitracin	0	0	0
Total Sewage	contig-75_121_6	Bacitracin	0	0	0
Total Sewage	contig-75_121_6	Bacitracin	0	0	0
Total Sewage	contig-75_12148_1	Polymyxin	0	69	52
Total Sewage	contig-75_12148_1	Polymyxin	0	69	52
Total Sewage	contig-75_12148_1	Polymyxin	0	69	52
Total Sewage	contig-75_1216_1	Macrolide	10	0	14
Total Sewage	contig-75_1216_1	Macrolide	10	0	14
Total Sewage	contig-75_1216_1	Macrolide	10	0	14
Total Sewage	contig-75_1216_6	Macrolide	50	51	42
Total Sewage	contig-75_1216_6	Macrolide	50	51	42
Total Sewage	contig-75_1216_6	Macrolide	50	51	42
Total Sewage	contig-75_1216_6	Polymyxin	50	51	42
Total Sewage	contig-75_1216_6	Polymyxin	50	51	42
Total Sewage	contig-75_1216_6	Polymyxin	50	51	42
Total Sewage	contig-75_1217_2	Fosmidomycin	109	80	83
Total Sewage	contig-75_1217_2	Fosmidomycin	109	80	83
Total Sewage	contig-75_1217_2	Fosmidomycin	109	80	83
Total Sewage	contig-75_1219_5	Macrolide	32	26	28
Total Sewage	contig-75_1219_5	Macrolide	32	26	28
Total Sewage	contig-75_1219_5	Macrolide	32	26	28
Total Sewage	contig-75_1219_7	Erythromycin	108	78	68
Total Sewage	contig-75_1219_7	Erythromycin	108	78	68
Total Sewage	contig-75_1219_7	Erythromycin	108	78	68
Total Sewage	contig-75_1219_7	Tetracycline	108	78	68
Total Sewage	contig-75_1219_7	Tetracycline	108	78	68
Total Sewage	contig-75_1219_7	Tetracycline	108	78	68
Total Sewage	contig-75_1219_7	Triclosan	108	78	68
Total Sewage	contig-75_1219_7	Triclosan	108	78	68
Total Sewage	contig-75_1219_7	Triclosan	108	78	68
Total Sewage	contig-75_122_1	Tetracycline	0	0	0
Total Sewage	contig-75_122_1	Tetracycline	0	0	0
Total Sewage	contig-75_122_1	Tetracycline	0	0	0
Total Sewage	contig-75_122_1	Tigecycline	0	0	0
Total Sewage	contig-75_122_1	Tigecycline	0	0	0
Total Sewage	contig-75_122_1	Tigecycline	0	0	0
Total Sewage	contig-75_122_4	Vancomycin	19	0	0
Total Sewage	contig-75_122_4	Vancomycin	19	0	0
Total Sewage	contig-75_122_4	Vancomycin	19	0	0
Total Sewage	contig-75_1222_3	Tetracycline	271	255	256
Total Sewage	contig-75_1222_3	Tetracycline	271	255	256
Total Sewage	contig-75_1222_3	Tetracycline	271	255	256
Total Sewage	contig-75_12235_2	Teicoplanin	0	0	0
Total Sewage	contig-75_12235_2	Teicoplanin	0	0	0
Total Sewage	contig-75_12235_2	Teicoplanin	0	0	0
Total Sewage	contig-75_12235_2	Vancomycin	0	0	0
Total Sewage	contig-75_12235_2	Vancomycin	0	0	0
Total Sewage	contig-75_12235_2	Vancomycin	0	0	0
Total Sewage	contig-75_12245_2	Aminoglycosides	1120	1306	1492
Total Sewage	contig-75_12245_2	Aminoglycosides	1120	1306	1492
Total Sewage	contig-75_12245_2	Aminoglycosides	1120	1306	1492
Total Sewage	contig-75_12245_2	Beta Lactams	1120	1306	1492
Total Sewage	contig-75_12245_2	Beta Lactams	1120	1306	1492
Total Sewage	contig-75_12245_2	Beta Lactams	1120	1306	1492
Total Sewage	contig-75_12245_2	Fluoroquinolones	1120	1306	1492
Total Sewage	contig-75_12245_2	Fluoroquinolones	1120	1306	1492
Total Sewage	contig-75_12245_2	Fluoroquinolones	1120	1306	1492
Total Sewage	contig-75_12245_2	Tetracycline	1120	1306	1492
Total Sewage	contig-75_12245_2	Tetracycline	1120	1306	1492
Total Sewage	contig-75_12245_2	Tetracycline	1120	1306	1492
Total Sewage	contig-75_12245_2	Tigecycline	1120	1306	1492
Total Sewage	contig-75_12245_2	Tigecycline	1120	1306	1492
Total Sewage	contig-75_12245_2	Tigecycline	1120	1306	1492
Total Sewage	contig-75_1225_2	Elfamycin	703	8227	1275
Total Sewage	contig-75_1225_2	Elfamycin	703	8227	1275
Total Sewage	contig-75_1225_2	Elfamycin	703	8227	1275
Total Sewage	contig-75_1226_1	Polymyxin	31	32	19
Total Sewage	contig-75_1226_1	Polymyxin	31	32	19
Total Sewage	contig-75_1226_1	Polymyxin	31	32	19
Total Sewage	contig-75_1226_3	Vancomycin	13	28	19
Total Sewage	contig-75_1226_3	Vancomycin	13	28	19
Total Sewage	contig-75_1226_3	Vancomycin	13	28	19
Total Sewage	contig-75_1227_3	Macrolide	765	1229	1477
Total Sewage	contig-75_1227_3	Macrolide	765	1229	1477
Total Sewage	contig-75_1227_3	Macrolide	765	1229	1477
Total Sewage	contig-75_123_12	Beta Lactams	0	18	19
Total Sewage	contig-75_123_12	Beta Lactams	0	18	19
Total Sewage	contig-75_123_12	Beta Lactams	0	18	19
Total Sewage	contig-75_123_12	Fluoroquinolones	0	18	19
Total Sewage	contig-75_123_12	Fluoroquinolones	0	18	19
Total Sewage	contig-75_123_12	Fluoroquinolones	0	18	19
Total Sewage	contig-75_123_12	Macrolide	0	18	19
Total Sewage	contig-75_123_12	Macrolide	0	18	19
Total Sewage	contig-75_123_12	Macrolide	0	18	19
Total Sewage	contig-75_123_12	Tetracycline	0	18	19
Total Sewage	contig-75_123_12	Tetracycline	0	18	19
Total Sewage	contig-75_123_12	Tetracycline	0	18	19
Total Sewage	contig-75_123_13	Vancomycin	0	0	0
Total Sewage	contig-75_123_13	Vancomycin	0	0	0
Total Sewage	contig-75_123_13	Vancomycin	0	0	0
Total Sewage	contig-75_123_6	Macrolide	12	22	20
Total Sewage	contig-75_123_6	Macrolide	12	22	20
Total Sewage	contig-75_123_6	Macrolide	12	22	20
Total Sewage	contig-75_1233_3	Macrolide	34	186	197
Total Sewage	contig-75_1233_3	Macrolide	34	186	197
Total Sewage	contig-75_1233_3	Macrolide	34	186	197
Total Sewage	contig-75_12343_2	Macrolide	85	116	115
Total Sewage	contig-75_12343_2	Macrolide	85	116	115
Total Sewage	contig-75_12343_2	Macrolide	85	116	115
Total Sewage	contig-75_12357_2	Teicoplanin	106	31	22
Total Sewage	contig-75_12357_2	Teicoplanin	106	31	22
Total Sewage	contig-75_12357_2	Teicoplanin	106	31	22
Total Sewage	contig-75_12357_2	Vancomycin	106	31	22
Total Sewage	contig-75_12357_2	Vancomycin	106	31	22
Total Sewage	contig-75_12357_2	Vancomycin	106	31	22
Total Sewage	contig-75_1236_1	Fluoroquinolones	156	192	226
Total Sewage	contig-75_1236_1	Fluoroquinolones	156	192	226
Total Sewage	contig-75_1236_1	Fluoroquinolones	156	192	226
Total Sewage	contig-75_1238_5	Beta Lactams	40	63	51
Total Sewage	contig-75_1238_5	Beta Lactams	40	63	51
Total Sewage	contig-75_1238_5	Beta Lactams	40	63	51
Total Sewage	contig-75_1238_5	Chloramphenicol	40	63	51
Total Sewage	contig-75_1238_5	Chloramphenicol	40	63	51
Total Sewage	contig-75_1238_5	Chloramphenicol	40	63	51
Total Sewage	contig-75_12386_2	Lincosamide	0	0	0
Total Sewage	contig-75_12386_2	Lincosamide	0	0	0
Total Sewage	contig-75_12386_2	Lincosamide	0	0	0
Total Sewage	contig-75_12386_2	Macrolide	0	0	0
Total Sewage	contig-75_12386_2	Macrolide	0	0	0
Total Sewage	contig-75_12386_2	Macrolide	0	0	0
Total Sewage	contig-75_12386_2	Streptogramin	0	0	0
Total Sewage	contig-75_12386_2	Streptogramin	0	0	0
Total Sewage	contig-75_12386_2	Streptogramin	0	0	0
Total Sewage	contig-75_12396_1	Polymyxin	21	54	38
Total Sewage	contig-75_12396_1	Polymyxin	21	54	38
Total Sewage	contig-75_12396_1	Polymyxin	21	54	38
Total Sewage	contig-75_124_10	Bacitracin	0	0	0
Total Sewage	contig-75_124_10	Bacitracin	0	0	0
Total Sewage	contig-75_124_10	Bacitracin	0	0	0
Total Sewage	contig-75_12437_1	Macrolide	177	2197	1184
Total Sewage	contig-75_12437_1	Macrolide	177	2197	1184
Total Sewage	contig-75_12437_1	Macrolide	177	2197	1184
Total Sewage	contig-75_1244_2	Tetracycline	4608	2459	2743
Total Sewage	contig-75_1244_2	Tetracycline	4608	2459	2743
Total Sewage	contig-75_1244_2	Tetracycline	4608	2459	2743
Total Sewage	contig-75_12454_1	Tetracycline	21	14	25
Total Sewage	contig-75_12454_1	Tetracycline	21	14	25
Total Sewage	contig-75_12454_1	Tetracycline	21	14	25
Total Sewage	contig-75_12454_1	Tigecycline	21	14	25
Total Sewage	contig-75_12454_1	Tigecycline	21	14	25
Total Sewage	contig-75_12454_1	Tigecycline	21	14	25
Total Sewage	contig-75_1247_6	Tetracycline	24	0	0
Total Sewage	contig-75_1247_6	Tetracycline	24	0	0
Total Sewage	contig-75_1247_6	Tetracycline	24	0	0
Total Sewage	contig-75_12492_2	Macrolide	16	197	237
Total Sewage	contig-75_12492_2	Macrolide	16	197	237
Total Sewage	contig-75_12492_2	Macrolide	16	197	237
Total Sewage	contig-75_12514_1	Macrolide	0	11	0
Total Sewage	contig-75_12514_1	Macrolide	0	11	0
Total Sewage	contig-75_12514_1	Macrolide	0	11	0
Total Sewage	contig-75_12529_1	Lincosamide	16	24	30
Total Sewage	contig-75_12529_1	Lincosamide	16	24	30
Total Sewage	contig-75_12529_1	Lincosamide	16	24	30
Total Sewage	contig-75_12529_1	Macrolide	16	24	30
Total Sewage	contig-75_12529_1	Macrolide	16	24	30
Total Sewage	contig-75_12529_1	Macrolide	16	24	30
Total Sewage	contig-75_12529_1	Streptogramin	16	24	30
Total Sewage	contig-75_12529_1	Streptogramin	16	24	30
Total Sewage	contig-75_12529_1	Streptogramin	16	24	30
Total Sewage	contig-75_12529_2	Penicillin	21	17	16
Total Sewage	contig-75_12529_2	Penicillin	21	17	16
Total Sewage	contig-75_12529_2	Penicillin	21	17	16
Total Sewage	contig-75_1253_7	Macrolide	0	0	0
Total Sewage	contig-75_1253_7	Macrolide	0	0	0
Total Sewage	contig-75_1253_7	Macrolide	0	0	0
Total Sewage	contig-75_1256_3	Aminocoumarin	2450	11679	10265
Total Sewage	contig-75_1256_3	Aminocoumarin	2450	11679	10265
Total Sewage	contig-75_1256_3	Aminocoumarin	2450	11679	10265
Total Sewage	contig-75_12564_1	Ciprofloxacin	0	12	27
Total Sewage	contig-75_12564_1	Ciprofloxacin	0	12	27
Total Sewage	contig-75_12564_1	Ciprofloxacin	0	12	27
Total Sewage	contig-75_12564_1	Fluoroquinolones	0	12	27
Total Sewage	contig-75_12564_1	Fluoroquinolones	0	12	27
Total Sewage	contig-75_12564_1	Fluoroquinolones	0	12	27
Total Sewage	contig-75_12566_1	Macrolide	0	0	0
Total Sewage	contig-75_12566_1	Macrolide	0	0	0
Total Sewage	contig-75_12566_1	Macrolide	0	0	0
Total Sewage	contig-75_1257_1	Macrolide	0	0	0
Total Sewage	contig-75_1257_1	Macrolide	0	0	0
Total Sewage	contig-75_1257_1	Macrolide	0	0	0
Total Sewage	contig-75_12585_1	Bacitracin	0	22	13
Total Sewage	contig-75_12585_1	Bacitracin	0	22	13
Total Sewage	contig-75_12585_1	Bacitracin	0	22	13
Total Sewage	contig-75_126_12	Beta Lactams	33	32	45
Total Sewage	contig-75_126_12	Beta Lactams	33	32	45
Total Sewage	contig-75_126_12	Beta Lactams	33	32	45
Total Sewage	contig-75_126_12	Fluoroquinolones	33	32	45
Total Sewage	contig-75_126_12	Fluoroquinolones	33	32	45
Total Sewage	contig-75_126_12	Fluoroquinolones	33	32	45
Total Sewage	contig-75_126_12	Macrolide	33	32	45
Total Sewage	contig-75_126_12	Macrolide	33	32	45
Total Sewage	contig-75_126_12	Macrolide	33	32	45
Total Sewage	contig-75_126_12	Tetracycline	33	32	45
Total Sewage	contig-75_126_12	Tetracycline	33	32	45
Total Sewage	contig-75_126_12	Tetracycline	33	32	45
Total Sewage	contig-75_1260_2	Polymyxin	68	75	98
Total Sewage	contig-75_1260_2	Polymyxin	68	75	98
Total Sewage	contig-75_1260_2	Polymyxin	68	75	98
Total Sewage	contig-75_12600_2	Penicillin	0	0	0
Total Sewage	contig-75_12600_2	Penicillin	0	0	0
Total Sewage	contig-75_12600_2	Penicillin	0	0	0
Total Sewage	contig-75_12602_1	Bacitracin	113	81	65
Total Sewage	contig-75_12602_1	Bacitracin	113	81	65
Total Sewage	contig-75_12602_1	Bacitracin	113	81	65
Total Sewage	contig-75_1261_1	Aminocoumarin	112	184	140
Total Sewage	contig-75_1261_1	Aminocoumarin	112	184	140
Total Sewage	contig-75_1261_1	Aminocoumarin	112	184	140
Total Sewage	contig-75_1261_1	Beta Lactams	112	184	140
Total Sewage	contig-75_1261_1	Beta Lactams	112	184	140
Total Sewage	contig-75_1261_1	Beta Lactams	112	184	140
Total Sewage	contig-75_1261_1	Chloramphenicol	112	184	140
Total Sewage	contig-75_1261_1	Chloramphenicol	112	184	140
Total Sewage	contig-75_1261_1	Chloramphenicol	112	184	140
Total Sewage	contig-75_1261_1	Fluoroquinolones	112	184	140
Total Sewage	contig-75_1261_1	Fluoroquinolones	112	184	140
Total Sewage	contig-75_1261_1	Fluoroquinolones	112	184	140
Total Sewage	contig-75_1261_1	Lincosamide	112	184	140
Total Sewage	contig-75_1261_1	Lincosamide	112	184	140
Total Sewage	contig-75_1261_1	Lincosamide	112	184	140
Total Sewage	contig-75_1261_1	Macrolide	112	184	140
Total Sewage	contig-75_1261_1	Macrolide	112	184	140
Total Sewage	contig-75_1261_1	Macrolide	112	184	140
Total Sewage	contig-75_1261_1	Tetracycline	112	184	140
Total Sewage	contig-75_1261_1	Tetracycline	112	184	140
Total Sewage	contig-75_1261_1	Tetracycline	112	184	140
Total Sewage	contig-75_1261_2	Aminocoumarin	344	427	485
Total Sewage	contig-75_1261_2	Aminocoumarin	344	427	485
Total Sewage	contig-75_1261_2	Aminocoumarin	344	427	485
Total Sewage	contig-75_1261_2	Beta Lactams	344	427	485
Total Sewage	contig-75_1261_2	Beta Lactams	344	427	485
Total Sewage	contig-75_1261_2	Beta Lactams	344	427	485
Total Sewage	contig-75_1261_2	Chloramphenicol	344	427	485
Total Sewage	contig-75_1261_2	Chloramphenicol	344	427	485
Total Sewage	contig-75_1261_2	Chloramphenicol	344	427	485
Total Sewage	contig-75_1261_2	Fluoroquinolones	344	427	485
Total Sewage	contig-75_1261_2	Fluoroquinolones	344	427	485
Total Sewage	contig-75_1261_2	Fluoroquinolones	344	427	485
Total Sewage	contig-75_1261_2	Lincosamide	344	427	485
Total Sewage	contig-75_1261_2	Lincosamide	344	427	485
Total Sewage	contig-75_1261_2	Lincosamide	344	427	485
Total Sewage	contig-75_1261_2	Macrolide	344	427	485
Total Sewage	contig-75_1261_2	Macrolide	344	427	485
Total Sewage	contig-75_1261_2	Macrolide	344	427	485
Total Sewage	contig-75_1261_2	Tetracycline	344	427	485
Total Sewage	contig-75_1261_2	Tetracycline	344	427	485
Total Sewage	contig-75_1261_2	Tetracycline	344	427	485
Total Sewage	contig-75_1265_3	Macrolide	0	14	0
Total Sewage	contig-75_1265_3	Macrolide	0	14	0
Total Sewage	contig-75_1265_3	Macrolide	0	14	0
Total Sewage	contig-75_12661_2	Tetracycline	1269	5358	3793
Total Sewage	contig-75_12661_2	Tetracycline	1269	5358	3793
Total Sewage	contig-75_12661_2	Tetracycline	1269	5358	3793
Total Sewage	contig-75_12666_1	Macrolide	25	26	26
Total Sewage	contig-75_12666_1	Macrolide	25	26	26
Total Sewage	contig-75_12666_1	Macrolide	25	26	26
Total Sewage	contig-75_12668_1	Macrolide	98	81	89
Total Sewage	contig-75_12668_1	Macrolide	98	81	89
Total Sewage	contig-75_12668_1	Macrolide	98	81	89
Total Sewage	contig-75_12673_1	Vancomycin	0	0	0
Total Sewage	contig-75_12673_1	Vancomycin	0	0	0
Total Sewage	contig-75_12673_1	Vancomycin	0	0	0
Total Sewage	contig-75_1269_1	Tetracycline	13	17	19
Total Sewage	contig-75_1269_1	Tetracycline	13	17	19
Total Sewage	contig-75_1269_1	Tetracycline	13	17	19
Total Sewage	contig-75_1269_5	Trimethoprim	15	0	0
Total Sewage	contig-75_1269_5	Trimethoprim	15	0	0
Total Sewage	contig-75_1269_5	Trimethoprim	15	0	0
Total Sewage	contig-75_1269_6	Trimethoprim	20	0	0
Total Sewage	contig-75_1269_6	Trimethoprim	20	0	0
Total Sewage	contig-75_1269_6	Trimethoprim	20	0	0
Total Sewage	contig-75_12699_2	Polymyxin	0	0	0
Total Sewage	contig-75_12699_2	Polymyxin	0	0	0
Total Sewage	contig-75_12699_2	Polymyxin	0	0	0
Total Sewage	contig-75_1270_4	Aminocoumarin	401	1331	1188
Total Sewage	contig-75_1270_4	Aminocoumarin	401	1331	1188
Total Sewage	contig-75_1270_4	Aminocoumarin	401	1331	1188
Total Sewage	contig-75_12709_1	Tetracycline	436	1996	1510
Total Sewage	contig-75_12709_1	Tetracycline	436	1996	1510
Total Sewage	contig-75_12709_1	Tetracycline	436	1996	1510
Total Sewage	contig-75_1273_1	Teicoplanin	1264	714	794
Total Sewage	contig-75_1273_1	Teicoplanin	1264	714	794
Total Sewage	contig-75_1273_1	Teicoplanin	1264	714	794
Total Sewage	contig-75_1273_1	Vancomycin	1264	714	794
Total Sewage	contig-75_1273_1	Vancomycin	1264	714	794
Total Sewage	contig-75_1273_1	Vancomycin	1264	714	794
Total Sewage	contig-75_12735_1	Aminocoumarin	179	412	411
Total Sewage	contig-75_12735_1	Aminocoumarin	179	412	411
Total Sewage	contig-75_12735_1	Aminocoumarin	179	412	411
Total Sewage	contig-75_12735_1	Beta Lactams	179	412	411
Total Sewage	contig-75_12735_1	Beta Lactams	179	412	411
Total Sewage	contig-75_12735_1	Beta Lactams	179	412	411
Total Sewage	contig-75_12735_1	Chloramphenicol	179	412	411
Total Sewage	contig-75_12735_1	Chloramphenicol	179	412	411
Total Sewage	contig-75_12735_1	Chloramphenicol	179	412	411
Total Sewage	contig-75_12735_1	Fluoroquinolones	179	412	411
Total Sewage	contig-75_12735_1	Fluoroquinolones	179	412	411
Total Sewage	contig-75_12735_1	Fluoroquinolones	179	412	411
Total Sewage	contig-75_12735_1	Lincosamide	179	412	411
Total Sewage	contig-75_12735_1	Lincosamide	179	412	411
Total Sewage	contig-75_12735_1	Lincosamide	179	412	411
Total Sewage	contig-75_12735_1	Macrolide	179	412	411
Total Sewage	contig-75_12735_1	Macrolide	179	412	411
Total Sewage	contig-75_12735_1	Macrolide	179	412	411
Total Sewage	contig-75_12735_1	Tetracycline	179	412	411
Total Sewage	contig-75_12735_1	Tetracycline	179	412	411
Total Sewage	contig-75_12735_1	Tetracycline	179	412	411
Total Sewage	contig-75_12764_3	Lincosamide	79	18	48
Total Sewage	contig-75_12764_3	Lincosamide	79	18	48
Total Sewage	contig-75_12764_3	Lincosamide	79	18	48
Total Sewage	contig-75_12764_3	Macrolide	79	18	48
Total Sewage	contig-75_12764_3	Macrolide	79	18	48
Total Sewage	contig-75_12764_3	Macrolide	79	18	48
Total Sewage	contig-75_12764_3	Streptogramin	79	18	48
Total Sewage	contig-75_12764_3	Streptogramin	79	18	48
Total Sewage	contig-75_12764_3	Streptogramin	79	18	48
Total Sewage	contig-75_1277_2	Lincosamide	45	10	15
Total Sewage	contig-75_1277_2	Lincosamide	45	10	15
Total Sewage	contig-75_1277_2	Lincosamide	45	10	15
Total Sewage	contig-75_12776_2	Fluoroquinolones	166	763	606
Total Sewage	contig-75_12776_2	Fluoroquinolones	166	763	606
Total Sewage	contig-75_12776_2	Fluoroquinolones	166	763	606
Total Sewage	contig-75_1278_7	Macrolide	0	0	0
Total Sewage	contig-75_1278_7	Macrolide	0	0	0
Total Sewage	contig-75_1278_7	Macrolide	0	0	0
Total Sewage	contig-75_128_1	Streptogramin	457	229	217
Total Sewage	contig-75_128_1	Streptogramin	457	229	217
Total Sewage	contig-75_128_1	Streptogramin	457	229	217
Total Sewage	contig-75_1280_3	Beta Lactams	28	63	56
Total Sewage	contig-75_1280_3	Beta Lactams	28	63	56
Total Sewage	contig-75_1280_3	Beta Lactams	28	63	56
Total Sewage	contig-75_1280_3	Fluoroquinolones	28	63	56
Total Sewage	contig-75_1280_3	Fluoroquinolones	28	63	56
Total Sewage	contig-75_1280_3	Fluoroquinolones	28	63	56
Total Sewage	contig-75_1280_3	Macrolide	28	63	56
Total Sewage	contig-75_1280_3	Macrolide	28	63	56
Total Sewage	contig-75_1280_3	Macrolide	28	63	56
Total Sewage	contig-75_12818_1	Ciprofloxacin	0	0	0
Total Sewage	contig-75_12818_1	Ciprofloxacin	0	0	0
Total Sewage	contig-75_12818_1	Ciprofloxacin	0	0	0
Total Sewage	contig-75_12818_1	Fluoroquinolones	0	0	0
Total Sewage	contig-75_12818_1	Fluoroquinolones	0	0	0
Total Sewage	contig-75_12818_1	Fluoroquinolones	0	0	0
Total Sewage	contig-75_12857_2	Macrolide	0	31	16
Total Sewage	contig-75_12857_2	Macrolide	0	31	16
Total Sewage	contig-75_12857_2	Macrolide	0	31	16
Total Sewage	contig-75_12862_1	Acriflavine	36	71	75
Total Sewage	contig-75_12862_1	Acriflavine	36	71	75
Total Sewage	contig-75_12862_1	Acriflavine	36	71	75
Total Sewage	contig-75_12862_1	Aminoglycosides	36	71	75
Total Sewage	contig-75_12862_1	Aminoglycosides	36	71	75
Total Sewage	contig-75_12862_1	Aminoglycosides	36	71	75
Total Sewage	contig-75_12862_1	Beta Lactams	36	71	75
Total Sewage	contig-75_12862_1	Beta Lactams	36	71	75
Total Sewage	contig-75_12862_1	Beta Lactams	36	71	75
Total Sewage	contig-75_12862_1	Glycylcycline	36	71	75
Total Sewage	contig-75_12862_1	Glycylcycline	36	71	75
Total Sewage	contig-75_12862_1	Glycylcycline	36	71	75
Total Sewage	contig-75_12862_1	Macrolide	36	71	75
Total Sewage	contig-75_12862_1	Macrolide	36	71	75
Total Sewage	contig-75_12862_1	Macrolide	36	71	75
Total Sewage	contig-75_12863_1	Rifampin	410	505	276
Total Sewage	contig-75_12863_1	Rifampin	410	505	276
Total Sewage	contig-75_12863_1	Rifampin	410	505	276
Total Sewage	contig-75_1290_8	Elfamycin	1012	1121	1195
Total Sewage	contig-75_1290_8	Elfamycin	1012	1121	1195
Total Sewage	contig-75_1290_8	Elfamycin	1012	1121	1195
Total Sewage	contig-75_12903_1	Macrolide	42	28	54
Total Sewage	contig-75_12903_1	Macrolide	42	28	54
Total Sewage	contig-75_12903_1	Macrolide	42	28	54
Total Sewage	contig-75_12964_1	Tetracycline	174	935	806
Total Sewage	contig-75_12964_1	Tetracycline	174	935	806
Total Sewage	contig-75_12964_1	Tetracycline	174	935	806
Total Sewage	contig-75_12967_2	Aminocoumarin	35	116	149
Total Sewage	contig-75_12967_2	Aminocoumarin	35	116	149
Total Sewage	contig-75_12967_2	Aminocoumarin	35	116	149
Total Sewage	contig-75_12999_1	Teicoplanin	55	56	37
Total Sewage	contig-75_12999_1	Teicoplanin	55	56	37
Total Sewage	contig-75_12999_1	Teicoplanin	55	56	37
Total Sewage	contig-75_12999_1	Vancomycin	55	56	37
Total Sewage	contig-75_12999_1	Vancomycin	55	56	37
Total Sewage	contig-75_12999_1	Vancomycin	55	56	37
Total Sewage	contig-75_13_21	Elfamycin	351	387	391
Total Sewage	contig-75_13_21	Elfamycin	351	387	391
Total Sewage	contig-75_13_21	Elfamycin	351	387	391
Total Sewage	contig-75_13_25	Chloramphenicol	27	74	92
Total Sewage	contig-75_13_25	Chloramphenicol	27	74	92
Total Sewage	contig-75_13_25	Chloramphenicol	27	74	92
Total Sewage	contig-75_13011_2	Macrolide	17	48	53
Total Sewage	contig-75_13011_2	Macrolide	17	48	53
Total Sewage	contig-75_13011_2	Macrolide	17	48	53
Total Sewage	contig-75_13016_1	Polymyxin	15	63	55
Total Sewage	contig-75_13016_1	Polymyxin	15	63	55
Total Sewage	contig-75_13016_1	Polymyxin	15	63	55
Total Sewage	contig-75_1303_4	Bacitracin	19	142	122
Total Sewage	contig-75_1303_4	Bacitracin	19	142	122
Total Sewage	contig-75_1303_4	Bacitracin	19	142	122
Total Sewage	contig-75_1309_6	Vancomycin	49	193	109
Total Sewage	contig-75_1309_6	Vancomycin	49	193	109
Total Sewage	contig-75_1309_6	Vancomycin	49	193	109
Total Sewage	contig-75_13093_2	Aminoglycosides	0	0	0
Total Sewage	contig-75_13093_2	Aminoglycosides	0	0	0
Total Sewage	contig-75_13093_2	Aminoglycosides	0	0	0
Total Sewage	contig-75_13094_1	Fluoroquinolones	0	0	0
Total Sewage	contig-75_13094_1	Fluoroquinolones	0	0	0
Total Sewage	contig-75_13094_1	Fluoroquinolones	0	0	0
Total Sewage	contig-75_13094_1	Tetracycline	0	0	0
Total Sewage	contig-75_13094_1	Tetracycline	0	0	0
Total Sewage	contig-75_13094_1	Tetracycline	0	0	0
Total Sewage	contig-75_13094_2	Chloramphenicol	0	0	0
Total Sewage	contig-75_13094_2	Chloramphenicol	0	0	0
Total Sewage	contig-75_13094_2	Chloramphenicol	0	0	0
Total Sewage	contig-75_13097_2	Ciprofloxacin	0	0	0
Total Sewage	contig-75_13097_2	Ciprofloxacin	0	0	0
Total Sewage	contig-75_13097_2	Ciprofloxacin	0	0	0
Total Sewage	contig-75_13097_2	Fluoroquinolones	0	0	0
Total Sewage	contig-75_13097_2	Fluoroquinolones	0	0	0
Total Sewage	contig-75_13097_2	Fluoroquinolones	0	0	0
Total Sewage	contig-75_131_8	Polymyxin	14	45	35
Total Sewage	contig-75_131_8	Polymyxin	14	45	35
Total Sewage	contig-75_131_8	Polymyxin	14	45	35
Total Sewage	contig-75_1310_2	Aminoglycosides	0	0	0
Total Sewage	contig-75_1310_2	Aminoglycosides	0	0	0
Total Sewage	contig-75_1310_2	Aminoglycosides	0	0	0
Total Sewage	contig-75_1310_2	Fluoramphenicol	0	0	0
Total Sewage	contig-75_1310_2	Fluoramphenicol	0	0	0
Total Sewage	contig-75_1310_2	Fluoramphenicol	0	0	0
Total Sewage	contig-75_1310_3	Macrolide	0	0	0
Total Sewage	contig-75_1310_3	Macrolide	0	0	0
Total Sewage	contig-75_1310_3	Macrolide	0	0	0
Total Sewage	contig-75_1310_4	Macrolide	0	0	0
Total Sewage	contig-75_1310_4	Macrolide	0	0	0
Total Sewage	contig-75_1310_4	Macrolide	0	0	0
Total Sewage	contig-75_13123_2	Aminocoumarin	15	61	87
Total Sewage	contig-75_13123_2	Aminocoumarin	15	61	87
Total Sewage	contig-75_13123_2	Aminocoumarin	15	61	87
Total Sewage	contig-75_13123_2	Aminoglycosides	15	61	87
Total Sewage	contig-75_13123_2	Aminoglycosides	15	61	87
Total Sewage	contig-75_13123_2	Aminoglycosides	15	61	87
Total Sewage	contig-75_13137_2	Beta Lactams	32	14	17
Total Sewage	contig-75_13137_2	Beta Lactams	32	14	17
Total Sewage	contig-75_13137_2	Beta Lactams	32	14	17
Total Sewage	contig-75_13137_2	Fluoroquinolones	32	14	17
Total Sewage	contig-75_13137_2	Fluoroquinolones	32	14	17
Total Sewage	contig-75_13137_2	Fluoroquinolones	32	14	17
Total Sewage	contig-75_13137_2	Macrolide	32	14	17
Total Sewage	contig-75_13137_2	Macrolide	32	14	17
Total Sewage	contig-75_13137_2	Macrolide	32	14	17
Total Sewage	contig-75_13137_2	Tetracycline	32	14	17
Total Sewage	contig-75_13137_2	Tetracycline	32	14	17
Total Sewage	contig-75_13137_2	Tetracycline	32	14	17
Total Sewage	contig-75_13174_1	Aminocoumarin	167	111	114
Total Sewage	contig-75_13174_1	Aminocoumarin	167	111	114
Total Sewage	contig-75_13174_1	Aminocoumarin	167	111	114
Total Sewage	contig-75_13190_3	Ciprofloxacin	0	0	0
Total Sewage	contig-75_13190_3	Ciprofloxacin	0	0	0
Total Sewage	contig-75_13190_3	Ciprofloxacin	0	0	0
Total Sewage	contig-75_13190_3	Fluoroquinolones	0	0	0
Total Sewage	contig-75_13190_3	Fluoroquinolones	0	0	0
Total Sewage	contig-75_13190_3	Fluoroquinolones	0	0	0
Total Sewage	contig-75_1320_2	Rifampin	1490	10059	5864
Total Sewage	contig-75_1320_2	Rifampin	1490	10059	5864
Total Sewage	contig-75_1320_2	Rifampin	1490	10059	5864
Total Sewage	contig-75_1321_4	Aminocoumarin	28	21	29
Total Sewage	contig-75_1321_4	Aminocoumarin	28	21	29
Total Sewage	contig-75_1321_4	Aminocoumarin	28	21	29
Total Sewage	contig-75_13243_2	Beta Lactams	113	102	103
Total Sewage	contig-75_13243_2	Beta Lactams	113	102	103
Total Sewage	contig-75_13243_2	Beta Lactams	113	102	103
Total Sewage	contig-75_13257_1	Bacitracin	173	376	183
Total Sewage	contig-75_13257_1	Bacitracin	173	376	183
Total Sewage	contig-75_13257_1	Bacitracin	173	376	183
Total Sewage	contig-75_13258_2	Streptogramin	0	0	0
Total Sewage	contig-75_13258_2	Streptogramin	0	0	0
Total Sewage	contig-75_13258_2	Streptogramin	0	0	0
Total Sewage	contig-75_13262_2	Bacitracin	0	0	0
Total Sewage	contig-75_13262_2	Bacitracin	0	0	0
Total Sewage	contig-75_13262_2	Bacitracin	0	0	0
Total Sewage	contig-75_13297_1	Polymyxin	132	33	39
Total Sewage	contig-75_13297_1	Polymyxin	132	33	39
Total Sewage	contig-75_13297_1	Polymyxin	132	33	39
Total Sewage	contig-75_1330_2	Vancomycin	0	0	0
Total Sewage	contig-75_1330_2	Vancomycin	0	0	0
Total Sewage	contig-75_1330_2	Vancomycin	0	0	0
Total Sewage	contig-75_1330_6	Macrolide	0	0	0
Total Sewage	contig-75_1330_6	Macrolide	0	0	0
Total Sewage	contig-75_1330_6	Macrolide	0	0	0
Total Sewage	contig-75_13311_1	Triclosan	44	159	127
Total Sewage	contig-75_13311_1	Triclosan	44	159	127
Total Sewage	contig-75_13311_1	Triclosan	44	159	127
Total Sewage	contig-75_13347_2	Vancomycin	0	0	0
Total Sewage	contig-75_13347_2	Vancomycin	0	0	0
Total Sewage	contig-75_13347_2	Vancomycin	0	0	0
Total Sewage	contig-75_13372_1	Beta Lactams	50	436	292
Total Sewage	contig-75_13372_1	Beta Lactams	50	436	292
Total Sewage	contig-75_13372_1	Beta Lactams	50	436	292
Total Sewage	contig-75_134_2	Fluoroquinolones	78	25	51
Total Sewage	contig-75_134_2	Fluoroquinolones	78	25	51
Total Sewage	contig-75_134_2	Fluoroquinolones	78	25	51
Total Sewage	contig-75_134_3	Aminocoumarin	75	18	14
Total Sewage	contig-75_134_3	Aminocoumarin	75	18	14
Total Sewage	contig-75_134_3	Aminocoumarin	75	18	14
Total Sewage	contig-75_13427_1	Macrolide	0	0	0
Total Sewage	contig-75_13427_1	Macrolide	0	0	0
Total Sewage	contig-75_13427_1	Macrolide	0	0	0
Total Sewage	contig-75_13440_1	Aminoglycosides	0	0	0
Total Sewage	contig-75_13440_1	Aminoglycosides	0	0	0
Total Sewage	contig-75_13440_1	Aminoglycosides	0	0	0
Total Sewage	contig-75_13440_1	Beta Lactams	0	0	0
Total Sewage	contig-75_13440_1	Beta Lactams	0	0	0
Total Sewage	contig-75_13440_1	Beta Lactams	0	0	0
Total Sewage	contig-75_13440_1	Fluoroquinolones	0	0	0
Total Sewage	contig-75_13440_1	Fluoroquinolones	0	0	0
Total Sewage	contig-75_13440_1	Fluoroquinolones	0	0	0
Total Sewage	contig-75_1348_2	Chloramphenicol	0	0	0
Total Sewage	contig-75_1348_2	Chloramphenicol	0	0	0
Total Sewage	contig-75_1348_2	Chloramphenicol	0	0	0
Total Sewage	contig-75_1349_4	Thiostrepton	134	110	82
Total Sewage	contig-75_1349_4	Thiostrepton	134	110	82
Total Sewage	contig-75_1349_4	Thiostrepton	134	110	82
Total Sewage	contig-75_1350_5	Penicillin	63	47	63
Total Sewage	contig-75_1350_5	Penicillin	63	47	63
Total Sewage	contig-75_1350_5	Penicillin	63	47	63
Total Sewage	contig-75_1351_5	Lincosamide	44	59	79
Total Sewage	contig-75_1351_5	Lincosamide	44	59	79
Total Sewage	contig-75_1351_5	Lincosamide	44	59	79
Total Sewage	contig-75_1351_5	Macrolide	44	59	79
Total Sewage	contig-75_1351_5	Macrolide	44	59	79
Total Sewage	contig-75_1351_5	Macrolide	44	59	79
Total Sewage	contig-75_1351_5	Streptogramin	44	59	79
Total Sewage	contig-75_1351_5	Streptogramin	44	59	79
Total Sewage	contig-75_1351_5	Streptogramin	44	59	79
Total Sewage	contig-75_13547_1	Erythromycin	94	54	67
Total Sewage	contig-75_13547_1	Erythromycin	94	54	67
Total Sewage	contig-75_13547_1	Erythromycin	94	54	67
Total Sewage	contig-75_13547_1	Tetracycline	94	54	67
Total Sewage	contig-75_13547_1	Tetracycline	94	54	67
Total Sewage	contig-75_13547_1	Tetracycline	94	54	67
Total Sewage	contig-75_13547_1	Triclosan	94	54	67
Total Sewage	contig-75_13547_1	Triclosan	94	54	67
Total Sewage	contig-75_13547_1	Triclosan	94	54	67
Total Sewage	contig-75_1355_2	Lincosamide	17	11	15
Total Sewage	contig-75_1355_2	Lincosamide	17	11	15
Total Sewage	contig-75_1355_2	Lincosamide	17	11	15
Total Sewage	contig-75_1355_2	Streptogramin	17	11	15
Total Sewage	contig-75_1355_2	Streptogramin	17	11	15
Total Sewage	contig-75_1355_2	Streptogramin	17	11	15
Total Sewage	contig-75_13554_1	Beta Lactams	0	0	0
Total Sewage	contig-75_13554_1	Beta Lactams	0	0	0
Total Sewage	contig-75_13554_1	Beta Lactams	0	0	0
Total Sewage	contig-75_13554_1	Fluoroquinolones	0	0	0
Total Sewage	contig-75_13554_1	Fluoroquinolones	0	0	0
Total Sewage	contig-75_13554_1	Fluoroquinolones	0	0	0
Total Sewage	contig-75_13554_1	Macrolide	0	0	0
Total Sewage	contig-75_13554_1	Macrolide	0	0	0
Total Sewage	contig-75_13554_1	Macrolide	0	0	0
Total Sewage	contig-75_13554_1	Tetracycline	0	0	0
Total Sewage	contig-75_13554_1	Tetracycline	0	0	0
Total Sewage	contig-75_13554_1	Tetracycline	0	0	0
Total Sewage	contig-75_1356_2	Isoniazid	333	1046	1126
Total Sewage	contig-75_1356_2	Isoniazid	333	1046	1126
Total Sewage	contig-75_1356_2	Isoniazid	333	1046	1126
Total Sewage	contig-75_13570_1	Macrolide	116	319	215
Total Sewage	contig-75_13570_1	Macrolide	116	319	215
Total Sewage	contig-75_13570_1	Macrolide	116	319	215
Total Sewage	contig-75_136_9	Lincosamide	48	32	37
Total Sewage	contig-75_136_9	Lincosamide	48	32	37
Total Sewage	contig-75_136_9	Lincosamide	48	32	37
Total Sewage	contig-75_136_9	Macrolide	48	32	37
Total Sewage	contig-75_136_9	Macrolide	48	32	37
Total Sewage	contig-75_136_9	Macrolide	48	32	37
Total Sewage	contig-75_136_9	Streptomycin	48	32	37
Total Sewage	contig-75_136_9	Streptomycin	48	32	37
Total Sewage	contig-75_136_9	Streptomycin	48	32	37
Total Sewage	contig-75_13663_1	Erythromycin	71	21	12
Total Sewage	contig-75_13663_1	Erythromycin	71	21	12
Total Sewage	contig-75_13663_1	Erythromycin	71	21	12
Total Sewage	contig-75_13663_1	Tetracycline	71	21	12
Total Sewage	contig-75_13663_1	Tetracycline	71	21	12
Total Sewage	contig-75_13663_1	Tetracycline	71	21	12
Total Sewage	contig-75_13663_1	Triclosan	71	21	12
Total Sewage	contig-75_13663_1	Triclosan	71	21	12
Total Sewage	contig-75_13663_1	Triclosan	71	21	12
Total Sewage	contig-75_13673_1	Fluoroquinolones	17	21	15
Total Sewage	contig-75_13673_1	Fluoroquinolones	17	21	15
Total Sewage	contig-75_13673_1	Fluoroquinolones	17	21	15
Total Sewage	contig-75_137_10	Fosmidomycin	24	24	34
Total Sewage	contig-75_137_10	Fosmidomycin	24	24	34
Total Sewage	contig-75_137_10	Fosmidomycin	24	24	34
Total Sewage	contig-75_137_17	Beta Lactams	16	77	109
Total Sewage	contig-75_137_17	Beta Lactams	16	77	109
Total Sewage	contig-75_137_17	Beta Lactams	16	77	109
Total Sewage	contig-75_137_17	Fluoroquinolones	16	77	109
Total Sewage	contig-75_137_17	Fluoroquinolones	16	77	109
Total Sewage	contig-75_137_17	Fluoroquinolones	16	77	109
Total Sewage	contig-75_137_17	Macrolide	16	77	109
Total Sewage	contig-75_137_17	Macrolide	16	77	109
Total Sewage	contig-75_137_17	Macrolide	16	77	109
Total Sewage	contig-75_137_17	Tetracycline	16	77	109
Total Sewage	contig-75_137_17	Tetracycline	16	77	109
Total Sewage	contig-75_137_17	Tetracycline	16	77	109
Total Sewage	contig-75_1371_1	Aminocoumarin	171	94	59
Total Sewage	contig-75_1371_1	Aminocoumarin	171	94	59
Total Sewage	contig-75_1371_1	Aminocoumarin	171	94	59
Total Sewage	contig-75_1371_1	Aminoglycosides	171	94	59
Total Sewage	contig-75_1371_1	Aminoglycosides	171	94	59
Total Sewage	contig-75_1371_1	Aminoglycosides	171	94	59
Total Sewage	contig-75_1371_3	Aminocoumarin	513	236	188
Total Sewage	contig-75_1371_3	Aminocoumarin	513	236	188
Total Sewage	contig-75_1371_3	Aminocoumarin	513	236	188
Total Sewage	contig-75_1371_3	Aminoglycosides	513	236	188
Total Sewage	contig-75_1371_3	Aminoglycosides	513	236	188
Total Sewage	contig-75_1371_3	Aminoglycosides	513	236	188
Total Sewage	contig-75_13727_1	Macrolide	30	61	25
Total Sewage	contig-75_13727_1	Macrolide	30	61	25
Total Sewage	contig-75_13727_1	Macrolide	30	61	25
Total Sewage	contig-75_13734_1	Macrolide	0	0	0
Total Sewage	contig-75_13734_1	Macrolide	0	0	0
Total Sewage	contig-75_13734_1	Macrolide	0	0	0
Total Sewage	contig-75_1374_4	Aminocoumarin	10	31	21
Total Sewage	contig-75_1374_4	Aminocoumarin	10	31	21
Total Sewage	contig-75_1374_4	Aminocoumarin	10	31	21
Total Sewage	contig-75_13740_1	Vancomycin	557	1088	962
Total Sewage	contig-75_13740_1	Vancomycin	557	1088	962
Total Sewage	contig-75_13740_1	Vancomycin	557	1088	962
Total Sewage	contig-75_13751_1	Streptogramin	100	287	202
Total Sewage	contig-75_13751_1	Streptogramin	100	287	202
Total Sewage	contig-75_13751_1	Streptogramin	100	287	202
Total Sewage	contig-75_13762_2	Fosmidomycin	0	12	17
Total Sewage	contig-75_13762_2	Fosmidomycin	0	12	17
Total Sewage	contig-75_13762_2	Fosmidomycin	0	12	17
Total Sewage	contig-75_13779_1	Aminocoumarin	0	0	10
Total Sewage	contig-75_13779_1	Aminocoumarin	0	0	10
Total Sewage	contig-75_13779_1	Aminocoumarin	0	0	10
Total Sewage	contig-75_138_5	Streptomycin	0	0	0
Total Sewage	contig-75_138_5	Streptomycin	0	0	0
Total Sewage	contig-75_138_5	Streptomycin	0	0	0
Total Sewage	contig-75_13824_2	Lincosamide	0	0	0
Total Sewage	contig-75_13824_2	Lincosamide	0	0	0
Total Sewage	contig-75_13824_2	Lincosamide	0	0	0
Total Sewage	contig-75_13859_2	Ciprofloxacin	13	12	0
Total Sewage	contig-75_13859_2	Ciprofloxacin	13	12	0
Total Sewage	contig-75_13859_2	Ciprofloxacin	13	12	0
Total Sewage	contig-75_13859_2	Norfloxacin	13	12	0
Total Sewage	contig-75_13859_2	Norfloxacin	13	12	0
Total Sewage	contig-75_13859_2	Norfloxacin	13	12	0
Total Sewage	contig-75_13865_2	Teicoplanin	623	926	962
Total Sewage	contig-75_13865_2	Teicoplanin	623	926	962
Total Sewage	contig-75_13865_2	Teicoplanin	623	926	962
Total Sewage	contig-75_13865_2	Vancomycin	623	926	962
Total Sewage	contig-75_13865_2	Vancomycin	623	926	962
Total Sewage	contig-75_13865_2	Vancomycin	623	926	962
Total Sewage	contig-75_13875_1	Tetracycline	245	177	306
Total Sewage	contig-75_13875_1	Tetracycline	245	177	306
Total Sewage	contig-75_13875_1	Tetracycline	245	177	306
Total Sewage	contig-75_13878_1	Bicyclomycin	90	56	94
Total Sewage	contig-75_13878_1	Bicyclomycin	90	56	94
Total Sewage	contig-75_13878_1	Bicyclomycin	90	56	94
Total Sewage	contig-75_13892_1	Aminocoumarin	0	0	0
Total Sewage	contig-75_13892_1	Aminocoumarin	0	0	0
Total Sewage	contig-75_13892_1	Aminocoumarin	0	0	0
Total Sewage	contig-75_139_16	Bacitracin	0	0	10
Total Sewage	contig-75_139_16	Bacitracin	0	0	10
Total Sewage	contig-75_139_16	Bacitracin	0	0	10
Total Sewage	contig-75_139_3	Beta Lactams	0	0	0
Total Sewage	contig-75_139_3	Beta Lactams	0	0	0
Total Sewage	contig-75_139_3	Beta Lactams	0	0	0
Total Sewage	contig-75_139_3	Chloramphenicol	0	0	0
Total Sewage	contig-75_139_3	Chloramphenicol	0	0	0
Total Sewage	contig-75_139_3	Chloramphenicol	0	0	0
Total Sewage	contig-75_139_3	Fluoroquinolones	0	0	0
Total Sewage	contig-75_139_3	Fluoroquinolones	0	0	0
Total Sewage	contig-75_139_3	Fluoroquinolones	0	0	0
Total Sewage	contig-75_139_3	Rifampin	0	0	0
Total Sewage	contig-75_139_3	Rifampin	0	0	0
Total Sewage	contig-75_139_3	Rifampin	0	0	0
Total Sewage	contig-75_139_3	Tetracycline	0	0	0
Total Sewage	contig-75_139_3	Tetracycline	0	0	0
Total Sewage	contig-75_139_3	Tetracycline	0	0	0
Total Sewage	contig-75_1392_4	Teicoplanin	0	10	10
Total Sewage	contig-75_1392_4	Teicoplanin	0	10	10
Total Sewage	contig-75_1392_4	Teicoplanin	0	10	10
Total Sewage	contig-75_1392_4	Vancomycin	0	10	10
Total Sewage	contig-75_1392_4	Vancomycin	0	10	10
Total Sewage	contig-75_1392_4	Vancomycin	0	10	10
Total Sewage	contig-75_1392_5	Aminoglycosides	0	0	0
Total Sewage	contig-75_1392_5	Aminoglycosides	0	0	0
Total Sewage	contig-75_1392_5	Aminoglycosides	0	0	0
Total Sewage	contig-75_1392_5	Kanamycin	0	0	0
Total Sewage	contig-75_1392_5	Kanamycin	0	0	0
Total Sewage	contig-75_1392_5	Kanamycin	0	0	0
Total Sewage	contig-75_13936_1	Mupirocin	22	141	155
Total Sewage	contig-75_13936_1	Mupirocin	22	141	155
Total Sewage	contig-75_13936_1	Mupirocin	22	141	155
Total Sewage	contig-75_1394_1	Macrolide	0	10	0
Total Sewage	contig-75_1394_1	Macrolide	0	10	0
Total Sewage	contig-75_1394_1	Macrolide	0	10	0
Total Sewage	contig-75_1394_2	Macrolide	0	22	21
Total Sewage	contig-75_1394_2	Macrolide	0	22	21
Total Sewage	contig-75_1394_2	Macrolide	0	22	21
Total Sewage	contig-75_1394_3	Aminoglycosides	13	10	0
Total Sewage	contig-75_1394_3	Aminoglycosides	13	10	0
Total Sewage	contig-75_1394_3	Aminoglycosides	13	10	0
Total Sewage	contig-75_1394_3	Beta Lactams	13	10	0
Total Sewage	contig-75_1394_3	Beta Lactams	13	10	0
Total Sewage	contig-75_1394_3	Beta Lactams	13	10	0
Total Sewage	contig-75_1394_3	Fluoroquinolones	13	10	0
[truncated: 10,634 more rows]
