# Supplementary material for: Accumulation and expression of multiple antibiotic resistance genes in Arcobacter cryaerophilus that thrives in sewage
Source: PeerJ. 2017 Apr 25;5:e3269. doi: 10.7717/peerj.3269 (PMC5407278; doi:10.7717/peerj.3269)
Supplement: Data Set S3 [file peerj-05-3269-s004.xlsx]

## Sheet: Sheet1
Organism A: Arcobacter cryaerophilus, Organism B: Arcobacter butzleri RM4018
Presence	Category	Subcategory	Subsystem	Role	Organism A	SS active A	Organism B	SS active B
A and B	Amino Acids and Derivatives	Alanine, serine, and glycine	Alanine biosynthesis	Alanine racemase (EC 5.1.1.1)	fig|28198.16.peg.1318	yes	fig|367737.4.peg.774	yes
A and B	Amino Acids and Derivatives	Alanine, serine, and glycine	Alanine biosynthesis	Branched-chain amino acid aminotransferase (EC 2.6.1.42)	fig|28198.16.peg.1401,fig|28198.16.peg.1820	yes	fig|367737.4.peg.118	yes
A and B	Amino Acids and Derivatives	Alanine, serine, and glycine	Alanine biosynthesis	Cysteine desulfurase (EC 2.8.1.7)	fig|28198.16.peg.702,fig|28198.16.peg.727	yes	fig|367737.4.peg.595,fig|367737.4.peg.599	yes
A and B	Amino Acids and Derivatives	Alanine, serine, and glycine	Glycine Biosynthesis	Serine hydroxymethyltransferase (EC 2.1.2.1)	fig|28198.16.peg.1428	yes	fig|367737.4.peg.1437,fig|367737.4.peg.640	yes
A and B	Amino Acids and Derivatives	Alanine, serine, and glycine	Glycine and Serine Utilization	Cystathionine gamma-lyase (EC 4.4.1.1)	fig|28198.16.peg.235	yes	fig|367737.4.peg.1696	yes
A and B	Amino Acids and Derivatives	Alanine, serine, and glycine	Glycine and Serine Utilization	D-3-phosphoglycerate dehydrogenase (EC 1.1.1.95)	fig|28198.16.peg.275	yes	fig|367737.4.peg.1993	yes
A and B	Amino Acids and Derivatives	Alanine, serine, and glycine	Glycine and Serine Utilization	Phosphoserine aminotransferase (EC 2.6.1.52)	fig|28198.16.peg.300	yes	fig|367737.4.peg.134	yes
A and B	Amino Acids and Derivatives	Alanine, serine, and glycine	Glycine and Serine Utilization	Phosphoserine phosphatase (EC 3.1.3.3)	fig|28198.16.peg.1522	yes	fig|367737.4.peg.213	yes
A and B	Amino Acids and Derivatives	Alanine, serine, and glycine	Glycine and Serine Utilization	Serine hydroxymethyltransferase (EC 2.1.2.1)	fig|28198.16.peg.1428	yes	fig|367737.4.peg.1437,fig|367737.4.peg.640	yes
A and B	Amino Acids and Derivatives	Alanine, serine, and glycine	Glycine and Serine Utilization	Seryl-tRNA synthetase (EC 6.1.1.11)	fig|28198.16.peg.1095	yes	fig|367737.4.peg.338	yes
A and B	Amino Acids and Derivatives	Alanine, serine, and glycine	Serine Biosynthesis	D-3-phosphoglycerate dehydrogenase (EC 1.1.1.95)	fig|28198.16.peg.275	yes	fig|367737.4.peg.1993	yes
A and B	Amino Acids and Derivatives	Alanine, serine, and glycine	Serine Biosynthesis	Phosphoserine aminotransferase (EC 2.6.1.52)	fig|28198.16.peg.300	yes	fig|367737.4.peg.134	yes
A and B	Amino Acids and Derivatives	Alanine, serine, and glycine	Serine Biosynthesis	Phosphoserine phosphatase (EC 3.1.3.3)	fig|28198.16.peg.1522,fig|28198.16.peg.1522	yes	fig|367737.4.peg.213	yes
A and B	Amino Acids and Derivatives	Alanine, serine, and glycine	Serine Biosynthesis	Serine hydroxymethyltransferase (EC 2.1.2.1)	fig|28198.16.peg.1428	yes	fig|367737.4.peg.1437,fig|367737.4.peg.640	yes
A	Amino Acids and Derivatives	Alanine, serine, and glycine	Alanine biosynthesis	Iron-sulfur cluster regulator IscR	fig|28198.16.peg.1619	yes		no
A and B	Amino Acids and Derivatives	Arginine; urea cycle, polyamines	Arginine Biosynthesis -- gjo	Acetylglutamate kinase (EC 2.7.2.8)	fig|28198.16.peg.1912	yes	fig|367737.4.peg.2013	yes
A and B	Amino Acids and Derivatives	Arginine; urea cycle, polyamines	Arginine Biosynthesis -- gjo	Acetylornithine aminotransferase (EC 2.6.1.11)	fig|28198.16.peg.743,fig|28198.16.peg.744	yes	fig|367737.4.peg.1444,fig|367737.4.peg.251	yes
A and B	Amino Acids and Derivatives	Arginine; urea cycle, polyamines	Arginine Biosynthesis -- gjo	Argininosuccinate lyase (EC 4.3.2.1)	fig|28198.16.peg.717	yes	fig|367737.4.peg.603	yes
A and B	Amino Acids and Derivatives	Arginine; urea cycle, polyamines	Arginine Biosynthesis -- gjo	Argininosuccinate synthase (EC 6.3.4.5)	fig|28198.16.peg.1005,fig|28198.16.peg.1006	yes	fig|367737.4.peg.1260	yes
A and B	Amino Acids and Derivatives	Arginine; urea cycle, polyamines	Arginine Biosynthesis -- gjo	Glutamate N-acetyltransferase (EC 2.3.1.35)	fig|28198.16.peg.1205	yes	fig|367737.4.peg.1759	yes
A and B	Amino Acids and Derivatives	Arginine; urea cycle, polyamines	Arginine Biosynthesis -- gjo	N-acetyl-gamma-glutamyl-phosphate reductase (EC 1.2.1.38)	fig|28198.16.peg.1292	yes	fig|367737.4.peg.972	yes
A and B	Amino Acids and Derivatives	Arginine; urea cycle, polyamines	Arginine Biosynthesis -- gjo	N-acetylglutamate synthase (EC 2.3.1.1)	fig|28198.16.peg.1123,fig|28198.16.peg.1205	yes	fig|367737.4.peg.1759	yes
A and B	Amino Acids and Derivatives	Arginine; urea cycle, polyamines	Arginine Biosynthesis -- gjo	Ornithine carbamoyltransferase (EC 2.1.3.3)	fig|28198.16.peg.46	yes	fig|367737.4.peg.1226	yes
A and B	Amino Acids and Derivatives	Arginine; urea cycle, polyamines	Arginine Biosynthesis extended	Acetylglutamate kinase (EC 2.7.2.8)	fig|28198.16.peg.1912	yes	fig|367737.4.peg.2013	yes
A and B	Amino Acids and Derivatives	Arginine; urea cycle, polyamines	Arginine Biosynthesis extended	Acetylornithine aminotransferase (EC 2.6.1.11)	fig|28198.16.peg.743,fig|28198.16.peg.744	yes	fig|367737.4.peg.1444,fig|367737.4.peg.251	yes
A and B	Amino Acids and Derivatives	Arginine; urea cycle, polyamines	Arginine Biosynthesis extended	Argininosuccinate lyase (EC 4.3.2.1)	fig|28198.16.peg.717	yes	fig|367737.4.peg.603	yes
A and B	Amino Acids and Derivatives	Arginine; urea cycle, polyamines	Arginine Biosynthesis extended	Argininosuccinate synthase (EC 6.3.4.5)	fig|28198.16.peg.1005,fig|28198.16.peg.1006	yes	fig|367737.4.peg.1260	yes
A and B	Amino Acids and Derivatives	Arginine; urea cycle, polyamines	Arginine Biosynthesis extended	Glutamate N-acetyltransferase (EC 2.3.1.35)	fig|28198.16.peg.1205	yes	fig|367737.4.peg.1759	yes
A and B	Amino Acids and Derivatives	Arginine; urea cycle, polyamines	Arginine Biosynthesis extended	N-acetyl-gamma-glutamyl-phosphate reductase (EC 1.2.1.38)	fig|28198.16.peg.1292	yes	fig|367737.4.peg.972	yes
A and B	Amino Acids and Derivatives	Arginine; urea cycle, polyamines	Arginine Biosynthesis extended	N-acetylglutamate synthase (EC 2.3.1.1)	fig|28198.16.peg.1123,fig|28198.16.peg.1205	yes	fig|367737.4.peg.1759	yes
A and B	Amino Acids and Derivatives	Arginine; urea cycle, polyamines	Arginine Biosynthesis extended	Ornithine carbamoyltransferase (EC 2.1.3.3)	fig|28198.16.peg.46	yes	fig|367737.4.peg.1226	yes
A and B	Amino Acids and Derivatives	Arginine; urea cycle, polyamines	Arginine and Ornithine Degradation	Arginine decarboxylase (EC 4.1.1.19)	fig|28198.16.peg.611,fig|28198.16.peg.612	yes	fig|367737.4.peg.950	yes
A and B	Amino Acids and Derivatives	Arginine; urea cycle, polyamines	Arginine and Ornithine Degradation	NADP-specific glutamate dehydrogenase (EC 1.4.1.4)	fig|28198.16.peg.1134	yes	fig|367737.4.peg.280	yes
A and B	Amino Acids and Derivatives	Arginine; urea cycle, polyamines	Arginine and Ornithine Degradation	Ornithine aminotransferase (EC 2.6.1.13)	fig|28198.16.peg.744	yes	fig|367737.4.peg.1444,fig|367737.4.peg.251	yes
A and B	Amino Acids and Derivatives	Arginine; urea cycle, polyamines	Arginine and Ornithine Degradation	Ornithine carbamoyltransferase (EC 2.1.3.3)	fig|28198.16.peg.46	yes	fig|367737.4.peg.1226	yes
A and B	Amino Acids and Derivatives	Arginine; urea cycle, polyamines	Arginine and Ornithine Degradation	Succinylornithine transaminase (EC 2.6.1.81)	fig|28198.16.peg.744	yes	fig|367737.4.peg.1444,fig|367737.4.peg.251	yes
A and B	Amino Acids and Derivatives	Arginine; urea cycle, polyamines	Polyamine Metabolism	Arginine decarboxylase (EC 4.1.1.19)	fig|28198.16.peg.611,fig|28198.16.peg.612	yes	fig|367737.4.peg.950	yes
A and B	Amino Acids and Derivatives	Arginine; urea cycle, polyamines	Polyamine Metabolism	Putrescine transport ATP-binding protein PotA (TC 3.A.1.11.1)	fig|28198.16.peg.1312	yes	fig|367737.4.peg.1952	yes
A and B	Amino Acids and Derivatives	Arginine; urea cycle, polyamines	Polyamine Metabolism	Spermidine synthase (EC 2.5.1.16)	fig|28198.16.peg.289	yes	fig|367737.4.peg.142	yes
A	Amino Acids and Derivatives	Arginine; urea cycle, polyamines	Arginine Deiminase Pathway	Arginine/ornithine antiporter ArcD	fig|28198.16.peg.904,fig|28198.16.peg.1024,fig|28198.16.peg.1316,fig|28198.16.peg.1429,fig|28198.16.peg.1697,fig|28198.16.peg.1954	yes		no
A	Amino Acids and Derivatives	Arginine; urea cycle, polyamines	Polyamine Metabolism	Carboxynorspermidine dehydrogenase, putative (EC 1.1.1.-)	fig|28198.16.peg.1606	yes		no
B	Amino Acids and Derivatives	Arginine; urea cycle, polyamines	Arginine Biosynthesis -- gjo	N-succinyl-L,L-diaminopimelate desuccinylase (EC 3.5.1.18)		no	fig|367737.4.peg.1138	yes
B	Amino Acids and Derivatives	Arginine; urea cycle, polyamines	Arginine and Ornithine Degradation	Agmatinase (EC 3.5.3.11)		no	fig|367737.4.peg.1542	yes
B	Amino Acids and Derivatives	Arginine; urea cycle, polyamines	Urea decomposition	Urea ABC transporter, ATPase protein UrtD		no	fig|367737.4.peg.790	yes
B	Amino Acids and Derivatives	Arginine; urea cycle, polyamines	Urea decomposition	Urea ABC transporter, ATPase protein UrtE		no	fig|367737.4.peg.791	yes
B	Amino Acids and Derivatives	Arginine; urea cycle, polyamines	Urea decomposition	Urea ABC transporter, permease protein UrtB		no	fig|367737.4.peg.788	yes
B	Amino Acids and Derivatives	Arginine; urea cycle, polyamines	Urea decomposition	Urea ABC transporter, permease protein UrtC		no	fig|367737.4.peg.789	yes
B	Amino Acids and Derivatives	Arginine; urea cycle, polyamines	Urea decomposition	Urea ABC transporter, substrate binding protein UrtA		no	fig|367737.4.peg.787	yes
B	Amino Acids and Derivatives	Arginine; urea cycle, polyamines	Urease subunits	Urease accessory protein UreD		no	fig|367737.4.peg.793	yes
A and B	Amino Acids and Derivatives	Aromatic amino acids and derivatives	Chorismate: Intermediate for synthesis of Tryptophan, PAPA antibiotics, PABA, 3-hydroxyanthranilate and more.	Anthranilate phosphoribosyltransferase (EC 2.4.2.18)	fig|28198.16.peg.104,fig|28198.16.peg.827	yes	fig|367737.4.peg.1257	yes
A and B	Amino Acids and Derivatives	Aromatic amino acids and derivatives	Chorismate: Intermediate for synthesis of Tryptophan, PAPA antibiotics, PABA, 3-hydroxyanthranilate and more.	Anthranilate synthase, amidotransferase component (EC 4.1.3.27)	fig|28198.16.peg.1315	yes	fig|367737.4.peg.1949	yes
A and B	Amino Acids and Derivatives	Aromatic amino acids and derivatives	Chorismate: Intermediate for synthesis of Tryptophan, PAPA antibiotics, PABA, 3-hydroxyanthranilate and more.	Anthranilate synthase, aminase component (EC 4.1.3.27)	fig|28198.16.peg.1430	yes	fig|367737.4.peg.638	yes
A and B	Amino Acids and Derivatives	Aromatic amino acids and derivatives	Chorismate: Intermediate for synthesis of Tryptophan, PAPA antibiotics, PABA, 3-hydroxyanthranilate and more.	Indole-3-glycerol phosphate synthase (EC 4.1.1.48)	fig|28198.16.peg.769	yes	fig|367737.4.peg.834	yes
A and B	Amino Acids and Derivatives	Aromatic amino acids and derivatives	Chorismate: Intermediate for synthesis of Tryptophan, PAPA antibiotics, PABA, 3-hydroxyanthranilate and more.	Isochorismatase (EC 3.3.2.1)	fig|28198.16.peg.1140	yes	fig|367737.4.peg.255,fig|367737.4.peg.274	yes
A and B	Amino Acids and Derivatives	Aromatic amino acids and derivatives	Chorismate: Intermediate for synthesis of Tryptophan, PAPA antibiotics, PABA, 3-hydroxyanthranilate and more.	Para-aminobenzoate synthase, amidotransferase component (EC 2.6.1.85)	fig|28198.16.peg.1315	yes	fig|367737.4.peg.1949	yes
A and B	Amino Acids and Derivatives	Aromatic amino acids and derivatives	Chorismate: Intermediate for synthesis of Tryptophan, PAPA antibiotics, PABA, 3-hydroxyanthranilate and more.	Phosphoribosylanthranilate isomerase (EC 5.3.1.24)	fig|28198.16.peg.778	yes	fig|367737.4.peg.843	yes
A and B	Amino Acids and Derivatives	Aromatic amino acids and derivatives	Chorismate: Intermediate for synthesis of Tryptophan, PAPA antibiotics, PABA, 3-hydroxyanthranilate and more.	Tryptophan synthase alpha chain (EC 4.2.1.20)	fig|28198.16.peg.999	yes	fig|367737.4.peg.1747	yes
A and B	Amino Acids and Derivatives	Aromatic amino acids and derivatives	Chorismate: Intermediate for synthesis of Tryptophan, PAPA antibiotics, PABA, 3-hydroxyanthranilate and more.	Tryptophan synthase beta chain (EC 4.2.1.20)	fig|28198.16.peg.239	yes	fig|367737.4.peg.686	yes
A and B	Amino Acids and Derivatives	Aromatic amino acids and derivatives	Chorismate: Intermediate for synthesis of Tryptophan, PAPA antibiotics, PABA, 3-hydroxyanthranilate and more.	Tryptophan synthase beta chain like (EC 4.2.1.20)	fig|28198.16.peg.1480	yes	fig|367737.4.peg.1276	yes
A and B	Amino Acids and Derivatives	Aromatic amino acids and derivatives	Common Pathway For Synthesis of Aromatic Compounds (DAHP synthase to chorismate)	3-dehydroquinate dehydratase II (EC 4.2.1.10)	fig|28198.16.peg.1378	yes	fig|367737.4.peg.481	yes
A and B	Amino Acids and Derivatives	Aromatic amino acids and derivatives	Common Pathway For Synthesis of Aromatic Compounds (DAHP synthase to chorismate)	3-dehydroquinate synthase (EC 4.2.3.4)	fig|28198.16.peg.92	yes	fig|367737.4.peg.1113	yes
A and B	Amino Acids and Derivatives	Aromatic amino acids and derivatives	Common Pathway For Synthesis of Aromatic Compounds (DAHP synthase to chorismate)	Shikimate kinase I (EC 2.7.1.71)	fig|28198.16.peg.1812	yes	fig|367737.4.peg.376	yes
A and B	Amino Acids and Derivatives	Aromatic amino acids and derivatives	Phenylalanine and Tyrosine Branches from Chorismate	Biosynthetic Aromatic amino acid aminotransferase beta (EC 2.6.1.57)	fig|28198.16.peg.1470,fig|28198.16.peg.1471	yes	fig|367737.4.peg.2078	yes
A and B	Amino Acids and Derivatives	Aromatic amino acids and derivatives	Phenylalanine and Tyrosine Branches from Chorismate	Chorismate mutase I (EC 5.4.99.5)	fig|28198.16.peg.1469	yes	fig|367737.4.peg.2077	yes
A and B	Amino Acids and Derivatives	Aromatic amino acids and derivatives	Phenylalanine and Tyrosine Branches from Chorismate	Prephenate dehydratase (EC 4.2.1.51)	fig|28198.16.peg.1469	yes	fig|367737.4.peg.2077	yes
A and B	Amino Acids and Derivatives	Aromatic amino acids and derivatives	Tryptophan synthesis	Anthranilate phosphoribosyltransferase (EC 2.4.2.18)	fig|28198.16.peg.104,fig|28198.16.peg.827	yes	fig|367737.4.peg.1257	yes
A and B	Amino Acids and Derivatives	Aromatic amino acids and derivatives	Tryptophan synthesis	Anthranilate synthase, amidotransferase component (EC 4.1.3.27)	fig|28198.16.peg.1315	yes	fig|367737.4.peg.1949	yes
A and B	Amino Acids and Derivatives	Aromatic amino acids and derivatives	Tryptophan synthesis	Anthranilate synthase, aminase component (EC 4.1.3.27)	fig|28198.16.peg.1430	yes	fig|367737.4.peg.638	yes
A and B	Amino Acids and Derivatives	Aromatic amino acids and derivatives	Tryptophan synthesis	Indole-3-glycerol phosphate synthase (EC 4.1.1.48)	fig|28198.16.peg.769	yes	fig|367737.4.peg.834	yes
A and B	Amino Acids and Derivatives	Aromatic amino acids and derivatives	Tryptophan synthesis	Para-aminobenzoate synthase, amidotransferase component (EC 2.6.1.85)	fig|28198.16.peg.1315	yes	fig|367737.4.peg.1949	yes
A and B	Amino Acids and Derivatives	Aromatic amino acids and derivatives	Tryptophan synthesis	Phosphoribosylanthranilate isomerase (EC 5.3.1.24)	fig|28198.16.peg.778	yes	fig|367737.4.peg.843	yes
A and B	Amino Acids and Derivatives	Aromatic amino acids and derivatives	Tryptophan synthesis	Tryptophan synthase alpha chain (EC 4.2.1.20)	fig|28198.16.peg.999	yes	fig|367737.4.peg.1747	yes
A and B	Amino Acids and Derivatives	Aromatic amino acids and derivatives	Tryptophan synthesis	Tryptophan synthase beta chain (EC 4.2.1.20)	fig|28198.16.peg.239	yes	fig|367737.4.peg.686	yes
A	Amino Acids and Derivatives	Aromatic amino acids and derivatives	Chorismate: Intermediate for synthesis of Tryptophan, PAPA antibiotics, PABA, 3-hydroxyanthranilate and more.	Isochorismate pyruvate-lyase (EC 4.-.-.-)	fig|28198.16.peg.905	yes		no
B	Amino Acids and Derivatives	Aromatic amino acids and derivatives	Chorismate: Intermediate for synthesis of Tryptophan, PAPA antibiotics, PABA, 3-hydroxyanthranilate and more.	Para-aminobenzoate synthase, aminase component (EC 2.6.1.85)		no	fig|367737.4.peg.254	yes
B	Amino Acids and Derivatives	Aromatic amino acids and derivatives	Chorismate: Intermediate for synthesis of Tryptophan, PAPA antibiotics, PABA, 3-hydroxyanthranilate and more.	Phosphoribosylformimino-5-aminoimidazole carboxamide ribotide isomerase (EC 5.3.1.16)		no	fig|367737.4.peg.466	yes
B	Amino Acids and Derivatives	Aromatic amino acids and derivatives	Chorismate Synthesis	2-Keto-3-deoxy-D-manno-octulosonate-8-phosphate synthase (EC 2.5.1.55)		no	fig|367737.4.peg.1813	yes
B	Amino Acids and Derivatives	Aromatic amino acids and derivatives	Chorismate Synthesis	2-keto-3-deoxy-D-arabino-heptulosonate-7-phosphate synthase II (EC 2.5.1.54)		no	fig|367737.4.peg.215	yes
B	Amino Acids and Derivatives	Aromatic amino acids and derivatives	Chorismate Synthesis	5-Enolpyruvylshikimate-3-phosphate synthase (EC 2.5.1.19)		no	fig|367737.4.peg.1996	yes
B	Amino Acids and Derivatives	Aromatic amino acids and derivatives	Chorismate Synthesis	Chorismate synthase (EC 4.2.3.5)		no	fig|367737.4.peg.1587	yes
B	Amino Acids and Derivatives	Aromatic amino acids and derivatives	Chorismate Synthesis	Prephenate and/or arogenate dehydrogenase (unknown specificity) (EC 1.3.1.12)(EC 1.3.1.43)		no	fig|367737.4.peg.1196	yes
B	Amino Acids and Derivatives	Aromatic amino acids and derivatives	Chorismate Synthesis	Shikimate 5-dehydrogenase I alpha (EC 1.1.1.25)		no	fig|367737.4.peg.1061	yes
A and B	Amino Acids and Derivatives	Branched-chain amino acids	Branched-Chain Amino Acid Biosynthesis	3-isopropylmalate dehydratase large subunit (EC 4.2.1.33)	fig|28198.16.peg.766,fig|28198.16.peg.1821	yes	fig|367737.4.peg.79	yes
A and B	Amino Acids and Derivatives	Branched-chain amino acids	Branched-Chain Amino Acid Biosynthesis	3-isopropylmalate dehydratase small subunit (EC 4.2.1.33)	fig|28198.16.peg.1294	yes	fig|367737.4.peg.998	yes
A and B	Amino Acids and Derivatives	Branched-chain amino acids	Branched-Chain Amino Acid Biosynthesis	3-isopropylmalate dehydrogenase (EC 1.1.1.85)	fig|28198.16.peg.1105	yes	fig|367737.4.peg.999	yes
A and B	Amino Acids and Derivatives	Branched-chain amino acids	Branched-Chain Amino Acid Biosynthesis	Acetolactate synthase large subunit (EC 2.2.1.6)	fig|28198.16.peg.13,fig|28198.16.peg.891	yes	fig|367737.4.peg.1144	yes
A and B	Amino Acids and Derivatives	Branched-chain amino acids	Branched-Chain Amino Acid Biosynthesis	Acetolactate synthase small subunit (EC 2.2.1.6)	fig|28198.16.peg.12	yes	fig|367737.4.peg.1145	yes
A and B	Amino Acids and Derivatives	Branched-chain amino acids	Branched-Chain Amino Acid Biosynthesis	Branched-chain amino acid aminotransferase (EC 2.6.1.42)	fig|28198.16.peg.1401,fig|28198.16.peg.1820	yes	fig|367737.4.peg.118	yes
A and B	Amino Acids and Derivatives	Branched-chain amino acids	Branched-Chain Amino Acid Biosynthesis	Dihydroxy-acid dehydratase (EC 4.2.1.9)	fig|28198.16.peg.499	yes	fig|367737.4.peg.2044	yes
A and B	Amino Acids and Derivatives	Branched-chain amino acids	Branched-Chain Amino Acid Biosynthesis	Ketol-acid reductoisomerase (EC 1.1.1.86)	fig|28198.16.peg.1647,fig|28198.16.peg.1648	yes	fig|367737.4.peg.229	yes
A and B	Amino Acids and Derivatives	Branched-chain amino acids	Branched-Chain Amino Acid Biosynthesis	Threonine dehydratase (EC 4.3.1.19)	fig|28198.16.peg.1033	yes	fig|367737.4.peg.1974	yes
A and B	Amino Acids and Derivatives	Branched-chain amino acids	Leucine Biosynthesis	3-isopropylmalate dehydratase large subunit (EC 4.2.1.33)	fig|28198.16.peg.766,fig|28198.16.peg.1821	yes	fig|367737.4.peg.79	yes
A and B	Amino Acids and Derivatives	Branched-chain amino acids	Leucine Biosynthesis	3-isopropylmalate dehydratase small subunit (EC 4.2.1.33)	fig|28198.16.peg.1294	yes	fig|367737.4.peg.998	yes
A and B	Amino Acids and Derivatives	Branched-chain amino acids	Leucine Biosynthesis	3-isopropylmalate dehydrogenase (EC 1.1.1.85)	fig|28198.16.peg.1105	yes	fig|367737.4.peg.999	yes
A and B	Amino Acids and Derivatives	Branched-chain amino acids	Leucine Biosynthesis	Branched-chain amino acid aminotransferase (EC 2.6.1.42)	fig|28198.16.peg.1401,fig|28198.16.peg.1820	yes	fig|367737.4.peg.118	yes
A and B	Amino Acids and Derivatives	Glutamine, glutamate, aspartate, asparagine; ammonia assimilation	Glutamate dehydrogenases	NADP-specific glutamate dehydrogenase (EC 1.4.1.4)	fig|28198.16.peg.1134	yes	fig|367737.4.peg.280	yes
A and B	Amino Acids and Derivatives	Glutamine, glutamate, aspartate, asparagine; ammonia assimilation	Glutamine, Glutamate, Aspartate and Asparagine Biosynthesis	Aspartate aminotransferase (EC 2.6.1.1)	fig|28198.16.peg.944,fig|28198.16.peg.1584,fig|28198.16.peg.1852,fig|28198.16.peg.1932	yes	fig|367737.4.peg.156,fig|367737.4.peg.1967,fig|367737.4.peg.910	yes
A and B	Amino Acids and Derivatives	Glutamine, glutamate, aspartate, asparagine; ammonia assimilation	Glutamine, Glutamate, Aspartate and Asparagine Biosynthesis	Glutamate racemase (EC 5.1.1.3)	fig|28198.16.peg.1135	yes	fig|367737.4.peg.279	yes
A and B	Amino Acids and Derivatives	Glutamine, glutamate, aspartate, asparagine; ammonia assimilation	Glutamine, Glutamate, Aspartate and Asparagine Biosynthesis	Glutamate synthase [NADPH] large chain (EC 1.4.1.13)	fig|28198.16.peg.550	yes	fig|367737.4.peg.1796	yes
A and B	Amino Acids and Derivatives	Glutamine, glutamate, aspartate, asparagine; ammonia assimilation	Glutamine, Glutamate, Aspartate and Asparagine Biosynthesis	Glutamine synthetase type I (EC 6.3.1.2)	fig|28198.16.peg.1160,fig|28198.16.peg.1161,fig|28198.16.peg.1937	yes	fig|367737.4.peg.1858	yes
A and B	Amino Acids and Derivatives	Glutamine, glutamate, aspartate, asparagine; ammonia assimilation	Glutamine, Glutamate, Aspartate and Asparagine Biosynthesis	NADP-specific glutamate dehydrogenase (EC 1.4.1.4)	fig|28198.16.peg.1134	yes	fig|367737.4.peg.280	yes
A and B	Amino Acids and Derivatives	Glutamine, glutamate, aspartate, asparagine; ammonia assimilation	Glutamine synthetases	Glutamine synthetase type I (EC 6.3.1.2)	fig|28198.16.peg.1160,fig|28198.16.peg.1161,fig|28198.16.peg.1937	yes	fig|367737.4.peg.1858	yes
B	Amino Acids and Derivatives	Glutamine, glutamate, aspartate, asparagine; ammonia assimilation	Glutamate and Aspartate uptake in Bacteria	Asparagine synthetase [glutamine-hydrolyzing] (EC 6.3.5.4)		no	fig|367737.4.peg.45,fig|367737.4.peg.655,fig|367737.4.peg.665	yes
B	Amino Acids and Derivatives	Glutamine, glutamate, aspartate, asparagine; ammonia assimilation	Glutamate and Aspartate uptake in Bacteria	Sodium/glutamate symport protein		no	fig|367737.4.peg.210	yes
B	Amino Acids and Derivatives	Glutamine, glutamate, aspartate, asparagine; ammonia assimilation	Glutamine, Glutamate, Aspartate and Asparagine Biosynthesis	Aspartate ammonia-lyase (EC 4.3.1.1)		no	fig|367737.4.peg.1554	yes
B	Amino Acids and Derivatives	Glutamine, glutamate, aspartate, asparagine; ammonia assimilation	Glutamine, Glutamate, Aspartate and Asparagine Biosynthesis	Glutaminase (EC 3.5.1.2)		no	fig|367737.4.peg.2268	yes
B	Amino Acids and Derivatives	Histidine Metabolism	Histidine Biosynthesis	Histidinol dehydrogenase (EC 1.1.1.23)		no	fig|367737.4.peg.377	yes
A and B	Amino Acids and Derivatives	Lysine, threonine, methionine, and cysteine	Cysteine Biosynthesis	Cystathionine gamma-lyase (EC 4.4.1.1)	fig|28198.16.peg.235	yes	fig|367737.4.peg.1696	yes
A and B	Amino Acids and Derivatives	Lysine, threonine, methionine, and cysteine	Cysteine Biosynthesis	Cysteine synthase (EC 2.5.1.47)	fig|28198.16.peg.1620	yes	fig|367737.4.peg.2111,fig|367737.4.peg.2236	yes
A and B	Amino Acids and Derivatives	Lysine, threonine, methionine, and cysteine	Cysteine Biosynthesis	Phosphoadenylyl-sulfate reductase [thioredoxin] (EC 1.8.4.8)	fig|28198.16.peg.1622	yes	fig|367737.4.peg.2113	yes
A and B	Amino Acids and Derivatives	Lysine, threonine, methionine, and cysteine	Cysteine Biosynthesis	Serine acetyltransferase (EC 2.3.1.30)	fig|28198.16.peg.613,fig|28198.16.peg.1933	yes	fig|367737.4.peg.949	yes
A and B	Amino Acids and Derivatives	Lysine, threonine, methionine, and cysteine	Cysteine Biosynthesis	Sulfate adenylyltransferase subunit 2 (EC 2.7.7.4)	fig|28198.16.peg.1799	yes	fig|367737.4.peg.2114	yes
A and B	Amino Acids and Derivatives	Lysine, threonine, methionine, and cysteine	Cysteine Biosynthesis	Sulfate permease	fig|28198.16.peg.3,fig|28198.16.peg.1336	yes	fig|367737.4.peg.1163,fig|367737.4.peg.1267	yes
A and B	Amino Acids and Derivatives	Lysine, threonine, methionine, and cysteine	Cysteine Biosynthesis	Sulfate transport system permease protein CysT	fig|28198.16.peg.924	yes	fig|367737.4.peg.2235	yes
A and B	Amino Acids and Derivatives	Lysine, threonine, methionine, and cysteine	Cysteine Biosynthesis	Sulfate transport system permease protein CysW	fig|28198.16.peg.925	yes	fig|367737.4.peg.2234	yes
A and B	Amino Acids and Derivatives	Lysine, threonine, methionine, and cysteine	Lysine Biosynthesis DAP Pathway	4-hydroxy-tetrahydrodipicolinate reductase (EC 1.17.1.8)	fig|28198.16.peg.841	yes	fig|367737.4.peg.2033	yes
A and B	Amino Acids and Derivatives	Lysine, threonine, methionine, and cysteine	Lysine Biosynthesis DAP Pathway	4-hydroxy-tetrahydrodipicolinate synthase (EC 4.3.3.7)	fig|28198.16.peg.1269,fig|28198.16.peg.1833	yes	fig|367737.4.peg.858	yes
A and B	Amino Acids and Derivatives	Lysine, threonine, methionine, and cysteine	Lysine Biosynthesis DAP Pathway	Aspartate-semialdehyde dehydrogenase (EC 1.2.1.11)	fig|28198.16.peg.1705	yes	fig|367737.4.peg.1756	yes
A and B	Amino Acids and Derivatives	Lysine, threonine, methionine, and cysteine	Lysine Biosynthesis DAP Pathway	Aspartokinase (EC 2.7.2.4)	fig|28198.16.peg.38,fig|28198.16.peg.39	yes	fig|367737.4.peg.1185	yes
A and B	Amino Acids and Derivatives	Lysine, threonine, methionine, and cysteine	Lysine Biosynthesis DAP Pathway	Diaminopimelate decarboxylase (EC 4.1.1.20)	fig|28198.16.peg.1898	yes	fig|367737.4.peg.2076	yes
A and B	Amino Acids and Derivatives	Lysine, threonine, methionine, and cysteine	Lysine Biosynthesis DAP Pathway	N-succinyl-L,L-diaminopimelate aminotransferase (EC 2.6.1.17)	fig|28198.16.peg.744	yes	fig|367737.4.peg.1444,fig|367737.4.peg.251	yes
A and B	Amino Acids and Derivatives	Lysine, threonine, methionine, and cysteine	Lysine Biosynthesis DAP Pathway, GJO scratch	4-hydroxy-tetrahydrodipicolinate reductase (EC 1.17.1.8)	fig|28198.16.peg.841	yes	fig|367737.4.peg.2033	yes
A and B	Amino Acids and Derivatives	Lysine, threonine, methionine, and cysteine	Lysine Biosynthesis DAP Pathway, GJO scratch	4-hydroxy-tetrahydrodipicolinate synthase (EC 4.3.3.7)	fig|28198.16.peg.1269,fig|28198.16.peg.1833	yes	fig|367737.4.peg.858	yes
A and B	Amino Acids and Derivatives	Lysine, threonine, methionine, and cysteine	Lysine Biosynthesis DAP Pathway, GJO scratch	Aspartate-semialdehyde dehydrogenase (EC 1.2.1.11)	fig|28198.16.peg.1705	yes	fig|367737.4.peg.1756	yes
A and B	Amino Acids and Derivatives	Lysine, threonine, methionine, and cysteine	Lysine Biosynthesis DAP Pathway, GJO scratch	Aspartokinase (EC 2.7.2.4)	fig|28198.16.peg.38,fig|28198.16.peg.39	yes	fig|367737.4.peg.1185	yes
A and B	Amino Acids and Derivatives	Lysine, threonine, methionine, and cysteine	Lysine Biosynthesis DAP Pathway, GJO scratch	Diaminopimelate decarboxylase (EC 4.1.1.20)	fig|28198.16.peg.1898	yes	fig|367737.4.peg.2076	yes
A and B	Amino Acids and Derivatives	Lysine, threonine, methionine, and cysteine	Lysine Biosynthesis DAP Pathway, GJO scratch	N-succinyl-L,L-diaminopimelate aminotransferase (EC 2.6.1.17)	fig|28198.16.peg.744	yes	fig|367737.4.peg.1444,fig|367737.4.peg.251	yes
A and B	Amino Acids and Derivatives	Lysine, threonine, methionine, and cysteine	Methionine Degradation	Cystathionine gamma-lyase (EC 4.4.1.1)	fig|28198.16.peg.235	yes	fig|367737.4.peg.1696	yes
A and B	Amino Acids and Derivatives	Lysine, threonine, methionine, and cysteine	Methionine Degradation	Pyruvate dehydrogenase E1 component (EC 1.2.4.1)	fig|28198.16.peg.1664	yes	fig|367737.4.peg.1448	yes
A and B	Amino Acids and Derivatives	Lysine, threonine, methionine, and cysteine	Methionine Degradation	S-adenosylmethionine synthetase (EC 2.5.1.6)	fig|28198.16.peg.1303	yes	fig|367737.4.peg.438	yes
A and B	Amino Acids and Derivatives	Lysine, threonine, methionine, and cysteine	Methionine Degradation	S-ribosylhomocysteine lyase (EC 4.4.1.21)	fig|28198.16.peg.1021	yes	fig|367737.4.peg.111	yes
A and B	Amino Acids and Derivatives	Lysine, threonine, methionine, and cysteine	Threonine and Homoserine Biosynthesis	Aspartate aminotransferase (EC 2.6.1.1)	fig|28198.16.peg.944,fig|28198.16.peg.1584,fig|28198.16.peg.1852,fig|28198.16.peg.1932	yes	fig|367737.4.peg.156,fig|367737.4.peg.1967,fig|367737.4.peg.910	yes
A and B	Amino Acids and Derivatives	Lysine, threonine, methionine, and cysteine	Threonine and Homoserine Biosynthesis	Aspartate-semialdehyde dehydrogenase (EC 1.2.1.11)	fig|28198.16.peg.1705	yes	fig|367737.4.peg.1756	yes
A and B	Amino Acids and Derivatives	Lysine, threonine, methionine, and cysteine	Threonine and Homoserine Biosynthesis	Aspartokinase (EC 2.7.2.4)	fig|28198.16.peg.38,fig|28198.16.peg.39	yes	fig|367737.4.peg.1185	yes
A and B	Amino Acids and Derivatives	Lysine, threonine, methionine, and cysteine	Threonine and Homoserine Biosynthesis	Homoserine dehydrogenase (EC 1.1.1.3)	fig|28198.16.peg.1889	yes	fig|367737.4.peg.157	yes
A and B	Amino Acids and Derivatives	Lysine, threonine, methionine, and cysteine	Threonine and Homoserine Biosynthesis	Homoserine kinase (EC 2.7.1.39)	fig|28198.16.peg.260	yes	fig|367737.4.peg.1986	yes
A and B	Amino Acids and Derivatives	Lysine, threonine, methionine, and cysteine	Threonine degradation	Threonine dehydratase (EC 4.3.1.19)	fig|28198.16.peg.1033	yes	fig|367737.4.peg.1974	yes
A	Amino Acids and Derivatives	Lysine, threonine, methionine, and cysteine	Cysteine Biosynthesis	Sulfate and thiosulfate binding protein CysP	fig|28198.16.peg.919	yes		no
A	Amino Acids and Derivatives	Lysine, threonine, methionine, and cysteine	Lysine Biosynthesis DAP Pathway	Meso-diaminopimelate D-dehydrogenase (EC 1.4.1.16)	fig|28198.16.peg.52	yes		no
A	Amino Acids and Derivatives	Lysine, threonine, methionine, and cysteine	Methionine Biosynthesis	Methionine ABC transporter ATP-binding protein	fig|28198.16.peg.1019	yes		no
B	Amino Acids and Derivatives	Lysine, threonine, methionine, and cysteine	Cysteine Biosynthesis	Sulfate adenylyltransferase subunit 1 (EC 2.7.7.4)		no	fig|367737.4.peg.2115	yes
B	Amino Acids and Derivatives	Lysine, threonine, methionine, and cysteine	Cysteine Biosynthesis	Sulfate and thiosulfate import ATP-binding protein CysA (EC 3.6.3.25)		no	fig|367737.4.peg.2233	yes
B	Amino Acids and Derivatives	Lysine, threonine, methionine, and cysteine	Lysine Biosynthesis DAP Pathway	2,3,4,5-tetrahydropyridine-2,6-dicarboxylate N-succinyltransferase (EC 2.3.1.117)		no	fig|367737.4.peg.1370	yes
B	Amino Acids and Derivatives	Lysine, threonine, methionine, and cysteine	Lysine Biosynthesis DAP Pathway	Diaminopimelate epimerase (EC 5.1.1.7)		no	fig|367737.4.peg.144	yes
B	Amino Acids and Derivatives	Lysine, threonine, methionine, and cysteine	Lysine Biosynthesis DAP Pathway	N-succinyl-L,L-diaminopimelate aminotransferase alternative (EC 2.6.1.17)		no	fig|367737.4.peg.224	yes
B	Amino Acids and Derivatives	Lysine, threonine, methionine, and cysteine	Threonine and Homoserine Biosynthesis	Threonine synthase (EC 4.2.3.1)		no	fig|367737.4.peg.2012	yes
B	Amino Acids and Derivatives	Lysine, threonine, methionine, and cysteine	Threonine degradation	Threonine dehydrogenase and related Zn-dependent dehydrogenases		no	fig|367737.4.peg.1028	yes
B	Amino Acids and Derivatives	Polyamines	DAP (1,3-diaminopropane) production	Carboxynorspermidine decarboxylase		no	fig|367737.4.peg.1679	yes
A and B	Amino Acids and Derivatives	Proline and 4-hydroxyproline	Proline Synthesis	Gamma-glutamyl phosphate reductase (EC 1.2.1.41)	fig|28198.16.peg.349	yes	fig|367737.4.peg.1731	yes
A and B	Amino Acids and Derivatives	Proline and 4-hydroxyproline	Proline Synthesis	Glutamate 5-kinase (EC 2.7.2.11)	fig|28198.16.peg.313	yes	fig|367737.4.peg.1580	yes
A and B	Amino Acids and Derivatives	Proline and 4-hydroxyproline	Proline Synthesis	NADP-specific glutamate dehydrogenase (EC 1.4.1.4)	fig|28198.16.peg.1134	yes	fig|367737.4.peg.280	yes
A and B	Amino Acids and Derivatives	Proline and 4-hydroxyproline	Proline Synthesis	Pyrroline-5-carboxylate reductase (EC 1.5.1.2)	fig|28198.16.peg.1079	yes	fig|367737.4.peg.577	yes
A	Amino Acids and Derivatives	Proline and 4-hydroxyproline	A Hypothetical Protein Related to Proline Metabolism	Hypothetical protein YggS, proline synthase co-transcribed bacterial homolog PROSC	fig|28198.16.peg.1273	yes		no
A and B	Carbohydrates	Central carbohydrate metabolism	Glycolate, glyoxylate interconversions	Phosphoglycolate phosphatase (EC 3.1.3.18)	fig|28198.16.peg.1745	yes	fig|367737.4.peg.2093,fig|367737.4.peg.97	yes
A and B	Carbohydrates	Central carbohydrate metabolism	Glycolysis and Gluconeogenesis	2,3-bisphosphoglycerate-independent phosphoglycerate mutase (EC 5.4.2.1)	fig|28198.16.peg.811	yes	fig|367737.4.peg.1855	yes
A and B	Carbohydrates	Central carbohydrate metabolism	Glycolysis and Gluconeogenesis	Enolase (EC 4.2.1.11)	fig|28198.16.peg.1236,fig|28198.16.peg.1237,fig|28198.16.peg.1238	yes	fig|367737.4.peg.2181	yes
A and B	Carbohydrates	Central carbohydrate metabolism	Glycolysis and Gluconeogenesis	Fructose-1,6-bisphosphatase, type I (EC 3.1.3.11)	fig|28198.16.peg.150	yes	fig|367737.4.peg.1205	yes
A and B	Carbohydrates	Central carbohydrate metabolism	Glycolysis and Gluconeogenesis	Fructose-bisphosphate aldolase class II (EC 4.1.2.13)	fig|28198.16.peg.1032	yes	fig|367737.4.peg.370	yes
A and B	Carbohydrates	Central carbohydrate metabolism	Glycolysis and Gluconeogenesis	Glucose-6-phosphate isomerase (EC 5.3.1.9)	fig|28198.16.peg.1456	yes	fig|367737.4.peg.826	yes
A and B	Carbohydrates	Central carbohydrate metabolism	Glycolysis and Gluconeogenesis	NAD-dependent glyceraldehyde-3-phosphate dehydrogenase (EC 1.2.1.12)	fig|28198.16.peg.291,fig|28198.16.peg.292,fig|28198.16.peg.1464	yes	fig|367737.4.peg.2072	yes
A and B	Carbohydrates	Central carbohydrate metabolism	Glycolysis and Gluconeogenesis	Phosphoglycerate kinase (EC 2.7.2.3)	fig|28198.16.peg.1465,fig|28198.16.peg.1466	yes	fig|367737.4.peg.2073	yes
A and B	Carbohydrates	Central carbohydrate metabolism	Glycolysis and Gluconeogenesis	Pyruvate kinase (EC 2.7.1.40)	fig|28198.16.peg.1262,fig|28198.16.peg.1263,fig|28198.16.peg.1264	yes	fig|367737.4.peg.250	yes
A and B	Carbohydrates	Central carbohydrate metabolism	Pyruvate Alanine Serine Interconversions	Alanine racemase (EC 5.1.1.1)	fig|28198.16.peg.1318	yes	fig|367737.4.peg.774	yes
A and B	Carbohydrates	Central carbohydrate metabolism	Pyruvate Alanine Serine Interconversions	Branched-chain amino acid aminotransferase (EC 2.6.1.42)	fig|28198.16.peg.1401,fig|28198.16.peg.1820	yes	fig|367737.4.peg.118	yes
A and B	Carbohydrates	Central carbohydrate metabolism	Pyruvate metabolism I: anaplerotic reactions, PEP	Phosphoenolpyruvate carboxykinase [ATP] (EC 4.1.1.49)	fig|28198.16.peg.143,fig|28198.16.peg.144	yes	fig|367737.4.peg.1212	yes
A and B	Carbohydrates	Central carbohydrate metabolism	Pyruvate metabolism I: anaplerotic reactions, PEP	Pyruvate kinase (EC 2.7.1.40)	fig|28198.16.peg.1262,fig|28198.16.peg.1263,fig|28198.16.peg.1264	yes	fig|367737.4.peg.250	yes
A and B	Carbohydrates	Central carbohydrate metabolism	Pyruvate metabolism II: acetyl-CoA, acetogenesis from pyruvate	Acetate kinase (EC 2.7.2.1)	fig|28198.16.peg.1227,fig|28198.16.peg.1381	yes	fig|367737.4.peg.485,fig|367737.4.peg.487,fig|367737.4.peg.489	yes
A and B	Carbohydrates	Central carbohydrate metabolism	Pyruvate metabolism II: acetyl-CoA, acetogenesis from pyruvate	Acetate permease ActP (cation/acetate symporter)	fig|28198.16.peg.989,fig|28198.16.peg.1232,fig|28198.16.peg.1233,fig|28198.16.peg.1235,fig|28198.16.peg.1917	yes	fig|367737.4.peg.492,fig|367737.4.peg.494	yes
A and B	Carbohydrates	Central carbohydrate metabolism	Pyruvate metabolism II: acetyl-CoA, acetogenesis from pyruvate	Aldehyde dehydrogenase (EC 1.2.1.3)	fig|28198.16.peg.1055	yes	fig|367737.4.peg.371	yes
A and B	Carbohydrates	Central carbohydrate metabolism	Pyruvate metabolism II: acetyl-CoA, acetogenesis from pyruvate	Dihydrolipoamide acetyltransferase component of pyruvate dehydrogenase complex (EC 2.3.1.12)	fig|28198.16.peg.1665	yes	fig|367737.4.peg.1449	yes
A and B	Carbohydrates	Central carbohydrate metabolism	Pyruvate metabolism II: acetyl-CoA, acetogenesis from pyruvate	Putative membrane protein, clustering with ActP	fig|28198.16.peg.992,fig|28198.16.peg.1234	yes	fig|367737.4.peg.493,fig|367737.4.peg.495	yes
A and B	Carbohydrates	Central carbohydrate metabolism	Pyruvate metabolism II: acetyl-CoA, acetogenesis from pyruvate	Pyruvate dehydrogenase E1 component (EC 1.2.4.1)	fig|28198.16.peg.1664	yes	fig|367737.4.peg.1448	yes
A and B	Carbohydrates	Central carbohydrate metabolism	TCA Cycle	Aconitate hydratase 2 (EC 4.2.1.3)	fig|28198.16.peg.131	yes	fig|367737.4.peg.1417	yes
A and B	Carbohydrates	Central carbohydrate metabolism	TCA Cycle	Citrate synthase (si) (EC 2.3.3.1)	fig|28198.16.peg.393	yes	fig|367737.4.peg.303	yes
A and B	Carbohydrates	Central carbohydrate metabolism	TCA Cycle	Fumarate hydratase class I, aerobic (EC 4.2.1.2)	fig|28198.16.peg.818	yes	fig|367737.4.peg.1876	yes
A and B	Carbohydrates	Central carbohydrate metabolism	TCA Cycle	Isocitrate dehydrogenase [NADP] (EC 1.1.1.42)	fig|28198.16.peg.60,fig|28198.16.peg.1906	yes	fig|367737.4.peg.1294	yes
A and B	Carbohydrates	Central carbohydrate metabolism	TCA Cycle	Malate dehydrogenase (EC 1.1.1.37)	fig|28198.16.peg.61	yes	fig|367737.4.peg.1295	yes
A and B	Carbohydrates	Central carbohydrate metabolism	TCA Cycle	Malate:quinone oxidoreductase (EC 1.1.5.4)	fig|28198.16.peg.984	yes	fig|367737.4.peg.503	yes
A and B	Carbohydrates	Central carbohydrate metabolism	TCA Cycle	Succinate dehydrogenase flavoprotein subunit (EC 1.3.99.1)	fig|28198.16.peg.403,fig|28198.16.peg.404	yes	fig|367737.4.peg.293	yes
A and B	Carbohydrates	Central carbohydrate metabolism	TCA Cycle	Succinate dehydrogenase iron-sulfur protein (EC 1.3.99.1)	fig|28198.16.peg.405	yes	fig|367737.4.peg.292	yes
A	Carbohydrates	Central carbohydrate metabolism	Pyruvate metabolism I: anaplerotic reactions, PEP	Malate permease	fig|28198.16.peg.1421	yes		no
A	Carbohydrates	Central carbohydrate metabolism	Pyruvate metabolism II: acetyl-CoA, acetogenesis from pyruvate	Dihydrolipoamide dehydrogenase of pyruvate dehydrogenase complex (EC 1.8.1.4)	fig|28198.16.peg.1323	yes		no
B	Carbohydrates	Central carbohydrate metabolism	Glycolysis and Gluconeogenesis	Triosephosphate isomerase (EC 5.3.1.1)		no	fig|367737.4.peg.2074	yes
B	Carbohydrates	Central carbohydrate metabolism	Pentose phosphate pathway	Ribose 5-phosphate isomerase B (EC 5.3.1.6)		no	fig|367737.4.peg.622	yes
B	Carbohydrates	Central carbohydrate metabolism	Pyruvate metabolism I: anaplerotic reactions, PEP	NADP-dependent malic enzyme (EC 1.1.1.40)		no	fig|367737.4.peg.1064	yes
B	Carbohydrates	Central carbohydrate metabolism	Pyruvate metabolism I: anaplerotic reactions, PEP	Pyruvate carboxyl transferase subunit A (EC 6.4.1.1)		no	fig|367737.4.peg.592	yes
B	Carbohydrates	Central carbohydrate metabolism	Pyruvate metabolism I: anaplerotic reactions, PEP	Pyruvate carboxyl transferase subunit B (EC 6.4.1.1)		no	fig|367737.4.peg.168	yes
B	Carbohydrates	Central carbohydrate metabolism	Pyruvate metabolism II: acetyl-CoA, acetogenesis from pyruvate	Phosphate acetyltransferase (EC 2.3.1.8)		no	fig|367737.4.peg.486	yes
B	Carbohydrates	Central carbohydrate metabolism	TCA Cycle	Fumarate hydratase class II (EC 4.2.1.2)		no	fig|367737.4.peg.707	yes
A and B	Carbohydrates	Fermentation	Acetolactate synthase subunits	Acetolactate synthase large subunit (EC 2.2.1.6)	fig|28198.16.peg.13,fig|28198.16.peg.891	yes	fig|367737.4.peg.1144	yes
A and B	Carbohydrates	Fermentation	Acetolactate synthase subunits	Acetolactate synthase small subunit (EC 2.2.1.6)	fig|28198.16.peg.12	yes	fig|367737.4.peg.1145	yes
A and B	Carbohydrates	One-carbon Metabolism	One-carbon metabolism by tetrahydropterines	5,10-methylenetetrahydrofolate reductase (EC 1.5.1.20)	fig|28198.16.peg.1521	yes	fig|367737.4.peg.212	yes
A and B	Carbohydrates	One-carbon Metabolism	One-carbon metabolism by tetrahydropterines	5-formyltetrahydrofolate cyclo-ligase (EC 6.3.3.2)	fig|28198.16.peg.1416	yes	fig|367737.4.peg.875	yes
A and B	Carbohydrates	One-carbon Metabolism	One-carbon metabolism by tetrahydropterines	Formyltetrahydrofolate deformylase (EC 3.5.1.10)	fig|28198.16.peg.954	yes	fig|367737.4.peg.1065	yes
A and B	Carbohydrates	One-carbon Metabolism	One-carbon metabolism by tetrahydropterines	Methenyltetrahydrofolate cyclohydrolase (EC 3.5.4.9)	fig|28198.16.peg.587	yes	fig|367737.4.peg.624	yes
A and B	Carbohydrates	One-carbon Metabolism	One-carbon metabolism by tetrahydropterines	Methylenetetrahydrofolate dehydrogenase (NADP+) (EC 1.5.1.5)	fig|28198.16.peg.587	yes	fig|367737.4.peg.624	yes
A and B	Carbohydrates	Organic acids	Lactate utilization	L-lactate permease	fig|28198.16.peg.798,fig|28198.16.peg.1376	yes	fig|367737.4.peg.33	yes
A and B	Carbohydrates	Organic acids	Lactate utilization	Predicted D-lactate dehydrogenase, Fe-S protein, FAD/FMN-containing	fig|28198.16.peg.1375	yes	fig|367737.4.peg.32	yes
A and B	Carbohydrates	Organic acids	Lactate utilization	Predicted L-lactate dehydrogenase, Fe-S oxidoreductase subunit YkgE	fig|28198.16.peg.790,fig|28198.16.peg.1939	yes	fig|367737.4.peg.38	yes
A and B	Carbohydrates	Organic acids	Lactate utilization	Predicted L-lactate dehydrogenase, Iron-sulfur cluster-binding subunit YkgF	fig|28198.16.peg.791,fig|28198.16.peg.792,fig|28198.16.peg.793	yes	fig|367737.4.peg.37	yes
A and B	Carbohydrates	Organic acids	Lactate utilization	Predicted L-lactate dehydrogenase, hypothetical protein subunit YkgG	fig|28198.16.peg.794,fig|28198.16.peg.795	yes	fig|367737.4.peg.36	yes
A and B	Carbohydrates	Organic acids	Methylcitrate cycle	2-methylaconitate isomerase	fig|28198.16.peg.1712,fig|28198.16.peg.1713,fig|28198.16.peg.1885	yes	fig|367737.4.peg.272	yes
A and B	Carbohydrates	Organic acids	Methylcitrate cycle	2-methylcitrate synthase (EC 2.3.3.5)	fig|28198.16.peg.1577	yes	fig|367737.4.peg.270	yes
A and B	Carbohydrates	Organic acids	Methylcitrate cycle	2-methylisocitrate dehydratase (EC 4.2.1.99)	fig|28198.16.peg.131	yes	fig|367737.4.peg.1417	yes
A and B	Carbohydrates	Organic acids	Methylcitrate cycle	Methylisocitrate lyase (EC 4.1.3.30)	fig|28198.16.peg.1576	yes	fig|367737.4.peg.269	yes
B	Carbohydrates	Organic acids	Methylcitrate cycle	2-methylcitrate dehydratase FeS dependent (EC 4.2.1.79)		no	fig|367737.4.peg.271	yes
A and B	Cell Division and Cell Cycle	no subcategory	Macromolecular synthesis operon	Carbamoyl-phosphate synthase large chain (EC 6.3.5.5)	fig|28198.16.peg.510,fig|28198.16.peg.511,fig|28198.16.peg.1879	yes	fig|367737.4.peg.1350	yes
A and B	Cell Division and Cell Cycle	no subcategory	Macromolecular synthesis operon	Carbamoyl-phosphate synthase small chain (EC 6.3.5.5)	fig|28198.16.peg.306	yes	fig|367737.4.peg.130	yes
A and B	Cell Division and Cell Cycle	no subcategory	Macromolecular synthesis operon	DNA primase (EC 2.7.7.-)	fig|28198.16.peg.307,fig|28198.16.peg.308	yes	fig|367737.4.peg.1584	yes
A and B	Cell Division and Cell Cycle	no subcategory	Macromolecular synthesis operon	RNA polymerase sigma factor RpoD	fig|28198.16.peg.1295,fig|28198.16.peg.1296	yes	fig|367737.4.peg.997	yes
A and B	Cell Division and Cell Cycle	no subcategory	Macromolecular synthesis operon	Transamidase GatB domain protein	fig|28198.16.peg.191,fig|28198.16.peg.1858	yes	fig|367737.4.peg.892	yes
A and B	Cell Division and Cell Cycle	no subcategory	Macromolecular synthesis operon	TsaD/Kae1/Qri7 protein, required for threonylcarbamoyladenosine t(6)A37 formation in tRNA	fig|28198.16.peg.1550,fig|28198.16.peg.1551	yes	fig|367737.4.peg.163	yes
A and B	Cell Division and Cell Cycle	no subcategory	YgjD and YeaZ	TsaB protein, required for threonylcarbamoyladenosine (t(6)A) formation in tRNA	fig|28198.16.peg.259	yes	fig|367737.4.peg.1985	yes
A and B	Cell Division and Cell Cycle	no subcategory	YgjD and YeaZ	TsaD/Kae1/Qri7 protein, required for threonylcarbamoyladenosine t(6)A37 formation in tRNA	fig|28198.16.peg.1550,fig|28198.16.peg.1551	yes	fig|367737.4.peg.163	yes
B	Cell Division and Cell Cycle	no subcategory	Bacterial Cytoskeleton	Stage 0 sporulation protein J		no	fig|367737.4.peg.1574	yes
B	Cell Division and Cell Cycle	no subcategory	Macromolecular synthesis operon	SSU ribosomal protein S21p		no	fig|367737.4.peg.2208	yes
A and B	Cell Wall and Capsule	Capsular and extracellular polysacchrides	Sialic Acid Metabolism	Glucosamine--fructose-6-phosphate aminotransferase [isomerizing] (EC 2.6.1.16)	fig|28198.16.peg.1777	yes	fig|367737.4.peg.437	yes
A and B	Cell Wall and Capsule	Capsular and extracellular polysacchrides	Sialic Acid Metabolism	Glucosamine-1-phosphate N-acetyltransferase (EC 2.3.1.157)	fig|28198.16.peg.976,fig|28198.16.peg.977	yes	fig|367737.4.peg.2144	yes
A and B	Cell Wall and Capsule	Capsular and extracellular polysacchrides	Sialic Acid Metabolism	N-acetylglucosamine-1-phosphate uridyltransferase (EC 2.7.7.23)	fig|28198.16.peg.976,fig|28198.16.peg.977	yes	fig|367737.4.peg.2144	yes
A and B	Cell Wall and Capsule	Capsular and extracellular polysacchrides	Sialic Acid Metabolism	N-acetylneuraminate synthase (EC 2.5.1.56)	fig|28198.16.peg.1723	yes	fig|367737.4.peg.2187	yes
A and B	Cell Wall and Capsule	Capsular and extracellular polysacchrides	Sialic Acid Metabolism	Phosphoglucosamine mutase (EC 5.4.2.10)	fig|28198.16.peg.740,fig|28198.16.peg.741,fig|28198.16.peg.1454	yes	fig|367737.4.peg.1738,fig|367737.4.peg.81,fig|367737.4.peg.828	yes
A	Cell Wall and Capsule	Capsular and extracellular polysacchrides	Polysaccharide deacetylases	Peptidoglycan N-acetylglucosamine deacetylase (EC 3.5.1.-)	fig|28198.16.peg.1218	yes		no
A	Cell Wall and Capsule	Capsular and extracellular polysacchrides	Sialic Acid Metabolism	TRAP-type transport system, small permease component, predicted N-acetylneuraminate transporter	fig|28198.16.peg.522	yes		no
B	Cell Wall and Capsule	Capsular and extracellular polysacchrides	CMP-N-acetylneuraminate Biosynthesis	N-Acetylneuraminate cytidylyltransferase (EC 2.7.7.43)		no	fig|367737.4.peg.2186	yes
B	Cell Wall and Capsule	Capsular and extracellular polysacchrides	CMP-N-acetylneuraminate Biosynthesis	UDP-N-acetylglucosamine 2-epimerase (EC 5.1.3.14)		no	fig|367737.4.peg.678	yes
B	Cell Wall and Capsule	Capsular and extracellular polysacchrides	Capsular heptose biosynthesis	D-glycero-D-manno-heptose 1,7-bisphosphate phosphatase (EC 3.1.1.-)		no	fig|367737.4.peg.1763	yes
A and B	Cell Wall and Capsule	Gram-Negative cell wall components	Lipoprotein sorting system	Lipoprotein releasing system transmembrane protein LolC	fig|28198.16.peg.86	yes	fig|367737.4.peg.1291	yes
A and B	Cell Wall and Capsule	Gram-Negative cell wall components	Lipoprotein sorting system	Outer membrane lipoprotein carrier protein LolA	fig|28198.16.peg.83	yes	fig|367737.4.peg.1289	yes
A	Cell Wall and Capsule	Gram-Negative cell wall components	Peptidoglycan lipid II flippase	Proposed peptidoglycan lipid II flippase MurJ	fig|28198.16.peg.1265	yes		no
B	Cell Wall and Capsule	Gram-Negative cell wall components	KDO2-Lipid A biosynthesis	O-antigen flippase Wzx		no	fig|367737.4.peg.668	yes
B	Cell Wall and Capsule	Gram-Negative cell wall components	LOS core oligosaccharide biosynthesis	ADP-heptose synthase (EC 2.7.-.-)		no	fig|367737.4.peg.1765	yes
B	Cell Wall and Capsule	Gram-Negative cell wall components	LOS core oligosaccharide biosynthesis	D-glycero-beta-D-manno-heptose 7-phosphate kinase		no	fig|367737.4.peg.1765	yes
A	Cell Wall and Capsule	Gram-Positive cell wall components	D-Alanyl Lipoteichoic Acid Biosynthesis	D-alanine--poly(phosphoribitol) ligase subunit 1 (EC 6.1.1.13)	fig|28198.16.peg.342	yes		no
A and B	Cell Wall and Capsule	no subcategory	Peptidoglycan Biosynthesis	Cell division protein FtsI [Peptidoglycan synthetase] (EC 2.4.1.129)	fig|28198.16.peg.1370,fig|28198.16.peg.1565	yes	fig|367737.4.peg.1866,fig|367737.4.peg.982	yes
A and B	Cell Wall and Capsule	no subcategory	Peptidoglycan Biosynthesis	D-alanine--D-alanine ligase (EC 6.3.2.4)	fig|28198.16.peg.1152	yes	fig|367737.4.peg.733	yes
A and B	Cell Wall and Capsule	no subcategory	Peptidoglycan Biosynthesis	Glucosamine-1-phosphate N-acetyltransferase (EC 2.3.1.157)	fig|28198.16.peg.976,fig|28198.16.peg.977	yes	fig|367737.4.peg.2144	yes
A and B	Cell Wall and Capsule	no subcategory	Peptidoglycan Biosynthesis	Glutamate racemase (EC 5.1.1.3)	fig|28198.16.peg.1135	yes	fig|367737.4.peg.279	yes
A and B	Cell Wall and Capsule	no subcategory	Peptidoglycan Biosynthesis	Glutamine synthetase type I (EC 6.3.1.2)	fig|28198.16.peg.1160,fig|28198.16.peg.1161,fig|28198.16.peg.1937	yes	fig|367737.4.peg.1858	yes
A and B	Cell Wall and Capsule	no subcategory	Peptidoglycan Biosynthesis	Multimodular transpeptidase-transglycosylase (EC 2.4.1.129) (EC 3.4.-.-)	fig|28198.16.peg.809	yes	fig|367737.4.peg.1857	yes
A and B	Cell Wall and Capsule	no subcategory	Peptidoglycan Biosynthesis	N-acetylglucosamine-1-phosphate uridyltransferase (EC 2.7.7.23)	fig|28198.16.peg.976,fig|28198.16.peg.977	yes	fig|367737.4.peg.2144	yes
A and B	Cell Wall and Capsule	no subcategory	Peptidoglycan Biosynthesis	Phospho-N-acetylmuramoyl-pentapeptide-transferase (EC 2.7.8.13)	fig|28198.16.peg.1627,fig|28198.16.peg.1628	yes	fig|367737.4.peg.1854	yes
A and B	Cell Wall and Capsule	no subcategory	Peptidoglycan Biosynthesis	UDP-N-acetylenolpyruvoylglucosamine reductase (EC 1.1.1.158)	fig|28198.16.peg.1529	yes	fig|367737.4.peg.2175	yes
A and B	Cell Wall and Capsule	no subcategory	Peptidoglycan Biosynthesis	UDP-N-acetylglucosamine 1-carboxyvinyltransferase (EC 2.5.1.7)	fig|28198.16.peg.223	yes	fig|367737.4.peg.1811	yes
A and B	Cell Wall and Capsule	no subcategory	Peptidoglycan Biosynthesis	UDP-N-acetylglucosamine--N-acetylmuramyl-(pentapeptide) pyrophosphoryl-undecaprenol N-acetylglucosamine transferase (EC 2.4.1.227)	fig|28198.16.peg.1781	yes	fig|367737.4.peg.1864	yes
A and B	Cell Wall and Capsule	no subcategory	Peptidoglycan Biosynthesis	UDP-N-acetylmuramate--alanine ligase (EC 6.3.2.8)	fig|28198.16.peg.1332	yes	fig|367737.4.peg.226	yes
A and B	Cell Wall and Capsule	no subcategory	Peptidoglycan Biosynthesis	UDP-N-acetylmuramoylalanine--D-glutamate ligase (EC 6.3.2.9)	fig|28198.16.peg.1626	yes	fig|367737.4.peg.1853	yes
A and B	Cell Wall and Capsule	no subcategory	Peptidoglycan Biosynthesis	UDP-N-acetylmuramoylalanyl-D-glutamate--2,6-diaminopimelate ligase (EC 6.3.2.13)	fig|28198.16.peg.1196	yes	fig|367737.4.peg.508	yes
A and B	Cell Wall and Capsule	no subcategory	Peptidoglycan Biosynthesis	UDP-N-acetylmuramoylalanyl-D-glutamyl-2,6-diaminopimelate--D-alanyl-D-alanine ligase (EC 6.3.2.10)	fig|28198.16.peg.1154	yes	fig|367737.4.peg.735	yes
A and B	Cell Wall and Capsule	no subcategory	Peptidoglycan biosynthesis--gjo	D-alanine--D-alanine ligase (EC 6.3.2.4)	fig|28198.16.peg.1152	yes	fig|367737.4.peg.733	yes
A and B	Cell Wall and Capsule	no subcategory	Peptidoglycan biosynthesis--gjo	UDP-N-acetylmuramate--alanine ligase (EC 6.3.2.8)	fig|28198.16.peg.1332	yes	fig|367737.4.peg.226	yes
A and B	Cell Wall and Capsule	no subcategory	Peptidoglycan biosynthesis--gjo	UDP-N-acetylmuramoylalanine--D-glutamate ligase (EC 6.3.2.9)	fig|28198.16.peg.1626	yes	fig|367737.4.peg.1853	yes
A and B	Cell Wall and Capsule	no subcategory	Peptidoglycan biosynthesis--gjo	UDP-N-acetylmuramoylalanyl-D-glutamate--2,6-diaminopimelate ligase (EC 6.3.2.13)	fig|28198.16.peg.1196	yes	fig|367737.4.peg.508	yes
A and B	Cell Wall and Capsule	no subcategory	Peptidoglycan biosynthesis--gjo	UDP-N-acetylmuramoylalanyl-D-glutamyl-2,6-diaminopimelate--D-alanyl-D-alanine ligase (EC 6.3.2.10)	fig|28198.16.peg.1154	yes	fig|367737.4.peg.735	yes
A and B	Cell Wall and Capsule	no subcategory	Recycling of Peptidoglycan Amino Acids	Aminoacyl-histidine dipeptidase (Peptidase D) (EC 3.4.13.3)	fig|28198.16.peg.81	yes	fig|367737.4.peg.1286	yes
A and B	Cell Wall and Capsule	no subcategory	UDP-N-acetylmuramate from Fructose-6-phosphate Biosynthesis	Glucosamine--fructose-6-phosphate aminotransferase [isomerizing] (EC 2.6.1.16)	fig|28198.16.peg.1777	yes	fig|367737.4.peg.437	yes
A and B	Cell Wall and Capsule	no subcategory	UDP-N-acetylmuramate from Fructose-6-phosphate Biosynthesis	Glucosamine-1-phosphate N-acetyltransferase (EC 2.3.1.157)	fig|28198.16.peg.976,fig|28198.16.peg.977	yes	fig|367737.4.peg.2144	yes
A and B	Cell Wall and Capsule	no subcategory	UDP-N-acetylmuramate from Fructose-6-phosphate Biosynthesis	N-acetylglucosamine-1-phosphate uridyltransferase (EC 2.7.7.23)	fig|28198.16.peg.976,fig|28198.16.peg.977	yes	fig|367737.4.peg.2144	yes
A and B	Cell Wall and Capsule	no subcategory	UDP-N-acetylmuramate from Fructose-6-phosphate Biosynthesis	Phosphoglucosamine mutase (EC 5.4.2.10)	fig|28198.16.peg.740,fig|28198.16.peg.741,fig|28198.16.peg.1454	yes	fig|367737.4.peg.1738,fig|367737.4.peg.81,fig|367737.4.peg.828	yes
A and B	Cell Wall and Capsule	no subcategory	UDP-N-acetylmuramate from Fructose-6-phosphate Biosynthesis	UDP-N-acetylenolpyruvoylglucosamine reductase (EC 1.1.1.158)	fig|28198.16.peg.1529	yes	fig|367737.4.peg.2175	yes
A and B	Cell Wall and Capsule	no subcategory	UDP-N-acetylmuramate from Fructose-6-phosphate Biosynthesis	UDP-N-acetylglucosamine 1-carboxyvinyltransferase (EC 2.5.1.7)	fig|28198.16.peg.223	yes	fig|367737.4.peg.1811	yes
A and B	Cell Wall and Capsule	no subcategory	YjeE	NAD(P)HX dehydratase	fig|28198.16.peg.1553,fig|28198.16.peg.1554	yes	fig|367737.4.peg.165	yes
A and B	Cell Wall and Capsule	no subcategory	YjeE	NAD(P)HX epimerase	fig|28198.16.peg.1553,fig|28198.16.peg.1554	yes	fig|367737.4.peg.165	yes
A and B	Cell Wall and Capsule	no subcategory	YjeE	TsaB protein, required for threonylcarbamoyladenosine (t(6)A) formation in tRNA	fig|28198.16.peg.259	yes	fig|367737.4.peg.1985	yes
A and B	Cell Wall and Capsule	no subcategory	YjeE	TsaE protein, required for threonylcarbamoyladenosine t(6)A37 formation in tRNA	fig|28198.16.peg.105	yes	fig|367737.4.peg.1256	yes
A	Cell Wall and Capsule	no subcategory	Murein Hydrolases	N-acetylmuramoyl-L-alanine amidase (EC 3.5.1.28)	fig|28198.16.peg.592	yes		no
A	Cell Wall and Capsule	no subcategory	Murein Hydrolases	Soluble lytic murein transglycosylase precursor (EC 3.2.1.-)	fig|28198.16.peg.153	yes		no
A	Cell Wall and Capsule	no subcategory	Peptidoglycan Biosynthesis	Rod shape-determining protein RodA	fig|28198.16.peg.389	yes		no
B	Cell Wall and Capsule	no subcategory	Recycling of Peptidoglycan Amino Acids	AmpG permease		no	fig|367737.4.peg.330	yes
B	Cell Wall and Capsule	no subcategory	UDP-2,3-diacetamido-2,3-dideoxy-D-mannuronic Acid	UDP-2,3-diacetamido-2,3-dideoxy-D-glucuronic acid 2-epimerase		no	fig|367737.4.peg.678	yes
B	Cell Wall and Capsule	no subcategory	UDP-2,3-diacetamido-2,3-dideoxy-D-mannuronic Acid	UDP-2,3-diacetamido-2,3-dideoxy-D-mannuronic acid transferase		no	fig|367737.4.peg.677	yes
B	Cell Wall and Capsule	no subcategory	UDP-2,3-diacetamido-2,3-dideoxy-D-mannuronic Acid	UDP-2-acetamido-2-deoxy-D-glucose dehydrogenase (NAD+)		no	fig|367737.4.peg.648	yes
B	Cell Wall and Capsule	no subcategory	UDP-2,3-diacetamido-2,3-dideoxy-D-mannuronic Acid	UDP-2-acetamido-2-deoxy-D-glucuronic acid dehydrogenase (NAD+ cofactor)		no	fig|367737.4.peg.649	yes
B	Cell Wall and Capsule	no subcategory	UDP-2,3-diacetamido-2,3-dideoxy-D-mannuronic Acid	UDP-2-acetamido-3-amino-2,3-dideoxy-D-glucuronic acid acetyltransferase		no	fig|367737.4.peg.650	yes
A and B	Clustering-based subsystems	Cell Division	Cell Division Subsystem including YidCD	Chromosomal replication initiator protein DnaA	fig|28198.16.peg.565	yes	fig|367737.4.peg.1	yes
A and B	Clustering-based subsystems	Cell Division	Cell Division Subsystem including YidCD	Chromosome (plasmid) partitioning protein ParA	fig|28198.16.peg.317,fig|28198.16.peg.1759	yes	fig|367737.4.peg.1575	yes
A and B	Clustering-based subsystems	Cell Division	Cell Division Subsystem including YidCD	Chromosome (plasmid) partitioning protein ParB	fig|28198.16.peg.318	yes	fig|367737.4.peg.1574	yes
A and B	Clustering-based subsystems	Cell Division	Cell Division Subsystem including YidCD	DNA gyrase subunit A (EC 5.99.1.3)	fig|28198.16.peg.1203,fig|28198.16.peg.1704,fig|28198.16.peg.1968	yes	fig|367737.4.peg.1757	yes
A and B	Clustering-based subsystems	Cell Division	Cell Division Subsystem including YidCD	DNA gyrase subunit B (EC 5.99.1.3)	fig|28198.16.peg.563,fig|28198.16.peg.1891	yes	fig|367737.4.peg.3	yes
A and B	Clustering-based subsystems	Cell Division	Cell Division Subsystem including YidCD	DNA polymerase III beta subunit (EC 2.7.7.7)	fig|28198.16.peg.564	yes	fig|367737.4.peg.2	yes
A and B	Clustering-based subsystems	Cell Division	Cell Division Subsystem including YidCD	GTPase and tRNA-U34 5-formylation enzyme TrmE	fig|28198.16.peg.831,fig|28198.16.peg.832	yes	fig|367737.4.peg.1593	yes
A and B	Clustering-based subsystems	Cell Division	Cell Division Subsystem including YidCD	Inner membrane protein translocase component YidC, long form	fig|28198.16.peg.834,fig|28198.16.peg.835	yes	fig|367737.4.peg.1595	yes
A and B	Clustering-based subsystems	Cell Division	Cell Division Subsystem including YidCD	LSU ribosomal protein L34p	fig|28198.16.peg.837	yes	fig|367737.4.peg.1598	yes
A and B	Clustering-based subsystems	Cell Division	Cell Division Subsystem including YidCD	RNA-binding protein Jag	fig|28198.16.peg.833	yes	fig|367737.4.peg.1594	yes
A and B	Clustering-based subsystems	Cell Division	Cell Division Subsystem including YidCD	Ribonuclease P protein component (EC 3.1.26.5)	fig|28198.16.peg.836	yes	fig|367737.4.peg.1597	yes
A and B	Clustering-based subsystems	Cell Division	Cell Division Subsystem including YidCD	rRNA small subunit 7-methylguanosine (m7G) methyltransferase GidB	fig|28198.16.peg.1301	yes	fig|367737.4.peg.1218	yes
A and B	Clustering-based subsystems	Cell Division	Cell Division Subsystem including YidCD	tRNA uridine 5-carboxymethylaminomethyl modification enzyme GidA	fig|28198.16.peg.1037,fig|28198.16.peg.1038	yes	fig|367737.4.peg.2151	yes
B	Clustering-based subsystems	Cell Division	Cell Division Subsystem including YidCD	Protein YidD		no	fig|367737.4.peg.1596	yes
A and B	Clustering-based subsystems	Chemotaxis, response regulators	CBSS-323850.3.peg.3142	Chemotaxis protein CheC -- inhibitor of MCP methylation	fig|28198.16.peg.163,fig|28198.16.peg.164	yes	fig|367737.4.peg.1337,fig|367737.4.peg.1338	yes
A and B	Clustering-based subsystems	Chemotaxis, response regulators	CBSS-323850.3.peg.3142	diguanylate cyclase (GGDEF domain) with PAS/PAC sensor	fig|28198.16.peg.1025	yes	fig|367737.4.peg.1419	yes
A and B	Clustering-based subsystems	Cofactors	Riboflavin synthesis cluster	3,4-dihydroxy-2-butanone 4-phosphate synthase (EC 4.1.99.12)	fig|28198.16.peg.142	yes	fig|367737.4.peg.1119,fig|367737.4.peg.1213	yes
A and B	Clustering-based subsystems	Cofactors	Riboflavin synthesis cluster	5-amino-6-(5-phosphoribosylamino)uracil reductase (EC 1.1.1.193)	fig|28198.16.peg.267	yes	fig|367737.4.peg.1991	yes
A and B	Clustering-based subsystems	Cofactors	Riboflavin synthesis cluster	6,7-dimethyl-8-ribityllumazine synthase (EC 2.5.1.78)	fig|28198.16.peg.1159	yes	fig|367737.4.peg.1814	yes
A and B	Clustering-based subsystems	Cofactors	Riboflavin synthesis cluster	ATP phosphoribosyltransferase (EC 2.4.2.17)	fig|28198.16.peg.1740	yes	fig|367737.4.peg.315	yes
A and B	Clustering-based subsystems	Cofactors	Riboflavin synthesis cluster	C-terminal domain of CinA type S	fig|28198.16.peg.985	yes	fig|367737.4.peg.502	yes
A and B	Clustering-based subsystems	Cofactors	Riboflavin synthesis cluster	Diacylglycerol kinase (EC 2.7.1.107)	fig|28198.16.peg.1572	yes	fig|367737.4.peg.1788	yes
A and B	Clustering-based subsystems	Cofactors	Riboflavin synthesis cluster	Diaminohydroxyphosphoribosylaminopyrimidine deaminase (EC 3.5.4.26)	fig|28198.16.peg.267	yes	fig|367737.4.peg.1991	yes
A and B	Clustering-based subsystems	Cofactors	Riboflavin synthesis cluster	GTP cyclohydrolase II (EC 3.5.4.25)	fig|28198.16.peg.142,fig|28198.16.peg.1302	yes	fig|367737.4.peg.1213,fig|367737.4.peg.1219	yes
A and B	Clustering-based subsystems	Cofactors	Riboflavin synthesis cluster	Orotidine 5'-phosphate decarboxylase (EC 4.1.1.23)	fig|28198.16.peg.1157	yes	fig|367737.4.peg.1816	yes
A and B	Clustering-based subsystems	Cofactors	Riboflavin synthesis cluster	Phosphatidylglycerophosphatase A (EC 3.1.3.27)	fig|28198.16.peg.736	yes	fig|367737.4.peg.128	yes
A and B	Clustering-based subsystems	Cofactors	Riboflavin synthesis cluster	Phosphoribosyl-ATP pyrophosphatase (EC 3.6.1.31)	fig|28198.16.peg.1398	yes	fig|367737.4.peg.121	yes
A and B	Clustering-based subsystems	Cofactors	Riboflavin synthesis cluster	Riboflavin synthase eubacterial/eukaryotic (EC 2.5.1.9)	fig|28198.16.peg.1039	yes	fig|367737.4.peg.2152	yes
A and B	Clustering-based subsystems	Cofactors	Riboflavin synthesis cluster	Ribulose-phosphate 3-epimerase (EC 5.1.3.1)	fig|28198.16.peg.779,fig|28198.16.peg.780	yes	fig|367737.4.peg.844	yes
A and B	Clustering-based subsystems	Cofactors	Riboflavin synthesis cluster	Thiamine-monophosphate kinase (EC 2.7.4.16)	fig|28198.16.peg.1638	yes	fig|367737.4.peg.728	yes
A and B	Clustering-based subsystems	Cofactors	Riboflavin synthesis cluster	Transcription termination protein NusB	fig|28198.16.peg.1158	yes	fig|367737.4.peg.1815	yes
B	Clustering-based subsystems	Cofactors	Riboflavin synthesis cluster	Inner membrane protein YihY, formerly thought to be RNase BN		no	fig|367737.4.peg.1809	yes
B	Clustering-based subsystems	Cofactors	Riboflavin synthesis cluster	NADH dehydrogenase (EC 1.6.99.3)		no	fig|367737.4.peg.2161	yes
A	Clustering-based subsystems	DNA polymerase III epsilon cluster	CBSS-342610.3.peg.1536	DNA polymerase III epsilon subunit (EC 2.7.7.7)	fig|28198.16.peg.1230	yes		no
A	Clustering-based subsystems	DNA polymerase III epsilon cluster	CBSS-342610.3.peg.1536	Predicted signal-transduction protein containing cAMP-binding and CBS domains	fig|28198.16.peg.990,fig|28198.16.peg.1231	yes		no
A and B	Clustering-based subsystems	Isoprenoid/cell wall biosynthesis: PREDICTED UNDECAPRENYL DIPHOSPHATE PHOSPHATASE	CBSS-83331.1.peg.3039	1-deoxy-D-xylulose 5-phosphate reductoisomerase (EC 1.1.1.267)	fig|28198.16.peg.751	yes	fig|367737.4.peg.160	yes
A and B	Clustering-based subsystems	Isoprenoid/cell wall biosynthesis: PREDICTED UNDECAPRENYL DIPHOSPHATE PHOSPHATASE	CBSS-83331.1.peg.3039	1-hydroxy-2-methyl-2-(E)-butenyl 4-diphosphate synthase (EC 1.17.7.1)	fig|28198.16.peg.967,fig|28198.16.peg.968	yes	fig|367737.4.peg.643	yes
A and B	Clustering-based subsystems	Isoprenoid/cell wall biosynthesis: PREDICTED UNDECAPRENYL DIPHOSPHATE PHOSPHATASE	CBSS-83331.1.peg.3039	Cell division protein FtsI [Peptidoglycan synthetase] (EC 2.4.1.129)	fig|28198.16.peg.1370,fig|28198.16.peg.1565	yes	fig|367737.4.peg.1866,fig|367737.4.peg.982	yes
A and B	Clustering-based subsystems	Isoprenoid/cell wall biosynthesis: PREDICTED UNDECAPRENYL DIPHOSPHATE PHOSPHATASE	CBSS-83331.1.peg.3039	Undecaprenyl diphosphate synthase (EC 2.5.1.31)	fig|28198.16.peg.979	yes	fig|367737.4.peg.2142	yes
B	Clustering-based subsystems	Isoprenoid/cell wall biosynthesis: PREDICTED UNDECAPRENYL DIPHOSPHATE PHOSPHATASE	CBSS-83331.1.peg.3039	Intramembrane protease RasP/YluC, implicated in cell division based on FtsL cleavage		no	fig|367737.4.peg.855	yes
A	Clustering-based subsystems	Lysine, threonine, methionine, and cysteine	CBSS-84588.1.peg.1247	D-alanyl-D-alanine carboxypeptidase (EC 3.4.16.4)	fig|28198.16.peg.1023,fig|28198.16.peg.1216	yes		no
A	Clustering-based subsystems	Phosphate metabolism	PhoR-PhoB two-component regulatory system	Phosphate regulon transcriptional regulatory protein PhoB (SphR)	fig|28198.16.peg.987,fig|28198.16.peg.1030,fig|28198.16.peg.1489	yes		no
A and B	Clustering-based subsystems	Probably Pyrimidine biosynthesis-related	CBSS-306254.1.peg.1508	Carbamoyl-phosphate synthase small chain (EC 6.3.5.5)	fig|28198.16.peg.306	yes	fig|367737.4.peg.130	yes
A and B	Clustering-based subsystems	Probably Pyrimidine biosynthesis-related	CBSS-306254.1.peg.1508	Hypothetical protein probably associated with Carbamoyl-phosphate synthase	fig|28198.16.peg.305,fig|28198.16.peg.1865	yes	fig|367737.4.peg.131	yes
A and B	Clustering-based subsystems	Probably organic hydroperoxide resistance related hypothetical protein	CBSS-269482.1.peg.1294	Homoserine kinase (EC 2.7.1.39)	fig|28198.16.peg.260	yes	fig|367737.4.peg.1986	yes
B	Clustering-based subsystems	Probably organic hydroperoxide resistance related hypothetical protein	CBSS-269482.1.peg.1294	Organic hydroperoxide resistance transcriptional regulator		no	fig|367737.4.peg.584	yes
A and B	Clustering-based subsystems	Putative GGDEF domain protein related to agglutinin secretion	CBSS-323850.3.peg.3284	ABC transporter, transmembrane region:ABC transporter:Peptidase C39, bacteriocin processing	fig|28198.16.peg.1131	yes	fig|367737.4.peg.1108	yes
A and B	Clustering-based subsystems	Putative GGDEF domain protein related to agglutinin secretion	CBSS-323850.3.peg.3284	FIGfam010717	fig|28198.16.peg.983	yes	fig|367737.4.peg.2138	yes
A and B	Clustering-based subsystems	Putative GGDEF domain protein related to agglutinin secretion	CBSS-323850.3.peg.3284	GGDEF and EAL domain proteins	fig|28198.16.peg.93	yes	fig|367737.4.peg.1112	yes
A and B	Clustering-based subsystems	no subcategory	A protein believed to be a subunit or accessory protein of the formate dehydrogenase	Formate dehydrogenase subunit or accessory protein	fig|28198.16.peg.713	yes	fig|367737.4.peg.1488	yes
A and B	Clustering-based subsystems	no subcategory	A protein believed to be a subunit or accessory protein of the formate dehydrogenase	Formate dehydrogenase-O, major subunit (EC 1.2.1.2)	fig|28198.16.peg.708,fig|28198.16.peg.709,fig|28198.16.peg.710,fig|28198.16.peg.711,fig|28198.16.peg.712	yes	fig|367737.4.peg.1474,fig|367737.4.peg.1487	yes
A and B	Clustering-based subsystems	no subcategory	Bacterial RNA-metabolizing Zn-dependent hydrolases	Cell division protein FtsK	fig|28198.16.peg.9,fig|28198.16.peg.10	yes	fig|367737.4.peg.1147	yes
A and B	Clustering-based subsystems	no subcategory	Bacterial RNA-metabolizing Zn-dependent hydrolases	Ferric uptake regulation protein FUR	fig|28198.16.peg.1004	yes	fig|367737.4.peg.1744,fig|367737.4.peg.705	yes
A and B	Clustering-based subsystems	no subcategory	Bacterial RNA-metabolizing Zn-dependent hydrolases	Peptide deformylase (EC 3.5.1.88)	fig|28198.16.peg.1412	yes	fig|367737.4.peg.1674	yes
A and B	Clustering-based subsystems	no subcategory	Bacterial RNA-metabolizing Zn-dependent hydrolases	Polyribonucleotide nucleotidyltransferase (EC 2.7.7.8)	fig|28198.16.peg.1502,fig|28198.16.peg.1503,fig|28198.16.peg.1754	yes	fig|367737.4.peg.1169	yes
A and B	Clustering-based subsystems	no subcategory	Bacterial RNA-metabolizing Zn-dependent hydrolases	TsaB protein, required for threonylcarbamoyladenosine (t(6)A) formation in tRNA	fig|28198.16.peg.259	yes	fig|367737.4.peg.1985	yes
A and B	Clustering-based subsystems	no subcategory	Bacterial RNA-metabolizing Zn-dependent hydrolases	TsaD/Kae1/Qri7 protein, required for threonylcarbamoyladenosine t(6)A37 formation in tRNA	fig|28198.16.peg.1550,fig|28198.16.peg.1551	yes	fig|367737.4.peg.163	yes
A and B	Clustering-based subsystems	no subcategory	Bacterial RNA-metabolizing Zn-dependent hydrolases	Zn-dependent hydrolase, RNA-metabolising	fig|28198.16.peg.638,fig|28198.16.peg.639,fig|28198.16.peg.640	yes	fig|367737.4.peg.52	yes
A and B	Clustering-based subsystems	no subcategory	CBSS-138119.3.peg.2719	FIG146085: 3'-to-5' oligoribonuclease A, Bacillus type	fig|28198.16.peg.256	yes	fig|367737.4.peg.1982	yes
A and B	Clustering-based subsystems	no subcategory	CBSS-138119.3.peg.2719	Ribosome-binding factor A	fig|28198.16.peg.265	yes	fig|367737.4.peg.1989	yes
A and B	Clustering-based subsystems	no subcategory	CBSS-138119.3.peg.2719	Translation initiation factor 2	fig|28198.16.peg.262,fig|28198.16.peg.263,fig|28198.16.peg.264	yes	fig|367737.4.peg.1988	yes
A and B	Clustering-based subsystems	no subcategory	CBSS-138119.3.peg.2719	tRNA pseudouridine synthase B (EC 4.2.1.70)	fig|28198.16.peg.846	yes	fig|367737.4.peg.2028	yes
A and B	Clustering-based subsystems	no subcategory	CBSS-176279.3.peg.868	GTP-binding protein Obg	fig|28198.16.peg.311,fig|28198.16.peg.312,fig|28198.16.peg.1867	yes	fig|367737.4.peg.1581	yes
A and B	Clustering-based subsystems	no subcategory	CBSS-176279.3.peg.868	LSU ribosomal protein L21p	fig|28198.16.peg.309	yes	fig|367737.4.peg.1583	yes
A and B	Clustering-based subsystems	no subcategory	CBSS-176279.3.peg.868	LSU ribosomal protein L27p	fig|28198.16.peg.310	yes	fig|367737.4.peg.1582	yes
A and B	Clustering-based subsystems	no subcategory	CBSS-312309.3.peg.1965	Methionine aminopeptidase (EC 3.4.11.18)	fig|28198.16.peg.690	yes	fig|367737.4.peg.760	yes
A and B	Clustering-based subsystems	no subcategory	CBSS-312309.3.peg.1965	SSU ribosomal protein S2p (SAe)	fig|28198.16.peg.1197	yes	fig|367737.4.peg.527	yes
A and B	Clustering-based subsystems	no subcategory	CBSS-312309.3.peg.1965	Translation elongation factor Ts	fig|28198.16.peg.1198,fig|28198.16.peg.1976	yes	fig|367737.4.peg.528	yes
A and B	Clustering-based subsystems	no subcategory	CBSS-56780.10.peg.1536	Metal-dependent hydrolase YbeY, involved in rRNA and/or ribosome maturation and assembly	fig|28198.16.peg.1543	yes	fig|367737.4.peg.865	yes
A and B	Clustering-based subsystems	no subcategory	CTP synthase (EC 6.3.4.2) cluster	CTP synthase (EC 6.3.4.2)	fig|28198.16.peg.285	yes	fig|367737.4.peg.2198	yes
A and B	Clustering-based subsystems	no subcategory	CTP synthase (EC 6.3.4.2) cluster	Inner membrane protein translocase component YidC, long form	fig|28198.16.peg.834,fig|28198.16.peg.835	yes	fig|367737.4.peg.1595	yes
A and B	Clustering-based subsystems	no subcategory	Cell division-ribosomal stress proteins cluster	Cell division protein FtsH (EC 3.4.24.-)	fig|28198.16.peg.89,fig|28198.16.peg.963,fig|28198.16.peg.1340,fig|28198.16.peg.1341,fig|28198.16.peg.1342	yes	fig|367737.4.peg.445	yes
A and B	Clustering-based subsystems	no subcategory	Cell division-ribosomal stress proteins cluster	Peptidyl-tRNA hydrolase (EC 3.1.1.29)	fig|28198.16.peg.589	yes	fig|367737.4.peg.626	yes
A and B	Clustering-based subsystems	no subcategory	Cell division-ribosomal stress proteins cluster	Ribosome-associated heat shock protein implicated in the recycling of the 50S subunit (S4 paralog)	fig|28198.16.peg.103	yes	fig|367737.4.peg.1259	yes
A and B	Clustering-based subsystems	no subcategory	Cell division-ribosomal stress proteins cluster	SSU ribosomal protein S1p	fig|28198.16.peg.276	yes	fig|367737.4.peg.1994	yes
A and B	Clustering-based subsystems	no subcategory	Cell division-ribosomal stress proteins cluster	Transcription accessory protein (S1 RNA-binding domain)	fig|28198.16.peg.1482	yes	fig|367737.4.peg.1962	yes
A and B	Clustering-based subsystems	no subcategory	Cell division-ribosomal stress proteins cluster	Transcription-repair coupling factor	fig|28198.16.peg.907	yes	fig|367737.4.peg.402	yes
A and B	Clustering-based subsystems	no subcategory	Cell division-ribosomal stress proteins cluster	tRNA(Ile)-lysidine synthetase (EC 6.3.4.19)	fig|28198.16.peg.1389	yes	fig|367737.4.peg.205	yes
A and B	Clustering-based subsystems	no subcategory	ClpAS cluster	ATP-dependent Clp protease ATP-binding subunit ClpA	fig|28198.16.peg.1590	yes	fig|367737.4.peg.1869	yes
A and B	Clustering-based subsystems	no subcategory	ClpAS cluster	ATP-dependent Clp protease adaptor protein ClpS	fig|28198.16.peg.1589,fig|28198.16.peg.1949	yes	fig|367737.4.peg.1870	yes
A and B	Clustering-based subsystems	no subcategory	DNA gyrase subunits	DNA gyrase subunit A (EC 5.99.1.3)	fig|28198.16.peg.1203,fig|28198.16.peg.1704,fig|28198.16.peg.1968	yes	fig|367737.4.peg.1757	yes
A and B	Clustering-based subsystems	no subcategory	DNA gyrase subunits	DNA gyrase subunit B (EC 5.99.1.3)	fig|28198.16.peg.563,fig|28198.16.peg.1891	yes	fig|367737.4.peg.3	yes
A and B	Clustering-based subsystems	no subcategory	DNA replication cluster 1	Chromosomal replication initiator protein DnaA	fig|28198.16.peg.565	yes	fig|367737.4.peg.1	yes
A and B	Clustering-based subsystems	no subcategory	DNA replication cluster 1	DNA gyrase subunit A (EC 5.99.1.3)	fig|28198.16.peg.1203,fig|28198.16.peg.1704,fig|28198.16.peg.1968	yes	fig|367737.4.peg.1757	yes
A and B	Clustering-based subsystems	no subcategory	DNA replication cluster 1	DNA gyrase subunit B (EC 5.99.1.3)	fig|28198.16.peg.563,fig|28198.16.peg.1891	yes	fig|367737.4.peg.3	yes
A and B	Clustering-based subsystems	no subcategory	DNA replication cluster 1	DNA polymerase III beta subunit (EC 2.7.7.7)	fig|28198.16.peg.564	yes	fig|367737.4.peg.2	yes
A and B	Clustering-based subsystems	no subcategory	DNA replication cluster 1	Ribosome-associated heat shock protein implicated in the recycling of the 50S subunit (S4 paralog)	fig|28198.16.peg.103	yes	fig|367737.4.peg.1259	yes
A and B	Clustering-based subsystems	no subcategory	KH domain RNA binding protein YlqC	16S rRNA processing protein RimM	fig|28198.16.peg.658	yes	fig|367737.4.peg.1920	yes
A and B	Clustering-based subsystems	no subcategory	KH domain RNA binding protein YlqC	KH domain RNA binding protein YlqC	fig|28198.16.peg.657	yes	fig|367737.4.peg.1921	yes
A and B	Clustering-based subsystems	no subcategory	LSU ribosomal proteins cluster	LSU ribosomal protein L10p (P0)	fig|28198.16.peg.463	yes	fig|367737.4.peg.1846	yes
A and B	Clustering-based subsystems	no subcategory	LSU ribosomal proteins cluster	LSU ribosomal protein L11p (L12e)	fig|28198.16.peg.461,fig|28198.16.peg.1944	yes	fig|367737.4.peg.1848	yes
A and B	Clustering-based subsystems	no subcategory	LSU ribosomal proteins cluster	LSU ribosomal protein L1p (L10Ae)	fig|28198.16.peg.462,fig|28198.16.peg.1945	yes	fig|367737.4.peg.1847	yes
A and B	Clustering-based subsystems	no subcategory	LSU ribosomal proteins cluster	LSU ribosomal protein L7/L12 (P1/P2)	fig|28198.16.peg.464	yes	fig|367737.4.peg.1845	yes
A and B	Clustering-based subsystems	no subcategory	LSU ribosomal proteins cluster	Preprotein translocase subunit SecE (TC 3.A.5.1.1)	fig|28198.16.peg.459	yes	fig|367737.4.peg.1850	yes
A and B	Clustering-based subsystems	no subcategory	LSU ribosomal proteins cluster	Transcription antitermination protein NusG	fig|28198.16.peg.460	yes	fig|367737.4.peg.1849	yes
A and B	Clustering-based subsystems	no subcategory	NusA-TFII Cluster	FIG000325: clustered with transcription termination protein NusA	fig|28198.16.peg.266	yes	fig|367737.4.peg.1990	yes
A and B	Clustering-based subsystems	no subcategory	NusA-TFII Cluster	Ribosome-binding factor A	fig|28198.16.peg.265	yes	fig|367737.4.peg.1989	yes
A and B	Clustering-based subsystems	no subcategory	NusA-TFII Cluster	Transcription termination protein NusA	fig|28198.16.peg.1640	yes	fig|367737.4.peg.238	yes
A and B	Clustering-based subsystems	no subcategory	NusA-TFII Cluster	Translation initiation factor 2	fig|28198.16.peg.262,fig|28198.16.peg.263,fig|28198.16.peg.264	yes	fig|367737.4.peg.1988	yes
A and B	Clustering-based subsystems	no subcategory	Purine salvage cluster	Exodeoxyribonuclease VII large subunit (EC 3.1.11.6)	fig|28198.16.peg.1071	yes	fig|367737.4.peg.417	yes
A and B	Clustering-based subsystems	no subcategory	Purine salvage cluster	Exodeoxyribonuclease VII small subunit (EC 3.1.11.6)	fig|28198.16.peg.509	yes	fig|367737.4.peg.1353	yes
A and B	Clustering-based subsystems	no subcategory	Purine salvage cluster	Inosine-5'-monophosphate dehydrogenase (EC 1.1.1.205)	fig|28198.16.peg.1115	yes	fig|367737.4.peg.1009	yes
A and B	Clustering-based subsystems	no subcategory	RNA modification and chromosome partitioning cluster	Chromosome (plasmid) partitioning protein ParA	fig|28198.16.peg.317,fig|28198.16.peg.1759	yes	fig|367737.4.peg.1575	yes
A and B	Clustering-based subsystems	no subcategory	RNA modification and chromosome partitioning cluster	Chromosome (plasmid) partitioning protein ParB	fig|28198.16.peg.318	yes	fig|367737.4.peg.1574	yes
A and B	Clustering-based subsystems	no subcategory	RNA modification and chromosome partitioning cluster	GTPase and tRNA-U34 5-formylation enzyme TrmE	fig|28198.16.peg.831,fig|28198.16.peg.832	yes	fig|367737.4.peg.1593	yes
A and B	Clustering-based subsystems	no subcategory	RNA modification and chromosome partitioning cluster	rRNA small subunit 7-methylguanosine (m7G) methyltransferase GidB	fig|28198.16.peg.1301	yes	fig|367737.4.peg.1218	yes
A and B	Clustering-based subsystems	no subcategory	RNA modification and chromosome partitioning cluster	tRNA uridine 5-carboxymethylaminomethyl modification enzyme GidA	fig|28198.16.peg.1037,fig|28198.16.peg.1038	yes	fig|367737.4.peg.2151	yes
A and B	Clustering-based subsystems	no subcategory	RNA modification cluster	GTPase and tRNA-U34 5-formylation enzyme TrmE	fig|28198.16.peg.831,fig|28198.16.peg.832	yes	fig|367737.4.peg.1593	yes
A and B	Clustering-based subsystems	no subcategory	RNA modification cluster	Inner membrane protein translocase component YidC, long form	fig|28198.16.peg.834,fig|28198.16.peg.835	yes	fig|367737.4.peg.1595	yes
A and B	Clustering-based subsystems	no subcategory	RNA modification cluster	LSU ribosomal protein L34p	fig|28198.16.peg.837	yes	fig|367737.4.peg.1598	yes
A and B	Clustering-based subsystems	no subcategory	RNA modification cluster	Ribonuclease P protein component (EC 3.1.26.5)	fig|28198.16.peg.836	yes	fig|367737.4.peg.1597	yes
A and B	Clustering-based subsystems	no subcategory	Ribosome recycling related cluster	ATP-dependent Clp protease ATP-binding subunit ClpA	fig|28198.16.peg.1590	yes	fig|367737.4.peg.1869	yes
A and B	Clustering-based subsystems	no subcategory	Ribosome recycling related cluster	Ribosome recycling factor	fig|28198.16.peg.900,fig|28198.16.peg.1924	yes	fig|367737.4.peg.2214	yes
A and B	Clustering-based subsystems	no subcategory	Ribosome recycling related cluster	SSU ribosomal protein S2p (SAe)	fig|28198.16.peg.1197	yes	fig|367737.4.peg.527	yes
A and B	Clustering-based subsystems	no subcategory	Ribosome recycling related cluster	Translation elongation factor Ts	fig|28198.16.peg.1198,fig|28198.16.peg.1976	yes	fig|367737.4.peg.528	yes
A and B	Clustering-based subsystems	no subcategory	Stationary phase repair cluster	2-C-methyl-D-erythritol 2,4-cyclodiphosphate synthase (EC 4.6.1.12)	fig|28198.16.peg.734	yes	fig|367737.4.peg.126	yes
A and B	Clustering-based subsystems	no subcategory	Stationary phase repair cluster	2-C-methyl-D-erythritol 4-phosphate cytidylyltransferase (EC 2.7.7.60)	fig|28198.16.peg.734	yes	fig|367737.4.peg.126	yes
A and B	Clustering-based subsystems	no subcategory	Stationary phase repair cluster	5-nucleotidase SurE (EC 3.1.3.5)	fig|28198.16.peg.1360	yes	fig|367737.4.peg.2204	yes
A and B	Clustering-based subsystems	no subcategory	Stationary phase repair cluster	tRNA pseudouridine 13 synthase (EC 4.2.1.-)	fig|28198.16.peg.490,fig|28198.16.peg.1637	yes	fig|367737.4.peg.2057,fig|367737.4.peg.729	yes
A and B	Clustering-based subsystems	no subcategory	Transcription repair cluster	Arsenate reductase (EC 1.20.4.1)	fig|28198.16.peg.1326,fig|28198.16.peg.1625,fig|28198.16.peg.1964	yes	fig|367737.4.peg.1362,fig|367737.4.peg.1883,fig|367737.4.peg.220	yes
A and B	Clustering-based subsystems	no subcategory	Transcription repair cluster	Glucosamine-1-phosphate N-acetyltransferase (EC 2.3.1.157)	fig|28198.16.peg.976,fig|28198.16.peg.977	yes	fig|367737.4.peg.2144	yes
A and B	Clustering-based subsystems	no subcategory	Transcription repair cluster	LSU ribosomal protein L25p	fig|28198.16.peg.588	yes	fig|367737.4.peg.625	yes
A and B	Clustering-based subsystems	no subcategory	Transcription repair cluster	N-acetylglucosamine-1-phosphate uridyltransferase (EC 2.7.7.23)	fig|28198.16.peg.976,fig|28198.16.peg.977	yes	fig|367737.4.peg.2144	yes
A and B	Clustering-based subsystems	no subcategory	Transcription repair cluster	Peptidyl-tRNA hydrolase (EC 3.1.1.29)	fig|28198.16.peg.589	yes	fig|367737.4.peg.626	yes
A and B	Clustering-based subsystems	no subcategory	Transcription repair cluster	Ribose-phosphate pyrophosphokinase (EC 2.7.6.1)	fig|28198.16.peg.1616	yes	fig|367737.4.peg.475	yes
A and B	Clustering-based subsystems	no subcategory	Transcription repair cluster	Transcription-repair coupling factor	fig|28198.16.peg.907	yes	fig|367737.4.peg.402	yes
A	Clustering-based subsystems	no subcategory	CBSS-160492.1.peg.550	Predicted endonuclease distantly related to archaeal Holliday junction resolvase	fig|28198.16.peg.1260	yes		no
A	Clustering-based subsystems	no subcategory	CBSS-272943.3.peg.1367	Rossmann fold nucleotide-binding protein Smf possibly involved in DNA uptake	fig|28198.16.peg.1333	yes		no
A	Clustering-based subsystems	no subcategory	CBSS-316275.9.peg.382	FIG001826: putative inner membrane protein	fig|28198.16.peg.1535	yes		no
A	Clustering-based subsystems	no subcategory	CBSS-316275.9.peg.382	FIG023911: putative membrane protein	fig|28198.16.peg.1533,fig|28198.16.peg.1534,fig|28198.16.peg.1915	yes		no
A	Clustering-based subsystems	no subcategory	CBSS-56780.10.peg.1536	Magnesium and cobalt efflux protein CorC	fig|28198.16.peg.56	yes		no
A	Clustering-based subsystems	no subcategory	Stationary phase repair cluster	FIG139438: lipoprotein B	fig|28198.16.peg.240	yes		no
B	Clustering-based subsystems	no subcategory	Bacterial Cell Division	Cell division protein FtsW		no	fig|367737.4.peg.1865	yes
B	Clustering-based subsystems	no subcategory	Bacterial Cell Division	GTP-binding protein Era		no	fig|367737.4.peg.1670	yes
B	Clustering-based subsystems	no subcategory	Bacterial RNA-metabolizing Zn-dependent hydrolases	Cytochrome d ubiquinol oxidase subunit II (EC 1.10.3.-)		no	fig|367737.4.peg.1076	yes
B	Clustering-based subsystems	no subcategory	Bacterial RNA-metabolizing Zn-dependent hydrolases	Trk system potassium uptake protein TrkA		no	fig|367737.4.peg.1269	yes
B	Clustering-based subsystems	no subcategory	CBSS-192222.1.peg.655	3-deoxy-D-manno-octulosonic-acid transferase (EC 2.-.-.-)		no	fig|367737.4.peg.1925	yes
B	Clustering-based subsystems	no subcategory	CBSS-192222.1.peg.655	FIG042796: Hypothetical protein		no	fig|367737.4.peg.1927	yes
B	Clustering-based subsystems	no subcategory	CBSS-296591.1.peg.2330	Alpha-1,3-N-acetylgalactosamine transferase PglA (EC 2.4.1.-)		no	fig|367737.4.peg.666	yes
B	Clustering-based subsystems	no subcategory	CBSS-296591.1.peg.2330	Lipid carrier : UDP-N-acetylgalactosaminyltransferase (EC 2.4.1.-)		no	fig|367737.4.peg.666	yes
B	Clustering-based subsystems	no subcategory	CBSS-296591.1.peg.2330	NAD-dependent epimerase/dehydratase		no	fig|367737.4.peg.849	yes
B	Clustering-based subsystems	no subcategory	CBSS-296591.1.peg.2330	Putative glycosyltransferase		no	fig|367737.4.peg.666	yes
B	Clustering-based subsystems	no subcategory	CBSS-296591.1.peg.2330	UDP-N-acetylglucosamine 4,6-dehydratase (EC 4.2.1.-)		no	fig|367737.4.peg.682	yes
B	Clustering-based subsystems	no subcategory	CBSS-296591.1.peg.2330	dTDP-glucose 4,6-dehydratase (EC 4.2.1.46)		no	fig|367737.4.peg.1784,fig|367737.4.peg.647	yes
B	Clustering-based subsystems	no subcategory	CBSS-312309.3.peg.1965	Uridine monophosphate kinase (EC 2.7.4.22)		no	fig|367737.4.peg.634	yes
B	Clustering-based subsystems	no subcategory	Conserved gene cluster associated with Met-tRNA formyltransferase	Methionyl-tRNA formyltransferase (EC 2.1.2.9)		no	fig|367737.4.peg.1579	yes
B	Clustering-based subsystems	no subcategory	KH domain RNA binding protein YlqC	SSU ribosomal protein S16p		no	fig|367737.4.peg.1922	yes
B	Clustering-based subsystems	no subcategory	Llipid A biosynthesis cluster	UDP-3-O-[3-hydroxymyristoyl] glucosamine N-acyltransferase (EC 2.3.1.-)		no	fig|367737.4.peg.1146	yes
B	Clustering-based subsystems	no subcategory	Purine salvage cluster	CBS domain		no	fig|367737.4.peg.1009	yes
A and B	Clustering-based subsystems	proteosome related	Cluster-based Subsystem Grouping Hypotheticals - perhaps Proteosome Related	Twin-arginine translocation protein TatA	fig|28198.16.peg.479,fig|28198.16.peg.480	yes	fig|367737.4.peg.2067,fig|367737.4.peg.2068	yes
A and B	Clustering-based subsystems	proteosome related	Cluster-based Subsystem Grouping Hypotheticals - perhaps Proteosome Related	Twin-arginine translocation protein TatC	fig|28198.16.peg.183	yes	fig|367737.4.peg.1237	yes
A and B	Cofactors, Vitamins, Prosthetic Groups, Pigments	Biotin	Biotin biosynthesis Experimental	8-amino-7-oxononanoate synthase (EC 2.3.1.47)	fig|28198.16.peg.1259	yes	fig|367737.4.peg.246	yes
A and B	Cofactors, Vitamins, Prosthetic Groups, Pigments	Biotin	Biotin biosynthesis Experimental	Biotin synthase (EC 2.8.1.6)	fig|28198.16.peg.1559	yes	fig|367737.4.peg.2178	yes
A and B	Cofactors, Vitamins, Prosthetic Groups, Pigments	Biotin	Biotin biosynthesis Experimental	Dethiobiotin synthetase (EC 6.3.3.3)	fig|28198.16.peg.1962	yes	fig|367737.4.peg.1871	yes
A	Cofactors, Vitamins, Prosthetic Groups, Pigments	Biotin	Biotin biosynthesis Experimental	Biotin synthesis protein BioC	fig|28198.16.peg.902	yes		no
B	Cofactors, Vitamins, Prosthetic Groups, Pigments	Biotin	Biotin biosynthesis	Adenosylmethionine-8-amino-7-oxononanoate aminotransferase (EC 2.6.1.62)		no	fig|367737.4.peg.1609	yes
A and B	Cofactors, Vitamins, Prosthetic Groups, Pigments	Coenzyme A	Coenzyme A Biosynthesis	3-methyl-2-oxobutanoate hydroxymethyltransferase (EC 2.1.2.11)	fig|28198.16.peg.998	yes	fig|367737.4.peg.1749	yes
A and B	Cofactors, Vitamins, Prosthetic Groups, Pigments	Coenzyme A	Coenzyme A Biosynthesis	Aspartate 1-decarboxylase (EC 4.1.1.11)	fig|28198.16.peg.1068	yes	fig|367737.4.peg.420	yes
A and B	Cofactors, Vitamins, Prosthetic Groups, Pigments	Coenzyme A	Coenzyme A Biosynthesis	Dephospho-CoA kinase (EC 2.7.1.24)	fig|28198.16.peg.288	yes	fig|367737.4.peg.143	yes
A and B	Cofactors, Vitamins, Prosthetic Groups, Pigments	Coenzyme A	Coenzyme A Biosynthesis	Ketol-acid reductoisomerase (EC 1.1.1.86)	fig|28198.16.peg.1647,fig|28198.16.peg.1648	yes	fig|367737.4.peg.229	yes
A and B	Cofactors, Vitamins, Prosthetic Groups, Pigments	Coenzyme A	Coenzyme A Biosynthesis	Pantoate--beta-alanine ligase (EC 6.3.2.1)	fig|28198.16.peg.1386	yes	fig|367737.4.peg.207	yes
A and B	Cofactors, Vitamins, Prosthetic Groups, Pigments	Coenzyme A	Coenzyme A Biosynthesis	Pantothenate kinase type III, CoaX-like (EC 2.7.1.33)	fig|28198.16.peg.1739	yes	fig|367737.4.peg.314	yes
A and B	Cofactors, Vitamins, Prosthetic Groups, Pigments	Coenzyme A	Coenzyme A Biosynthesis	Phosphopantothenoylcysteine decarboxylase (EC 4.1.1.36)	fig|28198.16.peg.978	yes	fig|367737.4.peg.2143	yes
A and B	Cofactors, Vitamins, Prosthetic Groups, Pigments	Coenzyme A	Coenzyme A Biosynthesis	Phosphopantothenoylcysteine synthetase (EC 6.3.2.5)	fig|28198.16.peg.978	yes	fig|367737.4.peg.2143	yes
A and B	Cofactors, Vitamins, Prosthetic Groups, Pigments	Coenzyme A	Coenzyme A Biosynthesis cluster	3-methyl-2-oxobutanoate hydroxymethyltransferase (EC 2.1.2.11)	fig|28198.16.peg.998	yes	fig|367737.4.peg.1749	yes
A and B	Cofactors, Vitamins, Prosthetic Groups, Pigments	Coenzyme A	Coenzyme A Biosynthesis cluster	Aspartate 1-decarboxylase (EC 4.1.1.11)	fig|28198.16.peg.1068	yes	fig|367737.4.peg.420	yes
A and B	Cofactors, Vitamins, Prosthetic Groups, Pigments	Coenzyme A	Coenzyme A Biosynthesis cluster	Pantoate--beta-alanine ligase (EC 6.3.2.1)	fig|28198.16.peg.1386	yes	fig|367737.4.peg.207	yes
A and B	Cofactors, Vitamins, Prosthetic Groups, Pigments	Coenzyme A	Coenzyme A Biosynthesis cluster	Pantothenate kinase type III, CoaX-like (EC 2.7.1.33)	fig|28198.16.peg.1739	yes	fig|367737.4.peg.314	yes
B	Cofactors, Vitamins, Prosthetic Groups, Pigments	Coenzyme A	Coenzyme A Biosynthesis	Phosphopantetheine adenylyltransferase (EC 2.7.7.3)		no	fig|367737.4.peg.953	yes
A and B	Cofactors, Vitamins, Prosthetic Groups, Pigments	Folate and pterines	5-FCL-like protein	5,10-methylenetetrahydrofolate reductase (EC 1.5.1.20)	fig|28198.16.peg.1521	yes	fig|367737.4.peg.212	yes
A and B	Cofactors, Vitamins, Prosthetic Groups, Pigments	Folate and pterines	5-FCL-like protein	5-formyltetrahydrofolate cyclo-ligase (EC 6.3.3.2)	fig|28198.16.peg.1416	yes	fig|367737.4.peg.875	yes
A and B	Cofactors, Vitamins, Prosthetic Groups, Pigments	Folate and pterines	5-FCL-like protein	Alternative dihydrofolate reductase 2	fig|28198.16.peg.42	yes	fig|367737.4.peg.1188	yes
A and B	Cofactors, Vitamins, Prosthetic Groups, Pigments	Folate and pterines	5-FCL-like protein	Dihydrolipoamide acetyltransferase component of pyruvate dehydrogenase complex (EC 2.3.1.12)	fig|28198.16.peg.1665	yes	fig|367737.4.peg.1449	yes
A and B	Cofactors, Vitamins, Prosthetic Groups, Pigments	Folate and pterines	5-FCL-like protein	Formyltetrahydrofolate deformylase (EC 3.5.1.10)	fig|28198.16.peg.954	yes	fig|367737.4.peg.1065	yes
A and B	Cofactors, Vitamins, Prosthetic Groups, Pigments	Folate and pterines	5-FCL-like protein	Isocitrate dehydrogenase [NADP] (EC 1.1.1.42)	fig|28198.16.peg.60,fig|28198.16.peg.1906	yes	fig|367737.4.peg.1294	yes
A and B	Cofactors, Vitamins, Prosthetic Groups, Pigments	Folate and pterines	5-FCL-like protein	Phosphomethylpyrimidine kinase (EC 2.7.4.7)	fig|28198.16.peg.350,fig|28198.16.peg.351	yes	fig|367737.4.peg.1730	yes
A and B	Cofactors, Vitamins, Prosthetic Groups, Pigments	Folate and pterines	5-FCL-like protein	Phosphoribosylaminoimidazolecarboxamide formyltransferase (EC 2.1.2.3)	fig|28198.16.peg.1733,fig|28198.16.peg.1734	yes	fig|367737.4.peg.1611	yes
A and B	Cofactors, Vitamins, Prosthetic Groups, Pigments	Folate and pterines	5-FCL-like protein	Phosphoribosylglycinamide formyltransferase (EC 2.1.2.2)	fig|28198.16.peg.567	yes	fig|367737.4.peg.2271	yes
A and B	Cofactors, Vitamins, Prosthetic Groups, Pigments	Folate and pterines	5-FCL-like protein	Pyruvate dehydrogenase E1 component (EC 1.2.4.1)	fig|28198.16.peg.1664	yes	fig|367737.4.peg.1448	yes
A and B	Cofactors, Vitamins, Prosthetic Groups, Pigments	Folate and pterines	5-FCL-like protein	Serine hydroxymethyltransferase (EC 2.1.2.1)	fig|28198.16.peg.1428	yes	fig|367737.4.peg.1437,fig|367737.4.peg.640	yes
A and B	Cofactors, Vitamins, Prosthetic Groups, Pigments	Folate and pterines	5-FCL-like protein	Succinate dehydrogenase iron-sulfur protein (EC 1.3.99.1)	fig|28198.16.peg.405	yes	fig|367737.4.peg.292	yes
A and B	Cofactors, Vitamins, Prosthetic Groups, Pigments	Folate and pterines	5-FCL-like protein	Thiamin-phosphate pyrophosphorylase (EC 2.5.1.3)	fig|28198.16.peg.1305	yes	fig|367737.4.peg.440	yes
A and B	Cofactors, Vitamins, Prosthetic Groups, Pigments	Folate and pterines	5-FCL-like protein	Thiamine-monophosphate kinase (EC 2.7.4.16)	fig|28198.16.peg.1638	yes	fig|367737.4.peg.728	yes
A and B	Cofactors, Vitamins, Prosthetic Groups, Pigments	Folate and pterines	Folate Biosynthesis	2-amino-4-hydroxy-6-hydroxymethyldihydropteridine pyrophosphokinase (EC 2.7.6.3)	fig|28198.16.peg.1377	yes	fig|367737.4.peg.479	yes
A and B	Cofactors, Vitamins, Prosthetic Groups, Pigments	Folate and pterines	Folate Biosynthesis	5-formyltetrahydrofolate cyclo-ligase (EC 6.3.3.2)	fig|28198.16.peg.1416	yes	fig|367737.4.peg.875	yes
A and B	Cofactors, Vitamins, Prosthetic Groups, Pigments	Folate and pterines	Folate Biosynthesis	Alternative dihydrofolate reductase 2	fig|28198.16.peg.42	yes	fig|367737.4.peg.1188	yes
A and B	Cofactors, Vitamins, Prosthetic Groups, Pigments	Folate and pterines	Folate Biosynthesis	Dihydrofolate synthase (EC 6.3.2.12)	fig|28198.16.peg.912	yes	fig|367737.4.peg.396	yes
A and B	Cofactors, Vitamins, Prosthetic Groups, Pigments	Folate and pterines	Folate Biosynthesis	Dihydroneopterin aldolase (EC 4.1.2.25)	fig|28198.16.peg.252	yes	fig|367737.4.peg.1978	yes
A and B	Cofactors, Vitamins, Prosthetic Groups, Pigments	Folate and pterines	Folate Biosynthesis	Dihydropteroate synthase (EC 2.5.1.15)	fig|28198.16.peg.42	yes	fig|367737.4.peg.1188	yes
A and B	Cofactors, Vitamins, Prosthetic Groups, Pigments	Folate and pterines	Folate Biosynthesis	Folylpolyglutamate synthase (EC 6.3.2.17)	fig|28198.16.peg.912	yes	fig|367737.4.peg.396	yes
A and B	Cofactors, Vitamins, Prosthetic Groups, Pigments	Folate and pterines	Folate Biosynthesis	GTP cyclohydrolase I (EC 3.5.4.16) type 1	fig|28198.16.peg.718	yes	fig|367737.4.peg.1615	yes
A and B	Cofactors, Vitamins, Prosthetic Groups, Pigments	Folate and pterines	Folate Biosynthesis	Para-aminobenzoate synthase, amidotransferase component (EC 2.6.1.85)	fig|28198.16.peg.1315	yes	fig|367737.4.peg.1949	yes
A and B	Cofactors, Vitamins, Prosthetic Groups, Pigments	Folate and pterines	Folate Biosynthesis	Thymidylate synthase thyX (EC 2.1.1.-)	fig|28198.16.peg.1699	yes	fig|367737.4.peg.2267	yes
A and B	Cofactors, Vitamins, Prosthetic Groups, Pigments	Folate and pterines	Folate biosynthesis cluster	2-amino-4-hydroxy-6-hydroxymethyldihydropteridine pyrophosphokinase (EC 2.7.6.3)	fig|28198.16.peg.1377	yes	fig|367737.4.peg.479	yes
A and B	Cofactors, Vitamins, Prosthetic Groups, Pigments	Folate and pterines	Folate biosynthesis cluster	Aspartate 1-decarboxylase (EC 4.1.1.11)	fig|28198.16.peg.1068	yes	fig|367737.4.peg.420	yes
A and B	Cofactors, Vitamins, Prosthetic Groups, Pigments	Folate and pterines	Folate biosynthesis cluster	Cell division protein FtsH (EC 3.4.24.-)	fig|28198.16.peg.89,fig|28198.16.peg.963,fig|28198.16.peg.1340,fig|28198.16.peg.1341,fig|28198.16.peg.1342	yes	fig|367737.4.peg.445	yes
A and B	Cofactors, Vitamins, Prosthetic Groups, Pigments	Folate and pterines	Folate biosynthesis cluster	Dihydroneopterin aldolase (EC 4.1.2.25)	fig|28198.16.peg.252	yes	fig|367737.4.peg.1978	yes
A and B	Cofactors, Vitamins, Prosthetic Groups, Pigments	Folate and pterines	Folate biosynthesis cluster	Dihydropteroate synthase (EC 2.5.1.15)	fig|28198.16.peg.42	yes	fig|367737.4.peg.1188	yes
A and B	Cofactors, Vitamins, Prosthetic Groups, Pigments	Folate and pterines	Folate biosynthesis cluster	GTP cyclohydrolase I (EC 3.5.4.16) type 1	fig|28198.16.peg.718	yes	fig|367737.4.peg.1615	yes
A and B	Cofactors, Vitamins, Prosthetic Groups, Pigments	Folate and pterines	Folate biosynthesis cluster	Pantoate--beta-alanine ligase (EC 6.3.2.1)	fig|28198.16.peg.1386	yes	fig|367737.4.peg.207	yes
A and B	Cofactors, Vitamins, Prosthetic Groups, Pigments	Folate and pterines	Folate biosynthesis cluster	tRNA(Ile)-lysidine synthetase (EC 6.3.4.19)	fig|28198.16.peg.1389	yes	fig|367737.4.peg.205	yes
A and B	Cofactors, Vitamins, Prosthetic Groups, Pigments	Folate and pterines	Molybdenum cofactor biosynthesis	DNA-binding domain of ModE	fig|28198.16.peg.551	yes	fig|367737.4.peg.13	yes
A and B	Cofactors, Vitamins, Prosthetic Groups, Pigments	Folate and pterines	Molybdenum cofactor biosynthesis	GTP cyclohydrolase I (EC 3.5.4.16) type 1	fig|28198.16.peg.718	yes	fig|367737.4.peg.1615	yes
A and B	Cofactors, Vitamins, Prosthetic Groups, Pigments	Folate and pterines	Molybdenum cofactor biosynthesis	GTP cyclohydrolase II (EC 3.5.4.25)	fig|28198.16.peg.142,fig|28198.16.peg.1302	yes	fig|367737.4.peg.1213,fig|367737.4.peg.1219	yes
A and B	Cofactors, Vitamins, Prosthetic Groups, Pigments	Folate and pterines	Molybdenum cofactor biosynthesis	Molybdate-binding domain of ModE	fig|28198.16.peg.551	yes	fig|367737.4.peg.13	yes
A and B	Cofactors, Vitamins, Prosthetic Groups, Pigments	Folate and pterines	Molybdenum cofactor biosynthesis	Molybdenum ABC transporter, periplasmic molybdenum-binding protein ModA (TC 3.A.1.8.1)	fig|28198.16.peg.552,fig|28198.16.peg.1629	yes	fig|367737.4.peg.12	yes
A and B	Cofactors, Vitamins, Prosthetic Groups, Pigments	Folate and pterines	Molybdenum cofactor biosynthesis	Molybdenum cofactor biosynthesis protein MoaA	fig|28198.16.peg.826	yes	fig|367737.4.peg.362	yes
A and B	Cofactors, Vitamins, Prosthetic Groups, Pigments	Folate and pterines	Molybdenum cofactor biosynthesis	Molybdenum cofactor biosynthesis protein MoaC	fig|28198.16.peg.1357	yes	fig|367737.4.peg.2207	yes
A and B	Cofactors, Vitamins, Prosthetic Groups, Pigments	Folate and pterines	Molybdenum cofactor biosynthesis	Molybdenum cofactor biosynthesis protein MoaD	fig|28198.16.peg.1659	yes	fig|367737.4.peg.1861	yes
A and B	Cofactors, Vitamins, Prosthetic Groups, Pigments	Folate and pterines	Molybdenum cofactor biosynthesis	Molybdenum cofactor biosynthesis protein MoaE	fig|28198.16.peg.1660	yes	fig|367737.4.peg.1860	yes
A and B	Cofactors, Vitamins, Prosthetic Groups, Pigments	Folate and pterines	Molybdenum cofactor biosynthesis	Molybdenum transport ATP-binding protein ModC (TC 3.A.1.8.1)	fig|28198.16.peg.554,fig|28198.16.peg.1632	yes	fig|367737.4.peg.9	yes
A and B	Cofactors, Vitamins, Prosthetic Groups, Pigments	Folate and pterines	Molybdenum cofactor biosynthesis	Molybdenum transport system permease protein ModB (TC 3.A.1.8.1)	fig|28198.16.peg.1631	yes	fig|367737.4.peg.10	yes
A and B	Cofactors, Vitamins, Prosthetic Groups, Pigments	Folate and pterines	Molybdenum cofactor biosynthesis	Molybdopterin biosynthesis molybdochelatase MogA	fig|28198.16.peg.87	yes	fig|367737.4.peg.1118	yes
A and B	Cofactors, Vitamins, Prosthetic Groups, Pigments	Folate and pterines	Molybdenum cofactor biosynthesis	Molybdopterin biosynthesis protein MoeA	fig|28198.16.peg.22,fig|28198.16.peg.701	yes	fig|367737.4.peg.1469,fig|367737.4.peg.521	yes
A and B	Cofactors, Vitamins, Prosthetic Groups, Pigments	Folate and pterines	Molybdenum cofactor biosynthesis	Molybdopterin-guanine dinucleotide biosynthesis protein MobA	fig|28198.16.peg.765,fig|28198.16.peg.1822	yes	fig|367737.4.peg.78	yes
A and B	Cofactors, Vitamins, Prosthetic Groups, Pigments	Folate and pterines	Molybdenum cofactor biosynthesis	Molybdopterin-guanine dinucleotide biosynthesis protein MobB	fig|28198.16.peg.151	yes	fig|367737.4.peg.1204	yes
A	Cofactors, Vitamins, Prosthetic Groups, Pigments	Folate and pterines	5-FCL-like protein	Hydroxyethylthiazole kinase (EC 2.7.1.50)	fig|28198.16.peg.1163	yes		no
B	Cofactors, Vitamins, Prosthetic Groups, Pigments	Folate and pterines	5-FCL-like protein	Alcohol dehydrogenase (EC 1.1.1.1)		no	fig|367737.4.peg.27,fig|367737.4.peg.771	yes
A and B	Cofactors, Vitamins, Prosthetic Groups, Pigments	Lipoic acid	Lipoic acid metabolism	Lipoate synthase	fig|28198.16.peg.1516	yes	fig|367737.4.peg.1446	yes
A and B	Cofactors, Vitamins, Prosthetic Groups, Pigments	Lipoic acid	Lipoic acid metabolism	Lipoate-protein ligase A	fig|28198.16.peg.1515	yes	fig|367737.4.peg.1447	yes
A and B	Cofactors, Vitamins, Prosthetic Groups, Pigments	NAD and NADP	NAD and NADP cofactor biosynthesis global	C-terminal domain of CinA type S	fig|28198.16.peg.985,fig|28198.16.peg.985	yes	fig|367737.4.peg.502	yes
A and B	Cofactors, Vitamins, Prosthetic Groups, Pigments	NAD and NADP	NAD and NADP cofactor biosynthesis global	L-aspartate oxidase (EC 1.4.3.16)	fig|28198.16.peg.946	yes	fig|367737.4.peg.907	yes
A and B	Cofactors, Vitamins, Prosthetic Groups, Pigments	NAD and NADP	NAD and NADP cofactor biosynthesis global	NAD kinase (EC 2.7.1.23)	fig|28198.16.peg.601	yes	fig|367737.4.peg.1935	yes
A and B	Cofactors, Vitamins, Prosthetic Groups, Pigments	NAD and NADP	NAD and NADP cofactor biosynthesis global	NAD synthetase (EC 6.3.1.5)	fig|28198.16.peg.177	yes	fig|367737.4.peg.1232	yes
A and B	Cofactors, Vitamins, Prosthetic Groups, Pigments	NAD and NADP	NAD and NADP cofactor biosynthesis global	Nicotinate-nucleotide adenylyltransferase (EC 2.7.7.18)	fig|28198.16.peg.1463	yes	fig|367737.4.peg.2070,fig|367737.4.peg.2071	yes
A and B	Cofactors, Vitamins, Prosthetic Groups, Pigments	NAD and NADP	NAD and NADP cofactor biosynthesis global	Quinolinate phosphoribosyltransferase [decarboxylating] (EC 2.4.2.19)	fig|28198.16.peg.255	yes	fig|367737.4.peg.1981	yes
A and B	Cofactors, Vitamins, Prosthetic Groups, Pigments	NAD and NADP	NAD and NADP cofactor biosynthesis global	Quinolinate synthetase (EC 2.5.1.72)	fig|28198.16.peg.254	yes	fig|367737.4.peg.1980	yes
B	Cofactors, Vitamins, Prosthetic Groups, Pigments	NAD and NADP	NAD and NADP cofactor biosynthesis global	ADP-ribose pyrophosphatase (EC 3.6.1.13)		no	fig|367737.4.peg.783	yes
B	Cofactors, Vitamins, Prosthetic Groups, Pigments	NAD and NADP	NAD and NADP cofactor biosynthesis global	DNA ligase (EC 6.5.1.2)		no	fig|367737.4.peg.1053	yes
A and B	Cofactors, Vitamins, Prosthetic Groups, Pigments	Pyridoxine	Pyridoxin (Vitamin B6) Biosynthesis	1-deoxy-D-xylulose 5-phosphate synthase (EC 2.2.1.7)	fig|28198.16.peg.1472	yes	fig|367737.4.peg.2079	yes
A and B	Cofactors, Vitamins, Prosthetic Groups, Pigments	Pyridoxine	Pyridoxin (Vitamin B6) Biosynthesis	4-hydroxythreonine-4-phosphate dehydrogenase (EC 1.1.1.262)	fig|28198.16.peg.1432	yes	fig|367737.4.peg.636	yes
A and B	Cofactors, Vitamins, Prosthetic Groups, Pigments	Pyridoxine	Pyridoxin (Vitamin B6) Biosynthesis	D-3-phosphoglycerate dehydrogenase (EC 1.1.1.95)	fig|28198.16.peg.275	yes	fig|367737.4.peg.1993	yes
A and B	Cofactors, Vitamins, Prosthetic Groups, Pigments	Pyridoxine	Pyridoxin (Vitamin B6) Biosynthesis	NAD-dependent glyceraldehyde-3-phosphate dehydrogenase (EC 1.2.1.12)	fig|28198.16.peg.291,fig|28198.16.peg.292,fig|28198.16.peg.1464	yes	fig|367737.4.peg.2072	yes
A and B	Cofactors, Vitamins, Prosthetic Groups, Pigments	Pyridoxine	Pyridoxin (Vitamin B6) Biosynthesis	Phosphoserine aminotransferase (EC 2.6.1.52)	fig|28198.16.peg.300	yes	fig|367737.4.peg.134	yes
A and B	Cofactors, Vitamins, Prosthetic Groups, Pigments	Pyridoxine	Pyridoxin (Vitamin B6) Biosynthesis	Pyridoxine 5'-phosphate synthase (EC 2.6.99.2)	fig|28198.16.peg.1431	yes	fig|367737.4.peg.637	yes
B	Cofactors, Vitamins, Prosthetic Groups, Pigments	Pyridoxine	Pyridoxin (Vitamin B6) Biosynthesis	Pyridoxamine 5'-phosphate oxidase (EC 1.4.3.5)		no	fig|367737.4.peg.1512	yes
A and B	Cofactors, Vitamins, Prosthetic Groups, Pigments	Quinone cofactors	Menaquinone Biosynthesis via Futalosine -- gjo	2-heptaprenyl-1,4-naphthoquinone methyltransferase (EC 2.1.1.163)	fig|28198.16.peg.1072	yes	fig|367737.4.peg.416	yes
A and B	Cofactors, Vitamins, Prosthetic Groups, Pigments	Quinone cofactors	Menaquinone Biosynthesis via Futalosine -- gjo	Gene SCO4494, often clustered with other genes in menaquinone via futalosine pathway	fig|28198.16.peg.1256	yes	fig|367737.4.peg.243	yes
A and B	Cofactors, Vitamins, Prosthetic Groups, Pigments	Quinone cofactors	Menaquinone Biosynthesis via Futalosine -- gjo	Menaquinone via 6-amino-6-deoxyfutalosine step 1	fig|28198.16.peg.1658	yes	fig|367737.4.peg.1862	yes
A and B	Cofactors, Vitamins, Prosthetic Groups, Pigments	Quinone cofactors	Menaquinone Biosynthesis via Futalosine -- gjo	Menaquinone via 6-amino-6-deoxyfutalosine step 2	fig|28198.16.peg.336,fig|28198.16.peg.337	yes	fig|367737.4.peg.1558	yes
A and B	Cofactors, Vitamins, Prosthetic Groups, Pigments	Quinone cofactors	Menaquinone Biosynthesis via Futalosine -- gjo	Menaquinone via futalosine polyprenyltransferase (MenA homolog)	fig|28198.16.peg.1277	yes	fig|367737.4.peg.149	yes
A and B	Cofactors, Vitamins, Prosthetic Groups, Pigments	Quinone cofactors	Menaquinone Biosynthesis via Futalosine -- gjo	Menaquinone via futalosine step 3	fig|28198.16.peg.157	yes	fig|367737.4.peg.1198	yes
A and B	Cofactors, Vitamins, Prosthetic Groups, Pigments	Quinone cofactors	Menaquinone Biosynthesis via Futalosine -- gjo	Menaquinone via futalosine step 4	fig|28198.16.peg.1528	yes	fig|367737.4.peg.2174	yes
A and B	Cofactors, Vitamins, Prosthetic Groups, Pigments	Quinone cofactors	Menaquinone Biosynthesis via Futalosine -- gjo	UbiD family decarboxylase associated with menaquinone via futalosine	fig|28198.16.peg.1483	yes	fig|367737.4.peg.310	yes
A and B	Cofactors, Vitamins, Prosthetic Groups, Pigments	Quinone cofactors	Menaquinone Biosynthesis via Futalosine -- gjo	UbiX family decarboxylase associated with menaquinone via futalosine	fig|28198.16.peg.608	yes	fig|367737.4.peg.954	yes
A and B	Cofactors, Vitamins, Prosthetic Groups, Pigments	Riboflavin, FMN, FAD	Riboflavin, FMN and FAD metabolism	3,4-dihydroxy-2-butanone 4-phosphate synthase (EC 4.1.99.12)	fig|28198.16.peg.142	yes	fig|367737.4.peg.1119,fig|367737.4.peg.1213	yes
A and B	Cofactors, Vitamins, Prosthetic Groups, Pigments	Riboflavin, FMN, FAD	Riboflavin, FMN and FAD metabolism	5-amino-6-(5-phosphoribosylamino)uracil reductase (EC 1.1.1.193)	fig|28198.16.peg.267	yes	fig|367737.4.peg.1991	yes
A and B	Cofactors, Vitamins, Prosthetic Groups, Pigments	Riboflavin, FMN, FAD	Riboflavin, FMN and FAD metabolism	6,7-dimethyl-8-ribityllumazine synthase (EC 2.5.1.78)	fig|28198.16.peg.1159	yes	fig|367737.4.peg.1814	yes
A and B	Cofactors, Vitamins, Prosthetic Groups, Pigments	Riboflavin, FMN, FAD	Riboflavin, FMN and FAD metabolism	Diaminohydroxyphosphoribosylaminopyrimidine deaminase (EC 3.5.4.26)	fig|28198.16.peg.267	yes	fig|367737.4.peg.1991	yes
A and B	Cofactors, Vitamins, Prosthetic Groups, Pigments	Riboflavin, FMN, FAD	Riboflavin, FMN and FAD metabolism	FMN adenylyltransferase (EC 2.7.7.2)	fig|28198.16.peg.217	yes	fig|367737.4.peg.1804	yes
A and B	Cofactors, Vitamins, Prosthetic Groups, Pigments	Riboflavin, FMN, FAD	Riboflavin, FMN and FAD metabolism	GTP cyclohydrolase II (EC 3.5.4.25)	fig|28198.16.peg.142,fig|28198.16.peg.1302	yes	fig|367737.4.peg.1213,fig|367737.4.peg.1219	yes
A and B	Cofactors, Vitamins, Prosthetic Groups, Pigments	Riboflavin, FMN, FAD	Riboflavin, FMN and FAD metabolism	Riboflavin kinase (EC 2.7.1.26)	fig|28198.16.peg.217	yes	fig|367737.4.peg.1804	yes
A and B	Cofactors, Vitamins, Prosthetic Groups, Pigments	Riboflavin, FMN, FAD	Riboflavin, FMN and FAD metabolism	Riboflavin synthase eubacterial/eukaryotic (EC 2.5.1.9)	fig|28198.16.peg.1039	yes	fig|367737.4.peg.2152	yes
A and B	Cofactors, Vitamins, Prosthetic Groups, Pigments	Riboflavin, FMN, FAD	Riboflavin, FMN and FAD metabolism in plants	3,4-dihydroxy-2-butanone 4-phosphate synthase (EC 4.1.99.12)	fig|28198.16.peg.142	yes	fig|367737.4.peg.1119,fig|367737.4.peg.1213	yes
A and B	Cofactors, Vitamins, Prosthetic Groups, Pigments	Riboflavin, FMN, FAD	Riboflavin, FMN and FAD metabolism in plants	5-amino-6-(5-phosphoribosylamino)uracil reductase (EC 1.1.1.193)	fig|28198.16.peg.267	yes	fig|367737.4.peg.1991	yes
A and B	Cofactors, Vitamins, Prosthetic Groups, Pigments	Riboflavin, FMN, FAD	Riboflavin, FMN and FAD metabolism in plants	6,7-dimethyl-8-ribityllumazine synthase (EC 2.5.1.78)	fig|28198.16.peg.1159	yes	fig|367737.4.peg.1814	yes
A and B	Cofactors, Vitamins, Prosthetic Groups, Pigments	Riboflavin, FMN, FAD	Riboflavin, FMN and FAD metabolism in plants	C-terminal domain of CinA type S	fig|28198.16.peg.985	yes	fig|367737.4.peg.502	yes
A and B	Cofactors, Vitamins, Prosthetic Groups, Pigments	Riboflavin, FMN, FAD	Riboflavin, FMN and FAD metabolism in plants	Diaminohydroxyphosphoribosylaminopyrimidine deaminase (EC 3.5.4.26)	fig|28198.16.peg.267	yes	fig|367737.4.peg.1991	yes
A and B	Cofactors, Vitamins, Prosthetic Groups, Pigments	Riboflavin, FMN, FAD	Riboflavin, FMN and FAD metabolism in plants	FIG000859: hypothetical protein YebC	fig|28198.16.peg.359	yes	fig|367737.4.peg.1420	yes
A and B	Cofactors, Vitamins, Prosthetic Groups, Pigments	Riboflavin, FMN, FAD	Riboflavin, FMN and FAD metabolism in plants	FMN adenylyltransferase (EC 2.7.7.2)	fig|28198.16.peg.217	yes	fig|367737.4.peg.1804	yes
A and B	Cofactors, Vitamins, Prosthetic Groups, Pigments	Riboflavin, FMN, FAD	Riboflavin, FMN and FAD metabolism in plants	GTP cyclohydrolase II (EC 3.5.4.25)	fig|28198.16.peg.142,fig|28198.16.peg.1302	yes	fig|367737.4.peg.1213,fig|367737.4.peg.1219	yes
A and B	Cofactors, Vitamins, Prosthetic Groups, Pigments	Riboflavin, FMN, FAD	Riboflavin, FMN and FAD metabolism in plants	Riboflavin kinase (EC 2.7.1.26)	fig|28198.16.peg.217	yes	fig|367737.4.peg.1804	yes
A and B	Cofactors, Vitamins, Prosthetic Groups, Pigments	Riboflavin, FMN, FAD	Riboflavin, FMN and FAD metabolism in plants	Riboflavin synthase eubacterial/eukaryotic (EC 2.5.1.9)	fig|28198.16.peg.1039	yes	fig|367737.4.peg.2152	yes
A and B	Cofactors, Vitamins, Prosthetic Groups, Pigments	Riboflavin, FMN, FAD	Riboflavin, FMN and FAD metabolism in plants	tRNA pseudouridine synthase B (EC 4.2.1.70)	fig|28198.16.peg.846	yes	fig|367737.4.peg.2028	yes
B	Cofactors, Vitamins, Prosthetic Groups, Pigments	Riboflavin, FMN, FAD	Flavodoxin	Flavodoxin 1		no	fig|367737.4.peg.1743	yes
B	Cofactors, Vitamins, Prosthetic Groups, Pigments	Riboflavin, FMN, FAD	Riboflavin, FMN and FAD metabolism in plants	tRNA (5-methylaminomethyl-2-thiouridylate)-methyltransferase (EC 2.1.1.61)		no	fig|367737.4.peg.478	yes
A and B	Cofactors, Vitamins, Prosthetic Groups, Pigments	Tetrapyrroles	Heme and Siroheme Biosynthesis	Coproporphyrinogen III oxidase, oxygen-independent (EC 1.3.99.22)	fig|28198.16.peg.47	yes	fig|367737.4.peg.1227	yes
A and B	Cofactors, Vitamins, Prosthetic Groups, Pigments	Tetrapyrroles	Heme and Siroheme Biosynthesis	Ferrochelatase, protoheme ferro-lyase (EC 4.99.1.1)	fig|28198.16.peg.544,fig|28198.16.peg.1285	yes	fig|367737.4.peg.537	yes
A and B	Cofactors, Vitamins, Prosthetic Groups, Pigments	Tetrapyrroles	Heme and Siroheme Biosynthesis	Glutamate-1-semialdehyde aminotransferase (EC 5.4.3.8)	fig|28198.16.peg.387	yes	fig|367737.4.peg.992	yes
A and B	Cofactors, Vitamins, Prosthetic Groups, Pigments	Tetrapyrroles	Heme and Siroheme Biosynthesis	Glutamyl-tRNA reductase (EC 1.2.1.70)	fig|28198.16.peg.1346,fig|28198.16.peg.1347	yes	fig|367737.4.peg.380	yes
A and B	Cofactors, Vitamins, Prosthetic Groups, Pigments	Tetrapyrroles	Heme and Siroheme Biosynthesis	Glutamyl-tRNA synthetase (EC 6.1.1.17)	fig|28198.16.peg.629	yes	fig|367737.4.peg.58	yes
A and B	Cofactors, Vitamins, Prosthetic Groups, Pigments	Tetrapyrroles	Heme and Siroheme Biosynthesis	Porphobilinogen deaminase (EC 2.5.1.61)	fig|28198.16.peg.1139	yes	fig|367737.4.peg.276	yes
A and B	Cofactors, Vitamins, Prosthetic Groups, Pigments	Tetrapyrroles	Heme and Siroheme Biosynthesis	Protoporphyrinogen IX oxidase, novel form, HemJ (EC 1.3.-.-)	fig|28198.16.peg.644,fig|28198.16.peg.645	yes	fig|367737.4.peg.48	yes
A and B	Cofactors, Vitamins, Prosthetic Groups, Pigments	Tetrapyrroles	Heme and Siroheme Biosynthesis	Uroporphyrinogen III decarboxylase (EC 4.1.1.37)	fig|28198.16.peg.1588	yes	fig|367737.4.peg.1754	yes
A and B	Cofactors, Vitamins, Prosthetic Groups, Pigments	Tetrapyrroles	Heme and Siroheme Biosynthesis	Uroporphyrinogen-III methyltransferase (EC 2.1.1.107)	fig|28198.16.peg.537	yes	fig|367737.4.peg.358	yes
A and B	Cofactors, Vitamins, Prosthetic Groups, Pigments	Tetrapyrroles	Heme and Siroheme Biosynthesis	Uroporphyrinogen-III synthase (EC 4.2.1.75)	fig|28198.16.peg.2	yes	fig|367737.4.peg.1164	yes
A	Cofactors, Vitamins, Prosthetic Groups, Pigments	Tetrapyrroles	Heme and Siroheme Biosynthesis	Hypothetical radical SAM family enzyme in heat shock gene cluster, similarity with CPO of BS HemN-type	fig|28198.16.peg.36	yes		no
A	Cofactors, Vitamins, Prosthetic Groups, Pigments	Tetrapyrroles	Heme and Siroheme Biosynthesis	Precorrin-2 oxidase (EC 1.3.1.76)	fig|28198.16.peg.539	yes		no
A	Cofactors, Vitamins, Prosthetic Groups, Pigments	Tetrapyrroles	Heme biosynthesis orphans	Heme biosynthesis protein related to NirD and NirG	fig|28198.16.peg.540,fig|28198.16.peg.541	yes		no
A	Cofactors, Vitamins, Prosthetic Groups, Pigments	Tetrapyrroles	Heme biosynthesis orphans	Heme biosynthesis protein related to NirL and NirH	fig|28198.16.peg.540,fig|28198.16.peg.541	yes		no
A	Cofactors, Vitamins, Prosthetic Groups, Pigments	no subcategory	Thiamin biosynthesis	Hydroxymethylpyrimidine ABC transporter, transmembrane component	fig|28198.16.peg.518,fig|28198.16.peg.519,fig|28198.16.peg.520,fig|28198.16.peg.1599	yes		no
A and B	DNA Metabolism	DNA recombination	RuvABC plus a hypothetical	Crossover junction endodeoxyribonuclease RuvC (EC 3.1.22.4)	fig|28198.16.peg.566	yes	fig|367737.4.peg.2272	yes
A and B	DNA Metabolism	DNA recombination	RuvABC plus a hypothetical	Holliday junction DNA helicase RuvA	fig|28198.16.peg.1151	yes	fig|367737.4.peg.732	yes
A and B	DNA Metabolism	DNA recombination	RuvABC plus a hypothetical	Holliday junction DNA helicase RuvB	fig|28198.16.peg.997	yes	fig|367737.4.peg.1750	yes
A and B	DNA Metabolism	DNA repair	2-phosphoglycolate salvage	Phosphoglycolate phosphatase (EC 3.1.3.18)	fig|28198.16.peg.1745	yes	fig|367737.4.peg.2093,fig|367737.4.peg.97	yes
A and B	DNA Metabolism	DNA repair	DNA repair, UvrABC system	Excinuclease ABC subunit A	fig|28198.16.peg.1293	yes	fig|367737.4.peg.944	yes
A and B	DNA Metabolism	DNA repair	DNA repair, UvrABC system	Excinuclease ABC subunit B	fig|28198.16.peg.716	yes	fig|367737.4.peg.608	yes
A and B	DNA Metabolism	DNA repair	DNA repair, UvrABC system	Excinuclease ABC subunit C	fig|28198.16.peg.1319,fig|28198.16.peg.1320	yes	fig|367737.4.peg.775	yes
A and B	DNA Metabolism	DNA repair	DNA repair, bacterial	ADA regulatory protein	fig|28198.16.peg.1779	yes	fig|367737.4.peg.1438,fig|367737.4.peg.1737	yes
A and B	DNA Metabolism	DNA repair	DNA repair, bacterial	DNA polymerase IV (EC 2.7.7.7)	fig|28198.16.peg.861	yes	fig|367737.4.peg.1468	yes
A and B	DNA Metabolism	DNA repair	DNA repair, bacterial	DNA recombination protein RmuC	fig|28198.16.peg.25,fig|28198.16.peg.26	yes	fig|367737.4.peg.1323,fig|367737.4.peg.519	yes
A and B	DNA Metabolism	DNA repair	DNA repair, bacterial	DNA repair protein RadA	fig|28198.16.peg.1545	yes	fig|367737.4.peg.868	yes
A and B	DNA Metabolism	DNA repair	DNA repair, bacterial	DNA repair protein RecN	fig|28198.16.peg.599	yes	fig|367737.4.peg.1934	yes
A and B	DNA Metabolism	DNA repair	DNA repair, bacterial	Endonuclease IV (EC 3.1.21.2)	fig|28198.16.peg.1334	yes	fig|367737.4.peg.2162	yes
A and B	DNA Metabolism	DNA repair	DNA repair, bacterial	Exodeoxyribonuclease VII large subunit (EC 3.1.11.6)	fig|28198.16.peg.1071	yes	fig|367737.4.peg.417	yes
A and B	DNA Metabolism	DNA repair	DNA repair, bacterial	Exodeoxyribonuclease VII small subunit (EC 3.1.11.6)	fig|28198.16.peg.509	yes	fig|367737.4.peg.1353	yes
A and B	DNA Metabolism	DNA repair	DNA repair, bacterial	Methylated-DNA--protein-cysteine methyltransferase (EC 2.1.1.63)	fig|28198.16.peg.346,fig|28198.16.peg.1779	yes	fig|367737.4.peg.1438,fig|367737.4.peg.1737	yes
A and B	DNA Metabolism	DNA repair	DNA repair, bacterial	RecA protein	fig|28198.16.peg.1560,fig|28198.16.peg.1791	yes	fig|367737.4.peg.2182	yes
A and B	DNA Metabolism	DNA repair	DNA repair, bacterial	Single-stranded DNA-binding protein	fig|28198.16.peg.247	yes	fig|367737.4.peg.234	yes
A and B	DNA Metabolism	DNA repair	DNA repair, bacterial RecBCD pathway	RecD-like DNA helicase YrrC	fig|28198.16.peg.859	yes	fig|367737.4.peg.1360	yes
A and B	DNA Metabolism	DNA repair	DNA repair, bacterial UvrD and related helicases	ATP-dependent DNA helicase UvrD/PcrA/Rep, epsilon proteobacterial type 1	fig|28198.16.peg.365	yes	fig|367737.4.peg.550	yes
A and B	DNA Metabolism	DNA repair	DNA repair, bacterial UvrD and related helicases	ATP-dependent DNA helicase UvrD/PcrA/Rep, epsilon proteobacterial type 2	fig|28198.16.peg.845,fig|28198.16.peg.1883	yes	fig|367737.4.peg.2029	yes
A and B	DNA Metabolism	DNA repair	DNA repair, bacterial photolyase	Deoxyribodipyrimidine photolyase (EC 4.1.99.3)	fig|28198.16.peg.1290	yes	fig|367737.4.peg.822	yes
A and B	DNA Metabolism	DNA repair	Uracil-DNA glycosylase	Domain often clustered or fused with uracil-DNA glycosylase	fig|28198.16.peg.1051,fig|28198.16.peg.1052	yes	fig|367737.4.peg.815	yes
A and B	DNA Metabolism	DNA repair	Uracil-DNA glycosylase	Uracil-DNA glycosylase, family 1	fig|28198.16.peg.892	yes	fig|367737.4.peg.2087	yes
A	DNA Metabolism	DNA repair	DNA repair, bacterial	DNA-damage-inducible protein J	fig|28198.16.peg.1531	yes		no
A	DNA Metabolism	DNA repair	DNA repair, bacterial	Exonuclease SbcC	fig|28198.16.peg.165,fig|28198.16.peg.1770,fig|28198.16.peg.1957	yes		no
A	DNA Metabolism	DNA repair	DNA repair, bacterial	Exonuclease SbcD	fig|28198.16.peg.1768,fig|28198.16.peg.1769	yes		no
A	DNA Metabolism	DNA repair	Uracil-DNA glycosylase	Uracil-DNA glycosylase, family 4	fig|28198.16.peg.692	yes		no
B	DNA Metabolism	DNA repair	DNA repair, bacterial	Exodeoxyribonuclease III (EC 3.1.11.2)		no	fig|367737.4.peg.809	yes
A and B	DNA Metabolism	DNA replication	DNA topoisomerases, Type I, ATP-independent	DNA topoisomerase I (EC 5.99.1.2)	fig|28198.16.peg.1857	yes	fig|367737.4.peg.2176	yes
A and B	DNA Metabolism	DNA replication	DNA topoisomerases, Type II, ATP-dependent	DNA gyrase subunit A (EC 5.99.1.3)	fig|28198.16.peg.1203,fig|28198.16.peg.1704,fig|28198.16.peg.1968	yes	fig|367737.4.peg.1757	yes
A and B	DNA Metabolism	DNA replication	DNA topoisomerases, Type II, ATP-dependent	DNA gyrase subunit B (EC 5.99.1.3)	fig|28198.16.peg.563,fig|28198.16.peg.1891	yes	fig|367737.4.peg.3	yes
A and B	DNA Metabolism	DNA uptake, competence	DNA processing cluster	DNA polymerase III subunits gamma and tau (EC 2.7.7.7)	fig|28198.16.peg.1136,fig|28198.16.peg.1137	yes	fig|367737.4.peg.278	yes
A and B	DNA Metabolism	DNA uptake, competence	DNA processing cluster	Recombination protein RecR	fig|28198.16.peg.189	yes	fig|367737.4.peg.1274	yes
A	DNA Metabolism	DNA uptake, competence	DNA processing cluster	FIG000557: hypothetical protein co-occurring with RecR	fig|28198.16.peg.1067	yes		no
A and B	DNA Metabolism	no subcategory	DNA ligases	DNA ligase (ATP) (EC 6.5.1.1)	fig|28198.16.peg.237	yes	fig|367737.4.peg.684	yes
A and B	DNA Metabolism	no subcategory	DNA structural proteins, bacterial	DNA-binding protein HU	fig|28198.16.peg.160	yes	fig|367737.4.peg.1302	yes
A and B	DNA Metabolism	no subcategory	YcfH	Putative deoxyribonuclease YcfH	fig|28198.16.peg.603	yes	fig|367737.4.peg.960	yes
A	DNA Metabolism	no subcategory	Restriction-Modification System	Putative DNA-binding protein in cluster with Type I restriction-modification system	fig|28198.16.peg.455,fig|28198.16.peg.1350,fig|28198.16.peg.1671	yes		no
A	DNA Metabolism	no subcategory	Restriction-Modification System	Type I restriction-modification system, DNA-methyltransferase subunit M (EC 2.1.1.72)	fig|28198.16.peg.1760,fig|28198.16.peg.1966,fig|28198.16.peg.1967	yes		no
A	DNA Metabolism	no subcategory	Restriction-Modification System	Type I restriction-modification system, restriction subunit R (EC 3.1.21.3)	fig|28198.16.peg.1755,fig|28198.16.peg.1761	yes		no
A and B	Dormancy and Sporulation	no subcategory	Sporulation-associated proteins with broader functions	Peptidyl-tRNA hydrolase (EC 3.1.1.29)	fig|28198.16.peg.589	yes	fig|367737.4.peg.626	yes
A	Dormancy and Sporulation	no subcategory	Persister Cells	Cell division inhibitor	fig|28198.16.peg.472,fig|28198.16.peg.1288,fig|28198.16.peg.1289	yes		no
A	Fatty Acids, Lipids, and Isoprenoids	Fatty acids	Fatty Acid Biosynthesis FASII	Enoyl-[acyl-carrier-protein] reductase [FMN] (EC 1.3.1.9)	fig|28198.16.peg.593,fig|28198.16.peg.1926	yes		no
A and B	Fatty Acids, Lipids, and Isoprenoids	Isoprenoids	Isoprenoid Biosynthesis	1-deoxy-D-xylulose 5-phosphate reductoisomerase (EC 1.1.1.267)	fig|28198.16.peg.751	yes	fig|367737.4.peg.160	yes
A and B	Fatty Acids, Lipids, and Isoprenoids	Isoprenoids	Isoprenoid Biosynthesis	1-deoxy-D-xylulose 5-phosphate synthase (EC 2.2.1.7)	fig|28198.16.peg.1472	yes	fig|367737.4.peg.2079	yes
A and B	Fatty Acids, Lipids, and Isoprenoids	Isoprenoids	Isoprenoid Biosynthesis	1-hydroxy-2-methyl-2-(E)-butenyl 4-diphosphate synthase (EC 1.17.7.1)	fig|28198.16.peg.967,fig|28198.16.peg.968	yes	fig|367737.4.peg.643	yes
A and B	Fatty Acids, Lipids, and Isoprenoids	Isoprenoids	Isoprenoid Biosynthesis	2-C-methyl-D-erythritol 2,4-cyclodiphosphate synthase (EC 4.6.1.12)	fig|28198.16.peg.734	yes	fig|367737.4.peg.126	yes
A and B	Fatty Acids, Lipids, and Isoprenoids	Isoprenoids	Isoprenoid Biosynthesis	2-C-methyl-D-erythritol 4-phosphate cytidylyltransferase (EC 2.7.7.60)	fig|28198.16.peg.734	yes	fig|367737.4.peg.126	yes
A and B	Fatty Acids, Lipids, and Isoprenoids	Isoprenoids	Isoprenoid Biosynthesis	4-diphosphocytidyl-2-C-methyl-D-erythritol kinase (EC 2.7.1.148)	fig|28198.16.peg.847	yes	fig|367737.4.peg.2027	yes
A and B	Fatty Acids, Lipids, and Isoprenoids	Isoprenoids	Isoprenoid Biosynthesis	Dimethylallyltransferase (EC 2.5.1.1)	fig|28198.16.peg.1066,fig|28198.16.peg.1348	yes	fig|367737.4.peg.379,fig|367737.4.peg.422	yes
A and B	Fatty Acids, Lipids, and Isoprenoids	Isoprenoids	Isoprenoid Biosynthesis	Undecaprenyl diphosphate synthase (EC 2.5.1.31)	fig|28198.16.peg.979	yes	fig|367737.4.peg.2142	yes
A and B	Fatty Acids, Lipids, and Isoprenoids	Isoprenoids	Isoprenoinds for Quinones	Dimethylallyltransferase (EC 2.5.1.1)	fig|28198.16.peg.1066,fig|28198.16.peg.1348	yes	fig|367737.4.peg.379,fig|367737.4.peg.422	yes
A and B	Fatty Acids, Lipids, and Isoprenoids	Isoprenoids	Isoprenoinds for Quinones	Geranylgeranyl diphosphate synthase (EC 2.5.1.29)	fig|28198.16.peg.1066	yes	fig|367737.4.peg.379,fig|367737.4.peg.422	yes
A and B	Fatty Acids, Lipids, and Isoprenoids	Isoprenoids	Isoprenoinds for Quinones	Octaprenyl diphosphate synthase (EC 2.5.1.90)	fig|28198.16.peg.1066,fig|28198.16.peg.1348	yes	fig|367737.4.peg.379,fig|367737.4.peg.422	yes
A and B	Fatty Acids, Lipids, and Isoprenoids	Isoprenoids	Isoprenoinds for Quinones	Undecaprenyl diphosphate synthase (EC 2.5.1.31)	fig|28198.16.peg.979	yes	fig|367737.4.peg.2142	yes
A and B	Fatty Acids, Lipids, and Isoprenoids	Isoprenoids	Nonmevalonate Branch of Isoprenoid Biosynthesis	1-deoxy-D-xylulose 5-phosphate reductoisomerase (EC 1.1.1.267)	fig|28198.16.peg.751	yes	fig|367737.4.peg.160	yes
A and B	Fatty Acids, Lipids, and Isoprenoids	Isoprenoids	Nonmevalonate Branch of Isoprenoid Biosynthesis	1-deoxy-D-xylulose 5-phosphate synthase (EC 2.2.1.7)	fig|28198.16.peg.1472	yes	fig|367737.4.peg.2079	yes
A and B	Fatty Acids, Lipids, and Isoprenoids	Isoprenoids	Nonmevalonate Branch of Isoprenoid Biosynthesis	1-hydroxy-2-methyl-2-(E)-butenyl 4-diphosphate synthase (EC 1.17.7.1)	fig|28198.16.peg.967,fig|28198.16.peg.968	yes	fig|367737.4.peg.643	yes
A and B	Fatty Acids, Lipids, and Isoprenoids	Isoprenoids	Nonmevalonate Branch of Isoprenoid Biosynthesis	2-C-methyl-D-erythritol 2,4-cyclodiphosphate synthase (EC 4.6.1.12)	fig|28198.16.peg.734	yes	fig|367737.4.peg.126	yes
A and B	Fatty Acids, Lipids, and Isoprenoids	Isoprenoids	Nonmevalonate Branch of Isoprenoid Biosynthesis	2-C-methyl-D-erythritol 4-phosphate cytidylyltransferase (EC 2.7.7.60)	fig|28198.16.peg.734	yes	fig|367737.4.peg.126	yes
A and B	Fatty Acids, Lipids, and Isoprenoids	Isoprenoids	Nonmevalonate Branch of Isoprenoid Biosynthesis	4-diphosphocytidyl-2-C-methyl-D-erythritol kinase (EC 2.7.1.148)	fig|28198.16.peg.847	yes	fig|367737.4.peg.2027	yes
A and B	Fatty Acids, Lipids, and Isoprenoids	Isoprenoids	Polyprenyl Diphosphate Biosynthesis	Geranylgeranyl diphosphate synthase (EC 2.5.1.29)	fig|28198.16.peg.1066	yes	fig|367737.4.peg.379,fig|367737.4.peg.422	yes
A and B	Fatty Acids, Lipids, and Isoprenoids	Isoprenoids	Polyprenyl Diphosphate Biosynthesis	Octaprenyl diphosphate synthase (EC 2.5.1.90)	fig|28198.16.peg.1066,fig|28198.16.peg.1348	yes	fig|367737.4.peg.379,fig|367737.4.peg.422	yes
A and B	Fatty Acids, Lipids, and Isoprenoids	Isoprenoids	Polyprenyl Diphosphate Biosynthesis	Undecaprenyl diphosphate synthase (EC 2.5.1.31)	fig|28198.16.peg.979	yes	fig|367737.4.peg.2142	yes
A	Fatty Acids, Lipids, and Isoprenoids	Isoprenoids	Isoprenoid Biosynthesis	(2E,6E)-farnesyl diphosphate synthase (EC 2.5.1.10)	fig|28198.16.peg.1066	yes		no
B	Fatty Acids, Lipids, and Isoprenoids	Isoprenoids	Isoprenoid Biosynthesis	4-hydroxy-3-methylbut-2-enyl diphosphate reductase (EC 1.17.1.2)		no	fig|367737.4.peg.1995	yes
A and B	Fatty Acids, Lipids, and Isoprenoids	Phospholipids	Glycerolipid and Glycerophospholipid Metabolism in Bacteria	1-acyl-sn-glycerol-3-phosphate acyltransferase (EC 2.3.1.51)	fig|28198.16.peg.482	yes	fig|367737.4.peg.184,fig|367737.4.peg.2065	yes
A and B	Fatty Acids, Lipids, and Isoprenoids	Phospholipids	Glycerolipid and Glycerophospholipid Metabolism in Bacteria	Acyl carrier protein	fig|28198.16.peg.885	yes	fig|367737.4.peg.2002	yes
A and B	Fatty Acids, Lipids, and Isoprenoids	Phospholipids	Glycerolipid and Glycerophospholipid Metabolism in Bacteria	Acyl-phosphate:glycerol-3-phosphate O-acyltransferase PlsY	fig|28198.16.peg.253	yes	fig|367737.4.peg.1979	yes
A and B	Fatty Acids, Lipids, and Isoprenoids	Phospholipids	Glycerolipid and Glycerophospholipid Metabolism in Bacteria	Aldehyde dehydrogenase (EC 1.2.1.3)	fig|28198.16.peg.1055	yes	fig|367737.4.peg.371	yes
A and B	Fatty Acids, Lipids, and Isoprenoids	Phospholipids	Glycerolipid and Glycerophospholipid Metabolism in Bacteria	CDP-diacylglycerol--glycerol-3-phosphate 3-phosphatidyltransferase (EC 2.7.8.5)	fig|28198.16.peg.1271	yes	fig|367737.4.peg.182,fig|367737.4.peg.856	yes
A and B	Fatty Acids, Lipids, and Isoprenoids	Phospholipids	Glycerolipid and Glycerophospholipid Metabolism in Bacteria	CDP-diacylglycerol--serine O-phosphatidyltransferase (EC 2.7.8.8)	fig|28198.16.peg.16	yes	fig|367737.4.peg.1141	yes
A and B	Fatty Acids, Lipids, and Isoprenoids	Phospholipids	Glycerolipid and Glycerophospholipid Metabolism in Bacteria	Diacylglycerol kinase (EC 2.7.1.107)	fig|28198.16.peg.1572	yes	fig|367737.4.peg.1788	yes
A and B	Fatty Acids, Lipids, and Isoprenoids	Phospholipids	Glycerolipid and Glycerophospholipid Metabolism in Bacteria	Glycerol-3-phosphate dehydrogenase [NAD(P)+] (EC 1.1.1.94)	fig|28198.16.peg.1741	yes	fig|367737.4.peg.29	yes
A and B	Fatty Acids, Lipids, and Isoprenoids	Phospholipids	Glycerolipid and Glycerophospholipid Metabolism in Bacteria	Phosphate:acyl-ACP acyltransferase PlsX	fig|28198.16.peg.410	yes	fig|367737.4.peg.287	yes
A and B	Fatty Acids, Lipids, and Isoprenoids	Phospholipids	Glycerolipid and Glycerophospholipid Metabolism in Bacteria	Phosphatidate cytidylyltransferase (EC 2.7.7.41)	fig|28198.16.peg.752	yes	fig|367737.4.peg.159,fig|367737.4.peg.183	yes
A and B	Fatty Acids, Lipids, and Isoprenoids	Phospholipids	Glycerolipid and Glycerophospholipid Metabolism in Bacteria	Phosphatidylglycerophosphatase A (EC 3.1.3.27)	fig|28198.16.peg.736	yes	fig|367737.4.peg.128	yes
A and B	Fatty Acids, Lipids, and Isoprenoids	Phospholipids	Glycerolipid and Glycerophospholipid Metabolism in Bacteria	Phosphatidylserine decarboxylase (EC 4.1.1.65)	fig|28198.16.peg.1254,fig|28198.16.peg.1255,fig|28198.16.peg.1960	yes	fig|367737.4.peg.2132	yes
B	Fatty Acids, Lipids, and Isoprenoids	Triacylglycerols	Triacylglycerol metabolism	Phospholipase A1 precursor (EC 3.1.1.32, EC 3.1.1.4)		no	fig|367737.4.peg.845	yes
B	Iron acquisition and metabolism	Siderophores	Iron siderophore sensor & receptor system	FIG006045: Sigma factor, ECF subfamily		no	fig|367737.4.peg.1026,fig|367737.4.peg.1408,fig|367737.4.peg.1429,fig|367737.4.peg.1541,fig|367737.4.peg.2105,fig|367737.4.peg.2253,fig|367737.4.peg.969	yes
B	Iron acquisition and metabolism	Siderophores	Iron siderophore sensor & receptor system	Iron siderophore receptor protein		no	fig|367737.4.peg.1431,fig|367737.4.peg.1537,fig|367737.4.peg.1548,fig|367737.4.peg.2103,fig|367737.4.peg.2251,fig|367737.4.peg.971	yes
B	Iron acquisition and metabolism	Siderophores	Iron siderophore sensor & receptor system	Iron siderophore sensor protein		no	fig|367737.4.peg.1027,fig|367737.4.peg.1407,fig|367737.4.peg.1430,fig|367737.4.peg.1540,fig|367737.4.peg.2104,fig|367737.4.peg.2252,fig|367737.4.peg.970	yes
A	Membrane Transport	ABC transporters	ABC transporter alkylphosphonate (TC 3.A.1.9.1)	Phosphonate ABC transporter phosphate-binding periplasmic component (TC 3.A.1.9.1)	fig|28198.16.peg.1580	yes		no
A	Membrane Transport	ABC transporters	ABC transporter dipeptide (TC 3.A.1.5.2)	Dipeptide transport system permease protein DppC (TC 3.A.1.5.2)	fig|28198.16.peg.1007	yes		no
A	Membrane Transport	ABC transporters	ABC transporter oligopeptide (TC 3.A.1.5.1)	Oligopeptide ABC transporter, periplasmic oligopeptide-binding protein OppA (TC 3.A.1.5.1)	fig|28198.16.peg.866	yes		no
A	Membrane Transport	ABC transporters	ABC transporter tungstate (TC 3.A.1.6.2)	ABC-type tungstate transport system, ATP-binding protein	fig|28198.16.peg.698	yes		no
A	Membrane Transport	ABC transporters	ABC transporter tungstate (TC 3.A.1.6.2)	ABC-type tungstate transport system, periplasmic binding protein	fig|28198.16.peg.700	yes		no
A	Membrane Transport	ABC transporters	ABC transporter tungstate (TC 3.A.1.6.2)	ABC-type tungstate transport system, permease protein	fig|28198.16.peg.699	yes		no
A	Membrane Transport	ABC transporters	ATP-dependent efflux pump transporter Ybh	ABC transport system, permease component YbhR	fig|28198.16.peg.174	yes		no
A	Membrane Transport	ABC transporters	ATP-dependent efflux pump transporter Ybh	ABC transport system, permease component YbhS	fig|28198.16.peg.173,fig|28198.16.peg.1907	yes		no
A	Membrane Transport	ABC transporters	ATP-dependent efflux pump transporter Ybh	ABC transporter multidrug efflux pump, fused ATP-binding domains	fig|28198.16.peg.172	yes		no
A and B	Membrane Transport	Cation transporters	Copper Transport System	Copper-translocating P-type ATPase (EC 3.6.3.4)	fig|28198.16.peg.1612,fig|28198.16.peg.1809	yes	fig|367737.4.peg.473,fig|367737.4.peg.533	yes
A and B	Membrane Transport	Cation transporters	Magnesium transport	Magnesium and cobalt transport protein CorA	fig|28198.16.peg.896,fig|28198.16.peg.1459	yes	fig|367737.4.peg.1616,fig|367737.4.peg.2218	yes
A and B	Membrane Transport	Protein translocation across cytoplasmic membrane	Bacterial signal recognition particle (SRP)	Signal recognition particle receptor protein FtsY (=alpha subunit) (TC 3.A.5.1.1)	fig|28198.16.peg.1418	yes	fig|367737.4.peg.873	yes
A and B	Membrane Transport	Protein translocation across cytoplasmic membrane	Bacterial signal recognition particle (SRP)	Signal recognition particle, subunit Ffh SRP54 (TC 3.A.5.1.1)	fig|28198.16.peg.656	yes	fig|367737.4.peg.1923	yes
A and B	Membrane Transport	Protein translocation across cytoplasmic membrane	Twin-arginine translocation system	Twin-arginine translocation protein TatA	fig|28198.16.peg.479,fig|28198.16.peg.480	yes	fig|367737.4.peg.2067,fig|367737.4.peg.2068	yes
A and B	Membrane Transport	Protein translocation across cytoplasmic membrane	Twin-arginine translocation system	Twin-arginine translocation protein TatB	fig|28198.16.peg.184	yes	fig|367737.4.peg.1236	yes
A and B	Membrane Transport	Protein translocation across cytoplasmic membrane	Twin-arginine translocation system	Twin-arginine translocation protein TatC	fig|28198.16.peg.183	yes	fig|367737.4.peg.1237	yes
A	Membrane Transport	TRAP transporters	TRAP Transporter collection	TRAP-type C4-dicarboxylate transport system, large permease component	fig|28198.16.peg.523	yes		no
A and B	Membrane Transport	Uni- Sym- and Antiporters	NhaA, NhaD and Sodium-dependent phosphate transporters	Sodium-dependent phosphate transporter	fig|28198.16.peg.956	yes	fig|367737.4.peg.1068	yes
A	Membrane Transport	Uni- Sym- and Antiporters	Multi-subunit cation antiporter	Na(+) H(+) antiporter subunit A	fig|28198.16.peg.229	yes		no
A	Membrane Transport	Uni- Sym- and Antiporters	Multi-subunit cation antiporter	Na(+) H(+) antiporter subunit B	fig|28198.16.peg.229	yes		no
A	Membrane Transport	Uni- Sym- and Antiporters	Multi-subunit cation antiporter	Na(+) H(+) antiporter subunit C	fig|28198.16.peg.228	yes		no
A	Membrane Transport	Uni- Sym- and Antiporters	Multi-subunit cation antiporter	Na(+) H(+) antiporter subunit D	fig|28198.16.peg.227	yes		no
A	Membrane Transport	Uni- Sym- and Antiporters	Multi-subunit cation antiporter	Na(+) H(+) antiporter subunit E	fig|28198.16.peg.226	yes		no
A	Membrane Transport	Uni- Sym- and Antiporters	Multi-subunit cation antiporter	Na(+) H(+) antiporter subunit F	fig|28198.16.peg.225	yes		no
A	Membrane Transport	Uni- Sym- and Antiporters	Multi-subunit cation antiporter	Na(+) H(+) antiporter subunit G	fig|28198.16.peg.224	yes		no
B	Membrane Transport	Uni- Sym- and Antiporters	NhaA, NhaD and Sodium-dependent phosphate transporters	Na+/H+ antiporter NhaA type		no	fig|367737.4.peg.1352,fig|367737.4.peg.1714	yes
A and B	Membrane Transport	no subcategory	Ton and Tol transport systems	4-hydroxybenzoyl-CoA thioesterase family active site	fig|28198.16.peg.29	yes	fig|367737.4.peg.516	yes
A and B	Membrane Transport	no subcategory	Ton and Tol transport systems	Biopolymer transport protein ExbD/TolR	fig|28198.16.peg.329,fig|28198.16.peg.1213	yes	fig|367737.4.peg.1565,fig|367737.4.peg.373,fig|367737.4.peg.690	yes
A and B	Membrane Transport	no subcategory	Ton and Tol transport systems	Ferric siderophore transport system, biopolymer transport protein ExbB	fig|28198.16.peg.1212	yes	fig|367737.4.peg.691	yes
A and B	Membrane Transport	no subcategory	Ton and Tol transport systems	Ferric siderophore transport system, periplasmic binding protein TonB	fig|28198.16.peg.388,fig|28198.16.peg.1214	yes	fig|367737.4.peg.991	yes
A and B	Membrane Transport	no subcategory	Ton and Tol transport systems	MotA/TolQ/ExbB proton channel family protein	fig|28198.16.peg.328	yes	fig|367737.4.peg.1566,fig|367737.4.peg.374	yes
A and B	Membrane Transport	no subcategory	Ton and Tol transport systems	Outer membrane lipoprotein omp16 precursor	fig|28198.16.peg.332	yes	fig|367737.4.peg.1562	yes
A and B	Membrane Transport	no subcategory	Ton and Tol transport systems	TPR repeat containing exported protein	fig|28198.16.peg.333	yes	fig|367737.4.peg.1561	yes
A and B	Membrane Transport	no subcategory	Ton and Tol transport systems	TonB-dependent receptor	fig|28198.16.peg.1834	yes	fig|367737.4.peg.1941,fig|367737.4.peg.612,fig|367737.4.peg.714	yes
A and B	Membrane Transport	no subcategory	Ton and Tol transport systems	Type I secretion outer membrane protein, TolC precursor	fig|28198.16.peg.1211	yes	fig|367737.4.peg.692	yes
A and B	Membrane Transport	no subcategory	Ton and Tol transport systems	putative TolA function	fig|28198.16.peg.330	yes	fig|367737.4.peg.1564	yes
A and B	Membrane Transport	no subcategory	Ton and Tol transport systems	tolB protein precursor, periplasmic protein involved in the tonb-independent uptake of group A colicins	fig|28198.16.peg.331	yes	fig|367737.4.peg.1563	yes
A	Membrane Transport	no subcategory	ECF class transporters	ATPase component NikO of energizing module of nickel ECF transporter	fig|28198.16.peg.1490	yes		no
A	Membrane Transport	no subcategory	ECF class transporters	Substrate-specific component NikM of nickel ECF transporter	fig|28198.16.peg.1493	yes		no
A	Membrane Transport	no subcategory	ECF class transporters	Transmembrane component NikQ of energizing module of nickel ECF transporter	fig|28198.16.peg.1491	yes		no
B	Membrane Transport	no subcategory	Ton and Tol transport systems	Outer membrane receptor for ferric coprogen and ferric-rhodotorulic acid		no	fig|367737.4.peg.1827	yes
B	Membrane Transport	no subcategory	Ton and Tol transport systems	Putative OMR family iron-siderophore receptor precursor		no	fig|367737.4.peg.1355,fig|367737.4.peg.1452	yes
B	Membrane Transport	no subcategory	Ton and Tol transport systems	TonB-dependent siderophore receptor		no	fig|367737.4.peg.2251	yes
A and B	Metabolism of Aromatic Compounds	Peripheral pathways for catabolism of aromatic compounds	Biphenyl Degradation	4-hydroxy-2-oxovalerate aldolase (EC 4.1.3.39)	fig|28198.16.peg.1127	yes	fig|367737.4.peg.1465	yes
A and B	Metabolism of Aromatic Compounds	Peripheral pathways for catabolism of aromatic compounds	Biphenyl Degradation	biphenyl-2,3-diol 1,2-dioxygenase III-related protein	fig|28198.16.peg.249	yes	fig|367737.4.peg.2017	yes
A and B	Metabolism of Aromatic Compounds	Peripheral pathways for catabolism of aromatic compounds	Quinate degradation	3-dehydroquinate dehydratase II (EC 4.2.1.10)	fig|28198.16.peg.1378	yes	fig|367737.4.peg.481	yes
B	Metabolism of Aromatic Compounds	Peripheral pathways for catabolism of aromatic compounds	Biphenyl Degradation	2-keto-4-pentenoate hydratase (EC 4.2.1.80)		no	fig|367737.4.peg.1606	yes
A and B	Miscellaneous	Plant-Prokaryote DOE project	Iron-sulfur cluster assembly	Cysteine desulfurase (EC 2.8.1.7)	fig|28198.16.peg.702,fig|28198.16.peg.727	yes	fig|367737.4.peg.595,fig|367737.4.peg.599	yes
A and B	Miscellaneous	Plant-Prokaryote DOE project	Iron-sulfur cluster assembly	Iron-sulfur cluster assembly ATPase protein SufC	fig|28198.16.peg.725	yes	fig|367737.4.peg.597	yes
A and B	Miscellaneous	Plant-Prokaryote DOE project	Iron-sulfur cluster assembly	Iron-sulfur cluster assembly protein SufB	fig|28198.16.peg.724	yes	fig|367737.4.peg.598	yes
A and B	Miscellaneous	Plant-Prokaryote DOE project	Iron-sulfur cluster assembly	Iron-sulfur cluster assembly scaffold protein IscU/NifU-like	fig|28198.16.peg.721,fig|28198.16.peg.722,fig|28198.16.peg.723	yes	fig|367737.4.peg.600	yes
A and B	Miscellaneous	Plant-Prokaryote DOE project	Iron-sulfur cluster assembly	PaaD-like protein (DUF59) involved in Fe-S cluster assembly	fig|28198.16.peg.729,fig|28198.16.peg.1888	yes	fig|367737.4.peg.593	yes
A and B	Miscellaneous	Plant-Prokaryote DOE project	Iron-sulfur cluster assembly	Sulfur acceptor protein SufE for iron-sulfur cluster assembly	fig|28198.16.peg.728	yes	fig|367737.4.peg.594	yes
B	Miscellaneous	Plant-Prokaryote DOE project	Iron-sulfur cluster assembly	Iron-sulfur cluster assembly protein SufD		no	fig|367737.4.peg.596	yes
B	Miscellaneous	Plant-Prokaryote DOE project	YrdC-YciO-Sua5 protein family	COG0009 YrdC subfamily, required for N6-threonylcarbamoyl adenosine t(6)A37 modification in tRNA		no	fig|367737.4.peg.1349	yes
A and B	Miscellaneous	no subcategory	Broadly distributed proteins not in subsystems	FIG001943: hypothetical protein YajQ	fig|28198.16.peg.134	yes	fig|367737.4.peg.848	yes
A and B	Miscellaneous	no subcategory	Broadly distributed proteins not in subsystems	YciL protein	fig|28198.16.peg.471	yes	fig|367737.4.peg.1842	yes
A	Miscellaneous	no subcategory	Broadly distributed proteins not in subsystems	YpfJ protein, zinc metalloprotease superfamily	fig|28198.16.peg.24	yes		no
A	Miscellaneous	no subcategory	Phosphoglycerate mutase protein family	Carboxyl-terminal protease (EC 3.4.21.102)	fig|28198.16.peg.487	yes		no
B	Miscellaneous	no subcategory	Broadly distributed proteins not in subsystems	UPF0225 protein YchJ		no	fig|367737.4.peg.1158	yes
A and B	Motility and Chemotaxis	Flagellar motility in Prokaryota	Flagellar motility	Chemotaxis regulator - transmits chemoreceptor signals to flagelllar motor components CheY	fig|28198.16.peg.662,fig|28198.16.peg.1504	yes	fig|367737.4.peg.1170,fig|367737.4.peg.1916	yes
A and B	Motility and Chemotaxis	Flagellar motility in Prokaryota	Flagellar motility	Flagellar L-ring protein FlgH	fig|28198.16.peg.572	yes	fig|367737.4.peg.200	yes
A and B	Motility and Chemotaxis	Flagellar motility in Prokaryota	Flagellar motility	Flagellar biosynthesis protein FlhA	fig|28198.16.peg.434	yes	fig|367737.4.peg.1886	yes
A and B	Motility and Chemotaxis	Flagellar motility in Prokaryota	Flagellar motility	Flagellar biosynthesis protein FlhB	fig|28198.16.peg.428,fig|28198.16.peg.1125	yes	fig|367737.4.peg.1367,fig|367737.4.peg.1890	yes
A and B	Motility and Chemotaxis	Flagellar motility in Prokaryota	Flagellar motility	Flagellar biosynthesis protein FlhF	fig|28198.16.peg.422,fig|28198.16.peg.423	yes	fig|367737.4.peg.1898	yes
A and B	Motility and Chemotaxis	Flagellar motility in Prokaryota	Flagellar motility	Flagellar biosynthesis protein FliR	fig|28198.16.peg.427	yes	fig|367737.4.peg.1891	yes
A and B	Motility and Chemotaxis	Flagellar motility in Prokaryota	Flagellar motility	Flagellar motor rotation protein MotB	fig|28198.16.peg.1449	yes	fig|367737.4.peg.391	yes
A and B	Motility and Chemotaxis	Flagellar motility in Prokaryota	Flagellar motility	Flagellar motor switch protein FliM	fig|28198.16.peg.581	yes	fig|367737.4.peg.192	yes
A and B	Motility and Chemotaxis	Flagellar motility in Prokaryota	Flagellar motility	Flagellar motor switch protein FliN	fig|28198.16.peg.418,fig|28198.16.peg.1827	yes	fig|367737.4.peg.1902,fig|367737.4.peg.1909	yes
A and B	Motility and Chemotaxis	Flagellar motility in Prokaryota	Flagellar motility	Flagellar synthesis regulator FleN	fig|28198.16.peg.424	yes	fig|367737.4.peg.1897	yes
A and B	Motility and Chemotaxis	Flagellar motility in Prokaryota	Flagellar motility	Flagellum-specific ATP synthase FliI	fig|28198.16.peg.430	yes	fig|367737.4.peg.1888	yes
A and B	Motility and Chemotaxis	Flagellar motility in Prokaryota	Flagellar motility	Rrf2 family transcriptional regulator	fig|28198.16.peg.824,fig|28198.16.peg.918	yes	fig|367737.4.peg.2240,fig|367737.4.peg.364	yes
A and B	Motility and Chemotaxis	Flagellar motility in Prokaryota	Flagellar motility	Signal transduction protein CetB, mediates an energy taxis response	fig|28198.16.peg.314,fig|28198.16.peg.1414	yes	fig|367737.4.peg.831	yes
A	Motility and Chemotaxis	Flagellar motility in Prokaryota	Flagellar motility	Flagellin	fig|28198.16.peg.1825	yes		no
B	Motility and Chemotaxis	Flagellar motility in Prokaryota	Flagellar motility	Chemotaxis protein CheV (EC 2.7.3.-)		no	fig|367737.4.peg.604	yes
B	Motility and Chemotaxis	Flagellar motility in Prokaryota	Flagellar motility	Flagellar motor rotation protein MotA		no	fig|367737.4.peg.392	yes
B	Motility and Chemotaxis	Flagellar motility in Prokaryota	Flagellar motility	Signal transduction histidine kinase CheA (EC 2.7.3.-)		no	fig|367737.4.peg.1171	yes
B	Motility and Chemotaxis	Flagellar motility in Prokaryota	Flagellum	Flagellar M-ring protein FliF		no	fig|367737.4.peg.1912	yes
B	Motility and Chemotaxis	Flagellar motility in Prokaryota	Flagellum	Flagellar assembly protein FliH		no	fig|367737.4.peg.1910	yes
B	Motility and Chemotaxis	Flagellar motility in Prokaryota	Flagellum	Flagellar basal-body rod protein FlgC		no	fig|367737.4.peg.1893	yes
B	Motility and Chemotaxis	Flagellar motility in Prokaryota	Flagellum	Flagellar biosynthesis protein FliQ		no	fig|367737.4.peg.195	yes
B	Motility and Chemotaxis	Flagellar motility in Prokaryota	Flagellum	Flagellar biosynthesis protein FliS		no	fig|367737.4.peg.203	yes
B	Motility and Chemotaxis	Flagellar motility in Prokaryota	Flagellum	Flagellar hook-length control protein FliK		no	fig|367737.4.peg.1892	yes
B	Motility and Chemotaxis	Flagellar motility in Prokaryota	Flagellum	Flagellar motor switch protein FliG		no	fig|367737.4.peg.1911	yes
A	Nitrogen Metabolism	Denitrification	Denitrification	Cytochrome cd1 nitrite reductase (EC:1.7.2.1)	fig|28198.16.peg.531	yes		no
A	Nitrogen Metabolism	Denitrification	Denitrification	Nitric-oxide reductase subunit B (EC 1.7.99.7)	fig|28198.16.peg.529	yes		no
A	Nitrogen Metabolism	Denitrification	Denitrification	Nitric-oxide reductase subunit C (EC 1.7.99.7)	fig|28198.16.peg.528	yes		no
A and B	Nitrogen Metabolism	no subcategory	Ammonia assimilation	Ammonium transporter	fig|28198.16.peg.584	yes	fig|367737.4.peg.1139	yes
A and B	Nitrogen Metabolism	no subcategory	Ammonia assimilation	Glutamate synthase [NADPH] large chain (EC 1.4.1.13)	fig|28198.16.peg.550	yes	fig|367737.4.peg.1796	yes
A and B	Nitrogen Metabolism	no subcategory	Ammonia assimilation	Glutamine synthetase type I (EC 6.3.1.2)	fig|28198.16.peg.1160,fig|28198.16.peg.1161,fig|28198.16.peg.1937	yes	fig|367737.4.peg.1858	yes
A and B	Nitrogen Metabolism	no subcategory	Ammonia assimilation	Nitrogen regulatory protein P-II	fig|28198.16.peg.583	yes	fig|367737.4.peg.1140,fig|367737.4.peg.190	yes
A	Nitrogen Metabolism	no subcategory	Dissimilatory nitrite reductase	Heme d1 biosynthesis protein NirF	fig|28198.16.peg.536	yes		no
A	Nitrogen Metabolism	no subcategory	Dissimilatory nitrite reductase	Heme d1 biosynthesis protein NirJ	fig|28198.16.peg.535	yes		no
A	Nitrogen Metabolism	no subcategory	Dissimilatory nitrite reductase	Nitrite reductase associated c-type cytochorome NirN	fig|28198.16.peg.532	yes		no
B	Nitrogen Metabolism	no subcategory	Ammonia assimilation	Glutamate synthase [NADPH] small chain (EC 1.4.1.13)		no	fig|367737.4.peg.1795	yes
B	Nitrogen Metabolism	no subcategory	Nitrate and nitrite ammonification	Cytochrome c nitrite reductase, small subunit NrfH		no	fig|367737.4.peg.341	yes
B	Nitrogen Metabolism	no subcategory	Nitrate and nitrite ammonification	Cytochrome c552 precursor (EC 1.7.2.2)		no	fig|367737.4.peg.340	yes
A and B	Nucleosides and Nucleotides	Detoxification	Nudix proteins (nucleoside triphosphate hydrolases)	Adenosine (5')-pentaphospho-(5'')-adenosine pyrophosphohydrolase (EC 3.6.1.-)	fig|28198.16.peg.37	yes	fig|367737.4.peg.1184	yes
A and B	Nucleosides and Nucleotides	Detoxification	Nudix proteins (nucleoside triphosphate hydrolases)	Uridine diphosphate glucose pyrophosphatase (EC 3.6.1.45)	fig|28198.16.peg.135	yes	fig|367737.4.peg.847	yes
A and B	Nucleosides and Nucleotides	Purines	De Novo Purine Biosynthesis	Adenylosuccinate lyase (EC 4.3.2.2)	fig|28198.16.peg.1634,fig|28198.16.peg.1635	yes	fig|367737.4.peg.19	yes
A and B	Nucleosides and Nucleotides	Purines	De Novo Purine Biosynthesis	Amidophosphoribosyltransferase (EC 2.4.2.14)	fig|28198.16.peg.842	yes	fig|367737.4.peg.2032	yes
A and B	Nucleosides and Nucleotides	Purines	De Novo Purine Biosynthesis	IMP cyclohydrolase (EC 3.5.4.10)	fig|28198.16.peg.1733,fig|28198.16.peg.1734	yes	fig|367737.4.peg.1611	yes
A and B	Nucleosides and Nucleotides	Purines	De Novo Purine Biosynthesis	Phosphoribosylamine--glycine ligase (EC 6.3.4.13)	fig|28198.16.peg.1	yes	fig|367737.4.peg.1165	yes
A and B	Nucleosides and Nucleotides	Purines	De Novo Purine Biosynthesis	Phosphoribosylaminoimidazole carboxylase catalytic subunit (EC 4.1.1.21)	fig|28198.16.peg.648	yes	fig|367737.4.peg.1930	yes
A and B	Nucleosides and Nucleotides	Purines	De Novo Purine Biosynthesis	Phosphoribosylaminoimidazole-succinocarboxamide synthase (EC 6.3.2.6)	fig|28198.16.peg.486	yes	fig|367737.4.peg.2061	yes
A and B	Nucleosides and Nucleotides	Purines	De Novo Purine Biosynthesis	Phosphoribosylaminoimidazolecarboxamide formyltransferase (EC 2.1.2.3)	fig|28198.16.peg.1733,fig|28198.16.peg.1734	yes	fig|367737.4.peg.1611	yes
A and B	Nucleosides and Nucleotides	Purines	De Novo Purine Biosynthesis	Phosphoribosylformylglycinamidine cyclo-ligase (EC 6.3.3.1)	fig|28198.16.peg.290,fig|28198.16.peg.1911,fig|28198.16.peg.1969	yes	fig|367737.4.peg.141	yes
A and B	Nucleosides and Nucleotides	Purines	De Novo Purine Biosynthesis	Phosphoribosylformylglycinamidine synthase, PurS subunit (EC 6.3.5.3)	fig|28198.16.peg.485	yes	fig|367737.4.peg.2062	yes
A and B	Nucleosides and Nucleotides	Purines	De Novo Purine Biosynthesis	Phosphoribosylformylglycinamidine synthase, glutamine amidotransferase subunit (EC 6.3.5.3)	fig|28198.16.peg.484	yes	fig|367737.4.peg.2063	yes
A and B	Nucleosides and Nucleotides	Purines	De Novo Purine Biosynthesis	Phosphoribosylformylglycinamidine synthase, synthetase subunit (EC 6.3.5.3)	fig|28198.16.peg.1732	yes	fig|367737.4.peg.1612	yes
A and B	Nucleosides and Nucleotides	Purines	De Novo Purine Biosynthesis	Phosphoribosylglycinamide formyltransferase (EC 2.1.2.2)	fig|28198.16.peg.567	yes	fig|367737.4.peg.2271	yes
A and B	Nucleosides and Nucleotides	Purines	De Novo Purine Biosynthesis	Ribose-phosphate pyrophosphokinase (EC 2.7.6.1)	fig|28198.16.peg.1616	yes	fig|367737.4.peg.475	yes
A and B	Nucleosides and Nucleotides	Purines	Purine conversions	Adenine phosphoribosyltransferase (EC 2.4.2.7)	fig|28198.16.peg.238	yes	fig|367737.4.peg.685	yes
A and B	Nucleosides and Nucleotides	Purines	Purine conversions	Adenylate kinase (EC 2.7.4.3)	fig|28198.16.peg.1527	yes	fig|367737.4.peg.767,fig|367737.4.peg.768	yes
A and B	Nucleosides and Nucleotides	Purines	Purine conversions	Adenylosuccinate lyase (EC 4.3.2.2)	fig|28198.16.peg.1634,fig|28198.16.peg.1635	yes	fig|367737.4.peg.19	yes
A and B	Nucleosides and Nucleotides	Purines	Purine conversions	Adenylosuccinate synthetase (EC 6.3.4.4)	fig|28198.16.peg.303,fig|28198.16.peg.304,fig|28198.16.peg.1864	yes	fig|367737.4.peg.132	yes
A and B	Nucleosides and Nucleotides	Purines	Purine conversions	GMP synthase [glutamine-hydrolyzing] (EC 6.3.5.2)	fig|28198.16.peg.947,fig|28198.16.peg.948,fig|28198.16.peg.949	yes	fig|367737.4.peg.906	yes
A and B	Nucleosides and Nucleotides	Purines	Purine conversions	Guanylate kinase (EC 2.7.4.8)	fig|28198.16.peg.1201	yes	fig|367737.4.peg.531	yes
A and B	Nucleosides and Nucleotides	Purines	Purine conversions	Inosine-5'-monophosphate dehydrogenase (EC 1.1.1.205)	fig|28198.16.peg.1115	yes	fig|367737.4.peg.1009	yes
A and B	Nucleosides and Nucleotides	Purines	Purine conversions	Nucleoside diphosphate kinase (EC 2.7.4.6)	fig|28198.16.peg.413	yes	fig|367737.4.peg.284	yes
A	Nucleosides and Nucleotides	Purines	Purine conversions	Xanthine-guanine phosphoribosyltransferase (EC 2.4.2.22)	fig|28198.16.peg.132	yes		no
B	Nucleosides and Nucleotides	Purines	De Novo Purine Biosynthesis	Phosphoribosylglycinamide formyltransferase 2 (EC 2.1.2.-)		no	fig|367737.4.peg.145	yes
B	Nucleosides and Nucleotides	Purines	GMP synthase	GMP synthase [glutamine-hydrolyzing], ATP pyrophosphatase subunit (EC 6.3.5.2)		no	fig|367737.4.peg.906	yes
B	Nucleosides and Nucleotides	Purines	GMP synthase	GMP synthase [glutamine-hydrolyzing], amidotransferase subunit (EC 6.3.5.2)		no	fig|367737.4.peg.906	yes
B	Nucleosides and Nucleotides	Purines	Purine conversions	Deoxyguanosinetriphosphate triphosphohydrolase (EC 3.1.5.1), subgroup 1		no	fig|367737.4.peg.1056	yes
A and B	Nucleosides and Nucleotides	Pyrimidines	De Novo Pyrimidine Synthesis	Aspartate carbamoyltransferase (EC 2.1.3.2)	fig|28198.16.peg.749,fig|28198.16.peg.750	yes	fig|367737.4.peg.253	yes
A and B	Nucleosides and Nucleotides	Pyrimidines	De Novo Pyrimidine Synthesis	Carbamoyl-phosphate synthase large chain (EC 6.3.5.5)	fig|28198.16.peg.510,fig|28198.16.peg.511,fig|28198.16.peg.1879	yes	fig|367737.4.peg.1350	yes
A and B	Nucleosides and Nucleotides	Pyrimidines	De Novo Pyrimidine Synthesis	Carbamoyl-phosphate synthase small chain (EC 6.3.5.5)	fig|28198.16.peg.306	yes	fig|367737.4.peg.130	yes
A and B	Nucleosides and Nucleotides	Pyrimidines	De Novo Pyrimidine Synthesis	Dihydroorotase (EC 3.5.2.3)	fig|28198.16.peg.582	yes	fig|367737.4.peg.191	yes
A and B	Nucleosides and Nucleotides	Pyrimidines	De Novo Pyrimidine Synthesis	Dihydroorotate dehydrogenase (EC 1.3.3.1)	fig|28198.16.peg.1267	yes	fig|367737.4.peg.860	yes
A and B	Nucleosides and Nucleotides	Pyrimidines	De Novo Pyrimidine Synthesis	Orotate phosphoribosyltransferase (EC 2.4.2.10)	fig|28198.16.peg.899	yes	fig|367737.4.peg.2215	yes
A and B	Nucleosides and Nucleotides	Pyrimidines	De Novo Pyrimidine Synthesis	Orotidine 5'-phosphate decarboxylase (EC 4.1.1.23)	fig|28198.16.peg.1157	yes	fig|367737.4.peg.1816	yes
A	Nucleosides and Nucleotides	no subcategory	Ribonucleotide reduction	Ribonucleotide reductase of class III (anaerobic), activating protein (EC 1.97.1.4)	fig|28198.16.peg.43	yes		no
A	Nucleosides and Nucleotides	no subcategory	Ribonucleotide reduction	Ribonucleotide reductase of class III (anaerobic), large subunit (EC 1.17.4.2)	fig|28198.16.peg.45	yes		no
B	Nucleosides and Nucleotides	no subcategory	Ribonucleotide reduction	Ribonucleotide reductase of class Ia (aerobic), beta subunit (EC 1.17.4.1)		no	fig|367737.4.peg.21	yes
B	Phosphorus Metabolism	no subcategory	High affinity phosphate transporter and control of PHO regulon	Phosphate transport system permease protein PstC (TC 3.A.1.7.1)		no	fig|367737.4.peg.87	yes
B	Phosphorus Metabolism	no subcategory	Phosphate metabolism	Low-affinity inorganic phosphate transporter		no	fig|367737.4.peg.512	yes
B	Phosphorus Metabolism	no subcategory	Phosphate metabolism	Predicted ATPase related to phosphate starvation-inducible protein PhoH		no	fig|367737.4.peg.1509,fig|367737.4.peg.47	yes
B	Phosphorus Metabolism	no subcategory	Phosphate metabolism	Probable low-affinity inorganic phosphate transporter		no	fig|367737.4.peg.43	yes
B	Potassium metabolism	no subcategory	Glutathione-regulated potassium-efflux system and associated functions	Glutathione-regulated potassium-efflux system protein KefB		no	fig|367737.4.peg.1435	yes
B	Potassium metabolism	no subcategory	Glutathione-regulated potassium-efflux system and associated functions	cAMP-binding proteins - catabolite gene activator and regulatory subunit of cAMP-dependent protein kinases		no	fig|367737.4.peg.1030	yes
B	Potassium metabolism	no subcategory	Hyperosmotic potassium uptake	Potassium uptake protein TrkH		no	fig|367737.4.peg.1270	yes
B	Potassium metabolism	no subcategory	Potassium homeostasis	Osmosensitive K+ channel histidine kinase KdpD (EC 2.7.3.-)		no	fig|367737.4.peg.1272,fig|367737.4.peg.425	yes
A and B	Protein Metabolism	Protein biosynthesis	Glycyl-tRNA synthetase	Glycyl-tRNA synthetase alpha chain (EC 6.1.1.14)	fig|28198.16.peg.650,fig|28198.16.peg.651	yes	fig|367737.4.peg.1928	yes
A and B	Protein Metabolism	Protein biosynthesis	Glycyl-tRNA synthetase	Glycyl-tRNA synthetase beta chain (EC 6.1.1.14)	fig|28198.16.peg.1297	yes	fig|367737.4.peg.1214	yes
A and B	Protein Metabolism	Protein biosynthesis	Programmed frameshift	Peptide chain release factor 2	fig|28198.16.peg.250	yes	fig|367737.4.peg.2016	yes
A and B	Protein Metabolism	Protein biosynthesis	Ribosome LSU bacterial	LSU ribosomal protein L10p (P0)	fig|28198.16.peg.463	yes	fig|367737.4.peg.1846	yes
A and B	Protein Metabolism	Protein biosynthesis	Ribosome LSU bacterial	LSU ribosomal protein L11p (L12e)	fig|28198.16.peg.461,fig|28198.16.peg.1944	yes	fig|367737.4.peg.1848	yes
A and B	Protein Metabolism	Protein biosynthesis	Ribosome LSU bacterial	LSU ribosomal protein L13p (L13Ae)	fig|28198.16.peg.1165	yes	fig|367737.4.peg.94	yes
A and B	Protein Metabolism	Protein biosynthesis	Ribosome LSU bacterial	LSU ribosomal protein L14p (L23e)	fig|28198.16.peg.680	yes	fig|367737.4.peg.750	yes
A and B	Protein Metabolism	Protein biosynthesis	Ribosome LSU bacterial	LSU ribosomal protein L15p (L27Ae)	fig|28198.16.peg.688	yes	fig|367737.4.peg.758	yes
A and B	Protein Metabolism	Protein biosynthesis	Ribosome LSU bacterial	LSU ribosomal protein L16p (L10e)	fig|28198.16.peg.677	yes	fig|367737.4.peg.747	yes
A and B	Protein Metabolism	Protein biosynthesis	Ribosome LSU bacterial	LSU ribosomal protein L17p	fig|28198.16.peg.1113	yes	fig|367737.4.peg.1007	yes
A and B	Protein Metabolism	Protein biosynthesis	Ribosome LSU bacterial	LSU ribosomal protein L18p (L5e)	fig|28198.16.peg.686	yes	fig|367737.4.peg.756	yes
A and B	Protein Metabolism	Protein biosynthesis	Ribosome LSU bacterial	LSU ribosomal protein L19p	fig|28198.16.peg.1586	yes	fig|367737.4.peg.1970	yes
A and B	Protein Metabolism	Protein biosynthesis	Ribosome LSU bacterial	LSU ribosomal protein L1p (L10Ae)	fig|28198.16.peg.462,fig|28198.16.peg.1945	yes	fig|367737.4.peg.1847	yes
A and B	Protein Metabolism	Protein biosynthesis	Ribosome LSU bacterial	LSU ribosomal protein L20p	fig|28198.16.peg.760	yes	fig|367737.4.peg.74	yes
A and B	Protein Metabolism	Protein biosynthesis	Ribosome LSU bacterial	LSU ribosomal protein L21p	fig|28198.16.peg.309	yes	fig|367737.4.peg.1583	yes
A and B	Protein Metabolism	Protein biosynthesis	Ribosome LSU bacterial	LSU ribosomal protein L22p (L17e)	fig|28198.16.peg.675	yes	fig|367737.4.peg.745	yes
A and B	Protein Metabolism	Protein biosynthesis	Ribosome LSU bacterial	LSU ribosomal protein L23p (L23Ae)	fig|28198.16.peg.672	yes	fig|367737.4.peg.742	yes
A and B	Protein Metabolism	Protein biosynthesis	Ribosome LSU bacterial	LSU ribosomal protein L24p (L26e)	fig|28198.16.peg.681	yes	fig|367737.4.peg.751	yes
A and B	Protein Metabolism	Protein biosynthesis	Ribosome LSU bacterial	LSU ribosomal protein L25p	fig|28198.16.peg.588	yes	fig|367737.4.peg.625	yes
A and B	Protein Metabolism	Protein biosynthesis	Ribosome LSU bacterial	LSU ribosomal protein L27p	fig|28198.16.peg.310	yes	fig|367737.4.peg.1582	yes
A and B	Protein Metabolism	Protein biosynthesis	Ribosome LSU bacterial	LSU ribosomal protein L28p	fig|28198.16.peg.1207	yes	fig|367737.4.peg.1761	yes
A and B	Protein Metabolism	Protein biosynthesis	Ribosome LSU bacterial	LSU ribosomal protein L29p (L35e)	fig|28198.16.peg.678	yes	fig|367737.4.peg.748	yes
A and B	Protein Metabolism	Protein biosynthesis	Ribosome LSU bacterial	LSU ribosomal protein L2p (L8e)	fig|28198.16.peg.673	yes	fig|367737.4.peg.743	yes
A and B	Protein Metabolism	Protein biosynthesis	Ribosome LSU bacterial	LSU ribosomal protein L31p	fig|28198.16.peg.1280	yes	fig|367737.4.peg.152	yes
A and B	Protein Metabolism	Protein biosynthesis	Ribosome LSU bacterial	LSU ribosomal protein L31p, zinc-dependent	fig|28198.16.peg.1280	yes	fig|367737.4.peg.152	yes
A and B	Protein Metabolism	Protein biosynthesis	Ribosome LSU bacterial	LSU ribosomal protein L32p	fig|28198.16.peg.411	yes	fig|367737.4.peg.286	yes
A and B	Protein Metabolism	Protein biosynthesis	Ribosome LSU bacterial	LSU ribosomal protein L33p	fig|28198.16.peg.458	yes	fig|367737.4.peg.1851	yes
A and B	Protein Metabolism	Protein biosynthesis	Ribosome LSU bacterial	LSU ribosomal protein L34p	fig|28198.16.peg.837	yes	fig|367737.4.peg.1598	yes
A and B	Protein Metabolism	Protein biosynthesis	Ribosome LSU bacterial	LSU ribosomal protein L35p	fig|28198.16.peg.759	yes	fig|367737.4.peg.73	yes
A and B	Protein Metabolism	Protein biosynthesis	Ribosome LSU bacterial	LSU ribosomal protein L36p	fig|28198.16.peg.1107	yes	fig|367737.4.peg.1002	yes
A and B	Protein Metabolism	Protein biosynthesis	Ribosome LSU bacterial	LSU ribosomal protein L3p (L3e)	fig|28198.16.peg.670,fig|28198.16.peg.1919	yes	fig|367737.4.peg.740	yes
A and B	Protein Metabolism	Protein biosynthesis	Ribosome LSU bacterial	LSU ribosomal protein L4p (L1e)	fig|28198.16.peg.671	yes	fig|367737.4.peg.741	yes
A and B	Protein Metabolism	Protein biosynthesis	Ribosome LSU bacterial	LSU ribosomal protein L5p (L11e)	fig|28198.16.peg.682	yes	fig|367737.4.peg.752	yes
A and B	Protein Metabolism	Protein biosynthesis	Ribosome LSU bacterial	LSU ribosomal protein L6p (L9e)	fig|28198.16.peg.684	yes	fig|367737.4.peg.755	yes
A and B	Protein Metabolism	Protein biosynthesis	Ribosome LSU bacterial	LSU ribosomal protein L7/L12 (P1/P2)	fig|28198.16.peg.464	yes	fig|367737.4.peg.1845	yes
A and B	Protein Metabolism	Protein biosynthesis	Ribosome LSU bacterial	LSU ribosomal protein L9p	fig|28198.16.peg.606	yes	fig|367737.4.peg.956	yes
A and B	Protein Metabolism	Protein biosynthesis	Translation elongation factor G family	Translation elongation factor G	fig|28198.16.peg.1245,fig|28198.16.peg.1246	yes	fig|367737.4.peg.1936	yes
A and B	Protein Metabolism	Protein biosynthesis	Translation elongation factors bacterial	Translation elongation factor G	fig|28198.16.peg.1245,fig|28198.16.peg.1246	yes	fig|367737.4.peg.1936	yes
A and B	Protein Metabolism	Protein biosynthesis	Translation elongation factors bacterial	Translation elongation factor LepA	fig|28198.16.peg.1593,fig|28198.16.peg.1970	yes	fig|367737.4.peg.471	yes
A and B	Protein Metabolism	Protein biosynthesis	Translation elongation factors bacterial	Translation elongation factor P	fig|28198.16.peg.274	yes	fig|367737.4.peg.1992	yes
A and B	Protein Metabolism	Protein biosynthesis	Translation elongation factors bacterial	Translation elongation factor Ts	fig|28198.16.peg.1198,fig|28198.16.peg.1976	yes	fig|367737.4.peg.528	yes
A and B	Protein Metabolism	Protein biosynthesis	Translation elongation factors bacterial	Translation elongation factor Tu	fig|28198.16.peg.457	yes	fig|367737.4.peg.1852	yes
A and B	Protein Metabolism	Protein biosynthesis	Translation initiation factors bacterial	Ribosome-binding factor A	fig|28198.16.peg.265	yes	fig|367737.4.peg.1989	yes
A and B	Protein Metabolism	Protein biosynthesis	Translation initiation factors bacterial	Translation initiation factor 1	fig|28198.16.peg.691	yes	fig|367737.4.peg.761	yes
A and B	Protein Metabolism	Protein biosynthesis	Translation initiation factors bacterial	Translation initiation factor 2	fig|28198.16.peg.262,fig|28198.16.peg.263,fig|28198.16.peg.264	yes	fig|367737.4.peg.1988	yes
A and B	Protein Metabolism	Protein biosynthesis	Translation initiation factors bacterial	Translation initiation factor 3	fig|28198.16.peg.758	yes	fig|367737.4.peg.72	yes
A and B	Protein Metabolism	Protein biosynthesis	Translation termination factors bacterial	Methionine aminopeptidase (EC 3.4.11.18)	fig|28198.16.peg.690	yes	fig|367737.4.peg.760	yes
A and B	Protein Metabolism	Protein biosynthesis	Translation termination factors bacterial	Peptide chain release factor 1	fig|28198.16.peg.738	yes	fig|367737.4.peg.83	yes
A and B	Protein Metabolism	Protein biosynthesis	Translation termination factors bacterial	Peptide chain release factor 2	fig|28198.16.peg.250	yes	fig|367737.4.peg.2016	yes
A and B	Protein Metabolism	Protein biosynthesis	Translation termination factors bacterial	Peptide deformylase (EC 3.5.1.88)	fig|28198.16.peg.1412	yes	fig|367737.4.peg.1674	yes
A and B	Protein Metabolism	Protein biosynthesis	Translation termination factors bacterial	Peptidyl-tRNA hydrolase (EC 3.1.1.29)	fig|28198.16.peg.589	yes	fig|367737.4.peg.626	yes
A and B	Protein Metabolism	Protein biosynthesis	Translation termination factors bacterial	Ribosome recycling factor	fig|28198.16.peg.900,fig|28198.16.peg.1924	yes	fig|367737.4.peg.2214	yes
A and B	Protein Metabolism	Protein biosynthesis	Translation termination factors bacterial	tmRNA-binding protein SmpB	fig|28198.16.peg.848,fig|28198.16.peg.849	yes	fig|367737.4.peg.2026	yes
A and B	Protein Metabolism	Protein biosynthesis	Universal GTPases	GTP-binding and nucleic acid-binding protein YchF	fig|28198.16.peg.621	yes	fig|367737.4.peg.721	yes
A and B	Protein Metabolism	Protein biosynthesis	Universal GTPases	GTP-binding protein EngA	fig|28198.16.peg.4,fig|28198.16.peg.5	yes	fig|367737.4.peg.1162	yes
A and B	Protein Metabolism	Protein biosynthesis	Universal GTPases	GTP-binding protein EngB	fig|28198.16.peg.1122	yes	fig|367737.4.peg.967	yes
A and B	Protein Metabolism	Protein biosynthesis	Universal GTPases	GTP-binding protein Obg	fig|28198.16.peg.311,fig|28198.16.peg.312,fig|28198.16.peg.1867	yes	fig|367737.4.peg.1581	yes
A and B	Protein Metabolism	Protein biosynthesis	Universal GTPases	GTP-binding protein TypA/BipA	fig|28198.16.peg.917	yes	fig|367737.4.peg.2245	yes
A and B	Protein Metabolism	Protein biosynthesis	Universal GTPases	GTPase and tRNA-U34 5-formylation enzyme TrmE	fig|28198.16.peg.831,fig|28198.16.peg.832	yes	fig|367737.4.peg.1593	yes
A and B	Protein Metabolism	Protein biosynthesis	Universal GTPases	Signal recognition particle receptor protein FtsY (=alpha subunit) (TC 3.A.5.1.1)	fig|28198.16.peg.1418	yes	fig|367737.4.peg.873	yes
A and B	Protein Metabolism	Protein biosynthesis	Universal GTPases	Signal recognition particle, subunit Ffh SRP54 (TC 3.A.5.1.1)	fig|28198.16.peg.656	yes	fig|367737.4.peg.1923	yes
A and B	Protein Metabolism	Protein biosynthesis	Universal GTPases	Translation elongation factor G	fig|28198.16.peg.1245,fig|28198.16.peg.1246	yes	fig|367737.4.peg.1936	yes
A and B	Protein Metabolism	Protein biosynthesis	Universal GTPases	Translation elongation factor LepA	fig|28198.16.peg.1593,fig|28198.16.peg.1970	yes	fig|367737.4.peg.471	yes
A and B	Protein Metabolism	Protein biosynthesis	Universal GTPases	Translation elongation factor Tu	fig|28198.16.peg.457	yes	fig|367737.4.peg.1852	yes
A and B	Protein Metabolism	Protein biosynthesis	Universal GTPases	Translation initiation factor 2	fig|28198.16.peg.262,fig|28198.16.peg.263,fig|28198.16.peg.264	yes	fig|367737.4.peg.1988	yes
A and B	Protein Metabolism	Protein biosynthesis	tRNA aminoacylation, Ala	Alanyl-tRNA synthetase (EC 6.1.1.7)	fig|28198.16.peg.839	yes	fig|367737.4.peg.2036	yes
A and B	Protein Metabolism	Protein biosynthesis	tRNA aminoacylation, Asp and Asn	Aspartyl-tRNA synthetase (EC 6.1.1.12)	fig|28198.16.peg.694	yes	fig|367737.4.peg.764	yes
A and B	Protein Metabolism	Protein biosynthesis	tRNA aminoacylation, Asp and Asn	Aspartyl-tRNA(Asn) amidotransferase subunit A (EC 6.3.5.6)	fig|28198.16.peg.1114	yes	fig|367737.4.peg.1008	yes
A and B	Protein Metabolism	Protein biosynthesis	tRNA aminoacylation, Asp and Asn	Aspartyl-tRNA(Asn) amidotransferase subunit C (EC 6.3.5.6)	fig|28198.16.peg.1327	yes	fig|367737.4.peg.221	yes
A and B	Protein Metabolism	Protein biosynthesis	tRNA aminoacylation, Asp and Asn	Aspartyl-tRNA(Asn) synthetase (EC 6.1.1.23)	fig|28198.16.peg.694	yes	fig|367737.4.peg.764	yes
A and B	Protein Metabolism	Protein biosynthesis	tRNA aminoacylation, Glu and Gln	Glutamyl-tRNA synthetase (EC 6.1.1.17)	fig|28198.16.peg.629	yes	fig|367737.4.peg.58	yes
A and B	Protein Metabolism	Protein biosynthesis	tRNA aminoacylation, Glu and Gln	Glutamyl-tRNA(Gln) amidotransferase subunit A (EC 6.3.5.7)	fig|28198.16.peg.1114	yes	fig|367737.4.peg.1008	yes
A and B	Protein Metabolism	Protein biosynthesis	tRNA aminoacylation, Glu and Gln	Glutamyl-tRNA(Gln) amidotransferase subunit C (EC 6.3.5.7)	fig|28198.16.peg.1327	yes	fig|367737.4.peg.221	yes
A and B	Protein Metabolism	Protein biosynthesis	tRNA aminoacylation, Glu and Gln	Glutamyl-tRNA(Gln) synthetase (EC 6.1.1.24)	fig|28198.16.peg.155	yes	fig|367737.4.peg.1200	yes
A and B	Protein Metabolism	Protein biosynthesis	tRNA aminoacylation, Gly	Glycyl-tRNA synthetase alpha chain (EC 6.1.1.14)	fig|28198.16.peg.650,fig|28198.16.peg.651	yes	fig|367737.4.peg.1928	yes
A and B	Protein Metabolism	Protein biosynthesis	tRNA aminoacylation, Gly	Glycyl-tRNA synthetase beta chain (EC 6.1.1.14)	fig|28198.16.peg.1297	yes	fig|367737.4.peg.1214	yes
A and B	Protein Metabolism	Protein biosynthesis	tRNA aminoacylation, His	Histidyl-tRNA synthetase (EC 6.1.1.21)	fig|28198.16.peg.610	yes	fig|367737.4.peg.951	yes
A and B	Protein Metabolism	Protein biosynthesis	tRNA aminoacylation, Ile	Isoleucyl-tRNA synthetase (EC 6.1.1.5)	fig|28198.16.peg.1191,fig|28198.16.peg.1192	yes	fig|367737.4.peg.504	yes
A and B	Protein Metabolism	Protein biosynthesis	tRNA aminoacylation, Leu	Leucyl-tRNA synthetase (EC 6.1.1.4)	fig|28198.16.peg.914	yes	fig|367737.4.peg.394	yes
A and B	Protein Metabolism	Protein biosynthesis	tRNA aminoacylation, Met	Methionyl-tRNA synthetase (EC 6.1.1.10)	fig|28198.16.peg.147,fig|28198.16.peg.148	yes	fig|367737.4.peg.1207	yes
A and B	Protein Metabolism	Protein biosynthesis	tRNA aminoacylation, Pro	Cys-tRNA(Pro) deacylase YbaK	fig|28198.16.peg.937,fig|28198.16.peg.938	yes	fig|367737.4.peg.1530	yes
A and B	Protein Metabolism	Protein biosynthesis	tRNA aminoacylation, Pro	Prolyl-tRNA synthetase (EC 6.1.1.15), bacterial type	fig|28198.16.peg.1345	yes	fig|367737.4.peg.381	yes
A and B	Protein Metabolism	Protein biosynthesis	tRNA aminoacylation, Ser	Seryl-tRNA synthetase (EC 6.1.1.11)	fig|28198.16.peg.1095	yes	fig|367737.4.peg.338	yes
A and B	Protein Metabolism	Protein biosynthesis	tRNA aminoacylation, Thr	Threonyl-tRNA synthetase (EC 6.1.1.3)	fig|28198.16.peg.757,fig|28198.16.peg.1838	yes	fig|367737.4.peg.71	yes
A and B	Protein Metabolism	Protein biosynthesis	tRNA aminoacylation, Trp	Tryptophanyl-tRNA synthetase (EC 6.1.1.2)	fig|28198.16.peg.1059,fig|28198.16.peg.1060	yes	fig|367737.4.peg.320	yes
A and B	Protein Metabolism	Protein biosynthesis	tRNA aminoacylation, Tyr	Tyrosyl-tRNA synthetase (EC 6.1.1.1)	fig|28198.16.peg.594	yes	fig|367737.4.peg.631	yes
A and B	Protein Metabolism	Protein biosynthesis	tRNA aminoacylation, Val	Valyl-tRNA synthetase (EC 6.1.1.9)	fig|28198.16.peg.1787	yes	fig|367737.4.peg.568	yes
A	Protein Metabolism	Protein biosynthesis	Ribosome biogenesis bacterial	hypothetical protein sometimes fused to ribosomal protein S6 glutaminyl transferase	fig|28198.16.peg.447	yes		no
A	Protein Metabolism	Protein biosynthesis	Translation initiation factors bacterial	Translation initiation factor SUI1-related protein	fig|28198.16.peg.1552	yes		no
B	Protein Metabolism	Protein biosynthesis	Ribosome SSU bacterial	SSU ribosomal protein S14p (S29e)		no	fig|367737.4.peg.753	yes
B	Protein Metabolism	Protein biosynthesis	Ribosome SSU bacterial	SSU ribosomal protein S14p (S29e), zinc-dependent		no	fig|367737.4.peg.753	yes
B	Protein Metabolism	Protein biosynthesis	Ribosome SSU bacterial	SSU ribosomal protein S9p (S16e)		no	fig|367737.4.peg.95	yes
B	Protein Metabolism	Protein biosynthesis	tRNA aminoacylation, Arg	Arginyl-tRNA synthetase (EC 6.1.1.19)		no	fig|367737.4.peg.2069	yes
B	Protein Metabolism	Protein biosynthesis	tRNA aminoacylation, Asp and Asn	Aspartyl-tRNA(Asn) amidotransferase subunit B (EC 6.3.5.6)		no	fig|367737.4.peg.30	yes
B	Protein Metabolism	Protein biosynthesis	tRNA aminoacylation, Cys	Cysteinyl-tRNA synthetase (EC 6.1.1.16)		no	fig|367737.4.peg.237	yes
B	Protein Metabolism	Protein biosynthesis	tRNA aminoacylation, Glu and Gln	Glutamyl-tRNA(Gln) amidotransferase subunit B (EC 6.3.5.7)		no	fig|367737.4.peg.30	yes
B	Protein Metabolism	Protein biosynthesis	tRNA aminoacylation, Lys	Lysyl-tRNA synthetase (class II) (EC 6.1.1.6)		no	fig|367737.4.peg.641	yes
B	Protein Metabolism	Protein biosynthesis	tRNA aminoacylation, Phe	Phenylalanyl-tRNA synthetase beta chain (EC 6.1.1.20)		no	fig|367737.4.peg.1997	yes
A and B	Protein Metabolism	Protein degradation	Dipeptidases (EC 3.4.13.-)	Aminoacyl-histidine dipeptidase (Peptidase D) (EC 3.4.13.3)	fig|28198.16.peg.81	yes	fig|367737.4.peg.1286	yes
A and B	Protein Metabolism	Protein degradation	Protein degradation	Leucyl/phenylalanyl-tRNA--protein transferase (EC 2.3.2.6)	fig|28198.16.peg.873,fig|28198.16.peg.1680	yes	fig|367737.4.peg.1083	yes
A and B	Protein Metabolism	Protein degradation	Protein degradation	Oligopeptidase A (EC 3.4.24.70)	fig|28198.16.peg.32,fig|28198.16.peg.33	yes	fig|367737.4.peg.1181	yes
A and B	Protein Metabolism	Protein degradation	Proteolysis in bacteria, ATP-dependent	ATP-dependent Clp protease ATP-binding subunit ClpA	fig|28198.16.peg.1590	yes	fig|367737.4.peg.1869	yes
A and B	Protein Metabolism	Protein degradation	Proteolysis in bacteria, ATP-dependent	ATP-dependent Clp protease ATP-binding subunit ClpX	fig|28198.16.peg.1042	yes	fig|367737.4.peg.2155	yes
A and B	Protein Metabolism	Protein degradation	Proteolysis in bacteria, ATP-dependent	ATP-dependent Clp protease adaptor protein ClpS	fig|28198.16.peg.1589,fig|28198.16.peg.1949	yes	fig|367737.4.peg.1870	yes
A and B	Protein Metabolism	Protein degradation	Proteolysis in bacteria, ATP-dependent	ATP-dependent Clp protease proteolytic subunit (EC 3.4.21.92)	fig|28198.16.peg.1411	yes	fig|367737.4.peg.1675	yes
A and B	Protein Metabolism	Protein degradation	Proteolysis in bacteria, ATP-dependent	ATP-dependent hsl protease ATP-binding subunit HslU	fig|28198.16.peg.604	yes	fig|367737.4.peg.958	yes
A and B	Protein Metabolism	Protein degradation	Proteolysis in bacteria, ATP-dependent	ATP-dependent protease HslV (EC 3.4.25.-)	fig|28198.16.peg.605	yes	fig|367737.4.peg.957	yes
A and B	Protein Metabolism	Protein degradation	Proteolysis in bacteria, ATP-dependent	ATP-dependent protease La (EC 3.4.21.53) Type I	fig|28198.16.peg.1818	yes	fig|367737.4.peg.579	yes
A and B	Protein Metabolism	Protein degradation	Proteolysis in bacteria, ATP-dependent	ClpB protein	fig|28198.16.peg.838	yes	fig|367737.4.peg.1599	yes
A and B	Protein Metabolism	Protein degradation	Proteolysis in bacteria, ATP-dependent	DNA repair protein RadA	fig|28198.16.peg.1545	yes	fig|367737.4.peg.868	yes
B	Protein Metabolism	Protein degradation	Aminopeptidases (EC 3.4.11.-)	Cytosol aminopeptidase PepA (EC 3.4.11.1)		no	fig|367737.4.peg.688	yes
B	Protein Metabolism	Protein degradation	Dipeptidases (EC 3.4.13.-)	Alpha-aspartyl dipeptidase Peptidase E (EC 3.4.13.21)		no	fig|367737.4.peg.867	yes
B	Protein Metabolism	Protein degradation	Protein degradation	Aminopeptidase YpdF (MP-, MA-, MS-, AP-, NP- specific)		no	fig|367737.4.peg.480	yes
A and B	Protein Metabolism	Protein folding	GroEL GroES	Chaperone protein DnaJ	fig|28198.16.peg.71,fig|28198.16.peg.72	yes	fig|367737.4.peg.1275	yes
A and B	Protein Metabolism	Protein folding	GroEL GroES	Chaperone protein DnaK	fig|28198.16.peg.1735,fig|28198.16.peg.1786	yes	fig|367737.4.peg.2135	yes
A and B	Protein Metabolism	Protein folding	GroEL GroES	Heat shock protein 60 family chaperone GroEL	fig|28198.16.peg.504,fig|28198.16.peg.1064,fig|28198.16.peg.1941	yes	fig|367737.4.peg.424	yes
A and B	Protein Metabolism	Protein folding	GroEL GroES	Heat shock protein 60 family co-chaperone GroES	fig|28198.16.peg.1065	yes	fig|367737.4.peg.423	yes
A and B	Protein Metabolism	Protein folding	Peptidyl-prolyl cis-trans isomerase	FKBP-type peptidyl-prolyl cis-trans isomerase SlyD (EC 5.2.1.8)	fig|28198.16.peg.334	yes	fig|367737.4.peg.1560	yes
A and B	Protein Metabolism	Protein folding	Peptidyl-prolyl cis-trans isomerase	Peptidyl-prolyl cis-trans isomerase PpiD (EC 5.2.1.8)	fig|28198.16.peg.533,fig|28198.16.peg.858,fig|28198.16.peg.1031	yes	fig|367737.4.peg.1359,fig|367737.4.peg.369	yes
A and B	Protein Metabolism	Protein folding	Periplasmic disulfide interchange	Cytochrome c-type biogenesis protein DsbD, protein-disulfide reductase (EC 1.8.1.8)	fig|28198.16.peg.444	yes	fig|367737.4.peg.2127	yes
A and B	Protein Metabolism	Protein folding	Protein chaperones	Chaperone protein DnaJ	fig|28198.16.peg.71,fig|28198.16.peg.72	yes	fig|367737.4.peg.1275	yes
A and B	Protein Metabolism	Protein folding	Protein chaperones	Chaperone protein DnaK	fig|28198.16.peg.1735,fig|28198.16.peg.1786	yes	fig|367737.4.peg.2135	yes
A and B	Protein Metabolism	Protein folding	Protein chaperones	Chaperone protein HtpG	fig|28198.16.peg.1731	yes	fig|367737.4.peg.1518	yes
A and B	Protein Metabolism	Protein folding	Protein chaperones	ClpB protein	fig|28198.16.peg.838	yes	fig|367737.4.peg.1599	yes
A and B	Protein Metabolism	Protein folding	Protein chaperones	DnaJ-class molecular chaperone CbpA	fig|28198.16.peg.168,fig|28198.16.peg.169	yes	fig|367737.4.peg.1340	yes
A and B	Protein Metabolism	Protein folding	Protein chaperones	HspR, transcriptional repressor of DnaK operon	fig|28198.16.peg.170	yes	fig|367737.4.peg.1341	yes
B	Protein Metabolism	Protein folding	GroEL GroES	Heat shock protein GrpE		no	fig|367737.4.peg.2136	yes
B	Protein Metabolism	Protein folding	GroEL GroES	Heat-inducible transcription repressor HrcA		no	fig|367737.4.peg.2137	yes
A and B	Protein Metabolism	Protein processing and modification	G3E family of P-loop GTPases (metallocenter biosynthesis)	FKBP-type peptidyl-prolyl cis-trans isomerase SlyD (EC 5.2.1.8)	fig|28198.16.peg.334	yes	fig|367737.4.peg.1560	yes
A and B	Protein Metabolism	Protein processing and modification	G3E family of P-loop GTPases (metallocenter biosynthesis)	[NiFe] hydrogenase metallocenter assembly protein HypC	fig|28198.16.peg.1499	yes	fig|367737.4.peg.1385	yes
A and B	Protein Metabolism	Protein processing and modification	G3E family of P-loop GTPases (metallocenter biosynthesis)	[NiFe] hydrogenase metallocenter assembly protein HypD	fig|28198.16.peg.1498	yes	fig|367737.4.peg.1384	yes
A and B	Protein Metabolism	Protein processing and modification	G3E family of P-loop GTPases (metallocenter biosynthesis)	[NiFe] hydrogenase metallocenter assembly protein HypE	fig|28198.16.peg.1496	yes	fig|367737.4.peg.1379	yes
A and B	Protein Metabolism	Protein processing and modification	G3E family of P-loop GTPases (metallocenter biosynthesis)	[NiFe] hydrogenase nickel incorporation protein HypA	fig|28198.16.peg.1495	yes	fig|367737.4.peg.1378	yes
A and B	Protein Metabolism	Protein processing and modification	G3E family of P-loop GTPases (metallocenter biosynthesis)	[NiFe] hydrogenase nickel incorporation-associated protein HypB	fig|28198.16.peg.1500	yes	fig|367737.4.peg.1386	yes
A and B	Protein Metabolism	Protein processing and modification	Lipoprotein Biosynthesis	Lipoprotein signal peptidase (EC 3.4.23.36)	fig|28198.16.peg.742	yes	fig|367737.4.peg.80	yes
A and B	Protein Metabolism	Protein processing and modification	Lipoprotein Biosynthesis	Prolipoprotein diacylglyceryl transferase (EC 2.4.99.-)	fig|28198.16.peg.112,fig|28198.16.peg.113	yes	fig|367737.4.peg.1248	yes
A and B	Protein Metabolism	Protein processing and modification	Ribosomal protein S12p Asp methylthiotransferase	Ribosomal protein S12p Asp88 (E. coli) methylthiotransferase	fig|28198.16.peg.1388	yes	fig|367737.4.peg.206	yes
A and B	Protein Metabolism	Protein processing and modification	Ribosomal protein S12p Asp methylthiotransferase	SSU ribosomal protein S12p (S23e)	fig|28198.16.peg.1243	yes	fig|367737.4.peg.1938	yes
A and B	Protein Metabolism	Protein processing and modification	Signal peptidase	Lipoprotein signal peptidase (EC 3.4.23.36)	fig|28198.16.peg.742	yes	fig|367737.4.peg.80	yes
B	Protein Metabolism	Protein processing and modification	G3E family of P-loop GTPases (metallocenter biosynthesis)	Urease accessory protein UreE		no	fig|367737.4.peg.796	yes
B	Protein Metabolism	Protein processing and modification	G3E family of P-loop GTPases (metallocenter biosynthesis)	Urease accessory protein UreF		no	fig|367737.4.peg.797	yes
B	Protein Metabolism	Protein processing and modification	G3E family of P-loop GTPases (metallocenter biosynthesis)	Urease accessory protein UreG		no	fig|367737.4.peg.798	yes
B	Protein Metabolism	Protein processing and modification	G3E family of P-loop GTPases (metallocenter biosynthesis)	Urease alpha subunit (EC 3.5.1.5)		no	fig|367737.4.peg.795	yes
B	Protein Metabolism	Protein processing and modification	G3E family of P-loop GTPases (metallocenter biosynthesis)	Urease beta subunit (EC 3.5.1.5)		no	fig|367737.4.peg.794	yes
B	Protein Metabolism	Protein processing and modification	G3E family of P-loop GTPases (metallocenter biosynthesis)	Urease gamma subunit (EC 3.5.1.5)		no	fig|367737.4.peg.794	yes
B	Protein Metabolism	Protein processing and modification	G3E family of P-loop GTPases (metallocenter biosynthesis)	[NiFe] hydrogenase metallocenter assembly protein HypF		no	fig|367737.4.peg.1401	yes
B	Protein Metabolism	Protein processing and modification	Lipoprotein Biosynthesis	Apolipoprotein N-acyltransferase (EC 2.3.1.-)		no	fig|367737.4.peg.386	yes
B	Protein Metabolism	Protein processing and modification	N-linked Glycosylation in Bacteria	Alpha-1,4-N-acetylgalactosamine transferase PglJ (EC 2.4.1.-)		no	fig|367737.4.peg.664	yes
B	Protein Metabolism	Protein processing and modification	Signal peptidase	Signal peptidase I (EC 3.4.21.89)		no	fig|367737.4.peg.623	yes
A and B	Protein Metabolism	Selenoproteins	Selenocysteine metabolism	L-seryl-tRNA(Sec) selenium transferase (EC 2.9.1.1)	fig|28198.16.peg.781	yes	fig|367737.4.peg.1499	yes
A and B	Protein Metabolism	Selenoproteins	Selenocysteine metabolism	Selenide,water dikinase (EC 2.7.9.3)	fig|28198.16.peg.1085	yes	fig|367737.4.peg.1489	yes
A and B	Protein Metabolism	Selenoproteins	Selenocysteine metabolism	selenocysteine-containing	fig|28198.16.peg.708,fig|28198.16.peg.709,fig|28198.16.peg.710,fig|28198.16.peg.712,fig|28198.16.peg.1085	yes	fig|367737.4.peg.1474,fig|367737.4.peg.1487,fig|367737.4.peg.1489	yes
A and B	Protein Metabolism	Selenoproteins	Selenoprotein O	Selenoprotein O and cysteine-containing homologs	fig|28198.16.peg.953,fig|28198.16.peg.1914	yes	fig|367737.4.peg.901	yes
B	Protein Metabolism	Selenoproteins	Selenocysteine metabolism	Selenocysteine-specific translation elongation factor		no	fig|367737.4.peg.1500	yes
A and B	RNA Metabolism	RNA processing and modification	16S rRNA modification within P site of ribosome	Cell division protein FtsI [Peptidoglycan synthetase] (EC 2.4.1.129)	fig|28198.16.peg.1370,fig|28198.16.peg.1565	yes	fig|367737.4.peg.1866,fig|367737.4.peg.982	yes
A and B	RNA Metabolism	RNA processing and modification	16S rRNA modification within P site of ribosome	rRNA small subunit methyltransferase H	fig|28198.16.peg.159	yes	fig|367737.4.peg.1300	yes
A and B	RNA Metabolism	RNA processing and modification	16S rRNA modification within P site of ribosome	rRNA small subunit methyltransferase I	fig|28198.16.peg.1281,fig|28198.16.peg.1971	yes	fig|367737.4.peg.153	yes
A and B	RNA Metabolism	RNA processing and modification	ATP-dependent RNA helicases, bacterial	ATP-dependent 23S rRNA helicase DbpA	fig|28198.16.peg.1675,fig|28198.16.peg.1836	yes	fig|367737.4.peg.1514	yes
A and B	RNA Metabolism	RNA processing and modification	ATP-dependent RNA helicases, bacterial	ATP-dependent RNA helicase RhlE	fig|28198.16.peg.1129,fig|28198.16.peg.1433,fig|28198.16.peg.1434	yes	fig|367737.4.peg.1455	yes
A and B	RNA Metabolism	RNA processing and modification	Methylthiotransferases	Ribosomal protein S12p Asp88 (E. coli) methylthiotransferase	fig|28198.16.peg.1388	yes	fig|367737.4.peg.206	yes
A and B	RNA Metabolism	RNA processing and modification	Methylthiotransferases	tRNA-i(6)A37 methylthiotransferase	fig|28198.16.peg.1703	yes	fig|367737.4.peg.240	yes
A and B	RNA Metabolism	RNA processing and modification	Methylthiotransferases	tRNA-t(6)A37 methylthiotransferase	fig|28198.16.peg.90	yes	fig|367737.4.peg.1115	yes
A and B	RNA Metabolism	RNA processing and modification	Queuosine-Archaeosine Biosynthesis	GTP cyclohydrolase I (EC 3.5.4.16) type 1	fig|28198.16.peg.718	yes	fig|367737.4.peg.1615	yes
A and B	RNA Metabolism	RNA processing and modification	Queuosine-Archaeosine Biosynthesis	Queuosine Biosynthesis QueC ATPase	fig|28198.16.peg.881	yes	fig|367737.4.peg.2006	yes
A and B	RNA Metabolism	RNA processing and modification	Queuosine-Archaeosine Biosynthesis	Queuosine Biosynthesis QueE Radical SAM	fig|28198.16.peg.883	yes	fig|367737.4.peg.2004	yes
A and B	RNA Metabolism	RNA processing and modification	Queuosine-Archaeosine Biosynthesis	Queuosine biosynthesis QueD, PTPS-I	fig|28198.16.peg.882	yes	fig|367737.4.peg.2005	yes
A and B	RNA Metabolism	RNA processing and modification	Queuosine-Archaeosine Biosynthesis	S-adenosylmethionine:tRNA ribosyltransferase-isomerase (EC 5.-.-.-)	fig|28198.16.peg.182	yes	fig|367737.4.peg.1238	yes
A and B	RNA Metabolism	RNA processing and modification	Queuosine-Archaeosine Biosynthesis	tRNA-guanine transglycosylase (EC 2.4.2.29)	fig|28198.16.peg.1328	yes	fig|367737.4.peg.222	yes
A and B	RNA Metabolism	RNA processing and modification	RNA methylation	23S rRNA (guanosine-2'-O-) -methyltransferase rlmB (EC 2.1.1.-)	fig|28198.16.peg.1282	yes	fig|367737.4.peg.154	yes
A and B	RNA Metabolism	RNA processing and modification	RNA methylation	Ribosomal RNA large subunit methyltransferase N (EC 2.1.1.-)	fig|28198.16.peg.631	yes	fig|367737.4.peg.57	yes
A and B	RNA Metabolism	RNA processing and modification	RNA methylation	Ribosomal RNA small subunit methyltransferase E (EC 2.1.1.-)	fig|28198.16.peg.879	yes	fig|367737.4.peg.2008	yes
A and B	RNA Metabolism	RNA processing and modification	RNA methylation	SSU rRNA (adenine(1518)-N(6)/adenine(1519)-N(6))-dimethyltransferase (EC 2.1.1.182)	fig|28198.16.peg.637	yes	fig|367737.4.peg.53	yes
A and B	RNA Metabolism	RNA processing and modification	RNA methylation	rRNA small subunit 7-methylguanosine (m7G) methyltransferase GidB	fig|28198.16.peg.1301	yes	fig|367737.4.peg.1218	yes
A and B	RNA Metabolism	RNA processing and modification	RNA methylation	tRNA (Guanine37-N1) -methyltransferase (EC 2.1.1.31)	fig|28198.16.peg.1587	yes	fig|367737.4.peg.1971	yes
A and B	RNA Metabolism	RNA processing and modification	RNA methylation	tRNA (adenine37-N(6))-methyltransferase TrmN6 (EC 2.1.1.223)	fig|28198.16.peg.772	yes	fig|367737.4.peg.837	yes
A and B	RNA Metabolism	RNA processing and modification	RNA methylation	tRNA (cytidine(34)-2'-O)-methyltransferase (EC 2.1.1.207)	fig|28198.16.peg.955	yes	fig|367737.4.peg.1066	yes
A and B	RNA Metabolism	RNA processing and modification	RNA methylation	tRNA (guanine46-N7-)-methyltransferase (EC 2.1.1.33)	fig|28198.16.peg.392	yes	fig|367737.4.peg.987	yes
A and B	RNA Metabolism	RNA processing and modification	RNA methylation	tRNA (uracil(54)-C5)-methyltransferase (EC 2.1.1.35)	fig|28198.16.peg.1644	yes	fig|367737.4.peg.2147	yes
A and B	RNA Metabolism	RNA processing and modification	RNA methylation	tRNA-specific 2-thiouridylase MnmA	fig|28198.16.peg.1614	yes	fig|367737.4.peg.477,fig|367737.4.peg.478	yes
A and B	RNA Metabolism	RNA processing and modification	RNA processing and degradation, bacterial	3'-to-5' exoribonuclease RNase R	fig|28198.16.peg.1953	yes	fig|367737.4.peg.230	yes
A and B	RNA Metabolism	RNA processing and modification	RNA processing and degradation, bacterial	3'-to-5' oligoribonuclease B, Bacillus type	fig|28198.16.peg.821,fig|28198.16.peg.823	yes	fig|367737.4.peg.365	yes
A and B	RNA Metabolism	RNA processing and modification	RNA pseudouridine syntheses	FIG000124: Ribosomal large subunit pseudouridine synthase D (EC 4.2.1.70)	fig|28198.16.peg.655	yes	fig|367737.4.peg.1924	yes
A and B	RNA Metabolism	RNA processing and modification	RNA pseudouridine syntheses	Ribosomal large subunit pseudouridine synthase D (EC 4.2.1.70)	fig|28198.16.peg.390	yes	fig|367737.4.peg.989	yes
A and B	RNA Metabolism	RNA processing and modification	RNA pseudouridine syntheses	tRNA pseudouridine synthase A (EC 4.2.1.70)	fig|28198.16.peg.982	yes	fig|367737.4.peg.2139	yes
A and B	RNA Metabolism	RNA processing and modification	RNA pseudouridine syntheses	tRNA pseudouridine synthase B (EC 4.2.1.70)	fig|28198.16.peg.846	yes	fig|367737.4.peg.2028	yes
A and B	RNA Metabolism	RNA processing and modification	Ribonuclease H	Ribonuclease HI-related protein 2	fig|28198.16.peg.1128	yes	fig|367737.4.peg.1464	yes
A and B	RNA Metabolism	RNA processing and modification	Ribonuclease H	Ribonuclease HII (EC 3.1.26.4)	fig|28198.16.peg.1706	yes	fig|367737.4.peg.1600	yes
A	RNA Metabolism	RNA processing and modification	Queuosine-Archaeosine Biosynthesis	Permease of the drug/metabolite transporter (DMT) superfamily	fig|28198.16.peg.23,fig|28198.16.peg.732,fig|28198.16.peg.934	yes		no
A	RNA Metabolism	RNA processing and modification	RNA methylation	LSU m3Psi1915 methyltransferase RlmH	fig|28198.16.peg.1306	yes		no
A	RNA Metabolism	RNA processing and modification	RNA pseudouridine syntheses	Ribosomal large subunit pseudouridine synthase B (EC 4.2.1.70)	fig|28198.16.peg.642	yes		no
A	RNA Metabolism	RNA processing and modification	RNA pseudouridine syntheses	Ribosomal small subunit pseudouridine synthase A (EC 4.2.1.70)	fig|28198.16.peg.874	yes		no
B	RNA Metabolism	RNA processing and modification	16S rRNA modification within P site of ribosome	2-dehydropantoate 2-reductase (EC 1.1.1.169)		no	fig|367737.4.peg.2082	yes
B	RNA Metabolism	RNA processing and modification	ATP-dependent RNA helicases, bacterial	Cold-shock DEAD-box protein A		no	fig|367737.4.peg.42	yes
B	RNA Metabolism	RNA processing and modification	Queuosine-Archaeosine Biosynthesis	NADPH-dependent 7-cyano-7-deazaguanine reductase (EC 1.7.1.-)		no	fig|367737.4.peg.5	yes
B	RNA Metabolism	RNA processing and modification	RNA methylation	16S rRNA (guanine(966)-N(2))-methyltransferase (EC 2.1.1.171)		no	fig|367737.4.peg.877	yes
B	RNA Metabolism	RNA processing and modification	RNA processing and degradation, bacterial	FIG146085: 3-to-5 oligoribonuclease A, Bacillus type		no	fig|367737.4.peg.1982	yes
B	RNA Metabolism	RNA processing and modification	RNA processing and degradation, bacterial	Ribonuclease E inhibitor RraA		no	fig|367737.4.peg.357	yes
B	RNA Metabolism	RNA processing and modification	tRNA modification Archaea	Rhodanese-like domain required for thiamine synthesis		no	fig|367737.4.peg.1397	yes
B	RNA Metabolism	RNA processing and modification	tRNA modification Archaea	tRNA S(4)U 4-thiouridine synthase (former ThiI)		no	fig|367737.4.peg.1397	yes
B	RNA Metabolism	RNA processing and modification	tRNA nucleotidyltransferase	tRNA nucleotidyltransferase (EC 2.7.7.21) (EC 2.7.7.25)		no	fig|367737.4.peg.383	yes
A and B	RNA Metabolism	Transcription	RNA polymerase bacterial	DNA-directed RNA polymerase alpha subunit (EC 2.7.7.6)	fig|28198.16.peg.1111,fig|28198.16.peg.1112	yes	fig|367737.4.peg.1006	yes
A and B	RNA Metabolism	Transcription	RNA polymerase bacterial	DNA-directed RNA polymerase beta subunit (EC 2.7.7.6)	fig|28198.16.peg.465,fig|28198.16.peg.466,fig|28198.16.peg.1778	yes	fig|367737.4.peg.1844	yes
A and B	RNA Metabolism	Transcription	RNA polymerase bacterial	DNA-directed RNA polymerase beta' subunit (EC 2.7.7.6)	fig|28198.16.peg.467,fig|28198.16.peg.468,fig|28198.16.peg.469	yes	fig|367737.4.peg.1843	yes
A and B	RNA Metabolism	Transcription	Transcription factors bacterial	FIG000325: clustered with transcription termination protein NusA	fig|28198.16.peg.266	yes	fig|367737.4.peg.1990	yes
A and B	RNA Metabolism	Transcription	Transcription factors bacterial	Transcription accessory protein (S1 RNA-binding domain)	fig|28198.16.peg.1482	yes	fig|367737.4.peg.1962	yes
A and B	RNA Metabolism	Transcription	Transcription factors bacterial	Transcription antitermination protein NusG	fig|28198.16.peg.460	yes	fig|367737.4.peg.1849	yes
A and B	RNA Metabolism	Transcription	Transcription factors bacterial	Transcription termination protein NusA	fig|28198.16.peg.1640	yes	fig|367737.4.peg.238	yes
A and B	RNA Metabolism	Transcription	Transcription factors bacterial	Transcription termination protein NusB	fig|28198.16.peg.1158	yes	fig|367737.4.peg.1815	yes
A and B	RNA Metabolism	Transcription	Transcription factors bacterial	Transcription-repair coupling factor	fig|28198.16.peg.907	yes	fig|367737.4.peg.402	yes
A and B	RNA Metabolism	Transcription	Transcription initiation, bacterial sigma factors	RNA polymerase sigma factor RpoD	fig|28198.16.peg.1295,fig|28198.16.peg.1296	yes	fig|367737.4.peg.997	yes
B	RNA Metabolism	Transcription	RNA polymerase bacterial	DNA-directed RNA polymerase omega subunit (EC 2.7.7.6)		no	fig|367737.4.peg.633	yes
B	RNA Metabolism	Transcription	Transcription factors bacterial	Transcription elongation factor GreA		no	fig|367737.4.peg.606	yes
B	RNA Metabolism	Transcription	Transcription factors bacterial	Transcription termination factor Rho		no	fig|367737.4.peg.281	yes
A	Regulation and Cell signaling	Programmed Cell Death and Toxin-antitoxin Systems	Phd-Doc, YdcE-YdcD toxin-antitoxin (programmed cell death) systems	Death on curing protein, Doc toxin	fig|28198.16.peg.294,fig|28198.16.peg.1355	yes		no
A	Regulation and Cell signaling	Programmed Cell Death and Toxin-antitoxin Systems	Phd-Doc, YdcE-YdcD toxin-antitoxin (programmed cell death) systems	Programmed cell death toxin YdcE	fig|28198.16.peg.1910	yes		no
A	Regulation and Cell signaling	Programmed Cell Death and Toxin-antitoxin Systems	Toxin-antitoxin replicon stabilization systems	RelB/StbD replicon stabilization protein (antitoxin to RelE/StbE)	fig|28198.16.peg.951,fig|28198.16.peg.1773	yes		no
A	Regulation and Cell signaling	Programmed Cell Death and Toxin-antitoxin Systems	Toxin-antitoxin replicon stabilization systems	YoeB toxin protein	fig|28198.16.peg.1801	yes		no
B	Regulation and Cell signaling	Programmed Cell Death and Toxin-antitoxin Systems	Murein hydrolase regulation and cell death	Antiholin-like protein LrgA		no	fig|367737.4.peg.175	yes
B	Regulation and Cell signaling	Programmed Cell Death and Toxin-antitoxin Systems	Murein hydrolase regulation and cell death	LrgA-associated membrane protein LrgB		no	fig|367737.4.peg.176	yes
A and B	Regulation and Cell signaling	no subcategory	Stringent Response, (p)ppGpp metabolism	GTP pyrophosphokinase (EC 2.7.6.5), (p)ppGpp synthetase II	fig|28198.16.peg.595,fig|28198.16.peg.596	yes	fig|367737.4.peg.632	yes
A and B	Regulation and Cell signaling	no subcategory	Stringent Response, (p)ppGpp metabolism	Guanosine-3',5'-bis(diphosphate) 3'-pyrophosphohydrolase (EC 3.1.7.2)	fig|28198.16.peg.595,fig|28198.16.peg.596	yes	fig|367737.4.peg.632	yes
A	Regulation and Cell signaling	no subcategory	BOX elements in Streptococci	BOX elements	fig|28198.16.peg.1379	yes		no
A	Regulation and Cell signaling	no subcategory	LysR-family proteins in Escherichia coli	Chromosome initiation inhibitor	fig|28198.16.peg.844,fig|28198.16.peg.1486,fig|28198.16.peg.1904	yes		no
B	Regulation and Cell signaling	no subcategory	cAMP signaling in bacteria	Adenylate cyclase (EC 4.6.1.1)		no	fig|367737.4.peg.913	yes
A and B	Regulons	Atomic Regulons	ar-104-EC Molybdenum cofactor biosynthesis moaABCDE	Molybdenum cofactor biosynthesis protein MoaA	fig|28198.16.peg.826	yes	fig|367737.4.peg.362	yes
A and B	Regulons	Atomic Regulons	ar-104-EC Molybdenum cofactor biosynthesis moaABCDE	Molybdenum cofactor biosynthesis protein MoaC	fig|28198.16.peg.1357	yes	fig|367737.4.peg.2207	yes
A and B	Regulons	Atomic Regulons	ar-104-EC Molybdenum cofactor biosynthesis moaABCDE	Molybdenum cofactor biosynthesis protein MoaD	fig|28198.16.peg.1659	yes	fig|367737.4.peg.1861	yes
A and B	Regulons	Atomic Regulons	ar-104-EC Molybdenum cofactor biosynthesis moaABCDE	Molybdenum cofactor biosynthesis protein MoaE	fig|28198.16.peg.1660	yes	fig|367737.4.peg.1860	yes
A and B	Regulons	Atomic Regulons	ar-431-EC Molybdopterin-guanine dinucleotide biosynthesis	Molybdopterin-guanine dinucleotide biosynthesis protein MobA	fig|28198.16.peg.765,fig|28198.16.peg.1822	yes	fig|367737.4.peg.78	yes
A and B	Regulons	Atomic Regulons	ar-431-EC Molybdopterin-guanine dinucleotide biosynthesis	Molybdopterin-guanine dinucleotide biosynthesis protein MobB	fig|28198.16.peg.151	yes	fig|367737.4.peg.1204	yes
B	Respiration	ATP synthases	F0F1-type ATP synthase	ATP synthase F0 sector subunit a (EC 3.6.3.14)		no	fig|367737.4.peg.1975	yes
B	Respiration	ATP synthases	F0F1-type ATP synthase	ATP synthase F0 sector subunit b' (EC 3.6.3.14)		no	fig|367737.4.peg.2273	yes
B	Respiration	ATP synthases	F0F1-type ATP synthase	ATP synthase F0 sector subunit c (EC 3.6.3.14)		no	fig|367737.4.peg.1721	yes
B	Respiration	ATP synthases	F0F1-type ATP synthase	ATP synthase protein I		no	fig|367737.4.peg.994	yes
A and B	Respiration	Electron accepting reactions	Anaerobic respiratory reductases	Arsenate reductase (EC 1.20.4.1)	fig|28198.16.peg.1326,fig|28198.16.peg.1625,fig|28198.16.peg.1964	yes	fig|367737.4.peg.1362,fig|367737.4.peg.1883,fig|367737.4.peg.220	yes
B	Respiration	Electron accepting reactions	Terminal cytochrome d ubiquinol oxidases	Cytochrome d ubiquinol oxidase subunit I (EC 1.10.3.-)		no	fig|367737.4.peg.1077	yes
A and B	Respiration	Electron donating reactions	NiFe hydrogenase maturation	[NiFe] hydrogenase metallocenter assembly protein HypC	fig|28198.16.peg.1499	yes	fig|367737.4.peg.1385	yes
A and B	Respiration	Electron donating reactions	NiFe hydrogenase maturation	[NiFe] hydrogenase metallocenter assembly protein HypD	fig|28198.16.peg.1498	yes	fig|367737.4.peg.1384	yes
A and B	Respiration	Electron donating reactions	NiFe hydrogenase maturation	[NiFe] hydrogenase metallocenter assembly protein HypE	fig|28198.16.peg.1496	yes	fig|367737.4.peg.1379	yes
A and B	Respiration	Electron donating reactions	NiFe hydrogenase maturation	[NiFe] hydrogenase nickel incorporation protein HypA	fig|28198.16.peg.1495	yes	fig|367737.4.peg.1378	yes
A and B	Respiration	Electron donating reactions	NiFe hydrogenase maturation	[NiFe] hydrogenase nickel incorporation-associated protein HypB	fig|28198.16.peg.1500	yes	fig|367737.4.peg.1386	yes
A and B	Respiration	Electron donating reactions	Respiratory Complex I	NADH-ubiquinone oxidoreductase chain E (EC 1.6.5.3)	fig|28198.16.peg.915	yes	fig|367737.4.peg.26,fig|367737.4.peg.305	yes
A and B	Respiration	Electron donating reactions	Respiratory Complex I	NADH-ubiquinone oxidoreductase chain G (EC 1.6.5.3)	fig|28198.16.peg.394	yes	fig|367737.4.peg.302	yes
A and B	Respiration	Electron donating reactions	Respiratory Complex I	NADH-ubiquinone oxidoreductase chain J (EC 1.6.5.3)	fig|28198.16.peg.397	yes	fig|367737.4.peg.299	yes
A and B	Respiration	Electron donating reactions	Respiratory Complex I	NADH-ubiquinone oxidoreductase chain K (EC 1.6.5.3)	fig|28198.16.peg.398	yes	fig|367737.4.peg.298	yes
A and B	Respiration	Electron donating reactions	Respiratory Complex I	NADH-ubiquinone oxidoreductase chain L (EC 1.6.5.3)	fig|28198.16.peg.399,fig|28198.16.peg.1901	yes	fig|367737.4.peg.297	yes
A and B	Respiration	Electron donating reactions	Respiratory Complex I	NADH-ubiquinone oxidoreductase chain M (EC 1.6.5.3)	fig|28198.16.peg.118,fig|28198.16.peg.400,fig|28198.16.peg.401	yes	fig|367737.4.peg.296	yes
A and B	Respiration	Electron donating reactions	Respiratory Complex I	NADH-ubiquinone oxidoreductase chain N (EC 1.6.5.3)	fig|28198.16.peg.402	yes	fig|367737.4.peg.295	yes
A and B	Respiration	Electron donating reactions	Succinate dehydrogenase	Fumarate reductase cytochrome b subunit	fig|28198.16.peg.1673	yes	fig|367737.4.peg.294	yes
A and B	Respiration	Electron donating reactions	Succinate dehydrogenase	Succinate dehydrogenase flavoprotein subunit (EC 1.3.99.1)	fig|28198.16.peg.403,fig|28198.16.peg.404	yes	fig|367737.4.peg.293	yes
A and B	Respiration	Electron donating reactions	Succinate dehydrogenase	Succinate dehydrogenase iron-sulfur protein (EC 1.3.99.1)	fig|28198.16.peg.405	yes	fig|367737.4.peg.292	yes
A	Respiration	Electron donating reactions	Respiratory Complex I	NADH-ubiquinone oxidoreductase chain C (EC 1.6.5.3)	fig|28198.16.peg.916,fig|28198.16.peg.1849	yes		no
A	Respiration	Electron donating reactions	Respiratory Complex I	NADH-ubiquinone oxidoreductase chain H (EC 1.6.5.3)	fig|28198.16.peg.395,fig|28198.16.peg.396	yes		no
B	Respiration	Electron donating reactions	Respiratory Complex I	NADH ubiquinone oxidoreductase chain A (EC 1.6.5.3)		no	fig|367737.4.peg.308	yes
B	Respiration	Electron donating reactions	Respiratory Complex I	NADH-ubiquinone oxidoreductase chain B (EC 1.6.5.3)		no	fig|367737.4.peg.307	yes
B	Respiration	Electron donating reactions	Respiratory Complex I	NADH-ubiquinone oxidoreductase chain F (EC 1.6.5.3)		no	fig|367737.4.peg.304	yes
B	Respiration	Electron donating reactions	Respiratory Complex I	NADH-ubiquinone oxidoreductase chain I (EC 1.6.5.3)		no	fig|367737.4.peg.300	yes
B	Respiration	Sodium Ion-Coupled Energetics	Na+ translocating decarboxylases and related biotin-dependent enzymes	Oxaloacetate decarboxylase alpha chain (EC 4.1.1.3)		no	fig|367737.4.peg.1211	yes
A and B	Respiration	no subcategory	Biogenesis of c-type cytochromes	Cytochrome c-type biogenesis protein DsbD, protein-disulfide reductase (EC 1.8.1.8)	fig|28198.16.peg.444	yes	fig|367737.4.peg.2127	yes
A and B	Respiration	no subcategory	Biogenesis of c-type cytochromes	Putative cytochrome C-type biogenesis protein	fig|28198.16.peg.80	yes	fig|367737.4.peg.1285,fig|367737.4.peg.339	yes
A and B	Respiration	no subcategory	Formate hydrogenase	Formate dehydrogenase chain D (EC 1.2.1.2)	fig|28198.16.peg.705	yes	fig|367737.4.peg.1471	yes
A and B	Respiration	no subcategory	Formate hydrogenase	Formate dehydrogenase-O, iron-sulfur subunit (EC 1.2.1.2)	fig|28198.16.peg.707	yes	fig|367737.4.peg.1473,fig|367737.4.peg.1486	yes
A and B	Respiration	no subcategory	Formate hydrogenase	Formate dehydrogenase-O, major subunit (EC 1.2.1.2)	fig|28198.16.peg.708,fig|28198.16.peg.709,fig|28198.16.peg.710,fig|28198.16.peg.711,fig|28198.16.peg.712	yes	fig|367737.4.peg.1474,fig|367737.4.peg.1487	yes
A and B	Respiration	no subcategory	Formate hydrogenase	Putative formate dehydrogenase iron-sulfur subunit (EC 1.2.1.2)	fig|28198.16.peg.707	yes	fig|367737.4.peg.1473,fig|367737.4.peg.1486	yes
A and B	Respiration	no subcategory	Formate hydrogenase	Putative formate dehydrogenase, cytochrome B subunit (EC 1.2.1.2)	fig|28198.16.peg.706	yes	fig|367737.4.peg.1472	yes
A and B	Respiration	no subcategory	Formate hydrogenase	Putative formate dehydrogenase-specific chaperone	fig|28198.16.peg.714	yes	fig|367737.4.peg.1476	yes
A and B	Respiration	no subcategory	Soluble cytochromes and functionally related electron carriers	Ferredoxin	fig|28198.16.peg.200,fig|28198.16.peg.414	yes	fig|367737.4.peg.1793,fig|367737.4.peg.2173,fig|367737.4.peg.283	yes
A	Respiration	no subcategory	Biogenesis of cbb3-type cytochrome c oxidases	Type cbb3 cytochrome oxidase biogenesis protein CcoG, involved in Cu oxidation	fig|28198.16.peg.286	yes		no
B	Respiration	no subcategory	Biogenesis of cbb3-type cytochrome c oxidases	Cytochrome c oxidase subunit CcoO (EC 1.9.3.1)		no	fig|367737.4.peg.2024	yes
A and B	Secondary Metabolism	Plant Hormones	Auxin biosynthesis	Anthranilate phosphoribosyltransferase (EC 2.4.2.18)	fig|28198.16.peg.104,fig|28198.16.peg.827	yes	fig|367737.4.peg.1257	yes
A and B	Secondary Metabolism	Plant Hormones	Auxin biosynthesis	Phosphoribosylanthranilate isomerase (EC 5.3.1.24)	fig|28198.16.peg.778	yes	fig|367737.4.peg.843	yes
A and B	Secondary Metabolism	Plant Hormones	Auxin biosynthesis	Tryptophan synthase alpha chain (EC 4.2.1.20)	fig|28198.16.peg.999	yes	fig|367737.4.peg.1747	yes
A and B	Secondary Metabolism	Plant Hormones	Auxin biosynthesis	Tryptophan synthase beta chain (EC 4.2.1.20)	fig|28198.16.peg.239	yes	fig|367737.4.peg.686	yes
A and B	Stress Response	Cold shock	Cold shock, CspA family of proteins	Cold shock protein CspA	fig|28198.16.peg.547,fig|28198.16.peg.784	yes	fig|367737.4.peg.1832	yes
A	Stress Response	Osmotic stress	Ectoine biosynthesis and regulation	Diaminobutyrate-pyruvate aminotransferase (EC 2.6.1.46)	fig|28198.16.peg.1719	yes		no
A	Stress Response	Osmotic stress	Ectoine biosynthesis and regulation	L-ectoine synthase (EC 4.2.1.-)	fig|28198.16.peg.1720	yes		no
A	Stress Response	Osmotic stress	Osmoregulation	Outer membrane protein A precursor	fig|28198.16.peg.1443	yes		no
B	Stress Response	Osmotic stress	Synthesis of osmoregulated periplasmic glucans	Phosphoglycerol transferase I (EC 2.7.8.20)		no	fig|367737.4.peg.1767	yes
A and B	Stress Response	Oxidative stress	Glutathione: Non-redox reactions	Hydroxyacylglutathione hydrolase (EC 3.1.2.6)	fig|28198.16.peg.74,fig|28198.16.peg.1711	yes	fig|367737.4.peg.1280	yes
A and B	Stress Response	Oxidative stress	Oxidative stress	Catalase (EC 1.11.1.6)	fig|28198.16.peg.928	yes	fig|367737.4.peg.1519	yes
A and B	Stress Response	Oxidative stress	Oxidative stress	Fe2+/Zn2+ uptake regulation proteins	fig|28198.16.peg.1542	yes	fig|367737.4.peg.864	yes
A and B	Stress Response	Oxidative stress	Oxidative stress	Ferric uptake regulation protein	fig|28198.16.peg.230,fig|28198.16.peg.1542	yes	fig|367737.4.peg.1713,fig|367737.4.peg.864	yes
A and B	Stress Response	Oxidative stress	Oxidative stress	Ferric uptake regulation protein FUR	fig|28198.16.peg.1004	yes	fig|367737.4.peg.1744,fig|367737.4.peg.705	yes
A and B	Stress Response	Oxidative stress	Oxidative stress	NnrS protein involved in response to NO	fig|28198.16.peg.516,fig|28198.16.peg.1184,fig|28198.16.peg.1597,fig|28198.16.peg.1884	yes	fig|367737.4.peg.1943,fig|367737.4.peg.547	yes
A and B	Stress Response	Oxidative stress	Oxidative stress	Paraquat-inducible protein A	fig|28198.16.peg.929,fig|28198.16.peg.930,fig|28198.16.peg.931,fig|28198.16.peg.1963	yes	fig|367737.4.peg.1523,fig|367737.4.peg.1524	yes
A and B	Stress Response	Oxidative stress	Oxidative stress	Peroxide stress regulator	fig|28198.16.peg.230,fig|28198.16.peg.1542	yes	fig|367737.4.peg.1713,fig|367737.4.peg.864	yes
A and B	Stress Response	Oxidative stress	Oxidative stress	transcriptional regulator, Crp/Fnr family	fig|28198.16.peg.894	yes	fig|367737.4.peg.2085	yes
A and B	Stress Response	Oxidative stress	Protection from Reactive Oxygen Species	Catalase (EC 1.11.1.6)	fig|28198.16.peg.928	yes	fig|367737.4.peg.1519	yes
A and B	Stress Response	Oxidative stress	Protection from Reactive Oxygen Species	Cytochrome c551 peroxidase (EC 1.11.1.5)	fig|28198.16.peg.1567	yes	fig|367737.4.peg.2080,fig|367737.4.peg.870	yes
A	Stress Response	Oxidative stress	Glutathionylspermidine and Trypanothione	Similarity with glutathionylspermidine synthase (EC 6.3.1.8), group 2	fig|28198.16.peg.1728	yes		no
A	Stress Response	Oxidative stress	Rubrerythrin	Rubredoxin	fig|28198.16.peg.994	yes		no
B	Stress Response	Oxidative stress	Oxidative stress	Alkyl hydroperoxide reductase subunit C-like protein		no	fig|367737.4.peg.1840,fig|367737.4.peg.282	yes
B	Stress Response	Oxidative stress	Oxidative stress	Peroxidase (EC 1.11.1.7)		no	fig|367737.4.peg.1519	yes
B	Stress Response	Oxidative stress	Oxidative stress	Superoxide dismutase [Fe] (EC 1.15.1.1)		no	fig|367737.4.peg.1549	yes
A and B	Stress Response	Periplasmic Stress	Periplasmic Stress Response	HtrA protease/chaperone protein	fig|28198.16.peg.501	yes	fig|367737.4.peg.2043	yes
A and B	Stress Response	no subcategory	Carbon Starvation	Carbon starvation protein A	fig|28198.16.peg.1526	yes	fig|367737.4.peg.720	yes
A and B	Sulfur Metabolism	no subcategory	Sulfur oxidation	Sulfur oxidation molybdopterin C protein	fig|28198.16.peg.367,fig|28198.16.peg.1835	yes	fig|367737.4.peg.552	yes
A and B	Sulfur Metabolism	no subcategory	Sulfur oxidation	Sulfur oxidation protein SoxB	fig|28198.16.peg.375,fig|28198.16.peg.376	yes	fig|367737.4.peg.559	yes
A and B	Sulfur Metabolism	no subcategory	Sulfur oxidation	Sulfur oxidation protein SoxX	fig|28198.16.peg.370	yes	fig|367737.4.peg.554	yes
A and B	Sulfur Metabolism	no subcategory	Sulfur oxidation	Sulfur oxidation protein SoxY	fig|28198.16.peg.371	yes	fig|367737.4.peg.555	yes
A and B	Sulfur Metabolism	no subcategory	Sulfur oxidation	Sulfur oxidation protein SoxZ	fig|28198.16.peg.372	yes	fig|367737.4.peg.556	yes
A and B	Sulfur Metabolism	no subcategory	Sulfur oxidation	sulfur oxidation protein SoxA	fig|28198.16.peg.373	yes	fig|367737.4.peg.557	yes
A and B	Sulfur Metabolism	no subcategory	Thioredoxin-disulfide reductase	Thiol peroxidase, Bcp-type (EC 1.11.1.15)	fig|28198.16.peg.219	yes	fig|367737.4.peg.1806	yes
A and B	Sulfur Metabolism	no subcategory	Thioredoxin-disulfide reductase	Thiol peroxidase, Tpx-type (EC 1.11.1.15)	fig|28198.16.peg.1186	yes	fig|367737.4.peg.544	yes
A and B	Sulfur Metabolism	no subcategory	Thioredoxin-disulfide reductase	Thioredoxin reductase (EC 1.8.1.9)	fig|28198.16.peg.562,fig|28198.16.peg.840,fig|28198.16.peg.1817	yes	fig|367737.4.peg.2034	yes
A	Sulfur Metabolism	no subcategory	Sulfur oxidation	Sulfide dehydrogenase [flavocytochrome C] flavoprotein chain precursor (EC 1.8.2.-)	fig|28198.16.peg.863	yes		no
A	Sulfur Metabolism	no subcategory	Sulfur oxidation	thioredoxin SoxW	fig|28198.16.peg.287	yes		no
A and B	Virulence, Disease and Defense	Invasion and intracellular resistance	Mycobacterium virulence operon involved in DNA transcription	DNA-directed RNA polymerase beta subunit (EC 2.7.7.6)	fig|28198.16.peg.465,fig|28198.16.peg.466,fig|28198.16.peg.1778	yes	fig|367737.4.peg.1844	yes
A and B	Virulence, Disease and Defense	Invasion and intracellular resistance	Mycobacterium virulence operon involved in DNA transcription	DNA-directed RNA polymerase beta' subunit (EC 2.7.7.6)	fig|28198.16.peg.467,fig|28198.16.peg.468,fig|28198.16.peg.469	yes	fig|367737.4.peg.1843	yes
A and B	Virulence, Disease and Defense	Invasion and intracellular resistance	Mycobacterium virulence operon involved in an unknown function with a Jag Protein and YidC and YidD	Inner membrane protein translocase component YidC, long form	fig|28198.16.peg.834,fig|28198.16.peg.835	yes	fig|367737.4.peg.1595	yes
A and B	Virulence, Disease and Defense	Invasion and intracellular resistance	Mycobacterium virulence operon involved in an unknown function with a Jag Protein and YidC and YidD	RNA-binding protein Jag	fig|28198.16.peg.833	yes	fig|367737.4.peg.1594	yes
A and B	Virulence, Disease and Defense	Invasion and intracellular resistance	Mycobacterium virulence operon involved in protein synthesis (LSU ribosomal proteins)	LSU ribosomal protein L20p	fig|28198.16.peg.760	yes	fig|367737.4.peg.74	yes
A and B	Virulence, Disease and Defense	Invasion and intracellular resistance	Mycobacterium virulence operon involved in protein synthesis (LSU ribosomal proteins)	LSU ribosomal protein L35p	fig|28198.16.peg.759	yes	fig|367737.4.peg.73	yes
A and B	Virulence, Disease and Defense	Invasion and intracellular resistance	Mycobacterium virulence operon involved in protein synthesis (LSU ribosomal proteins)	Translation initiation factor 3	fig|28198.16.peg.758	yes	fig|367737.4.peg.72	yes
A and B	Virulence, Disease and Defense	Invasion and intracellular resistance	Mycobacterium virulence operon involved in protein synthesis (SSU ribosomal proteins)	SSU ribosomal protein S12p (S23e)	fig|28198.16.peg.1243	yes	fig|367737.4.peg.1938	yes
A and B	Virulence, Disease and Defense	Invasion and intracellular resistance	Mycobacterium virulence operon involved in protein synthesis (SSU ribosomal proteins)	SSU ribosomal protein S7p (S5e)	fig|28198.16.peg.1244	yes	fig|367737.4.peg.1937	yes
A and B	Virulence, Disease and Defense	Invasion and intracellular resistance	Mycobacterium virulence operon involved in protein synthesis (SSU ribosomal proteins)	Translation elongation factor G	fig|28198.16.peg.1245,fig|28198.16.peg.1246	yes	fig|367737.4.peg.1936	yes
A and B	Virulence, Disease and Defense	Invasion and intracellular resistance	Mycobacterium virulence operon involved in protein synthesis (SSU ribosomal proteins)	Translation elongation factor Tu	fig|28198.16.peg.457	yes	fig|367737.4.peg.1852	yes
A and B	Virulence, Disease and Defense	Invasion and intracellular resistance	Mycobacterium virulence operon possibly involved in quinolinate biosynthesis	L-aspartate oxidase (EC 1.4.3.16)	fig|28198.16.peg.946	yes	fig|367737.4.peg.907	yes
A and B	Virulence, Disease and Defense	Invasion and intracellular resistance	Mycobacterium virulence operon possibly involved in quinolinate biosynthesis	Quinolinate phosphoribosyltransferase [decarboxylating] (EC 2.4.2.19)	fig|28198.16.peg.255	yes	fig|367737.4.peg.1981	yes
A and B	Virulence, Disease and Defense	Invasion and intracellular resistance	Mycobacterium virulence operon possibly involved in quinolinate biosynthesis	Quinolinate synthetase (EC 2.5.1.72)	fig|28198.16.peg.254	yes	fig|367737.4.peg.1980	yes
A and B	Virulence, Disease and Defense	Resistance to antibiotics and toxic compounds	Arsenic resistance	Arsenate reductase (EC 1.20.4.1)	fig|28198.16.peg.1326,fig|28198.16.peg.1625,fig|28198.16.peg.1964	yes	fig|367737.4.peg.1362,fig|367737.4.peg.1883,fig|367737.4.peg.220	yes
A and B	Virulence, Disease and Defense	Resistance to antibiotics and toxic compounds	Arsenic resistance	Arsenic efflux pump protein	fig|28198.16.peg.1714,fig|28198.16.peg.1959	yes	fig|367737.4.peg.1879	yes
A and B	Virulence, Disease and Defense	Resistance to antibiotics and toxic compounds	Arsenic resistance	Arsenical resistance operon repressor	fig|28198.16.peg.1715	yes	fig|367737.4.peg.1880	yes
A and B	Virulence, Disease and Defense	Resistance to antibiotics and toxic compounds	Beta-lactamase	Beta-lactamase (EC 3.5.2.6)	fig|28198.16.peg.1436	yes	fig|367737.4.peg.1454	yes
A and B	Virulence, Disease and Defense	Resistance to antibiotics and toxic compounds	Cobalt-zinc-cadmium resistance	Cadmium-transporting ATPase (EC 3.6.3.3)	fig|28198.16.peg.1009,fig|28198.16.peg.1435	yes	fig|367737.4.peg.1825	yes
A and B	Virulence, Disease and Defense	Resistance to antibiotics and toxic compounds	Cobalt-zinc-cadmium resistance	Cation efflux system protein CusA	fig|28198.16.peg.1012,fig|28198.16.peg.1798	yes	fig|367737.4.peg.65	yes
A and B	Virulence, Disease and Defense	Resistance to antibiotics and toxic compounds	Cobalt-zinc-cadmium resistance	Cobalt-zinc-cadmium resistance protein	fig|28198.16.peg.1228,fig|28198.16.peg.1830	yes	fig|367737.4.peg.488,fig|367737.4.peg.911	yes
A and B	Virulence, Disease and Defense	Resistance to antibiotics and toxic compounds	Cobalt-zinc-cadmium resistance	Cobalt-zinc-cadmium resistance protein CzcA	fig|28198.16.peg.1012,fig|28198.16.peg.1798	yes	fig|367737.4.peg.65	yes
A and B	Virulence, Disease and Defense	Resistance to antibiotics and toxic compounds	Cobalt-zinc-cadmium resistance	Cobalt-zinc-cadmium resistance protein CzcD	fig|28198.16.peg.1403	yes	fig|367737.4.peg.337	yes
A and B	Virulence, Disease and Defense	Resistance to antibiotics and toxic compounds	Cobalt-zinc-cadmium resistance	Heavy metal RND efflux outer membrane protein, CzcC family	fig|28198.16.peg.624,fig|28198.16.peg.1014	yes	fig|367737.4.peg.63	yes
A and B	Virulence, Disease and Defense	Resistance to antibiotics and toxic compounds	Copper homeostasis	Copper-translocating P-type ATPase (EC 3.6.3.4)	fig|28198.16.peg.1612,fig|28198.16.peg.1809	yes	fig|367737.4.peg.473,fig|367737.4.peg.533	yes
A and B	Virulence, Disease and Defense	Resistance to antibiotics and toxic compounds	Copper homeostasis: copper tolerance	Periplasmic divalent cation tolerance protein CutA	fig|28198.16.peg.1555	yes	fig|367737.4.peg.166	yes
A and B	Virulence, Disease and Defense	Resistance to antibiotics and toxic compounds	Multidrug Resistance Efflux Pumps	Acriflavin resistance protein	fig|28198.16.peg.1147,fig|28198.16.peg.1148,fig|28198.16.peg.1649,fig|28198.16.peg.1650	yes	fig|367737.4.peg.1829	yes
A and B	Virulence, Disease and Defense	Resistance to antibiotics and toxic compounds	Multidrug Resistance Efflux Pumps	Macrolide export ATP-binding/permease protein MacB (EC 3.6.3.-)	fig|28198.16.peg.1707,fig|28198.16.peg.1708	yes	fig|367737.4.peg.695	yes
A and B	Virulence, Disease and Defense	Resistance to antibiotics and toxic compounds	Multidrug Resistance Efflux Pumps	RND efflux system, inner membrane transporter CmeB	fig|28198.16.peg.1250,fig|28198.16.peg.1440,fig|28198.16.peg.1767	yes	fig|367737.4.peg.2101,fig|367737.4.peg.2164,fig|367737.4.peg.801	yes
A and B	Virulence, Disease and Defense	Resistance to antibiotics and toxic compounds	Multidrug Resistance Efflux Pumps	RND efflux system, membrane fusion protein CmeA	fig|28198.16.peg.1251,fig|28198.16.peg.1651	yes	fig|367737.4.peg.2100,fig|367737.4.peg.2165,fig|367737.4.peg.454	yes
A and B	Virulence, Disease and Defense	Resistance to antibiotics and toxic compounds	Multidrug Resistance Efflux Pumps	RND efflux system, outer membrane lipoprotein CmeC	fig|28198.16.peg.1249	yes	fig|367737.4.peg.2102,fig|367737.4.peg.2163	yes
A and B	Virulence, Disease and Defense	Resistance to antibiotics and toxic compounds	Multidrug Resistance Efflux Pumps	Type I secretion outer membrane protein, TolC precursor	fig|28198.16.peg.1211	yes	fig|367737.4.peg.692	yes
A and B	Virulence, Disease and Defense	Resistance to antibiotics and toxic compounds	Resistance to fluoroquinolones	DNA gyrase subunit A (EC 5.99.1.3)	fig|28198.16.peg.1203,fig|28198.16.peg.1704,fig|28198.16.peg.1968	yes	fig|367737.4.peg.1757	yes
A and B	Virulence, Disease and Defense	Resistance to antibiotics and toxic compounds	Resistance to fluoroquinolones	DNA gyrase subunit B (EC 5.99.1.3)	fig|28198.16.peg.563,fig|28198.16.peg.1891	yes	fig|367737.4.peg.3	yes
A	Virulence, Disease and Defense	Resistance to antibiotics and toxic compounds	Cobalt-zinc-cadmium resistance	Probable Co/Zn/Cd efflux system membrane fusion protein	fig|28198.16.peg.1013	yes		no
A	Virulence, Disease and Defense	Resistance to antibiotics and toxic compounds	Copper homeostasis	CopG protein	fig|28198.16.peg.622	yes		no
A	Virulence, Disease and Defense	Resistance to antibiotics and toxic compounds	Copper homeostasis: copper tolerance	Membrane protein, suppressor for copper-sensitivity ScsD	fig|28198.16.peg.1146	yes		no
A	Virulence, Disease and Defense	Resistance to antibiotics and toxic compounds	Multidrug Resistance Efflux Pumps	Probable outer membrane component of multidrug efflux pump	fig|28198.16.peg.1652	yes		no
B	Virulence, Disease and Defense	Resistance to antibiotics and toxic compounds	Arsenic resistance	Arsenical-resistance protein ACR3		no	fig|367737.4.peg.546	yes
B	Virulence, Disease and Defense	Resistance to antibiotics and toxic compounds	Cadmium resistance	Cadmium efflux system accessory protein		no	fig|367737.4.peg.1826	yes
B	Virulence, Disease and Defense	Resistance to antibiotics and toxic compounds	Copper homeostasis	ErfK/YbiS/YcfS/YnhG family protein		no	fig|367737.4.peg.1694	yes
B	Virulence, Disease and Defense	Resistance to antibiotics and toxic compounds	Copper homeostasis: copper tolerance	Copper homeostasis protein CutE		no	fig|367737.4.peg.386	yes
B	Virulence, Disease and Defense	Resistance to antibiotics and toxic compounds	Multidrug Resistance Efflux Pumps	Macrolide-specific efflux protein MacA		no	fig|367737.4.peg.693	yes
