# Supplementary material for: Accumulation and expression of multiple antibiotic resistance genes in Arcobacter cryaerophilus that thrives in sewage
Source: PeerJ. 2017 Apr 25;5:e3269. doi: 10.7717/peerj.3269 (PMC5407278; doi:10.7717/peerj.3269)
Supplement: Data Set S5 [file peerj-05-3269-s006.xlsx]

## Sheet: Sheet1
Contig	Length	Total DNA Reads Mapped	Average Coverage
contig001	58740	761262	959.219
contig002	36499	468467	949.942
contig003	44472	542688	903.023
contig004	27966	363731	962.999
contig005	24031	340608	1049.53
contig006	23828	375254	1164.47
contig007	23738	494053	1539.23
contig008	23565	495770	1556.69
contig009	23393	442481	1398.03
contig010	23333	312001	990.345
contig011	21416	320854	1108.42
contig012	21336	451499	1566.36
contig013	19605	373945	1412.89
contig014	19442	366760	1395.73
contig015	19380	353620	1348.57
contig016	19098	360591	1397.51
contig017	18225	263770	1070.23
contig018	17229	255292	1095.26
contig019	17193	337980	1456.03
contig020	17167	313394	1351.15
contig021	16472	278310	1250.57
contig022	16113	248502	1141.68
contig023	16054	333871	1538.75
contig024	15623	294300	1394.07
contig025	25840	271127	775.832
contig026	14882	226961	1127.64
contig027	14322	220044	1136.48
contig028	13745	255841	1376.1
contig029	13151	263273	1481
contig030	13009	177151	1007.24
contig031	12443	210306	1250.93
contig032	12440	141474	841.916
contig033	19601	320051	1208.38
contig034	17172	300352	1292.69
contig035	12048	200259	1231.5
contig036	12019	136917	842.343
contig037	11855	240620	1500.92
contig038	11877	244550	1522.13
contig039	11622	210827	1343.16
contig040	11602	228544	1455.08
contig041	11058	155381	1039.76
contig042	10962	115030	775.797
contig043	10569	125358	878.788
contig044	10525	140519	987.166
contig045	10410	167387	1189.75
contig046	10380	189853	1354.37
contig047	10361	158015	1127.41
contig048	10345	164410	1173.89
contig049	10087	168438	1236.16
contig050	10025	217382	1606.27
contig051	9816	233035	1755.66
contig052	9560	128242	992.027
contig053	9264	167012	1333.88
contig054	9175	134259	1084.56
contig055	9007	122513	1007.13
contig056	8660	168612	1441.28
contig057	14249	182934	950.598
contig058	8633	132304	1134.96
contig059	8550	118000	1021.81
contig060	8407	152711	1344.43
contig061	8405	114962	1013.74
contig062	9221	140931	1130.79
contig063	8213	148961	1342.87
contig064	8052	464813	4285.69
contig065	7731	132741	1271.97
contig066	8283	138378	1237.29
contig067	7711	121611	1167.42
contig068	7568	317636	3103.14
contig069	7541	107475	1054.72
contig070	7506	140885	1387.88
contig071	7236	159614	1627.51
contig072	7231	149385	1527.89
contig073	7192	118808	1222.96
contig074	10301	134472	965.63
contig075	7037	159804	1678.45
contig076	7034	82634	869.298
contig077	6809	114611	1246.15
contig078	6787	138815	1510.29
contig079	7540	103018	1009.1
contig080	6672	87394	969.386
contig081	6651	131439	1463.28
contig082	6605	137049	1534.42
contig083	6435	140442	1611.56
contig084	6408	121727	1405.77
contig085	6269	52767	623.75
contig086	6147	87372	1053.28
contig087	6060	85736	1047.25
contig088	6028	104340	1280.46
contig089	5961	113911	1413.57
contig090	5917	142768	1732.07
contig091	6421	128381	1477.54
contig092	5708	85480	1111.04
contig093	5652	90601	1186.75
contig094	5626	67087	883.147
contig095	5392	58262	800.999
contig096	5344	83561	1155.29
contig097	5854	68298	863.013
contig098	5158	29035	416.301
contig099	5078	103807	1511.02
contig100	5053	99273	1451.84
contig101	5006	76981	1137.05
contig102	4965	81688	1220.55
contig103	10355	188587	1347.41
contig104	4904	67140	1012.71
contig105	4892	77612	1174.52
contig106	4843	100443	1533.97
contig107	4842	92815	1416.56
contig108	4757	51332	797.062
contig109	8534	77653	672.513
contig110	4652	58445	928.609
contig111	4546	70982	1156.42
contig112	4542	78711	1282.34
contig113	4448	54087	898.454
contig114	4434	99424	1657.82
contig115	4222	70351	1231.72
contig116	4221	72848	1275.55
contig117	4188	63861	1128.35
contig118	4171	51742	918.216
contig119	4111	41308	743.748
contig120	4110	85846	1541.15
contig121	4039	83159	1522.15
contig122	3980	54722	1016.02
contig123	3970	62652	1166.87
contig124	5132	57899	832.114
contig125	3902	93903	1778.98
contig126	3864	45301	867.001
contig127	3847	50957	978.628
contig128	3787	150486	2892.21
contig129	3776	93859	1839.99
contig130	3699	51400	1026.89
contig131	3596	24222	498.671
contig132	3584	39709	819.979
contig133	4360	37194	629.46
contig134	3536	46392	970.337
contig135	3419	55448	1200.37
contig136	3339	45260	1001.29
contig137	3284	26084	588.305
contig138	3261	58683	1330.51
contig139	3115	58984	1398.04
contig140	2997	57046	1397.7
contig141	2980	16011	397.56
contig142	2939	37709	946.124
contig143	2838	39526	1030.52
contig144	2896	71081	1817.31
contig145	2774	40160	1072.81
contig146	2762	57203	1534.43
contig147	2750	7606	204.54
contig148	2747	36894	995.995
contig149	2735	23565	638.162
contig150	2708	32513	886.754
contig151	2631	33374	938.603
contig152	2566	43450	1251.85
contig153	2561	15855	458.462
contig154	2523	28464	834.335
contig155	3253	25318	576.102
contig156	2480	4717	139.756
contig157	2466	14719	441.611
contig158	2415	19184	589.334
contig159	2414	38475	1177.13
contig160	2375	18702	581.06
contig161	2353	38305	1202.81
contig162	2331	16823	533.061
contig163	2285	34359	1108.68
contig164	2283	14364	464.901
contig165	2263	27979	915.582
contig166	2212	27563	921.654
contig167	2157	51877	1779.01
contig168	2149	29440	1011.97
contig169	2147	3778	129.857
contig170	2138	32253	1112.66
contig171	2136	38013	1316.08
contig172	2134	8570	298.417
contig173	2133	8794	303.345
contig174	2126	9222	320.405
contig175	2124	27891	969.95
contig176	2036	24791	901.49
contig177	2027	21672	792.098
contig178	3394	54632	1191.13
contig179	2021	4513	164.709
contig180	2015	10874	399.995
contig181	2004	19907	734.721
contig182	1947	24370	923.452
contig183	1937	29894	1140.15
contig184	1934	6883	263.212
contig185	1919	21021	810.588
contig186	1822	4571	185.523
contig187	1799	116814	4819.13
contig188	1790	6747	277.177
contig189	1785	5649	234.592
contig190	1764	24867	1043.18
contig191	1761	6083	256.161
contig192	1736	6276	267.646
contig193	1688	6962	304.62
contig194	1675	41276	1826.86
contig195	1660	12383	549.49
contig196	1647	18481	827.672
contig197	1625	22073	1004.65
contig198	1598	11946	553.598
contig199	1591	17398	807.964
contig200	1572	7928	372.214
contig201	1555	16529	785.695
contig202	1551	8317	395.569
contig203	1527	4623	224.133
contig204	1501	1688	83.5756
contig205	1490	2862	142.37
contig206	1471	20960	1055.18
contig207	1470	6349	319.752
contig208	1463	13584	686.52
contig209	1458	8411	426.249
contig210	1457	26861	1361.07
contig211	1450	26741	1366.03
contig212	1440	30631	1573
contig213	1439	19416	997.254
contig214	1406	6321	332.698
contig215	1378	68806	3655.99
contig216	15755	17376	81.4629
contig217	1343	2077	114.16
contig218	1343	3298	179.334
contig219	1342	10108	557.248
contig220	1315	18135	1020.32
contig221	1300	4520	257.287
contig222	1295	14952	854.914
contig223	14895	15976	79.2211
contig224	1294	4139	237.259
contig225	1287	2527	145.419
contig226	1285	23463	1348.49
contig227	1281	11528	663.977
contig228	1271	11377	661.619
contig229	1265	3846	225.221
contig230	1262	7878	461.243
contig231	1253	1334	78.4238
contig232	1253	3202	189.279
contig233	1251	4351	255.929
contig234	1249	19397	1146.98
contig235	1232	383	22.905
contig236	1228	3099	186.862
contig237	1224	5590	337.449
contig238	1223	28449	1724.24
contig239	1221	21602	1311.87
contig240	1194	1641	101.551
contig241	1181	1321	82.3124
contig242	1181	1948	121.593
contig243	1181	13024	812.799
contig244	1179	2139	133.578
contig245	1162	19083	1214.99
contig246	1162	8432	536.781
contig247	1159	3669	233.431
contig248	1148	13840	890.001
contig249	1147	9515	612.707
contig250	1147	12129	780.554
contig251	1138	6147	397.945
contig252	1115	1232	81.8152
contig253	1102	6900	464.223
contig254	1092	1749	117.775
contig255	1063	4614	319.929
contig256	1063	9448	659.108
contig257	1055	1156	80.6682
contig258	1055	3942	275.325
contig259	1055	9477	663.674
contig260	1054	5323	374.941
contig261	1052	3798	267.526
contig262	1048	14049	990.226
contig263	1038	3414	242.091
contig264	1025	2779	200.208
contig265	1015	3095	224.44
contig266	1003	9843	726.885
contig267	991	5756	429.508
contig268	986	10319	776.005
contig269	986	2888	217.085
contig270	964	1409	107.751
contig271	952	1166	89.8456
contig272	950	7962	617.669
contig273	949	1533	118.903
contig274	944	891	69.4492
contig275	942	1314	102.995
contig276	938	8421	663.555
contig277	931	1768	140.524
contig278	921	8365	671.26
contig279	907	13345	1088.51
contig280	904	4734	386.566
contig281	904	3499	285.331
contig282	904	1276	104.405
contig283	900	6854	561.743
contig284	882	1413	117.088
contig285	879	6995	587.41
contig286	871	8936	757.955
contig287	867	3234	274.33
contig288	859	3474	300.086
contig289	855	1134	98.2105
contig290	849	3051	265.773
contig291	844	1440	124.754
contig292	839	5836	513.803
contig293	834	5221	463.073
contig294	833	10872	967.379
contig295	831	4603	408.729
contig296	826	3839	340.091
contig297	825	1318	117.81
contig298	824	2067	186.286
contig299	821	2720	244.875
contig300	819	3635	326.924
contig301	1340	4230	232.291
contig302	807	1001	91.2838
contig303	803	6459	594.234
contig304	803	2380	218.279
contig305	802	7667	706.171
contig306	801	1916	177.17
contig307	800	3473	318.962
contig308	798	1977	183.803
contig309	10933	12086	81.6619
contig310	797	6421	593.353
contig311	797	611	56.6424
contig312	788	6473	604.494
contig313	787	1830	169.186
contig314	785	5446	511.303
contig315	783	2334	220.571
contig316	774	3784	362.173
contig317	774	1146	108.851
contig318	773	2904	277.811
contig319	767	3611	348.927
contig320	759	1602	154.931
contig321	759	999	97.253
contig322	757	793	77.2629
contig323	756	780	76.1812
contig324	755	977	95.3934
contig325	751	952	93.4048
contig326	740	583	58.2878
contig327	740	6569	656.357
contig328	740	931	92.4919
contig329	738	973	97.6978
contig330	736	2076	208.397
contig331	734	5379	540.614
contig332	733	744	74.6944
contig333	733	4554	459.767
contig334	729	5725	578.547
contig335	725	6414	651.006
contig336	722	951	97.7188
contig337	716	3761	388.911
contig338	714	3931	405.396
contig339	1360	3557	192.156
contig340	711	666	69.0309
contig341	710	2211	229.904
contig342	709	3010	313.262
contig343	706	3491	363.758
contig344	705	657	68.8553
contig345	700	2667	281.147
contig346	690	14491	1552.49
contig347	688	6755	719.321
contig348	688	693	74.5959
contig349	688	2998	321.656
contig350	686	5270	564.961
contig351	684	1194	128.401
contig352	681	2314	248.805
contig353	681	1631	176.825
contig354	680	3662	396.588
contig355	676	862	93.571
contig356	675	7457	815.985
contig357	673	1394	151.456
contig358	673	620	67.8306
contig359	673	2146	235.435
contig360	670	1270	140.278
contig361	669	1509	166.453
contig362	667	1052	116.523
contig363	662	3385	377.776
contig364	662	2841	317.216
contig365	658	5462	614.426
contig366	656	860	97.0777
contig367	654	11598	1310.84
contig368	650	1008	114.715
contig369	648	8857	1011.59
contig370	646	1018	116.652
contig371	643	2937	336.972
contig372	642	2814	323.215
contig373	641	946	107.089
contig374	640	778	89.6703
contig375	638	2988	347.047
contig376	632	3219	374.907
contig377	632	4626	541.508
contig378	13872	15020	80.0823
contig379	628	1772	207.914
contig380	626	732	86.4425
contig381	626	744	87.8003
contig382	623	898	106.602
contig383	622	819	96.3987
contig384	617	1937	232.225
contig385	616	1094	131.256
contig386	615	1632	194.969
contig387	613	2337	281.688
contig388	610	2825	341.472
contig389	607	1071	129.339
contig390	607	2146	261.102
contig391	606	824	100.101
contig392	606	3594	439.046
contig393	605	674	82.1719
contig394	604	4719	576.987
contig395	599	2128	262.823
contig396	597	663	81.603
contig397	597	1885	233.767
contig398	596	2438	300.512
contig399	591	1316	164.21
contig400	589	662	82.2428
contig401	584	443	55.6524
contig402	581	2233	282.411
contig403	580	3564	451.829
contig404	580	660	83.7828
contig405	578	979	124.799
contig406	577	1090	139.263
contig407	577	3041	389.757
contig408	577	2023	258.128
contig409	577	1708	206.78
contig410	576	4885	620.562
contig411	575	707	90.3339
contig412	574	1015	131.028
contig413	574	1527	197.174
contig414	572	2690	347.42
contig415	572	697	89.1888
contig416	569	2126	275.466
contig417	569	2533	323.357
contig418	569	1431	186.091
contig419	566	1049	136.788
contig420	566	594	77.4223
contig421	564	1495	195.181
contig422	561	839	110.492
contig423	560	1126	148.854
contig424	559	868	114.642
contig425	558	1595	211.552
contig426	556	2291	303.379
contig427	552	2298	308.895
contig428	552	984	130.248
contig429	551	535	71.1652
contig430	551	252	33.7423
contig431	549	6795	916.14
contig432	548	1324	177.573
contig433	546	4153	559.253
contig434	544	2708	368.866
contig435	541	1770	240.22
contig436	541	1752	239.854
contig437	7247	9046	92.4181
contig438	540	712	96.9444
contig439	538	686	92.9108
contig440	535	722	97.5121
contig441	534	916	126.762
contig442	532	3853	531.171
contig443	531	1151	160.51
contig444	529	1765	245.1
contig445	6616	8029	89.9288
contig446	519	1086	151.439
contig447	518	396	55.7838
contig448	517	593	84.6499
contig449	515	690	99.1689
contig450	515	2321	332.817
contig451	509	550	79.4126
contig452	509	570	82.9823
contig453	509	2445	354.004
contig454	507	591	86.5345
contig455	507	1821	265.209
contig456	501	479	70.6667
