# Supplementary material for: Accumulation and expression of multiple antibiotic resistance genes in Arcobacter cryaerophilus that thrives in sewage
Source: PeerJ journal article supplement (doi:10.7717/peerj.3269), 2017-04-25
Supplement: Millar-2017-Table_S7.xlsx [file Millar-2017-Table_S7.xlsx]

## Sheet: A cryaerophilus
ORF	CARD ID	Resistance Class	Mechanism	Evalue	% ID	% Coverage
scaffold1_41	sul3	Sulfonamide	Sulfonamide resistant dihydropteroate synthase	2.88603e-38	31	67
scaffold10_27	vanRB	Vancomycin	Cell wall modification conferring glycopeptide resistance	9.95053e-34	38	98
scaffold10_28	baeS	Aminocoumarin; Aminoglycosides	Aminocoumarin and aminoglycoside resistant efflux pump	1.70065e-13	45	47
scaffold106_5	smeB	Fluoroquinolones	Multidrug resistant efflux pump	1.80333e-13	29	77
scaffold109_2	oleB	Lincosamide; Macrolide; Streptogramin B	Macrolide resistance ATP-binding cassette (ABC) efflux pump	1.51161e-22	46	86
scaffold11_17	cphA1	Beta Lactams	Class B beta-lactamase	1.69266e-23	45	89
scaffold110_5	arlR	Fluoroquinolones	Fluoroquinolone resistance efflux pump	3.31292e-18	43	97
scaffold111_5	vanRI	Vancomycin	Cell wall modification conferring glycopeptide resistance	7.71409e-44	37	98
scaffold123_2	PBP2x	Penicillin	Beta lactam resistant PBP2x	1.12828e-22	50	69
scaffold124_3	MCR-1	Polymyxin	Polymyxin resistant phosphoethanolamine transferase	6.19528e-14	39	45
scaffold124_4	MCR-1	Polymyxin	Polymyxin resistant phosphoethanolamine transferase	1.27989e-29	56	68
scaffold124_5	PmrC	Polymyxin	LPS lipid A modification conferring polymyxin resistance	5.28572e-14	45	96
scaffold130_2	tet36	Tetracycline	Tetracycline resistance ribosomal protection protein	1.00524e-21	38	69
scaffold131_4	macB	Macrolide	Macrolide resistance efflux pumps	3.56313e-21	50	90
scaffold135_1	arlR	Fluoroquinolones	Fluoroquinolone resistance efflux pump	3.35547e-11	50	55
scaffold137_1	arlR	Fluoroquinolones	Fluoroquinolone resistance efflux pump	1.13239e-13	52	64
scaffold14_19	PmrE	Polymyxin	LPS lipid A modification conferring polymyxin resistance	0	68	99
scaffold141_5	macB	Macrolide	Macrolide resistance efflux pumps	1.54824e-29	50	65
scaffold147_1	mdtB	Aminocoumarin	Aminocoumarin resistance efflux pump	2.41933e-37	44	83
scaffold147_2	mdtB	Aminocoumarin	Aminocoumarin resistance efflux pump	6.70108e-16	58	80
scaffold150_2	bacA	Bacitracin	Bacitracin-resistant undecaprenyl pyrophosphate	1.36505e-53	37	92
scaffold16_16	macB	Macrolide	Macrolide resistance efflux pumps	2.72773e-40	50	99
scaffold16_23	baeR	Aminocoumarin; Aminoglycosides	Aminocoumarin and aminoglycoside resistant efflux pump	1.89419e-36	38	99
scaffold16_24	PmrB	Polymyxin	LPS lipid A modification conferring polymyxin resistance	4.09373e-13	36	61
scaffold165_3	baeS	Aminocoumarin; Aminoglycosides	Aminocoumarin and aminoglycoside resistant efflux pump	2.5088e-21	52	83
scaffold168_2	macB	Macrolide	Macrolide resistance efflux pumps	2.76437e-48	45	98
scaffold168_3	macB	Macrolide	Macrolide resistance efflux pumps	1.38574e-61	47	95
scaffold169_3	LRA-12	Beta Lactams	LRA beta-lactamase	6.58112e-11	38	62
scaffold17_15	macB	Macrolide	Macrolide resistance efflux pumps	1.18954e-14	50	70
scaffold18_22	macB	Macrolide	Macrolide resistance efflux pumps	1.26374e-16	55	94
scaffold19_18	Streptomyces rishiriensis parY mutant conferring resistance to aminocoumarin	Aminocoumarin	Aminocoumarin resistant DNA topoisomerase subunit parY	6.03212e-137	43	85
scaffold19_8	macB	Macrolide	Macrolide resistance efflux pumps	4.45434e-30	37	72
scaffold197_2	carA	Lincosamide; Macrolide; Streptogramin B	Macrolide resistance ATP-binding cassette (ABC) efflux pump	1.10066e-51	45	99
scaffold199_1	mexD	Erythromycin; Fluoroquinolones; Glycylcycline; Roxithromycin	Multidrug resistant efflux pump	2.76859e-58	56	100
scaffold199_2	mdsB	Chloramphenicol; Beta Lactams	Chloramphenicol and beta lactam resistant efflux pump	2.11607e-39	47	82
scaffold2_34	macB	Macrolide	Macrolide resistance efflux pumps	1.16475e-12	44	89
scaffold213_1	Bifidobacteria intrinsic ileS conferring resistance to mupirocin	Mupirocin	Mupirocin-resistant isoleucyl-tRNA synthetase	1.05297e-12	38	63
scaffold216_1	Bifidobacteria intrinsic ileS conferring resistance to mupirocin	Mupirocin	Mupirocin-resistant isoleucyl-tRNA synthetase	3.0396e-29	37	89
scaffold221_1	arlS	Fluoroquinolones	Fluoroquinolone resistance efflux pump	7.18793e-22	44	97
scaffold224_1	mexN	Chloramphenicol	Chloramphenicol resistant efflux pump	3.77686e-37	45	93
scaffold23_15	Erm(36)	Lincosamide; Macrolide; Streptogramin B	Erm 23S rRNA methyltransferase	1.50545e-23	68	97
scaffold23_4	baeS	Aminocoumarin; Aminoglycosides	Aminocoumarin and aminoglycoside resistant efflux pump	1.4878e-16	38	53
scaffold23_5	vanRB	Vancomycin	Cell wall modification conferring glycopeptide resistance	1.27578e-37	33	89
scaffold23_9	cfrA	Lincosamide; Macrolide; Streptogramin B; Chloramphenicol	Cfr 23S rRNA methyltransferase	4.66351e-48	42	96
scaffold237_2	macB	Macrolide	Macrolide resistance efflux pumps	6.00985e-41	61	99
scaffold26_4	bcrA	Bacitracin	Bacitracin resistance ATP-binding cassette (ABC) efflux pump	9.33845e-20	31	89
scaffold3_25	baeS	Aminocoumarin; Aminoglycosides	Aminocoumarin and aminoglycoside resistant efflux pump	8.22357e-16	31	53
scaffold3_26	vanRB	Vancomycin	Cell wall modification conferring glycopeptide resistance	3.49359e-29	33	99
scaffold3_31	tet34	Tetracycline	Xanthine-guanine phosphoribosyltransferase	1.18646e-11	30	79
scaffold3_7	bcrA	Bacitracin	Bacitracin resistance ATP-binding cassette (ABC) efflux pump	7.00995e-33	44	90
scaffold306_1	PmrA	Ciprofloxacin; Norfloxacin	LPS lipid A modification conferring polymyxin resistance	1.10978e-17	41	97
scaffold31_17	PmrA	Ciprofloxacin; Norfloxacin	LPS lipid A modification conferring polymyxin resistance	2.461e-29	34	82
scaffold311_1	arlR	Fluoroquinolones	Fluoroquinolone resistance efflux pump	1.71127e-35	36	97
scaffold32_11	PBP1a	Penicillin	Beta lactam resistant PBP1a	3.47759e-66	32	95
scaffold32_12	macB	Macrolide	Macrolide resistance efflux pumps	1.3893e-15	35	70
scaffold320_1	aminocoumarin resistant alaS	Aminocoumarin	Novobiocin-resistant alanyl-tRNA synthetase	9.85017e-53	42	90
scaffold322_1	Streptomyces rishiriensis parY mutant conferring resistance to aminocoumarin	Aminocoumarin	Aminocoumarin resistant DNA topoisomerase subunit parY	1.66e-41	66	72
scaffold324_1	vanHM	Vancomycin	Cell wall modification conferring glycopeptide resistance	2.90382e-14	34	58
scaffold326_2	vanRN	Vancomycin	Cell wall modification conferring glycopeptide resistance	6.25375e-13	40	80
scaffold335_1	aminocoumarin resistant alaS	Aminocoumarin	Novobiocin-resistant alanyl-tRNA synthetase	5.14693e-49	42	75
scaffold34_1	aminocoumarin resistant alaS	Aminocoumarin	Novobiocin-resistant alanyl-tRNA synthetase	2.51711e-23	38	99
scaffold34_2	aminocoumarin resistant alaS	Aminocoumarin	Novobiocin-resistant alanyl-tRNA synthetase	8.56124e-14	39	76
scaffold34_3	aminocoumarin resistant alaS	Aminocoumarin	Novobiocin-resistant alanyl-tRNA synthetase	4.27021e-152	54	97
scaffold343_1	vgaD	Streptogramin	Streptogramin and pleuromutilin resistant efflux pump	7.88446e-24	57	87
scaffold35_11	vgaB	Streptogramin A	Streptogramin resistance efflux pump	7.90555e-58	54	88
scaffold377_1	MCR-1	Polymyxin	Polymyxin resistant phosphoethanolamine transferase	1.33598e-14	37	91
scaffold382_1	aminocoumarin resistant alaS	Aminocoumarin	Novobiocin-resistant alanyl-tRNA synthetase	2.56516e-49	45	90
scaffold39_4	mfd	Ciprofloxacin; Fluoroquinolones	Fluoroquinolone resistant transcription-repair coupling factor	2.42332e-146	37	73
scaffold4_15	oleC	Macrolide	Macrolide resistance ATP-binding cassette (ABC) efflux pump	2.19792e-46	52	76
scaffold4_36	oleB	Lincosamide; Macrolide; Streptogramin B	Macrolide resistance ATP-binding cassette (ABC) efflux pump	4.75408e-30	60	67
scaffold4_37	msrC	Streptogramin; Macrolide	Streptogramin and macrolide resistant efflux pump	9.25704e-21	51	64
scaffold4_7	vanRE	Vancomycin	Cell wall modification conferring glycopeptide resistance	7.45864e-11	47	93
scaffold40_15	macB	Macrolide	Macrolide resistance efflux pumps	2.87421e-15	57	95
scaffold40_5	otrA	Tetracycline	Tetracycline resistance ribosomal protection protein	7.69805e-24	45	74
scaffold402_1	vgaE	Streptogramin	Streptogramin and pleuromutilin resistant efflux pump	7.61885e-25	45	75
scaffold408_1	cmeB	Fluoroquinolones; Macrolide; Beta Lactams	Multidrug resistant efflux pump	4.28664e-48	47	98
scaffold42_1	rosB	Fosmidomycin	Polymyxin resistance efflux pump	4.05006e-21	37	84
scaffold420_2	Mycobacterium tuberculosis murA	Fosfomycin	Fosfomycin resistant pyruvyl transferase	3.34422e-24	41	95
scaffold43_7	vanRB	Vancomycin	Cell wall modification conferring glycopeptide resistance	4.85744e-28	31	96
scaffold43_8	phoQ	Polymyxin; Macrolide	Polymyxin and macrolide resistance efflux pump	6.70532e-11	35	71
scaffold46_1	Bifidobacteria intrinsic ileS conferring resistance to mupirocin	Mupirocin	Mupirocin-resistant isoleucyl-tRNA synthetase	8.1895e-14	58	98
scaffold46_4	cpxA	Aminocoumarin; Aminoglycosides	Aminocoumarin aminoglycoside resistant efflux pump	8.08521e-14	42	37
scaffold46_5	vanRG	Vancomycin	Cell wall modification conferring glycopeptide resistance	2.86613e-27	31	98
scaffold48_9	vanRB	Vancomycin	Cell wall modification conferring glycopeptide resistance	3.92648e-12	35	88
scaffold49_5	bcrA	Bacitracin	Bacitracin resistance ATP-binding cassette (ABC) efflux pump	2.01594e-26	40	89
scaffold5_32	Mycobacterium tuberculosis murA	Fosfomycin	Fosfomycin resistant pyruvyl transferase	1.26025e-64	45	98
scaffold50_2	PmrB	Polymyxin	LPS lipid A modification conferring polymyxin resistance	3.82103e-23	32	65
scaffold50_3	arlR	Fluoroquinolones	Fluoroquinolone resistance efflux pump	3.75247e-29	35	93
scaffold54_9	tetJ	Tetracycline	Tetracycline resistant efflux pump	1.7408e-19	44	81
scaffold61_2	arlR	Fluoroquinolones	Fluoroquinolone resistance efflux pump	5.70406e-33	38	96
scaffold61_7	mexK	Tetracycline; Erythromycin; Triclosan	Multidrug resistant efflux pump	8.50013e-24	30	95
scaffold61_8	mdtB	Aminocoumarin	Aminocoumarin resistance efflux pump	4.82031e-37	40	98
scaffold61_9	mexJ	Tetracycline; Erythromycin; Triclosan	Multidrug resistant efflux pump	2.90644e-16	41	88
scaffold62_2	vanL	Vancomycin	Cell wall modification conferring glycopeptide resistance	2.68318e-30	29	87
scaffold63_5	evgS	Fluoroquinolones; Tetracycline; Macrolide; Beta Lactams	Major facilitator superfamily (MFS) antibotic efflux pump	1.6821e-11	39	97
scaffold63_7	arlR	Fluoroquinolones	Fluoroquinolone resistance efflux pump	1.01066e-35	35	76
scaffold66_1	Bifidobacteria intrinsic ileS conferring resistance to mupirocin	Mupirocin	Mupirocin-resistant isoleucyl-tRNA synthetase	2.4394e-12	40	71
scaffold66_10	macB	Macrolide	Macrolide resistance efflux pumps	7.73439e-36	52	88
scaffold67_2	Campylobacter jejuni gyrA conferring resistance to fluoroquinolone	Fluoroquinolones; Ciprofloxacin	Fluoroquinolone resistant DNA topoisomerase subunit gyrA	1.31918e-128	68	97
scaffold68_1	macA	Macrolide	Macrolide resistance efflux pumps	3.9833e-11	36	50
scaffold7_31	vanHM	Vancomycin	Cell wall modification conferring glycopeptide resistance	3.7858e-24	31	52
scaffold71_10	otrA	Tetracycline	Tetracycline resistance ribosomal protection protein	3.70196e-35	44	81
scaffold71_12	tetT	Tetracycline	Tetracycline resistance ribosomal protection protein	1.11249e-13	32	95
scaffold71_6	cmlv	Chloramphenicol	Chloramphenicol phosphotransferase	4.36622e-34	56	94
scaffold72_2	oprM	Aminoglycosides; Beta Lactams; Fluoroquinolones; Tetracycline; Tigecycline	Multidrug resistant efflux pump	3.15996e-97	47	99
scaffold72_3	adeG	Fluoroquinolones; Tetracycline	Fluoroquinolone and Tetracycline resistance efflux pump	0	52	99
scaffold72_4	mexA	Aminoglycosides; Beta Lactams; Fluoroquinolones; Tetracycline; Tigecycline	Multidrug resistant efflux pump	8.04988e-78	44	87
scaffold75_9	tsnr	Thiostrepton	Non-erm 23S rRNA methyltransferase	8.65636e-15	26	97
scaffold79_3	macB	Macrolide	Macrolide resistance efflux pumps	2.90586e-20	36	56
scaffold80_2	vanTG	Vancomycin	Cell wall modification conferring glycopeptide resistance	3.27549e-33	31	86
scaffold86_3	mecB	Beta Lactams	Methicillin resistant PBP2	3.62519e-40	41	92
scaffold9_8	arnA	Polymyxin	LPS lipid A modification conferring polymyxin resistance	2.06785e-11	34	59
scaffold97_4	MSI-OXA	Beta Lactams	Class D beta-lactamase	8.48338e-14	53	76
scaffold97_5	OXA-198	Beta Lactams	Serine beta-lactamase	4.17217e-37	64	97
scaffold97_8	cmeB	Fluoroquinolones; Macrolide; Beta Lactams	Multidrug resistant efflux pump	5.26297e-67	58	98
