# Supplementary material for: Accumulation and expression of multiple antibiotic resistance genes in Arcobacter cryaerophilus that thrives in sewage
Source: PubMed Central journal article supplement (PMC5407278; doi:10.7717/peerj.3269), 2017-04-25
Supplement: peerj-05-3269-s001.pdf [file peerj-05-3269-s001.pdf]

**FIG S1.** *Arcobacter* housekeeping gene trees. Bayesian phylogenetic trees for nucleotide sequences of *Arcobacter* housekeeping genes **(A)** *atpA* (618nt) **(B)** *gyrA* (684nt) **(C)** *hsp60* (285nt) and **(D)** *rpoB* (618nt) to identify sewage contigs belonging to *A. cryaerophilus* (in blue).

**A**

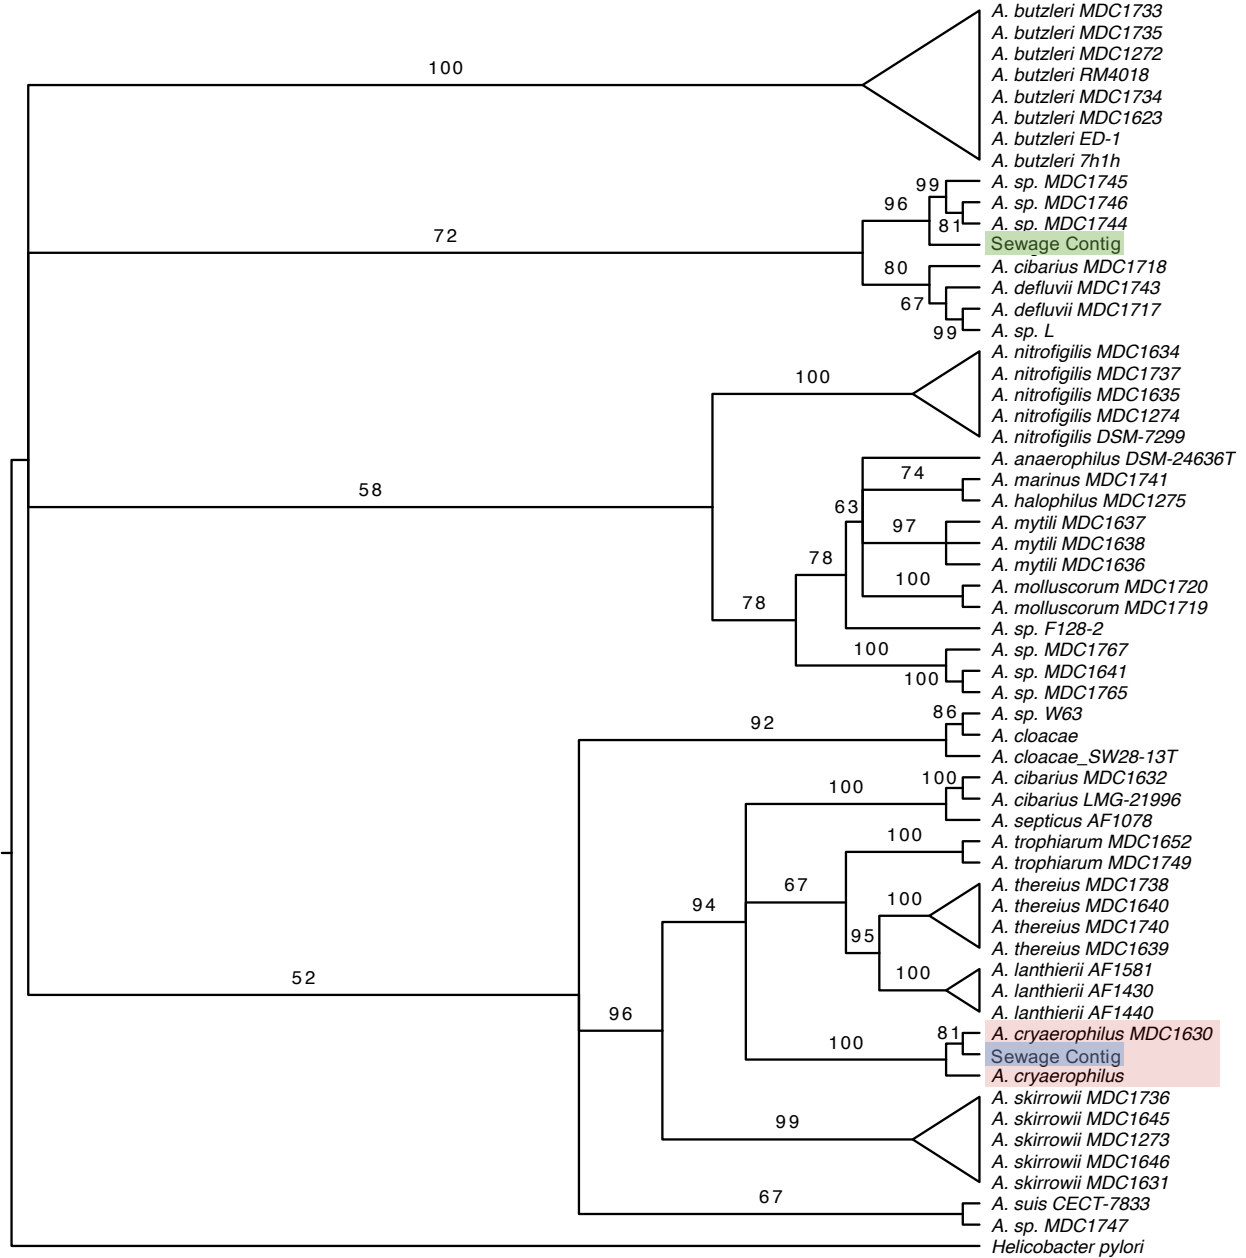

B

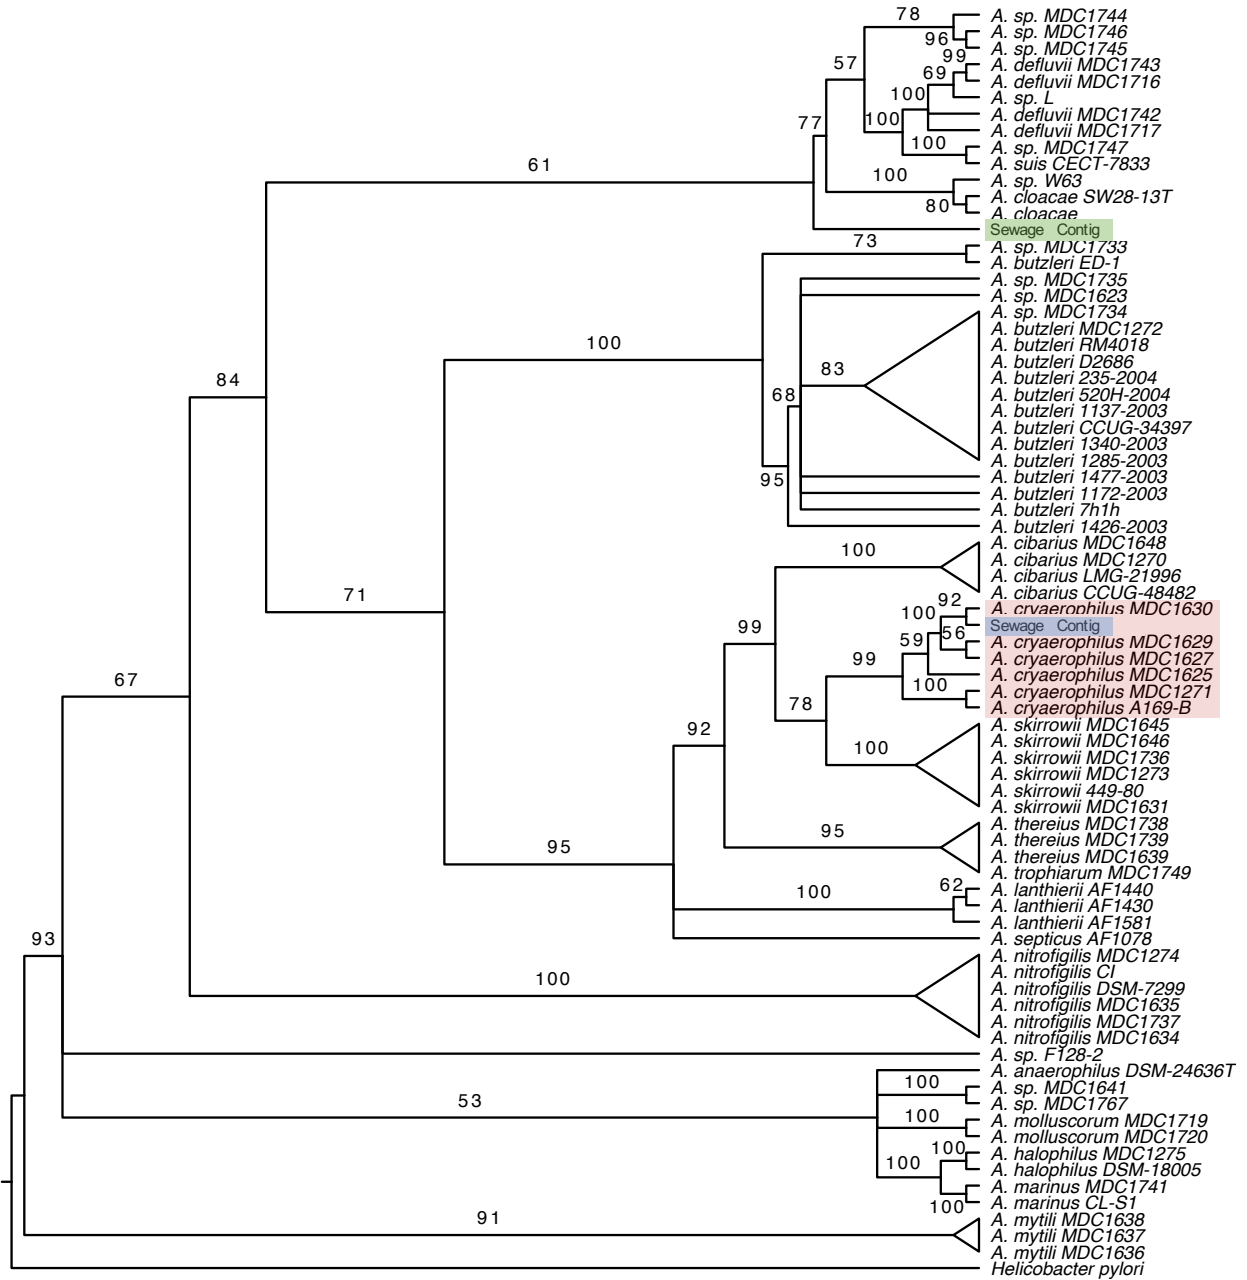

C

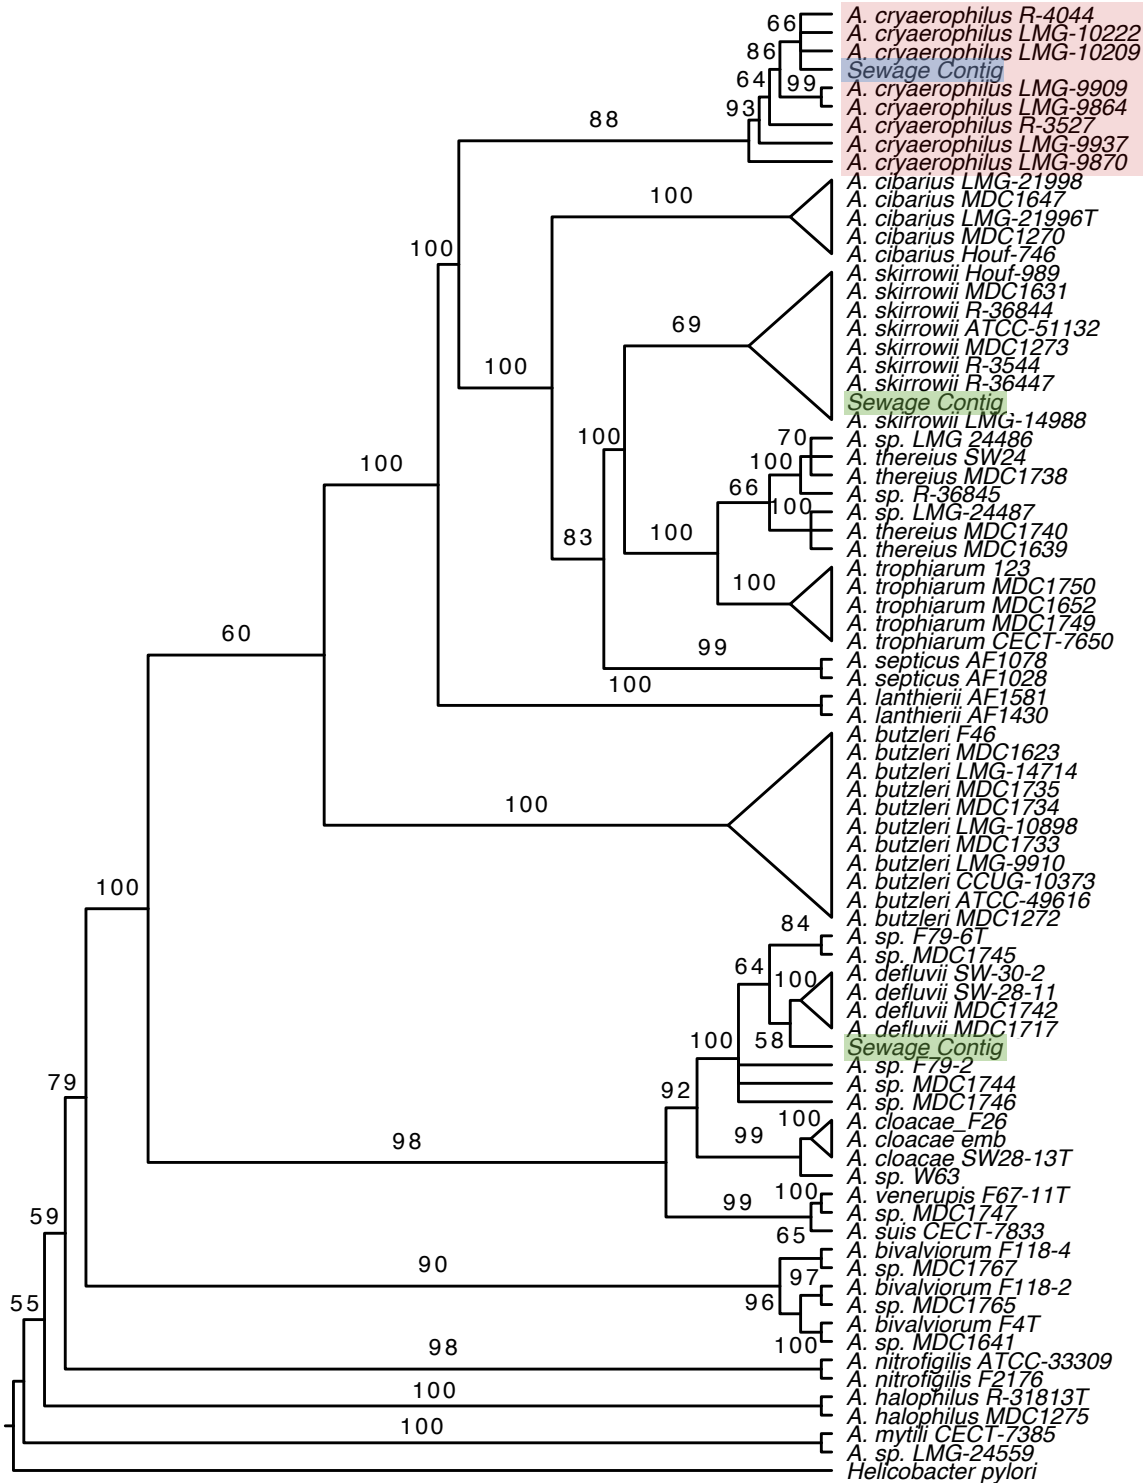

D

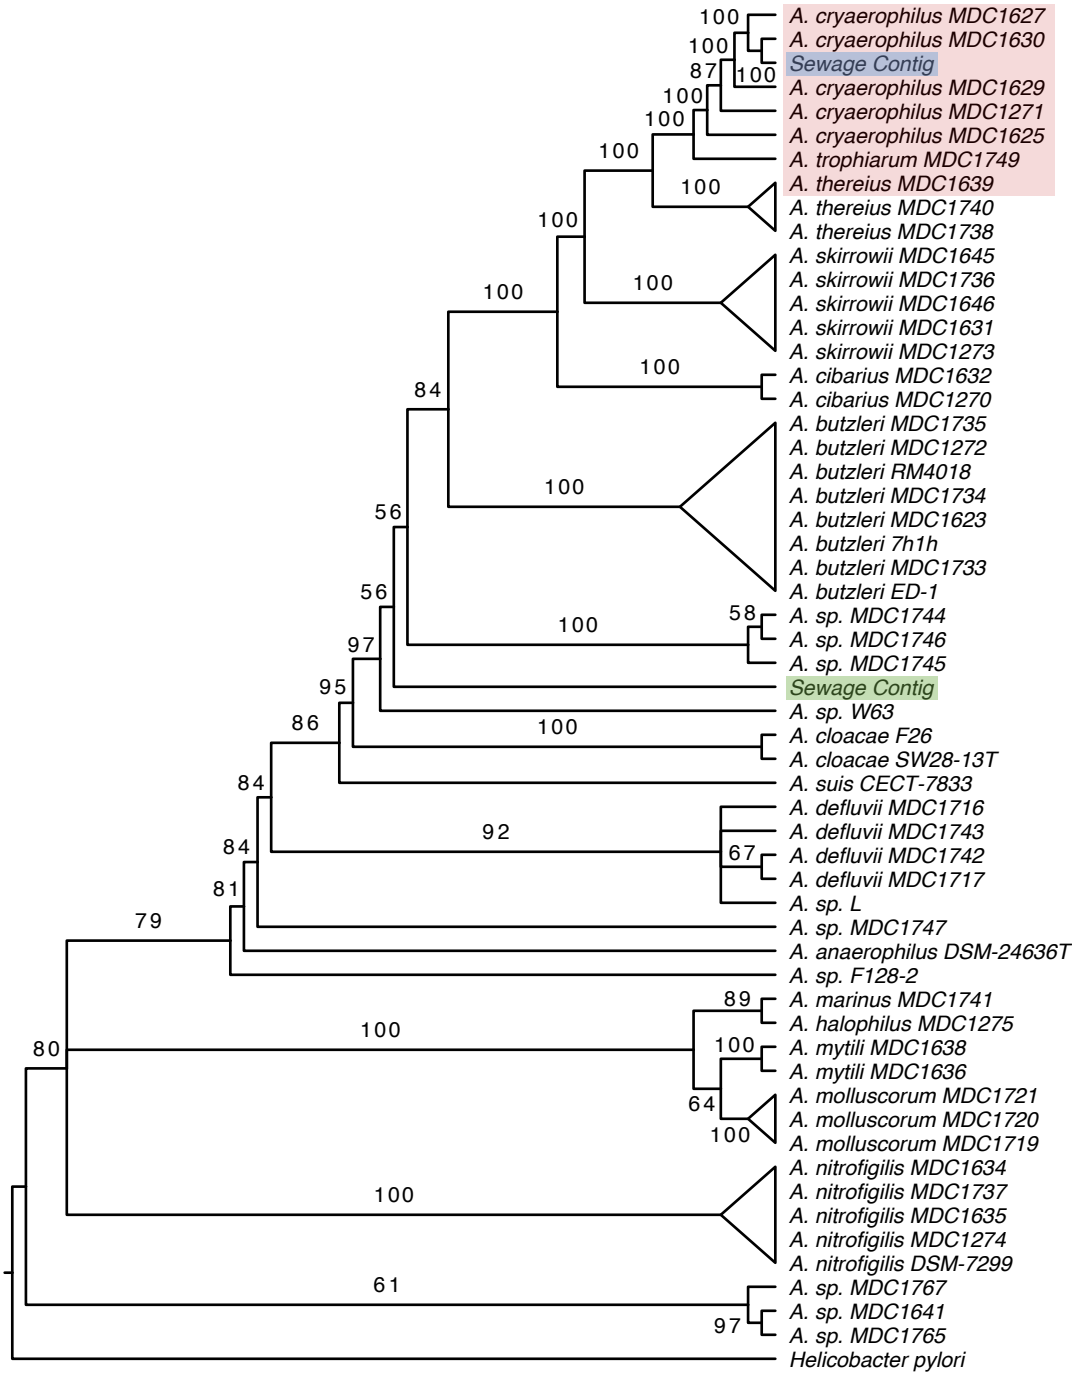

0.2

**FIG S2.** Genome bins found in initial clustering using Albertsen et al. 2013 differential coverage binning procedure for metagenomic data. The top right cluster with ~200x coverage contained all *A. cryaerophilus* housekeeping genes (Fig. S1) and was selected for secondary refinement and finishing.

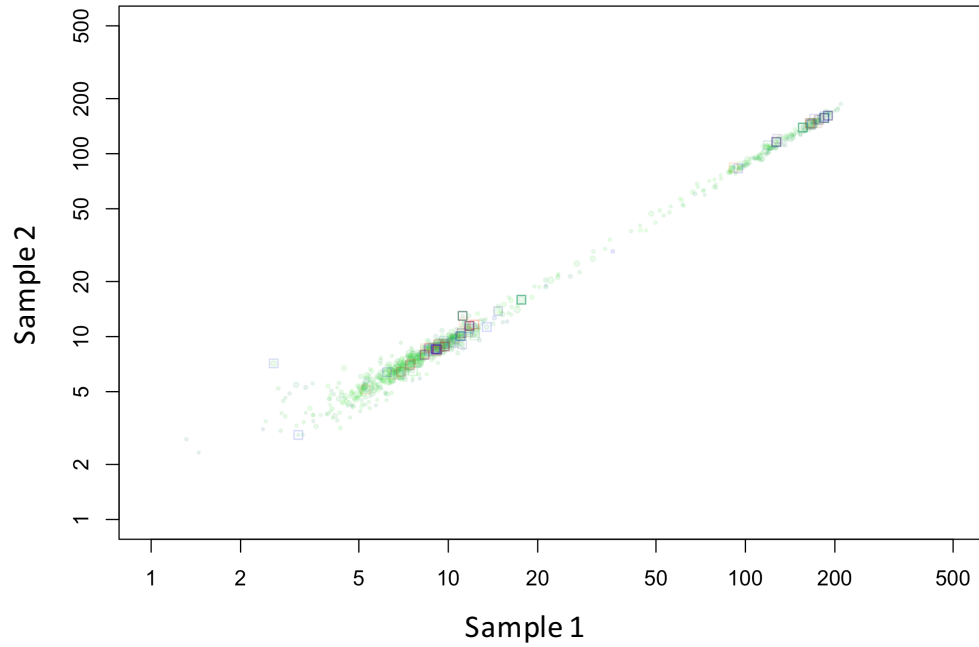

**FIG S3.** Phylogenetic trees to validate HGTector data. Bayesian trees of *Arcobacter cryaerophilus* ORFs **(A)** scaffold1\_44 (tetracycline resistance ribosomal protection protein, 2151nt) and **(B)** scaffold228\_1 (chloramphenicol phosphotransferase, 258nt) that place the ORFs outside of the phylum Proteobacteria (in blue).

**A**

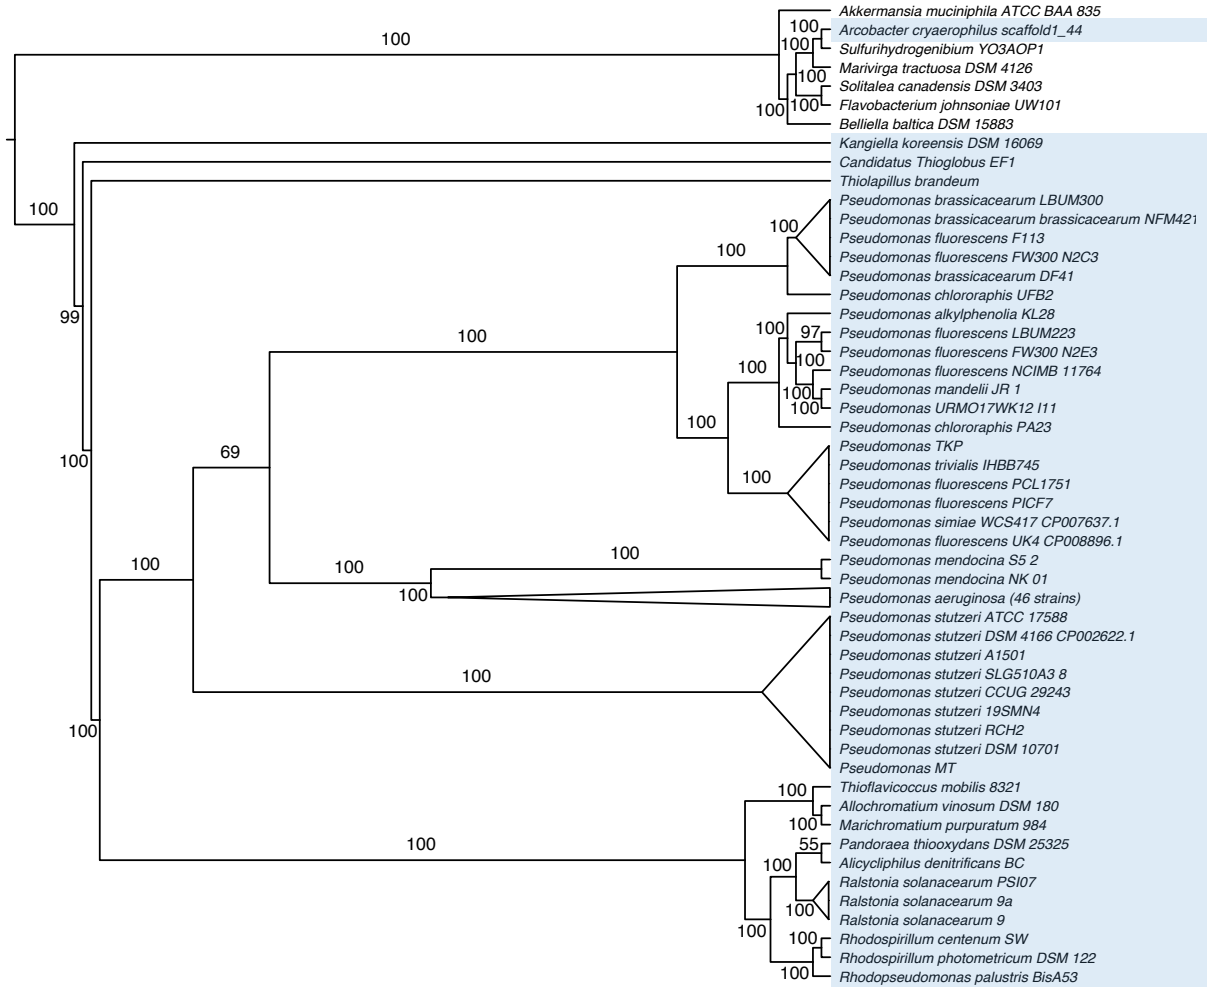

0.2

**B**

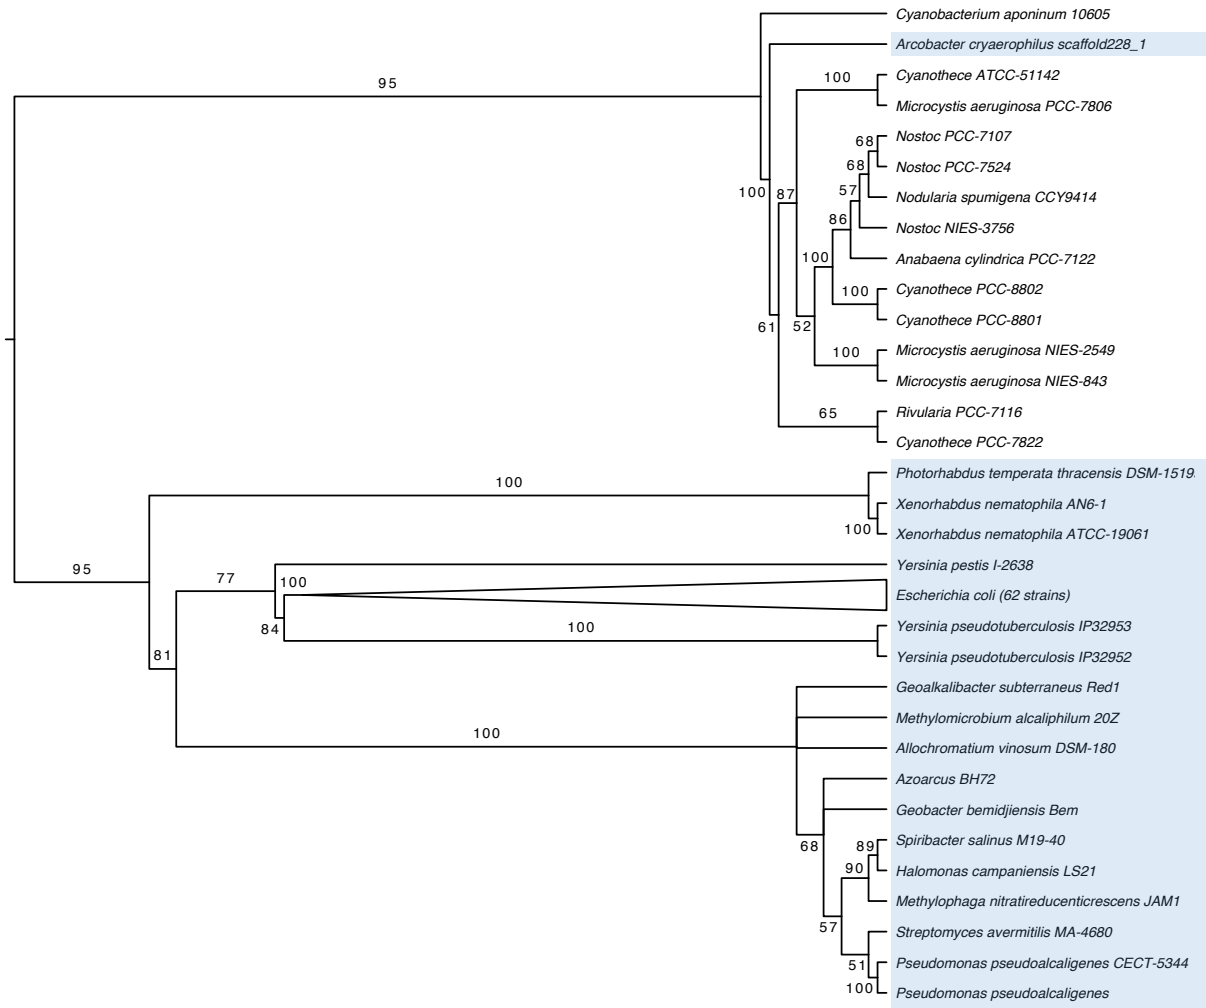

0.2

**FIG S4.** Genome alignment of *Arcobacter butzleri* (top) and *Arcobacter cryaerophilus* (bottom). Homologous “locally collinear blocks” are identified using Mauve and connected with lines of the same color to show genome rearrangements.

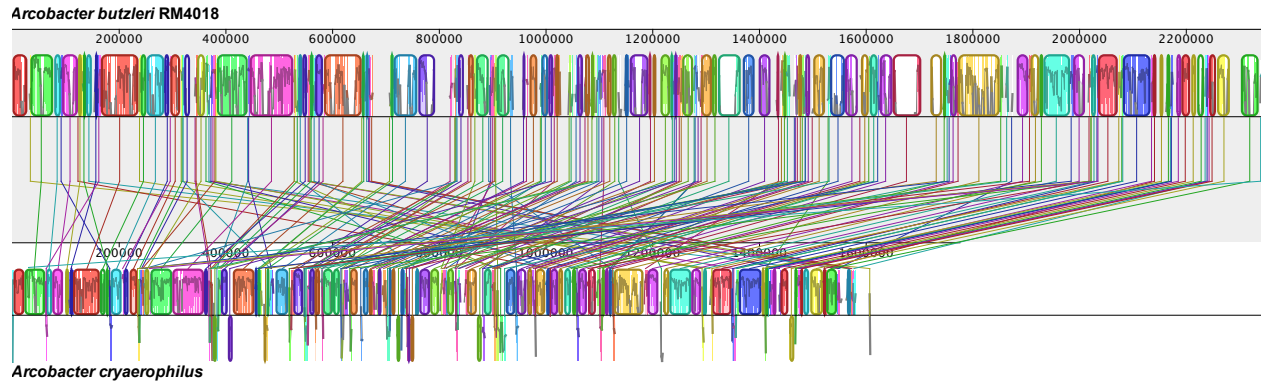



**TABLE S1.** DNA/RNA Reads and Assembly Totals

| Reads   |                                     | Sample 1     | Sample 2     | Sample 3     |
|---------|-------------------------------------|--------------|--------------|--------------|
| DNA     | Raw                                 | 27,149,400   | 56,951,058   | 69,948,228   |
|         | Cleaned                             | 17,632,699   | 37,306,119   | 46,473,784   |
|         | Sub Sample                          | 17,000,000   | 17,000,000   | 17,000,000   |
|         | Mapped to Sewage Contigs            | 7,703,851    | 10,257,818   | 11,710,891   |
|         | Mapped to <i>Arcobacter</i> Contigs | 6,947,969    | 9,192,258    | 10,294,926   |
| RNA     | Raw                                 | 142,205,531  | 91,010,362   | 58,196,397   |
|         | Cleaned                             | 125,234,635  | 84,879,463   | 54,872,132   |
|         | Sub Sample                          | 50,000,000   | 50,000,000   | 50,000,000   |
|         | Mapped to Sewage Contigs            | 8,641,383    | 6,985,173    | 7,355,494    |
|         | Mapped to <i>Arcobacter</i> Contigs | 8,122,362    | 6,409,562    | 6,756,931    |
| Contigs | Raw                                 | 6,522        | 15,910       | 17,210       |
|         | Sub Sample                          | 6,000        | 6,000        | 6,000        |
|         | Average Length                      | 1,189        | 1,145        | 1,087        |
|         | Length Range                        | 300 - 27,864 | 300 - 27,810 | 300 - 18,778 |
|         | Phylum Annotated                    | 2,866        | 3,433        | 3,264        |

**TABLE S2.** Comparison of annotated categories in *Arcobacter*.

| Category                         | Ac <sup>a</sup> | Ab <sup>b</sup> | Category              | Ac  | Ab  |
|----------------------------------|-----------------|-----------------|-----------------------|-----|-----|
| Virulence Factors                |                 |                 | Antibiotic Resistance |     |     |
| Acid resistance                  | 1               | 1               | Aminocoumarin         | 17  | 15  |
| Adhesion                         | 18              | 20              | Aminoglycosides       | 8   | 23  |
| Anti-apoptosis                   | 1               | 1               | Bacitracin            | 4   | 5   |
| Biofilm                          | 1               | 1               | Beta Lactams          | 11  | 16  |
| Capsule                          | 1               | 1               | Bicyclomycin          | 0   | 2   |
| Cell surface and memb. prot.     | 5               | 6               | Chloramphenicol       | 4   | 4   |
| Cell-to-cell spread              | 1               | 1               | Ciprofloxacin         | 4   | 4   |
| Cellular metabolism              | 22              | 12              | Elfamycin             | 0   | 2   |
| Chaperone                        | 3               | 1               | Erythromycin          | 3   | 2   |
| Cording                          | 2               | 1               | Fluoroquinolones      | 18  | 21  |
| Defense agnst. host imm. resp.   | 3               | 3               | Fosfomycin            | 2   | 1   |
| Intracellular survival and repl. | 30              | 20              | Fosmidomycin          | 1   | 2   |
| Invasion                         | 11              | 14              | Glycylcycline         | 1   | 0   |
| Iron uptake                      | 4               | 14              | Isoniazid             | 0   | 1   |
| Mitogenic                        | 3               | 1               | Kanamycin             | 0   | 2   |
| Modulate host immune resp.       | 3               | 9               | Lincosamide           | 5   | 6   |
| Phosphate uptake                 | 3               | 0               | Macrolide             | 26  | 25  |
| Regulation of gene expression    | 4               | 5               | Mupirocin             | 4   | 1   |
| Secretion                        | 4               | 3               | Norfloxacin           | 2   | 3   |
| Stress                           | 5               | 3               | Penicillin            | 2   | 6   |
| Two-component system             | 6               | 2               | Polymyxin             | 9   | 9   |
| Type III secretion               | 4               | 1               | Roxithromycin         | 1   | 0   |
| Type VII secretion               | 0               | 1               | Streptogramin         | 9   | 9   |
| Virulence                        | 153             | 114             | Streptomycin          | 0   | 4   |
| Zinc uptake                      | 2               | 1               | Sulfonamide           | 1   | 1   |
|                                  |                 |                 | Teicoplanin           | 0   | 3   |
| Transposases                     |                 |                 | Tetracycline          | 12  | 24  |
| IS1                              | 26              | 34              | Thiostrepton          | 1   | 1   |
| IS110                            | 4               | 0               | Tigecycline           | 2   | 6   |
| IS116                            | 0               | 3               | Triclosan             | 2   | 3   |
| IS21                             | 4               | 1               | Vancomycin            | 13  | 27  |
| IS3                              | 6               | 4               |                       |     |     |
| IS4-5                            | 0               | 5               | Prophage genes        | 290 | 320 |
| IS408                            | 4               | 0               |                       |     |     |
| IS4like                          | 13              | 2               | Single copy genes     | 100 | 106 |
| IS66                             | 4               | 8               |                       |     |     |

<sup>a</sup>*A. cryaerophilus*, <sup>b</sup>*A. butzleri*

**TABLE S3.** Number and expression of antibiotic resistance categories annotated in *A. cryaerophilus*.

| Antibiotic Resistance Category | Average Total ORFs | Average Expressed ORFs |
|--------------------------------|--------------------|------------------------|
| Aminocoumarin                  | 17                 | 17.0                   |
| Aminoglycosides                | 8                  | 8.0                    |
| Bacitracin                     | 4                  | 4.0                    |
| Beta Lactams                   | 11                 | 11.0                   |
| Chloramphenicol                | 4                  | 4.0                    |
| Ciprofloxacin                  | 4                  | 4.0                    |
| Erythromycin                   | 3                  | 3.0                    |
| Fluoroquinolones               | 18                 | 18.0                   |
| Fosfomycin                     | 2                  | 1.7                    |
| Fosmidomycin                   | 1                  | 1.0                    |
| Glycylcycline                  | 1                  | 1.0                    |
| Lincosamide                    | 5                  | 5.0                    |
| Macrolide                      | 26                 | 25.7                   |
| Mupirocin                      | 4                  | 3.7                    |
| Norfloxacin                    | 2                  | 2.0                    |
| Penicillin                     | 2                  | 2.0                    |
| Polymyxin                      | 9                  | 9.0                    |
| Streptogramin                  | 9                  | 9.0                    |
| Sulfonamide                    | 1                  | 1.0                    |
| Tetracycline                   | 12                 | 12.0                   |
| Thiostrepton                   | 1                  | 1.0                    |
| Tigecycline                    | 2                  | 2.0                    |
| Triclosan                      | 2                  | 2.0                    |
| Vancomycin                     | 13                 | 12.7                   |

**TABLE S4.** Number and expression of antibiotic resistance categories annotated in whole sewage sample.

| Antibiotic Resistance Category | Average Total ORFs | Average Expressed ORFs |
|--------------------------------|--------------------|------------------------|
| Acriflavine                    | 29                 | 25.0                   |
| Aminocoumarin                  | 275                | 210.3                  |
| Aminoglycosides                | 184                | 137.7                  |
| Bacitracin                     | 140                | 90.0                   |
| Beta Lactams                   | 323                | 249.7                  |
| Bicyclomycin                   | 13                 | 10.3                   |
| Chloramphenicol                | 148                | 115.3                  |
| Ciprofloxacin                  | 113                | 77.7                   |
| Deoxycholate                   | 2                  | 0.0                    |
| Doxorubicin                    | 1                  | 1.0                    |
| Elfamycin                      | 52                 | 48.7                   |
| Enoxacin                       | 8                  | 1.3                    |
| Erythromycin                   | 33                 | 29.7                   |
| Fluoramphenicol                | 3                  | 1.0                    |
| Fluoroquinolones               | 471                | 346.7                  |
| Fosfomycin                     | 22                 | 17.0                   |
| Fosmidomycin                   | 19                 | 13.0                   |
| Glycylcycline                  | 17                 | 16.0                   |
| Isoniazid                      | 20                 | 19.0                   |
| Kanamycin                      | 14                 | 6.0                    |
| Lincomycin                     | 6                  | 2.7                    |
| Lincosamide                    | 168                | 130.3                  |
| Macrolide                      | 682                | 485.3                  |
| Mupirocin                      | 57                 | 51.7                   |
| Norfloxacin                    | 44                 | 28.3                   |
| Penicillin                     | 54                 | 47.7                   |
| Polymyxin                      | 134                | 108.0                  |
| Puromycin                      | 6                  | 4.0                    |
| Rifampin                       | 27                 | 18.7                   |
| Roxithromycin                  | 4                  | 4.0                    |
| Streptogramin                  | 144                | 112.3                  |
| Streptomycin                   | 35                 | 27.7                   |
| Sulfonamide                    | 23                 | 15.3                   |
| Teicoplanin                    | 88                 | 54.3                   |
| Tetracenomycin C               | 2                  | 1.3                    |
| Tetracycline                   | 392                | 317.3                  |
| Tetraphenylarsonium Chloride   | 6                  | 4.0                    |
| Thiostrepton                   | 21                 | 15.3                   |
| Tigecycline                    | 55                 | 40.7                   |
| Triclosan                      | 43                 | 38.3                   |
| Trimethoprim                   | 35                 | 24.0                   |
| Vancomycin                     | 244                | 162.7                  |

**TABLE S5.** Number and expression of virulence factor categories annotated in *A. cryaerophilus*.

| Virulence Factor Category           | Average Total ORFs | Average Expressed ORFs |
|-------------------------------------|--------------------|------------------------|
| Acid resistance                     | 1                  | 1.0                    |
| Adhesion                            | 18                 | 17.7                   |
| Anti-apoptosis                      | 1                  | 1.0                    |
| Biofilm                             | 1                  | 1.0                    |
| Capsule                             | 1                  | 1.0                    |
| Cell surface and memb. proteins     | 5                  | 5.0                    |
| Cell-to-cell spread                 | 1                  | 1.0                    |
| Cellular metabolism                 | 22                 | 22.0                   |
| Chaperone                           | 3                  | 3.0                    |
| Cording                             | 2                  | 2.0                    |
| Defense against host imm. resp.     | 3                  | 3.0                    |
| Intracell. survival and replication | 30                 | 30.0                   |
| Invasion                            | 11                 | 11.0                   |
| Iron uptake                         | 4                  | 3.7                    |
| Mitogenic                           | 3                  | 3.0                    |
| Modulate host immune response       | 3                  | 3.0                    |
| Phosphate uptake                    | 3                  | 3.0                    |
| Regulation of gene expression       | 4                  | 4.0                    |
| Secretion                           | 4                  | 4.0                    |
| Stress                              | 5                  | 5.0                    |
| Two-component system                | 6                  | 6.0                    |
| Type III secretion                  | 4                  | 4.0                    |
| Virulence                           | 153                | 151.0                  |
| Zinc uptake                         | 2                  | 1.7                    |

**TABLE S6.** Number and expression of virulence factor categories annotated in whole sewage sample.

| Virulence Factor Category           | Average Total ORFs | Average Expressed ORFs |
|-------------------------------------|--------------------|------------------------|
| Acid resistance                     | 33                 | 28.0                   |
| Acquisition of nutrients            | 2                  | 1.0                    |
| Actin-based motility                | 7                  | 3.0                    |
| Adhesion                            | 248                | 207.3                  |
| Anti-apoptosis                      | 19                 | 17.0                   |
| Apoptosis                           | 1                  | 1.0                    |
| Avoidance of host defense           | 1                  | 0.0                    |
| Bile resistance                     | 1                  | 1.0                    |
| Biofilm                             | 16                 | 15.3                   |
| Capsule                             | 43                 | 38.7                   |
| Cell surface and memb. proteins     | 82                 | 75.0                   |
| Cell wall                           | 1                  | 1.0                    |
| Cell-to-cell spread                 | 13                 | 11.0                   |
| Cellular metabolism                 | 233                | 191.0                  |
| Chaperone                           | 41                 | 35.3                   |
| Cording                             | 45                 | 36.7                   |
| Defense against host imm. resp.     | 90                 | 74.0                   |
| Drug efflux system                  | 6                  | 4.7                    |
| Escape from the phagosome           | 8                  | 4.7                    |
| Excretion                           | 1                  | 0.0                    |
| Heme uptake                         | 5                  | 3.0                    |
| Intracell. survival and replication | 635                | 502.3                  |
| Invasion                            | 347                | 291.3                  |
| Iron uptake                         | 81                 | 54.0                   |
| LPS (Lipopolysaccharide)            | 4                  | 3.7                    |
| Mitogenic                           | 29                 | 29.0                   |
| Modulate host immune response       | 78                 | 60.0                   |
| Molecular mimicry                   | 10                 | 8.0                    |
| Protease                            | 5                  | 3.0                    |
| Regulation of gene expression       | 46                 | 35.7                   |
| Secretion                           | 93                 | 81.3                   |
| Stress                              | 67                 | 50.0                   |
| Toxin                               | 18                 | 10.7                   |
| Two-component system                | 83                 | 57.7                   |
| Type III secretion                  | 53                 | 51.3                   |
| Type VII secretion                  | 13                 | 8.7                    |
| Virulence                           | 2965               | 2294.7                 |

**DATA SET S1.** Expression of ORFs mapped to antibiotic resistance categories

**DATA SET S2.** Comparison of overlapping genes and annotations in *Arcobacter*

**DATA SET S3.** Comparison of *Arcobacter* in RAST

**DATA SET S4.** Expression of ORFs mapped to virulence factors

**DATA SET S5.** Descriptive statistics of *A. cryaerophilus* contigs
